# Supplementary material for: Oncogenic MYC amplifies mitotic perturbations
Source: Open Biol. 2019 Aug 28;9(8):190136. doi: 10.1098/rsob.190136 (PMC6731591; doi:10.1098/rsob.190136)
Supplement: Table S1. iTRAQ dataset [file rsob190136supp2.xlsx]

## Sheet: Table S1
Table S1. iTRAQ dataset with a ProteinPilot score of 1.3
N	Unused	Total	%Cov	%Cov(50)	%Cov(95)	Accession	Name	Species	Peptides(95%)			114:113	PVal 114:113	EF 114:113	LowerCI 114:113	UpperCI 114:113	115:113	PVal 115:113	EF 115:113	LowerCI 115:113	UpperCI 115:113	116:113	PVal 116:113	EF 116:113	LowerCI 116:113	UpperCI 116:113	117:113	PVal 117:113	EF 117:113	LowerCI 117:113	UpperCI 117:113	118:113	PVal 118:113	EF 118:113	LowerCI 118:113	UpperCI 118:113	119:113	PVal 119:113	EF 119:113	LowerCI 119:113	UpperCI 119:113	121:113	PVal 121:113	EF 121:113	LowerCI 121:113	UpperCI 121:113
1	482.87	482.87	80.24	77.2	70.7	sp|Q09666|AHNK_HUMAN	Neuroblast differentiation-associated protein AHNAK OS=Homo sapiens GN=AHNAK PE=1 SV=2	HUMAN	356			0.972747	9.03794e-08	1	0.972747	0.972747	0.981748	0.000172937	1	0.981748	0.981748	0.972747	4.86492e-06	1	0.972747	0.972747	1.10662	0	1	1.10662	1.10662	1.11686	0	1	1.11686	1.11686	1.00925	0.00128579	1	1.00925	1.00925	1.01859	5.4206e-09	1	1.01859	1.01859
2	395.98	392.8	66.44	53.18	46.11	sp|Q15149|PLEC_HUMAN	Plectin OS=Homo sapiens GN=PLEC PE=1 SV=3	HUMAN	221			0.847227	0.0934608	1.04713	0.801678	0.887156	0.586138	5.94423e-05	1.11686	0.544503	0.654636	0.519996	3.49514e-07	1.08643	0.474242	0.564937	1.13763	0.0956679	1.03753	1.09648	1.19124	0.879023	0.31128	1.05682	0.83946	0.928966	0.534564	1.57767e-06	1.1272	0.47863	0.60256	0.448745	2.10336e-07	1.1272	0.405509	0.505825
3	382.37	381.49	70.32	61.99	52.35	sp|P78527|PRKDC_HUMAN	DNA-dependent protein kinase catalytic subunit OS=Homo sapiens GN=PRKDC PE=1 SV=3	HUMAN	305			0.972747	5.11193e-07	1	0.972747	0.972747	1.00925	2.22074e-06	1	1.00925	1.00925	1.02802	4.44089e-16	1	1.02802	1.02802	0.972747	5.56204e-05	1	0.972747	0.972747	0.963829	1.25189e-12	1	0.963829	0.963829	1	0.14975	1	1	1	0.972747	0.000182882	1	0.972747	0.972747
4	338.52	339.09	59.43	48.41	42.06	sp|Q14204|DYHC1_HUMAN	Cytoplasmic dynein 1 heavy chain 1 OS=Homo sapiens GN=DYNC1H1 PE=1 SV=5	HUMAN	216			0.981748	0.0890494	1.00925	0.972747	0.990832	0.972747	6.37099e-05	1.00925	0.963829	0.981748	0.972747	0.00232863	1.00925	0.963829	0.981748	1	0.0446267	1.00925	0.990832	1.00925	0.990832	0.500026	1.00925	0.981748	1	0.990832	0.976101	1.00925	0.981748	1	0.981748	0.568906	1.00925	0.972747	0.990832
5	307.16	310.44	47.16	31.75	23.02	sp|Q9UPN3|MACF1_HUMAN	Microtubule-actin cross-linking factor 1, isoforms 1/2/3/5 OS=Homo sapiens GN=MACF1 PE=1 SV=4	HUMAN	174			0.963829	0.736862	1.09648	0.862979	1.05682	0.666807	0.0494802	1.21339	0.580764	0.809096	0.787046	0.0947635	1.1272	0.679204	0.887156	1.64437	0.0144406	1.28233	1.28233	2.03236	2.03236	8.59599e-05	1.35519	1.49968	2.44343	1.25893	0.32866	1.14815	1.09648	1.39316	0.972747	0.460447	1.11686	0.870964	1.08643
6	296.52	296.41	78.13	74.23	68.04	sp|P21333|FLNA_HUMAN	Filamin-A OS=Homo sapiens GN=FLNA PE=1 SV=4	HUMAN	270			0.990832	0.715471	1	0.990832	0.990832	0.981748	0.0154671	1	0.981748	0.981748	0.990832	0.93839	1	0.990832	0.990832	1.02802	1.12265e-08	1	1.02802	1.02802	1.02802	3.74379e-07	1	1.02802	1.02802	1.01859	0.000154333	1	1.01859	1.01859	1.01859	9.72451e-07	1	1.01859	1.01859
7	269.65	269.57	78.57	76.42	68.06	sp|P49327|FAS_HUMAN	Fatty acid synthase OS=Homo sapiens GN=FASN PE=1 SV=3	HUMAN	248			1.00925	0.00934221	1	1.00925	1.00925	0.963829	2.46217e-05	1	0.963829	0.963829	0.972747	0.00768195	1	0.972747	0.972747	0.972747	0.00394337	1	0.972747	0.972747	0.954993	4.6995e-08	1	0.954993	0.954993	0.954993	9.24479e-07	1	0.954993	0.954993	0.954993	8.14019e-08	1	0.954993	0.954993
8	259.81	260.99	77.4	70.05	62.5	sp|P35579|MYH9_HUMAN	Myosin-9 OS=Homo sapiens GN=MYH9 PE=1 SV=4	HUMAN	301			0.981748	0.36043	1	0.981748	0.981748	0.963829	6.98378e-08	1	0.954993	0.963829	0.954993	9.06676e-08	1	0.954993	0.954993	1.04713	6.44373e-13	1	1.04713	1.04713	1.03753	1.49327e-06	1	1.03753	1.03753	0.981748	0.149635	1	0.981748	0.981748	0.990832	0.645137	1	0.990832	0.990832
9	248.28	275.89	78.36	72.71	67.56	sp|O75369|FLNB_HUMAN	Filamin-B OS=Homo sapiens GN=FLNB PE=1 SV=2	HUMAN	248			0.972747	0.0371738	1	0.972747	0.972747	0.990832	0.204927	1	0.990832	0.990832	0.990832	0.918145	1	0.990832	0.990832	1.02802	1.04468e-07	1	1.02802	1.02802	1.08643	0	1	1.08643	1.08643	1.07647	0	1	1.07647	1.07647	1.09648	0	1	1.09648	1.09648
10	240.63	240.54	76.58	66.78	61.47	sp|Q9Y490|TLN1_HUMAN	Talin-1 OS=Homo sapiens GN=TLN1 PE=1 SV=3	HUMAN	175			0.990832	0.233127	1.00925	0.981748	1	0.972747	0.00137454	1.00925	0.963829	0.981748	0.972747	0.092936	1.00925	0.963829	0.981748	1.00925	0.00205659	1.00925	1	1.01859	1	0.0118215	1.00925	0.990832	1.00925	0.990832	0.476273	1.00925	0.981748	1	1	0.110694	1.00925	0.990832	1.00925
11	229.22	231.33	77.99	64.89	56.67	sp|Q13813|SPTA2_HUMAN	Spectrin alpha chain, brain OS=Homo sapiens GN=SPTAN1 PE=1 SV=3	HUMAN	156			0.870964	0.963167	1.09648	0.816582	0.954993	1.10662	0.00356196	1.04713	1.05682	1.15878	1.57036	6.22631e-08	1.08643	1.44544	1.70608	1.22462	0.00169745	1.04713	1.1695	1.30617	1.78649	4.75818e-10	1.1272	1.58489	2.01372	1.0666	0.319078	1.05682	1.00925	1.11686	0.737904	0.664595	1.08643	0.698232	0.801678
12	225.43	225.44	61.73	51.41	42.78	sp|P46013|KI67_HUMAN	Antigen KI-67 OS=Homo sapiens GN=MKI67 PE=1 SV=2	HUMAN	118			0.887156	0.42075	1.07647	0.816582	0.954993	1.59956	2.4888e-07	1.1695	1.36773	2.18776	2.26986	0	1.25893	1.80302	3.31131	0.405509	5.16923e-08	1.61436	0.258226	0.654636	0.356451	1.0928e-09	1.7378	0.21677	0.619441	1.70608	4.47683e-09	1.20226	1.41906	2.42103	1.65959	7.30926e-12	1.1695	1.41906	2.1677
13	213.94	214.11	79.94	74.51	69.43	sp|Q00610|CLH1_HUMAN	Clathrin heavy chain 1 OS=Homo sapiens GN=CLTC PE=1 SV=5	HUMAN	229			1	0.926818	1.00925	0.990832	1.00925	0.972747	0.0033782	1.00925	0.963829	0.981748	0.990832	0.730453	1.00925	0.981748	1	1.02802	0.00143264	1.00925	1.01859	1.03753	1.02802	0.000670044	1.00925	1.01859	1.03753	1.01859	0.00465017	1.00925	1.00925	1.02802	1.02802	0.00298523	1.00925	1.01859	1.03753
14	209.95	214.79	64.58	57.02	47.55	sp|Q92616|GCN1L_HUMAN	Translational activator GCN1 OS=Homo sapiens GN=GCN1L1 PE=1 SV=6	HUMAN	130			1.03753	0.463963	1.04713	0.990832	1.09648	0.77983	0.205831	1.07647	0.744732	0.83946	0.847227	0.65844	1.05682	0.801678	0.895365	0.57544	0.000110435	1.14815	0.510505	0.660693	0.42462	1.37707e-06	1.22462	0.359749	0.519996	0.539511	1.5749e-05	1.1695	0.49204	0.630957	0.461318	0.0001341	1.27057	0.390841	0.586138
15	209.42	208.7	69.25	61.71	54.39	sp|Q6P2Q9|PRP8_HUMAN	Pre-mRNA-processing-splicing factor 8 OS=Homo sapiens GN=PRPF8 PE=1 SV=2	HUMAN	157			0.990832	0.660158	1.00925	0.981748	1	1.00925	0.449616	1.00925	1	1.01859	1.03753	2.45435e-05	1.00925	1.02802	1.04713	0.981748	0.180233	1.00925	0.972747	0.990832	0.990832	0.99876	1.00925	0.981748	1	1.00925	0.354973	1.00925	1	1.01859	0.972747	0.0374526	1.00925	0.963829	0.981748
16	194.01	196.62	60.61	51.89	40.4	sp|Q14573|ITPR3_HUMAN	Inositol 1,4,5-trisphosphate receptor type 3 OS=Homo sapiens GN=ITPR3 PE=1 SV=2	HUMAN	134			0.325087	0.000309578	1.49968	0.263027	0.487529	1.10662	0.470346	1.08643	1.01859	1.28233	0.744732	0.373457	1.08643	0.698232	0.809096	3.16228	0	1.47231	2.14783	4.7863	3.22107	4.44089e-15	1.52757	2.10863	4.61318	2.96483	1.25164e-11	1.47231	2.01372	4.48745	2.12814	4.09433e-08	1.36773	1.55597	2.99226
17	188.42	191.38	64.72	54.95	42.39	sp|Q01082|SPTB2_HUMAN	Spectrin beta chain, brain 1 OS=Homo sapiens GN=SPTBN1 PE=1 SV=2	HUMAN	116			0.737904	0.194268	1.11686	0.666807	0.824138	0.963829	0.0870302	1.0666	0.912011	1.02802	1.13763	0.0503008	1.0666	1.0666	1.21339	0.928966	0.214009	1.04713	0.879023	0.972747	1.24738	0.000597627	1.09648	1.13763	1.34276	0.862979	0.446937	1.05682	0.816582	0.912011	0.717794	0.643363	1.09648	0.679204	0.787046
18	185.44	186.16	70.69	61.84	55.29	sp|O75643|U520_HUMAN	U5 small nuclear ribonucleoprotein 200 kDa helicase OS=Homo sapiens GN=SNRNP200 PE=1 SV=2	HUMAN	141			0.981748	0.858506	1.00925	0.972747	0.990832	1.00925	0.330574	1.00925	1	1.01859	1.03753	0.000262856	1.00925	1.02802	1.04713	0.981748	0.316061	1.00925	0.972747	0.990832	0.990832	0.604986	1.00925	0.981748	1	1.00925	0.273454	1.00925	1	1.01859	0.963829	0.169204	1.00925	0.954993	0.972747
19	175.95	179.15	41.39	27.63	19.85	sp|Q5T4S7|UBR4_HUMAN	E3 ubiquitin-protein ligase UBR4 OS=Homo sapiens GN=UBR4 PE=1 SV=1	HUMAN	101			1	0.549536	1.09648	0.912011	1.09648	0.711214	0.000497029	1.11686	0.597035	0.794328	0.57544	0.00113325	1.22462	0.510505	0.704693	0.981748	0.353177	1.08643	0.912011	1.0666	0.981748	0.822025	1.08643	0.903649	1.0666	0.946237	0.741814	1.07647	0.879023	1.01859	0.870964	0.718686	1.07647	0.816582	0.937562
20	172.61	177.06	78.41	70.3	63.27	sp|P42704|LPPRC_HUMAN	Leucine-rich PPR motif-containing protein, mitochondrial OS=Homo sapiens GN=LRPPRC PE=1 SV=3	HUMAN	156			0.809096	0.10995	1.10662	0.765597	0.895365	0.862979	0.192382	1.05682	0.824138	0.912011	1.2942	0.0206394	1.08643	1.19124	1.43219	0.625173	0.00010607	1.13763	0.570164	0.711214	0.765597	0.00784648	1.08643	0.724436	0.831764	0.744732	0.000133432	1.09648	0.666807	0.816582	0.331131	6.81337e-11	1.24738	0.283139	0.413047
21	166.26	167.53	40.03	29.36	22.95	sp|Q7Z6Z7|HUWE1_HUMAN	E3 ubiquitin-protein ligase HUWE1 OS=Homo sapiens GN=HUWE1 PE=1 SV=3	HUMAN	95			1.02802	0.550911	1.0666	0.963829	1.10662	0.57544	0.0115071	1.08643	0.529663	0.625173	0.544503	0.012335	1.22462	0.49204	0.666807	1	0.982781	1.08643	0.92045	1.08643	0.912011	0.543083	1.07647	0.83946	0.981748	1.02802	0.999569	1.0666	0.963829	1.09648	0.717794	0.424277	1.07647	0.666807	0.772681
22	161.86	162.21	52.08	41.47	28.6	sp|P49792|RBP2_HUMAN	E3 SUMO-protein ligase RanBP2 OS=Homo sapiens GN=RANBP2 PE=1 SV=2	HUMAN	85			1.05682	0.592903	1.11686	0.946237	1.20226	0.912011	0.7684	1.09648	0.83946	1	1.41906	0.0157046	1.19124	1.19124	1.67494	0.660693	0.184505	1.23595	0.57544	0.816582	0.765597	0.095357	1.13763	0.698232	0.870964	0.816582	0.158457	1.11686	0.717794	0.912011	0.487529	0.011094	1.40605	0.428549	0.685488
23	161.06	162.74	74.05	67.53	61.98	sp|P46940|IQGA1_HUMAN	Ras GTPase-activating-like protein IQGAP1 OS=Homo sapiens GN=IQGAP1 PE=1 SV=1	HUMAN	134			0.972747	0.0806265	1.00925	0.963829	0.981748	1.00925	0.282262	1.00925	1	1.01859	0.990832	0.968514	1.00925	0.981748	1	1.03753	4.19491e-06	1.00925	1.02802	1.04713	1.02802	9.37881e-05	1.00925	1.01859	1.03753	1.0666	2.13857e-09	1.00925	1.05682	1.07647	1.03753	3.69151e-07	1.00925	1.02802	1.04713
24	160.22	163.52	69.98	53.66	43.55	sp|Q14980|NUMA1_HUMAN	Nuclear mitotic apparatus protein 1 OS=Homo sapiens GN=NUMA1 PE=1 SV=2	HUMAN	105			0.912011	0.247513	1.0666	0.847227	0.972747	1.15878	0.0272257	1.11686	1.03753	1.30617	1.51356	1.45626e-05	1.22462	1.23595	1.65959	0.787046	0.0936569	1.07647	0.731139	0.847227	0.758578	0.0807474	1.08643	0.672977	0.824138	0.83946	0.0389813	1.07647	0.751623	0.903649	0.801678	0.795287	1.0666	0.744732	0.855067
25	150.22	157.16	53.75	41.43	33.94	sp|P12270|TPR_HUMAN	Nucleoprotein TPR OS=Homo sapiens GN=TPR PE=1 SV=3	HUMAN	103			0.731139	0.23934	1.18032	0.642688	0.862979	1.24738	0.174148	1.10662	1.1272	1.40605	1.78649	1.68723e-05	1.27057	1.40605	2.0893	1.22462	0.28329	1.09648	1.11686	1.33045	1.38038	0.228634	1.20226	1.14815	1.51356	1.65959	0.00465047	1.24738	1.33045	1.90546	1.55597	0.00249527	1.22462	1.27057	1.78649
26	140.26	147.81	48.17	32.07	23.04	sp|Q14789|GOGB1_HUMAN	Golgin subfamily B member 1 OS=Homo sapiens GN=GOLGB1 PE=1 SV=2	HUMAN	79			0.698232	0.190296	1.27057	0.613762	0.887156	0.895365	0.815641	1.1272	0.816582	1.00925	0.809096	0.85819	1.1695	0.717794	0.946237	1.22462	0.0138902	1.1272	1.08643	1.44544	1.40605	0.000656698	1.22462	1.14815	1.80302	1.19124	0.34583	1.1272	1.05682	1.36773	0.928966	0.848438	1.10662	0.847227	1.02802
27	137.4	138.14	54.52	48.4	43.69	sp|P27708|PYR1_HUMAN	CAD protein OS=Homo sapiens GN=CAD PE=1 SV=3	HUMAN	91			1.08643	0.714548	1.0666	1.01859	1.14815	0.679204	0.0108179	1.15878	0.608135	0.787046	0.642688	0.00965342	1.1695	0.570164	0.751623	0.383707	2.13316e-06	1.43219	0.313329	0.549541	0.296483	1.09083e-07	1.55597	0.239883	0.461318	0.452898	2.49775e-05	1.39316	0.376704	0.630957	0.436516	2.4827e-05	1.33045	0.359749	0.580764
28	136.48	137.37	80	69.01	65.18	sp|Q9P2E9|RRBP1_HUMAN	Ribosome-binding protein 1 OS=Homo sapiens GN=RRBP1 PE=1 SV=4	HUMAN	90			0.751623	0.63843	1.10662	0.672977	0.831764	1.13763	0.816855	1.07647	1.05682	1.21339	1.72187	0.0121029	1.27057	1.35519	1.94089	2.99226	5.83414e-06	1.45881	2.05116	3.37287	3.31131	8.44075e-07	1.49968	2.208	3.94457	1.87068	0.0302078	1.23595	1.51356	2.05116	2.46604	0.000121099	1.39316	1.77011	2.83139
29	135.94	138.8	35.53	20.8	14.03	sp|Q9NU22|MDN1_HUMAN	Midasin OS=Homo sapiens GN=MDN1 PE=1 SV=2	HUMAN	70			1.00925	0.621538	1.10662	0.912011	1.1272	1.41906	0.00180368	1.22462	1.15878	1.6293	1.57036	0.000611007	1.23595	1.27057	1.97697	0.77983	0.032009	1.13763	0.636796	0.887156	0.809096	0.0773073	1.14815	0.660693	0.928966	0.912011	0.268871	1.11686	0.751623	1.01859	0.679204	0.0192269	1.21339	0.487529	0.824138
30	135.72	136.15	89.64	85.91	80.11	sp|P08238|HS90B_HUMAN	Heat shock protein HSP 90-beta OS=Homo sapiens GN=HSP90AB1 PE=1 SV=4	HUMAN	219			1.02802	0.047206	1.00925	1.01859	1.03753	0.937562	0.000834785	1.00925	0.928966	0.946237	0.972747	0.195875	1.00925	0.963829	0.981748	0.928966	0.00302157	1.00925	0.92045	0.937562	0.92045	0.000242368	1.00925	0.912011	0.928966	0.912011	4.53819e-05	1.00925	0.903649	0.92045	0.928966	9.41332e-05	1.00925	0.92045	0.937562
31	133.52	134.06	94.54	89.83	86.06	sp|P14618|KPYM_HUMAN	Pyruvate kinase isozymes M1/M2 OS=Homo sapiens GN=PKM2 PE=1 SV=4	HUMAN	224			0.990832	0.481029	1	0.990832	0.990832	0.963829	0.00948767	1	0.963829	0.963829	0.963829	0.000827407	1	0.963829	0.963829	1.04713	3.21587e-06	1	1.04713	1.04713	1.01859	0.0743764	1	1.01859	1.01859	0.990832	0.782244	1	0.990832	0.990832	1	0.798305	1	1	1
32	131.48	132.63	87.22	83.97	80.16	sp|P12814|ACTN1_HUMAN	Alpha-actinin-1 OS=Homo sapiens GN=ACTN1 PE=1 SV=2	HUMAN	135			1.08643	0.861492	1.07647	1.00925	1.19124	0.772681	0.557935	1.18032	0.660693	0.912011	1.07647	0.738272	1.09648	0.981748	1.14815	2.05116	8.39243e-06	1.35519	1.51356	2.60615	1.8197	6.79661e-05	1.2942	1.40605	2.208	1.55597	0.00998754	1.25893	1.23595	1.8197	1.24738	0.0444628	1.18032	1.05682	1.40605
33	130.94	131.83	86.36	81.93	76.22	sp|P13639|EF2_HUMAN	Elongation factor 2 OS=Homo sapiens GN=EEF2 PE=1 SV=4	HUMAN	192			1.00925	0.00819081	1	1.00925	1.00925	0.928966	9.07541e-10	1	0.928966	0.928966	0.937562	5.71256e-05	1	0.937562	0.937562	0.937562	2.84222e-06	1	0.937562	0.937562	0.928966	6.70411e-09	1	0.928966	0.928966	0.912011	3.12417e-13	1	0.912011	0.912011	0.912011	5.52027e-11	1	0.912011	0.912011
34	129.89	131.71	72.29	62.3	50.86	sp|P07814|SYEP_HUMAN	Bifunctional aminoacyl-tRNA synthetase OS=Homo sapiens GN=EPRS PE=1 SV=5	HUMAN	83			1.20226	0.0742091	1.09648	1.09648	1.30617	0.831764	0.0677198	1.10662	0.772681	0.92045	0.990832	0.478732	1.0666	0.92045	1.05682	0.57544	0.000474798	1.28233	0.505825	0.737904	0.432514	7.46845e-06	1.47231	0.366438	0.636796	0.642688	0.00112728	1.21339	0.570164	0.77983	0.524807	0.000103878	1.38038	0.461318	0.724436
35	128.09	128.37	80.9	75.84	62.19	sp|O75533|SF3B1_HUMAN	Splicing factor 3B subunit 1 OS=Homo sapiens GN=SF3B1 PE=1 SV=3	HUMAN	116			0.946237	0.729622	1.0666	0.903649	1.00925	1.41906	0.0195637	1.20226	1.18032	1.57036	2.26986	6.97643e-07	1.28233	1.77011	2.77971	0.751623	0.291723	1.09648	0.685488	0.824138	1.20226	0.575466	1.09648	1.09648	1.33045	1.48594	0.01118	1.14815	1.2942	1.6293	1.24738	0.0404588	1.15878	1.07647	1.36773
36	126.38	127.27	64.08	51.73	44.74	sp|P11388|TOP2A_HUMAN	DNA topoisomerase 2-alpha OS=Homo sapiens GN=TOP2A PE=1 SV=3	HUMAN	79			0.972747	0.272514	1.08643	0.862979	1.05682	2.03236	9.19533e-05	1.39316	1.45881	2.58226	2.80543	7.10955e-09	1.48594	1.88799	3.98107	0.432514	0.000576813	1.33045	0.322107	0.57544	0.47863	0.0107233	1.44544	0.37325	0.691831	2.80543	9.13754e-07	1.47231	1.90546	4.16869	2.12814	4.81761e-06	1.36773	1.55597	2.91072
37	124.67	128.86	64.09	47.62	37.36	sp|Q9H583|HEAT1_HUMAN	HEAT repeat-containing protein 1 OS=Homo sapiens GN=HEATR1 PE=1 SV=3	HUMAN	89			0.691831	0.0400597	1.1272	0.636796	0.77983	0.679204	0.0345419	1.11686	0.625173	0.758578	1.00925	0.0333529	1.0666	0.946237	1.09648	0.310456	3.88526e-09	1.40605	0.224905	0.436516	0.413047	4.15504e-06	1.2942	0.331131	0.534564	0.47863	7.36641e-05	1.25893	0.405509	0.60256	0.214783	7.26037e-11	1.52757	0.175388	0.328095
38	123.32	127.07	53.64	42.67	35.58	sp|Q14008|CKAP5_HUMAN	Cytoskeleton-associated protein 5 OS=Homo sapiens GN=CKAP5 PE=1 SV=3	HUMAN	70			1.14815	0.497009	1.11686	1.02802	1.27057	1.33045	0.188815	1.20226	1.10662	1.57036	1.92309	0.00100038	1.39316	1.38038	2.39883	1.15878	0.689108	1.15878	1	1.38038	0.711214	0.323098	1.13763	0.648634	0.809096	2.03236	4.67735e-05	1.44544	1.40605	2.60615	2.05116	4.35439e-05	1.38038	1.48594	2.60615
39	120.2	125.14	71.92	61.75	52.98	sp|Q86UP2|KTN1_HUMAN	Kinectin OS=Homo sapiens GN=KTN1 PE=1 SV=1	HUMAN	83			0.529663	0.0820527	1.39316	0.483059	0.737904	1.1695	0.544436	1.11686	1.04713	1.2942	1.39316	0.126703	1.15878	1.20226	1.58489	2.03236	2.61903e-05	1.34276	1.51356	2.48886	2.42103	2.41134e-06	1.43219	1.69044	3.04789	2.05116	0.000249484	1.38038	1.48594	2.53513	1.64437	0.00395612	1.27057	1.2942	1.97697
40	119.47	122.25	58.65	49.55	40.71	sp|Q92621|NU205_HUMAN	Nuclear pore complex protein Nup205 OS=Homo sapiens GN=NUP205 PE=1 SV=3	HUMAN	87			0.679204	0.000466598	1.09648	0.630957	0.744732	0.887156	0.707811	1.07647	0.824138	0.954993	0.928966	0.8687	1.07647	0.870964	1	0.787046	0.0377405	1.08643	0.724436	0.855067	0.570164	0.0022669	1.19124	0.501187	0.679204	0.954993	0.75444	1.0666	0.887156	1.01859	0.554626	0.00525935	1.18032	0.474242	0.654636
41	119.38	119.7	57.32	44.98	38.91	sp|Q14839|CHD4_HUMAN	Chromodomain-helicase-DNA-binding protein 4 OS=Homo sapiens GN=CHD4 PE=1 SV=2	HUMAN	83			0.879023	0.456284	1.11686	0.801678	0.981748	0.981748	0.669393	1.09648	0.903649	1.07647	1.5417	0.000353385	1.14815	1.34276	1.88799	0.554626	0.00395741	1.36773	0.474242	0.758578	0.505825	0.001118	1.34276	0.457088	0.679204	0.912011	0.886222	1.09648	0.83946	1	0.539511	0.0404515	1.28233	0.49204	0.691831
42	119.11	120.38	80	70.94	63.46	sp|Q08211|DHX9_HUMAN	ATP-dependent RNA helicase A OS=Homo sapiens GN=DHX9 PE=1 SV=4	HUMAN	114			1	0.812888	1.00925	0.990832	1.00925	1	0.784276	1.00925	0.990832	1.00925	1.02802	0.000483705	1.00925	1.01859	1.03753	0.972747	0.0207385	1.00925	0.963829	0.981748	0.981748	0.115243	1.00925	0.972747	0.990832	0.990832	0.450609	1.00925	0.981748	1	0.954993	0.00615936	1.00925	0.946237	0.963829
43	118.92	120.2	52.48	39.81	29.25	sp|A5YKK6|CNOT1_HUMAN	CCR4-NOT transcription complex subunit 1 OS=Homo sapiens GN=CNOT1 PE=1 SV=2	HUMAN	65			1.07647	0.274271	1.09648	0.981748	1.20226	0.625173	0.0309398	1.20226	0.570164	0.751623	0.544503	0.103805	1.24738	0.452898	0.679204	0.787046	0.228113	1.09648	0.717794	0.862979	0.691831	0.153846	1.1695	0.619441	0.809096	0.660693	0.0815706	1.1695	0.586138	0.772681	0.487529	0.00601858	1.23595	0.401791	0.60256
44	116.14	116.67	37.06	24.18	15.19	sp|Q9Y4A5|TRRAP_HUMAN	Transformation/transcription domain-associated protein OS=Homo sapiens GN=TRRAP PE=1 SV=3	HUMAN	63			1.07647	0.786538	1.22462	0.879023	1.19124	1.1695	0.333434	1.18032	0.990832	1.2942	1.01859	0.528594	1.10662	0.92045	1.1272	1.11686	0.283583	1.11686	1	1.23595	0.731139	0.0238538	1.1272	0.597035	0.824138	1.13763	0.434459	1.09648	1.03753	1.24738	0.559758	0.0796496	1.27057	0.483059	0.711214
45	115.64	117.05	89.3	85.78	83.79	sp|P11021|GRP78_HUMAN	78 kDa glucose-regulated protein OS=Homo sapiens GN=HSPA5 PE=1 SV=2	HUMAN	193			0.981748	0.955761	1	0.981748	0.981748	1.01859	0.0772044	1	1.01859	1.01859	1.04713	2.81272e-06	1	1.04713	1.04713	1.04713	1.09506e-05	1	1.04713	1.04713	1.0666	3.84388e-06	1	1.0666	1.0666	1.05682	2.49119e-06	1	1.05682	1.05682	1.04713	0.000154611	1	1.04713	1.04713
46	112.31	117.03	59.02	49.27	39.73	sp|Q5VYK3|ECM29_HUMAN	Proteasome-associated protein ECM29 homolog OS=Homo sapiens GN=ECM29 PE=1 SV=2	HUMAN	68			0.946237	0.934377	1.07647	0.870964	1.01859	0.586138	0.0317362	1.13763	0.519996	0.666807	0.549541	0.000263019	1.19124	0.501187	0.654636	0.457088	5.44926e-05	1.21339	0.376704	0.554626	0.436516	1.98954e-05	1.30617	0.390841	0.570164	0.505825	1.49162e-06	1.25893	0.428549	0.636796	0.420727	1.31588e-07	1.24738	0.369828	0.524807
47	110.6	112.58	63.17	48.77	37.77	sp|Q14152|EIF3A_HUMAN	Eukaryotic translation initiation factor 3 subunit A OS=Homo sapiens GN=EIF3A PE=1 SV=1	HUMAN	77			1.04713	0.586185	1.05682	0.990832	1.11686	0.630957	0.0118178	1.15878	0.519996	0.731139	0.77983	0.0643022	1.09648	0.731139	0.855067	0.519996	0.000784093	1.18032	0.457088	0.613762	0.469894	1.96018e-05	1.24738	0.405509	0.586138	0.483059	0.00014251	1.22462	0.409261	0.591562	0.416869	0.00202188	1.2942	0.349945	0.539511
48	109.73	110.75	92.74	86.58	79.86	sp|P52272|HNRPM_HUMAN	Heterogeneous nuclear ribonucleoprotein M OS=Homo sapiens GN=HNRNPM PE=1 SV=3	HUMAN	140			0.744732	0.0919301	1.08643	0.698232	0.809096	0.794328	0.406075	1.08643	0.751623	0.862979	1.40605	0.121171	1.0666	1.31826	1.57036	1.01859	0.655095	1.04713	0.972747	1.07647	1.04713	0.566454	1.04713	1	1.08643	1.08643	0.667798	1.05682	1.02802	1.13763	0.679204	0.756974	1.05682	0.648634	0.717794
49	109.06	116.04	79.83	73.85	71.48	sp|P14625|ENPL_HUMAN	Endoplasmin OS=Homo sapiens GN=HSP90B1 PE=1 SV=1	HUMAN	135			0.990832	0.629459	1.00925	0.981748	1	1.00925	0.185692	1.00925	1	1.01859	1.03753	2.68221e-05	1.00925	1.02802	1.04713	1.04713	5.69482e-05	1.00925	1.03753	1.05682	1.05682	5.42848e-07	1.00925	1.04713	1.0666	1.05682	2.25472e-06	1.00925	1.04713	1.0666	1.02802	0.000572441	1.00925	1.01859	1.03753
50	108.45	109.68	71.38	63.01	55.12	sp|Q86VP6|CAND1_HUMAN	Cullin-associated NEDD8-dissociated protein 1 OS=Homo sapiens GN=CAND1 PE=1 SV=2	HUMAN	91			1.09648	0.473244	1.03753	1.05682	1.14815	0.510505	0.000443067	1.20226	0.448745	0.613762	0.758578	0.00572278	1.08643	0.672977	0.824138	0.704693	0.00565177	1.10662	0.619441	0.77983	0.49204	3.7493e-05	1.15878	0.413047	0.570164	0.816582	0.130481	1.04713	0.765597	0.855067	0.724436	0.209404	1.08643	0.672977	0.787046
51	108.27	110.74	74.76	70.13	66.64	sp|P22314|UBA1_HUMAN	Ubiquitin-like modifier-activating enzyme 1 OS=Homo sapiens GN=UBA1 PE=1 SV=3	HUMAN	119			0.862979	0.863812	1.0666	0.816582	0.92045	0.401791	9.20506e-05	1.23595	0.353183	0.496592	0.448745	0.000763321	1.22462	0.394457	0.549541	1.09648	0.0657392	1.04713	1.04713	1.15878	0.831764	0.459551	1.08643	0.77983	0.903649	0.83946	0.620263	1.07647	0.77983	0.903649	0.539511	0.808962	1.1272	0.496592	0.608135
52	107.43	108.25	85.86	80.4	75.19	sp|P55072|TERA_HUMAN	Transitional endoplasmic reticulum ATPase OS=Homo sapiens GN=VCP PE=1 SV=4	HUMAN	117			0.990832	0.728837	1.00925	0.981748	1	0.981748	0.181853	1.00925	0.972747	0.990832	1	0.973268	1.00925	0.990832	1.00925	1.03753	0.00515943	1.00925	1.02802	1.04713	1.03753	0.00781188	1.00925	1.02802	1.04713	1.04713	0.00126034	1.00925	1.03753	1.05682	1.03753	0.022053	1.00925	1.02802	1.04713
53	106.94	109.05	66.79	55.87	47.36	sp|Q9BQG0|MBB1A_HUMAN	Myb-binding protein 1A OS=Homo sapiens GN=MYBBP1A PE=1 SV=2	HUMAN	73			0.963829	0.69739	1.0666	0.879023	1.02802	1.0666	0.304946	1.05682	1.00925	1.13763	1.61436	0.000235569	1.10662	1.45881	1.70608	0.328095	0.000573169	1.36773	0.265461	0.448745	0.42462	0.00181948	1.25893	0.325087	0.534564	0.613762	0.0276986	1.1272	0.515229	0.691831	0.409261	0.0017714	1.22462	0.331131	0.501187
54	106.7	109.84	57.08	44.31	34.69	sp|Q14690|RRP5_HUMAN	Protein RRP5 homolog OS=Homo sapiens GN=PDCD11 PE=1 SV=3	HUMAN	57			0.972747	0.824622	1.07647	0.895365	1.04713	0.954993	0.303428	1.0666	0.887156	1.01859	1.45881	0.00112429	1.1695	1.24738	1.70608	0.534564	0.024959	1.31826	0.432514	0.704693	0.534564	0.0105897	1.31826	0.409261	0.704693	0.691831	0.0843133	1.14815	0.586138	0.794328	0.47863	0.031394	1.43219	0.363078	0.685488
55	104.99	105.69	63.6	57.63	52.54	sp|Q16531|DDB1_HUMAN	DNA damage-binding protein 1 OS=Homo sapiens GN=DDB1 PE=1 SV=1	HUMAN	74			1.04713	0.543203	1.08643	0.963829	1.13763	0.648634	0.598204	1.18032	0.586138	0.765597	1.01859	0.379149	1.0666	0.954993	1.11686	0.591562	0.123244	1.15878	0.524807	0.685488	0.539511	0.15658	1.19124	0.448745	0.642688	1.36773	0.0330008	1.1695	1.1695	1.5417	0.855067	0.46827	1.0666	0.809096	0.912011
56	103.93	104.49	66.85	59.49	54.59	sp|P53396|ACLY_HUMAN	ATP-citrate synthase OS=Homo sapiens GN=ACLY PE=1 SV=3	HUMAN	73			1.1695	0.0962525	1.05682	1.10662	1.27057	0.444631	0.00176162	1.22462	0.383707	0.544503	0.625173	0.0141464	1.20226	0.559758	0.751623	0.457088	0.000613519	1.2942	0.390841	0.591562	0.405509	2.07513e-05	1.35519	0.349945	0.549541	0.597035	0.00299375	1.18032	0.515229	0.704693	0.554626	0.00934745	1.15878	0.501187	0.642688
57	103.91	105.68	87.78	82.92	73.05	sp|P38646|GRP75_HUMAN	Stress-70 protein, mitochondrial OS=Homo sapiens GN=HSPA9 PE=1 SV=2	HUMAN	185			0.981748	0.504048	1	0.981748	0.981748	1	0.716332	1	1	1	1.01859	0.0195649	1	1.01859	1.01859	1	0.475025	1	1	1	1.01859	0.0131639	1	1.01859	1.01859	1.02802	0.000602965	1	1.02802	1.02802	1.01859	0.103076	1	1.01859	1.01859
58	103.75	105.14	84.91	76.32	70.48	sp|Q13200|PSMD2_HUMAN	26S proteasome non-ATPase regulatory subunit 2 OS=Homo sapiens GN=PSMD2 PE=1 SV=3	HUMAN	114			1.23595	0.206618	1.0666	1.15878	1.36773	0.349945	3.87839e-05	1.21339	0.313329	0.42462	0.597035	0.030278	1.1272	0.544503	0.672977	1.03753	0.879358	1.04713	0.990832	1.09648	0.981748	0.491069	1.04713	0.937562	1.02802	0.630957	0.0543779	1.11686	0.549541	0.704693	0.717794	0.369579	1.08643	0.654636	0.77983
59	103.37	104.29	61.98	53.52	46.01	sp|O60264|SMCA5_HUMAN	SWI/SNF-related matrix-associated actin-dependent regulator of chromatin subfamily A member 5 OS=Homo sapiens GN=SMARCA5 PE=1 SV=1	HUMAN	71			0.879023	0.279245	1.0666	0.824138	0.937562	0.83946	0.67221	1.0666	0.77983	0.895365	1.72187	0.00457781	1.20226	1.43219	1.94089	0.654636	0.0426239	1.14815	0.597035	0.751623	0.648634	0.0245939	1.11686	0.60256	0.724436	1.13763	0.967895	1.11686	1.01859	1.23595	0.630957	0.213142	1.13763	0.570164	0.717794
60	103.27	103.95	71.08	59.61	48.77	sp|P18206|VINC_HUMAN	Vinculin OS=Homo sapiens GN=VCL PE=1 SV=4	HUMAN	65			0.855067	0.773359	1.07647	0.801678	0.92045	0.597035	0.0290531	1.27057	0.534564	0.758578	0.529663	0.0234081	1.34276	0.440555	0.711214	1.64437	3.19003e-06	1.20226	1.36773	1.90546	1.6293	0.000149947	1.21339	1.34276	1.88799	1.03753	0.714872	1.0666	0.972747	1.10662	1.0666	0.200193	1.0666	1	1.13763
61	101.55	107.23	47.22	33.54	20.65	sp|O75691|UTP20_HUMAN	Small subunit processome component 20 homolog OS=Homo sapiens GN=UTP20 PE=1 SV=3	HUMAN	53			0.963829	0.361192	1.08643	0.887156	1.04713	0.744732	0.245014	1.18032	0.672977	0.879023	1.1272	0.0339687	1.1272	1	1.2942	0.47863	3.34623e-05	1.31826	0.390841	0.630957	0.47863	2.75421e-07	1.38038	0.353183	0.660693	0.529663	5.13237e-06	1.28233	0.394457	0.679204	0.401791	6.89337e-06	1.48594	0.313329	0.597035
62	101.05	102.33	67.73	58.82	49.75	sp|P53621|COPA_HUMAN	Coatomer subunit alpha OS=Homo sapiens GN=COPA PE=1 SV=2	HUMAN	62			0.83946	0.965181	1.07647	0.772681	0.903649	0.452898	0.000722839	1.24738	0.409261	0.564937	0.524807	0.0123399	1.23595	0.420727	0.648634	1.05682	0.143011	1.07647	0.981748	1.14815	0.912011	0.625037	1.07647	0.847227	0.981748	0.672977	0.175242	1.13763	0.613762	0.765597	0.672977	0.80985	1.1272	0.613762	0.758578
63	100.64	101.58	48.47	33.77	27.8	sp|Q9NZM1|MYOF_HUMAN	Myoferlin OS=Homo sapiens GN=MYOF PE=1 SV=1	HUMAN	56			0.654636	0.0287594	1.23595	0.544503	0.809096	1	0.113488	1.11686	0.895365	1.11686	0.724436	0.0423564	1.1695	0.539511	0.847227	3.98107	6.05595e-07	1.36773	2.91072	5.29663	4.74242	4.66926e-10	1.38038	3.43558	6.85488	2.24905	0.00936495	1.27057	1.77011	2.72898	1.58489	0.316067	1.1695	1.35519	1.92309
64	100.09	101.02	66.03	60.78	54.62	sp|Q9BSJ8|ESYT1_HUMAN	Extended synaptotagmin-1 OS=Homo sapiens GN=ESYT1 PE=1 SV=1	HUMAN	96			0.359749	8.63637e-05	1.05682	0.340408	0.380189	1.13763	0.711629	1.07647	1.05682	1.22462	1.15878	0.435529	1.07647	1.07647	1.31826	2.07014	0.0068454	1.14815	1.80302	2.46604	2.12814	0.0122043	1.15878	1.83654	2.46604	2.46604	0.000438589	1.1695	2.10863	2.88403	1.69044	0.133691	1.11686	1.51356	1.92309
65	99.09	99.28	56.18	43.35	35.95	sp|Q13428|TCOF_HUMAN	Treacle protein OS=Homo sapiens GN=TCOF1 PE=1 SV=3	HUMAN	60			1.07647	0.39408	1.0666	1.00925	1.14815	0.963829	0.988712	1.0666	0.903649	1.02802	1.40605	2.41137e-06	1.13763	1.23595	1.55597	0.642688	0.000490499	1.25893	0.539511	0.809096	0.660693	0.00844373	1.22462	0.580764	0.809096	0.937562	0.446882	1.0666	0.870964	1	1.13763	0.0434047	1.09648	1.03753	1.21339
66	98.83	100.65	56.01	46.56	39.14	sp|Q14160|SCRIB_HUMAN	Protein scribble homolog OS=Homo sapiens GN=SCRIB PE=1 SV=4	HUMAN	57			0.879023	0.256499	1.09648	0.751623	0.963829	1.14815	0.370314	1.11686	1.02802	1.28233	1.25893	0.157161	1.1272	1.11686	1.39316	0.642688	0.00227299	1.24738	0.436516	0.801678	0.501187	0.000607651	1.33045	0.353183	0.666807	0.981748	0.615676	1.09648	0.870964	1.07647	0.744732	0.371719	1.1695	0.625173	0.870964
67	97.82	100.96	66.34	53.8	49.3	sp|P19338|NUCL_HUMAN	Nucleolin OS=Homo sapiens GN=NCL PE=1 SV=3	HUMAN	93			1.00925	0.531456	1	1.00925	1.00925	1	0.958896	1	1	1	1.07647	5.93692e-05	1	1.07647	1.07647	0.928966	5.01881e-07	1.00925	0.928966	0.937562	0.954993	2.06181e-05	1	0.954993	0.954993	0.981748	0.00366876	1	0.981748	0.981748	0.963829	0.0882023	1	0.963829	0.963829
68	96.98	97.32	87.96	83.94	75.57	sp|P10809|CH60_HUMAN	60 kDa heat shock protein, mitochondrial OS=Homo sapiens GN=HSPD1 PE=1 SV=2	HUMAN	207			0.990832	0.803807	1	0.990832	0.990832	1	0.972794	1	1	1	1.03753	0.000159104	1	1.03753	1.03753	0.972747	0.0935545	1	0.972747	0.972747	0.972747	0.0372181	1	0.972747	0.972747	1.00925	0.216226	1	1.00925	1.00925	0.990832	0.642498	1	0.990832	0.990832
69	95.61	96.26	62.07	51.71	43.72	sp|P55265|DSRAD_HUMAN	Double-stranded RNA-specific adenosine deaminase OS=Homo sapiens GN=ADAR PE=1 SV=4	HUMAN	61			0.963829	0.262838	1.07647	0.887156	1.03753	1.25893	0.226615	1.13763	1.10662	1.38038	2.208	0.00172712	1.30617	1.69044	2.60615	1.30617	0.266627	1.13763	1.14815	1.49968	1.61436	0.0659609	1.1695	1.38038	1.87068	1.70608	0.0838726	1.21339	1.40605	2.05116	1.00925	0.426571	1.0666	0.946237	1.08643
70	95.6	95.87	78.13	59.34	55.49	sp|Q7KZF4|SND1_HUMAN	Staphylococcal nuclease domain-containing protein 1 OS=Homo sapiens GN=SND1 PE=1 SV=1	HUMAN	83			0.912011	0.373641	1.04713	0.870964	0.954993	0.679204	0.0492389	1.18032	0.630957	0.801678	0.972747	0.932585	1.04713	0.928966	1.01859	1.1272	0.243563	1.0666	1.05682	1.18032	1.0666	0.518295	1.05682	1.00925	1.13763	0.847227	0.0016256	1.0666	0.787046	0.903649	0.630957	0.00624253	1.21339	0.564937	0.765597
71	95.58	96.73	74.15	63.85	57.47	sp|P55060|XPO2_HUMAN	Exportin-2 OS=Homo sapiens GN=CSE1L PE=1 SV=3	HUMAN	75			1.04713	0.749968	1.05682	0.990832	1.10662	0.440555	1.08534e-05	1.31826	0.331131	0.580764	0.586138	0.00219154	1.18032	0.505825	0.691831	0.376704	6.62854e-06	1.35519	0.265461	0.510505	0.337287	2.16675e-06	1.44544	0.244343	0.487529	0.625173	0.0184126	1.13763	0.524807	0.711214	0.510505	0.0567343	1.25893	0.416869	0.642688
72	95.5	96.2	98.4	98.4	93.07	sp|P63261|ACTG_HUMAN	Actin, cytoplasmic 2 OS=Homo sapiens GN=ACTG1 PE=1 SV=1	HUMAN	299			0.954993	0.658936	1.43219	0.666807	1.36773	0.77983	0.495171	1.34276	0.564937	1.04713	0.765597	0.50049	1.35519	0.544503	1.03753	0.954993	0.746959	1.48594	0.636796	1.41906	0.895365	0.576755	1.47231	0.597035	1.31826	0.625173	0.405935	1.31826	0.432514	0.824138	0.758578	0.43058	1.44544	0.501187	1.09648
73	95.28	96.79	38.44	27.62	23.8	sp|Q9UQ35|SRRM2_HUMAN	Serine/arginine repetitive matrix protein 2 OS=Homo sapiens GN=SRRM2 PE=1 SV=2	HUMAN	77			0.981748	0.399086	1.07647	0.92045	1.05682	1.21339	0.00428554	1.0666	1.13763	1.28233	1.43219	0.000147345	1.11686	1.28233	1.59956	0.937562	0.410662	1.11686	0.879023	1.04713	0.847227	0.742764	1.09648	0.787046	0.928966	1.23595	0.0155611	1.08643	1.13763	1.38038	1.05682	0.0615897	1.07647	0.981748	1.1272
74	95	108.63	82.66	75.23	70.28	sp|P11142|HSP7C_HUMAN	Heat shock cognate 71 kDa protein OS=Homo sapiens GN=HSPA8 PE=1 SV=1	HUMAN	200			1.01859	0.265243	1.00925	1.00925	1.02802	0.928966	0.00852797	1.00925	0.92045	0.937562	0.972747	0.862518	1.00925	0.963829	0.981748	0.937562	0.0134992	1.00925	0.928966	0.946237	0.937562	0.00214187	1.00925	0.928966	0.946237	0.92045	0.000590063	1.00925	0.912011	0.928966	0.937562	0.0145971	1.00925	0.928966	0.946237
75	93.89	94.54	65.45	61.71	55.37	sp|P16615|AT2A2_HUMAN	Sarcoplasmic/endoplasmic reticulum calcium ATPase 2 OS=Homo sapiens GN=ATP2A2 PE=1 SV=1	HUMAN	81			0.487529	0.00913681	1.27057	0.444631	0.619441	1.57036	0.0991399	1.19124	1.31826	1.70608	1.51356	0.0237103	1.15878	1.30617	1.6293	1.78649	0.0124569	1.23595	1.44544	2.03236	1.92309	0.00835303	1.27057	1.51356	2.1677	1.83654	0.00286598	1.23595	1.48594	2.0893	1.08643	0.522575	1.05682	1.02802	1.14815
76	93.59	93.61	48.47	39.65	32.33	sp|Q04637|IF4G1_HUMAN	Eukaryotic translation initiation factor 4 gamma 1 OS=Homo sapiens GN=EIF4G1 PE=1 SV=4	HUMAN	56			0.990832	0.667329	1.07647	0.92045	1.0666	0.685488	0.0189895	1.18032	0.580764	0.809096	0.801678	0.342428	1.1272	0.717794	0.903649	0.487529	0.000427195	1.2942	0.369828	0.630957	0.416869	6.65447e-05	1.41906	0.316228	0.591562	0.30761	4.2119e-06	1.58489	0.231206	0.487529	0.353183	1.44485e-05	1.38038	0.275423	0.487529
77	91.89	93.26	74.67	67.77	58.46	sp|Q9Y4L1|HYOU1_HUMAN	Hypoxia up-regulated protein 1 OS=Homo sapiens GN=HYOU1 PE=1 SV=1	HUMAN	71			0.847227	0.989583	1.07647	0.751623	0.912011	1.47231	0.0300799	1.11686	1.31826	1.57036	1.95884	1.24803e-05	1.23595	1.58489	2.26986	1.49968	0.00105517	1.1272	1.33045	1.67494	1.75388	0.00452106	1.22462	1.43219	2.1677	2.39883	1.79669e-06	1.35519	1.77011	3.0761	1.10662	0.0589558	1.0666	1.03753	1.18032
78	91.08	96.63	47.32	25.83	14.55	sp|P49454|CENPF_HUMAN	Centromere protein F OS=Homo sapiens GN=CENPF PE=1 SV=2	HUMAN	45			0.666807	0.454946	1.25893	0.515229	0.83946	2.58226	1.23499e-10	1.51356	1.70608	4.28549	2.83139	1.43017e-11	1.58489	1.78649	5.01187	0.981748	0.953572	1.11686	0.887156	1.09648	1.02802	0.296042	1.1272	0.912011	1.18032	1.78649	0.000179394	1.30617	1.36773	2.80543	1.80302	3.87465e-05	1.31826	1.36773	2.65461
79	90.99	93.64	77.54	65.99	58.93	sp|P11586|C1TC_HUMAN	C-1-tetrahydrofolate synthase, cytoplasmic OS=Homo sapiens GN=MTHFD1 PE=1 SV=3	HUMAN	67			1.03753	0.135874	1.0666	0.972747	1.09648	0.529663	0.0551307	1.28233	0.47863	0.679204	0.636796	0.257553	1.21339	0.554626	0.772681	0.334195	0.000502824	1.48594	0.280543	0.496592	0.30479	4.74575e-05	1.47231	0.242103	0.448745	0.510505	0.00778247	1.27057	0.432514	0.648634	0.564937	0.151249	1.20226	0.510505	0.679204
6984	90.99	93.64	77.54	65.99	58.93	sp|P11586|C1TC_HUMAN	C-1-tetrahydrofolate synthase, cytoplasmic OS=Homo sapiens GN=MTHFD1 PE=1 SV=3	HUMAN	67			1.03753	0.135874	1.0666	0.972747	1.09648	0.529663	0.0551307	1.28233	0.47863	0.679204	0.636796	0.257553	1.21339	0.554626	0.772681	0.334195	0.000502824	1.48594	0.280543	0.496592	0.30479	4.74575e-05	1.47231	0.242103	0.448745	0.510505	0.00778247	1.27057	0.432514	0.648634	0.564937	0.151249	1.20226	0.510505	0.679204
80	90.52	90.99	82.18	75.23	71.17	sp|P40939|ECHA_HUMAN	Trifunctional enzyme subunit alpha, mitochondrial OS=Homo sapiens GN=HADHA PE=1 SV=2	HUMAN	81			0.717794	0.246128	1.09648	0.679204	0.787046	0.862979	0.960362	1.05682	0.824138	0.912011	1.30617	0.377979	1.13763	1.14815	1.40605	2.1677	0.000366617	1.27057	1.70608	2.48886	2.07014	0.00371378	1.25893	1.64437	2.55859	2.39883	0.00108347	1.2942	1.85353	2.93765	1.8197	0.00322648	1.15878	1.57036	2.10863
81	90.34	90.37	93.35	90.69	87.14	sp|P68363|TBA1B_HUMAN	Tubulin alpha-1B chain OS=Homo sapiens GN=TUBA1B PE=1 SV=1	HUMAN	200			0.570164	0.169331	2.60615	0.149968	1.48594	0.963829	0.811005	2.1677	0.436516	2.0893	1.07647	0.959366	2.1677	0.496592	2.35505	0.461318	0.146746	2.07014	0.0711213	0.954993	0.928966	0.746649	1.35519	0.666807	1.25893	0.452898	0.100688	1.57036	0.0912011	0.711214	0.946237	0.935665	1.45881	0.630957	1.38038
82	89.94	95.22	63.85	59.41	46.84	sp|Q15393|SF3B3_HUMAN	Splicing factor 3B subunit 3 OS=Homo sapiens GN=SF3B3 PE=1 SV=4	HUMAN	89			0.83946	0.903894	1.07647	0.794328	0.903649	1.01859	0.485647	1.05682	0.963829	1.10662	1.09648	0.0346947	1.05682	1.03753	1.15878	0.654636	0.32775	1.20226	0.60256	0.787046	0.505825	0.00769141	1.23595	0.474242	0.625173	0.903649	0.51372	1.0666	0.855067	0.963829	0.42462	0.0145772	1.35519	0.387258	0.57544
83	89.52	89.18	92.4	88.02	84.33	sp|P06733|ENOA_HUMAN	Alpha-enolase OS=Homo sapiens GN=ENO1 PE=1 SV=2	HUMAN	195			1.01859	0.0572939	1	1.01859	1.01859	0.946237	0.0162077	1	0.946237	0.946237	0.954993	0.245427	1	0.954993	0.954993	0.928966	0.0254147	1	0.928966	0.928966	0.912011	6.00011e-05	1.00925	0.903649	0.92045	0.92045	0.000929234	1	0.92045	0.92045	0.937562	0.0135357	1.00925	0.928966	0.946237
84	89.24	90.14	67.46	50.12	37.63	sp|Q9UQE7|SMC3_HUMAN	Structural maintenance of chromosomes protein 3 OS=Homo sapiens GN=SMC3 PE=1 SV=2	HUMAN	50			0.83946	0.518466	1.08643	0.77983	0.912011	1.48594	0.0580703	1.09648	1.35519	1.61436	1.61436	0.013641	1.15878	1.39316	1.77011	0.990832	0.282083	1.07647	0.912011	1.0666	1.11686	0.756996	1.1272	0.990832	1.21339	1.61436	0.04937	1.14815	1.40605	1.77011	1.30617	0.0460736	1.13763	1.14815	1.43219
85	88.96	91.16	64.43	55.28	51.17	sp|O14980|XPO1_HUMAN	Exportin-1 OS=Homo sapiens GN=XPO1 PE=1 SV=1	HUMAN	64			1.04713	0.746527	1.07647	0.972747	1.1272	0.432514	0.00015981	1.28233	0.383707	0.554626	0.515229	5.99174e-05	1.22462	0.452898	0.630957	0.809096	0.101591	1.08643	0.737904	0.879023	0.737904	0.0137109	1.09648	0.679204	0.809096	0.539511	0.000370353	1.22462	0.436516	0.660693	0.319154	5.34096e-07	1.43219	0.260615	0.457088
86	88.8	89.92	68.13	46.15	35.12	sp|Q14683|SMC1A_HUMAN	Structural maintenance of chromosomes protein 1A OS=Homo sapiens GN=SMC1A PE=1 SV=2	HUMAN	51			0.887156	0.965223	1.10662	0.801678	0.981748	1.27057	0.0322312	1.1272	1.1272	1.43219	2.0893	3.46229e-05	1.34276	1.55597	2.48886	0.794328	0.526017	1.14815	0.724436	0.912011	1	0.469063	1.10662	0.903649	1.08643	1.31826	0.101008	1.18032	1.11686	1.57036	1.04713	0.0308227	1.08643	0.963829	1.13763
87	88.56	92.16	73.87	67.18	63.99	sp|Q15029|U5S1_HUMAN	116 kDa U5 small nuclear ribonucleoprotein component OS=Homo sapiens GN=EFTUD2 PE=1 SV=1	HUMAN	71			1	0.641091	1.08643	0.92045	1.0666	0.870964	0.832924	1.08643	0.794328	0.946237	1.41906	0.00972852	1.11686	1.27057	1.61436	0.981748	0.817194	1.07647	0.895365	1.05682	0.831764	0.532343	1.08643	0.765597	0.903649	1.08643	0.776745	1.0666	1.01859	1.15878	0.505825	0.0519627	1.18032	0.428549	0.597035
88	88.44	89.18	69.63	55.03	48.13	sp|P09874|PARP1_HUMAN	Poly [ADP-ribose] polymerase 1 OS=Homo sapiens GN=PARP1 PE=1 SV=4	HUMAN	63			0.895365	0.870952	1.0666	0.847227	0.954993	1.34276	0.163673	1.08643	1.23595	1.45881	1.58489	0.00104839	1.14815	1.38038	1.83654	0.310456	0.000233725	1.64437	0.251189	0.510505	0.440555	0.00109336	1.48594	0.353183	0.654636	1	0.643643	1.05682	0.946237	1.0666	0.731139	0.417687	1.1272	0.660693	0.824138
89	88.21	90.18	60.7	50.16	40.57	sp|P41252|SYIC_HUMAN	Isoleucyl-tRNA synthetase, cytoplasmic OS=Homo sapiens GN=IARS PE=1 SV=2	HUMAN	61			1.07647	0.59756	1.0666	1.00925	1.14815	0.887156	0.132297	1.0666	0.831764	0.946237	0.912011	0.577427	1.07647	0.847227	0.981748	0.510505	0.000307679	1.2942	0.405509	0.660693	0.487529	0.000969231	1.27057	0.376704	0.619441	0.554626	0.00249469	1.25893	0.465586	0.698232	0.363078	8.38377e-05	1.35519	0.277971	0.49204
90	87.55	89.06	55.5	41.2	31.96	sp|Q9UIG0|BAZ1B_HUMAN	Tyrosine-protein kinase BAZ1B OS=Homo sapiens GN=BAZ1B PE=1 SV=2	HUMAN	46			1	0.61881	1.07647	0.928966	1.07647	1.43219	0.00536452	1.1695	1.22462	1.64437	1.87068	6.71405e-07	1.28233	1.45881	2.22844	0.744732	0.274142	1.22462	0.636796	0.912011	0.77983	0.431146	1.21339	0.704693	0.946237	1.5417	0.00287174	1.20226	1.28233	1.75388	1.13763	0.00439047	1.07647	1.05682	1.24738
91	87.36	88.22	77.09	62.91	56.24	sp|Q00839|HNRPU_HUMAN	Heterogeneous nuclear ribonucleoprotein U OS=Homo sapiens GN=HNRNPU PE=1 SV=6	HUMAN	113			1.01859	0.673195	1.0666	0.954993	1.07647	0.903649	0.486201	1.04713	0.855067	0.946237	1.5417	0.00264001	1.23595	1.24738	1.8197	1.33045	0.155009	1.14815	1.15878	1.48594	1.45881	0.24035	1.19124	1.22462	1.7378	1.1695	0.829588	1.11686	1.04713	1.27057	0.654636	0.34813	1.07647	0.619441	0.704693
92	86.66	87.02	80.59	74.89	70.21	sp|Q14974|IMB1_HUMAN	Importin subunit beta-1 OS=Homo sapiens GN=KPNB1 PE=1 SV=2	HUMAN	102			0.895365	0.624228	1.05682	0.855067	0.946237	0.549541	0.00143582	1.13763	0.49204	0.625173	0.660693	0.159963	1.10662	0.613762	0.731139	0.457088	0.00217812	1.14815	0.394457	0.524807	0.436516	4.04189e-05	1.18032	0.380189	0.515229	0.570164	0.000864542	1.1272	0.49204	0.642688	0.42462	0.000148269	1.13763	0.369828	0.483059
93	86.44	86.64	66.22	55.46	47.94	sp|P26640|SYVC_HUMAN	Valyl-tRNA synthetase OS=Homo sapiens GN=VARS PE=1 SV=4	HUMAN	54			0.895365	0.701558	1.08643	0.816582	0.972747	0.524807	5.15578e-05	1.24738	0.420727	0.654636	0.619441	0.0875681	1.24738	0.539511	0.772681	0.346737	7.10977e-07	1.41906	0.253513	0.49204	0.325087	4.34591e-07	1.64437	0.235505	0.534564	0.591562	0.000499327	1.25893	0.465586	0.744732	0.394457	2.37914e-05	1.39316	0.288403	0.549541
94	86.27	86.94	60.22	52.98	47.41	sp|P05023|AT1A1_HUMAN	Sodium/potassium-transporting ATPase subunit alpha-1 OS=Homo sapiens GN=ATP1A1 PE=1 SV=1	HUMAN	73			0.758578	0.952626	1.21339	0.666807	0.92045	1.36773	0.14709	1.19124	1.14815	1.49968	1.47231	0.0112981	1.21339	1.21339	1.65959	1.38038	0.0120125	1.18032	1.1695	1.57036	1.88799	0.000687394	1.33045	1.41906	2.26986	1.67494	0.00594929	1.2942	1.2942	2.01372	1.28233	0.00985711	1.1272	1.13763	1.43219
95	86.12	86.18	93.13	90.75	87.16	sp|P04406|G3P_HUMAN	Glyceraldehyde-3-phosphate dehydrogenase OS=Homo sapiens GN=GAPDH PE=1 SV=3	HUMAN	203			1.02802	0.0125055	1	1.02802	1.02802	0.946237	1.20466e-05	1	0.946237	0.946237	0.954993	0.00696669	1	0.954993	0.954993	1	0.447477	1	1	1	0.972747	0.100845	1	0.972747	0.972747	0.963829	0.0114253	1	0.963829	0.963829	0.990832	0.752292	1	0.990832	0.990832
96	84.78	85.2	82.64	72.69	68.54	sp|P25705|ATPA_HUMAN	ATP synthase subunit alpha, mitochondrial OS=Homo sapiens GN=ATP5A1 PE=1 SV=1	HUMAN	152			0.972747	0.198677	1.00925	0.963829	0.981748	1.00925	0.126722	1.00925	1	1.01859	1	0.654992	1.00925	0.990832	1.00925	1.02802	0.00353957	1.00925	1.01859	1.03753	1.02802	0.0196067	1.00925	1.01859	1.03753	1.01859	0.0847917	1.00925	1.00925	1.02802	0.990832	0.761133	1.00925	0.981748	1
97	83.5	83.65	73.2	67.48	61.76	sp|Q14697|GANAB_HUMAN	Neutral alpha-glucosidase AB OS=Homo sapiens GN=GANAB PE=1 SV=3	HUMAN	86			0.666807	0.186786	1.25893	0.586138	0.83946	1.36773	0.15619	1.15878	1.18032	1.48594	1.70608	0.0147995	1.28233	1.33045	1.99526	1.64437	0.0181683	1.27057	1.2942	1.8197	1.85353	0.00267062	1.34276	1.38038	2.18776	2.51189	1.33244e-05	1.48594	1.69044	3.16228	1.61436	0.00308775	1.22462	1.31826	1.77011
98	83.47	87.48	79.4	66.9	58.69	sp|P34932|HSP74_HUMAN	Heat shock 70 kDa protein 4 OS=Homo sapiens GN=HSPA4 PE=1 SV=4	HUMAN	79			1.43219	0.102903	1.19124	1.20226	1.55597	0.591562	0.0200822	1.21339	0.519996	0.717794	0.794328	0.301945	1.07647	0.731139	0.855067	0.630957	0.0661426	1.14815	0.554626	0.724436	0.564937	0.00637678	1.22462	0.47863	0.691831	0.691831	0.0549061	1.13763	0.608135	0.787046	0.554626	0.234283	1.1272	0.483059	0.625173
99	82.93	84.65	77.47	71.84	63.99	sp|P15311|EZRI_HUMAN	Ezrin OS=Homo sapiens GN=EZR PE=1 SV=4	HUMAN	74			0.60256	0.899328	1.22462	0.534564	0.737904	0.580764	0.355499	1.21339	0.529663	0.704693	0.501187	0.310058	1.23595	0.448745	0.619441	2.77971	7.63376e-08	1.33045	2.0893	3.80189	2.67917	1.09773e-06	1.34276	1.99526	3.69828	2.35505	3.91373e-06	1.30617	1.80302	3.16228	1.19124	3.63093e-05	1.13763	1.04713	1.48594
100	82.35	83.03	76.5	68.73	57.61	sp|Q99460|PSMD1_HUMAN	26S proteasome non-ATPase regulatory subunit 1 OS=Homo sapiens GN=PSMD1 PE=1 SV=2	HUMAN	83			1.1695	0.226799	1.10662	1.05682	1.28233	0.679204	0.0742445	1.10662	0.597035	0.751623	0.912011	0.840775	1.0666	0.855067	0.972747	1.13763	0.728808	1.09648	1.03753	1.22462	1.15878	0.666399	1.08643	1.0666	1.23595	1.15878	0.222436	1.07647	1.07647	1.23595	1.04713	0.14125	1.0666	0.981748	1.1272
101	82.14	85.26	57.12	47.57	42.25	sp|Q14203|DCTN1_HUMAN	Dynactin subunit 1 OS=Homo sapiens GN=DCTN1 PE=1 SV=3	HUMAN	51			0.751623	0.633148	1.19124	0.608135	0.895365	0.57544	0.0592287	1.40605	0.465586	0.809096	0.613762	0.28075	1.30617	0.49204	0.801678	1.22462	0.573344	1.1272	1.08643	1.40605	1.31826	0.251003	1.1695	1.1272	1.59956	1.28233	0.309535	1.18032	1.08643	1.48594	1.15878	0.318699	1.11686	1.03753	1.43219
102	82.06	82.5	71.49	63.64	54.65	sp|P49588|SYAC_HUMAN	Alanyl-tRNA synthetase, cytoplasmic OS=Homo sapiens GN=AARS PE=1 SV=2	HUMAN	70			1.55597	0.119831	1.21339	1.28233	1.7378	0.698232	0.126578	1.07647	0.654636	0.751623	0.928966	0.839226	1.0666	0.824138	0.990832	1.19124	0.242939	1.08643	1.09648	1.30617	1.34276	0.386127	1.13763	1.18032	1.45881	1.22462	0.174548	1.09648	1.11686	1.33045	1.10662	0.11577	1.07647	1.02802	1.22462
103	81.34	81.41	60.2	52.78	45.37	sp|P19367|HXK1_HUMAN	Hexokinase-1 OS=Homo sapiens GN=HK1 PE=1 SV=3	HUMAN	62			0.648634	0.621242	1.22462	0.559758	0.794328	1.21339	0.26899	1.19124	1.01859	1.38038	1.44544	0.0401599	1.21339	1.19124	1.61436	1.64437	0.0256259	1.2942	1.27057	1.94089	2.01372	0.0026041	1.36773	1.47231	2.53513	2.35505	0.00037311	1.45881	1.61436	2.85759	1.6293	0.0105951	1.22462	1.33045	1.88799
104	81.08	84.87	64.82	48.83	38.19	sp|Q7L2E3|DHX30_HUMAN	Putative ATP-dependent RNA helicase DHX30 OS=Homo sapiens GN=DHX30 PE=1 SV=1	HUMAN	52			0.937562	0.884331	1.10662	0.855067	1.03753	0.963829	0.874876	1.09648	0.879023	1.05682	1.00925	0.535709	1.09648	0.92045	1.10662	0.570164	0.0146354	1.35519	0.49204	0.772681	0.405509	0.000296162	1.61436	0.328095	0.654636	0.474242	0.000400326	1.44544	0.390841	0.685488	0.405509	4.65277e-05	1.45881	0.334195	0.591562
105	81.01	81.95	76.36	69.13	64.61	sp|P02545|LMNA_HUMAN	Prelamin-A/C OS=Homo sapiens GN=LMNA PE=1 SV=1	HUMAN	81			0.346737	0.0281059	1.45881	0.30761	0.505825	1.6293	0.0333791	1.31826	1.23595	2.18776	1.69044	0.0583194	1.44544	1.1695	2.18776	3.56451	3.19388e-10	1.7378	2.05116	5.86138	3.83707	1.01974e-09	1.8197	2.10863	6.48634	4.74242	1.33005e-13	1.85353	2.55859	7.65597	4.52898	4.33875e-13	1.83654	2.46604	7.51623
106	80.81	81.43	41.52	33.15	24.42	sp|P24928|RPB1_HUMAN	DNA-directed RNA polymerase II subunit RPB1 OS=Homo sapiens GN=POLR2A PE=1 SV=2	HUMAN	43			0.972747	0.604905	1.13763	0.847227	1.10662	0.77983	0.724528	1.13763	0.698232	0.887156	1.24738	0.0890714	1.10662	1.1272	1.39316	0.981748	0.830366	1.10662	0.879023	1.08643	1.01859	0.732795	1.1272	0.903649	1.14815	0.717794	0.21007	1.20226	0.630957	0.862979	0.60256	0.0178802	1.35519	0.515229	0.816582
107	80.54	81.15	60.03	51.45	43.88	sp|Q9P2J5|SYLC_HUMAN	Leucyl-tRNA synthetase, cytoplasmic OS=Homo sapiens GN=LARS PE=1 SV=2	HUMAN	49			0.92045	0.912267	1.08643	0.83946	1	0.787046	0.158813	1.1272	0.672977	0.887156	0.772681	0.152445	1.10662	0.666807	0.855067	0.440555	0.000194797	1.31826	0.30479	0.580764	0.387258	7.25548e-06	1.47231	0.275423	0.570164	0.60256	0.0115124	1.21339	0.436516	0.731139	0.394457	0.000202394	1.45881	0.296483	0.57544
108	80.4	83.91	47.88	31.62	22.04	sp|A6NHR9|SMHD1_HUMAN	Structural maintenance of chromosomes flexible hinge domain-containing protein 1 OS=Homo sapiens GN=SMCHD1 PE=1 SV=2	HUMAN	44			0.630957	0.0656496	1.31826	0.539511	0.831764	1.09648	0.424481	1.11686	0.981748	1.24738	1.07647	0.288718	1.1272	0.954993	1.23595	0.505825	0.00208725	1.40605	0.376704	0.711214	0.436516	0.0256459	1.45881	0.328095	0.636796	1	0.572297	1.10662	0.903649	1.11686	0.519996	0.240183	1.36773	0.420727	0.711214
109	79.79	81.57	61.66	54.05	46.15	sp|Q9H0A0|NAT10_HUMAN	N-acetyltransferase 10 OS=Homo sapiens GN=NAT10 PE=1 SV=2	HUMAN	69			0.787046	0.566558	1.1272	0.704693	0.887156	0.990832	0.981562	1.08643	0.912011	1.07647	1.25893	0.0144045	1.10662	1.13763	1.43219	0.608135	0.035042	1.20226	0.529663	0.731139	0.642688	0.144114	1.21339	0.570164	0.77983	0.724436	0.155499	1.14815	0.648634	0.831764	0.383707	0.00204458	1.30617	0.313329	0.501187
110	79.75	83.39	52.82	43.18	35.12	sp|Q15021|CND1_HUMAN	Condensin complex subunit 1 OS=Homo sapiens GN=NCAPD2 PE=1 SV=3	HUMAN	43			1.11686	0.673241	1.10662	1.00925	1.23595	0.679204	0.0370202	1.19124	0.57544	0.809096	0.765597	0.0554389	1.15878	0.679204	0.887156	0.428549	1.16087e-05	1.41906	0.334195	0.608135	0.487529	0.000247413	1.38038	0.405509	0.672977	0.60256	0.00446821	1.19124	0.505825	0.717794	0.457088	0.000253326	1.25893	0.349945	0.57544
6984	79.75	83.39	52.82	43.18	35.12	sp|Q15021|CND1_HUMAN	Condensin complex subunit 1 OS=Homo sapiens GN=NCAPD2 PE=1 SV=3	HUMAN	43			1.11686	0.673241	1.10662	1.00925	1.23595	0.679204	0.0370202	1.19124	0.57544	0.809096	0.765597	0.0554389	1.15878	0.679204	0.887156	0.428549	1.16087e-05	1.41906	0.334195	0.608135	0.487529	0.000247413	1.38038	0.405509	0.672977	0.60256	0.00446821	1.19124	0.505825	0.717794	0.457088	0.000253326	1.25893	0.349945	0.57544
111	79.44	82.15	85.61	78.42	71.4	sp|P17987|TCPA_HUMAN	T-complex protein 1 subunit alpha OS=Homo sapiens GN=TCP1 PE=1 SV=1	HUMAN	73			1.20226	0.681031	1.10662	1.08643	1.28233	0.630957	0.0163556	1.14815	0.57544	0.724436	0.870964	0.262031	1.05682	0.816582	0.92045	0.77983	0.0201251	1.05682	0.731139	0.824138	0.698232	0.026211	1.14815	0.636796	0.801678	0.895365	0.0934489	1.0666	0.83946	0.954993	0.505825	0.0107159	1.27057	0.428549	0.642688
112	79.18	100.52	47.15	32.34	21.38	sp|O15020|SPTN2_HUMAN	Spectrin beta chain, brain 2 OS=Homo sapiens GN=SPTBN2 PE=1 SV=3	HUMAN	55			0.809096	0.0874549	1.19124	0.711214	0.963829	1.19124	0.0120794	1.1272	1.05682	1.39316	1.01859	0.0716529	1.11686	0.912011	1.14815	0.554626	0.00017274	1.45881	0.394457	0.809096	0.654636	0.0156443	1.31826	0.529663	0.862979	0.731139	0.0174669	1.24738	0.60256	0.912011	0.654636	0.0805475	1.25893	0.524807	0.824138
113	79.15	79.83	80.74	75.82	60.25	sp|P13010|XRCC5_HUMAN	X-ray repair cross-complementing protein 5 OS=Homo sapiens GN=XRCC5 PE=1 SV=3	HUMAN	67			1.19124	0.72034	1.09648	1.08643	1.28233	0.765597	0.105556	1.09648	0.704693	0.83946	1.20226	0.435418	1.09648	1.09648	1.31826	0.801678	0.0740208	1.0666	0.758578	0.855067	0.672977	0.145492	1.15878	0.60256	0.77983	0.972747	0.290579	1.04713	0.92045	1.01859	0.394457	0.00141766	1.23595	0.349945	0.487529
114	78.97	79.14	69.18	54.84	51.32	sp|O43143|DHX15_HUMAN	Putative pre-mRNA-splicing factor ATP-dependent RNA helicase DHX15 OS=Homo sapiens GN=DHX15 PE=1 SV=2	HUMAN	72			1.21339	0.108422	1.07647	1.1272	1.2942	0.824138	0.854242	1.10662	0.758578	0.912011	1.18032	0.144301	1.0666	1.10662	1.24738	0.444631	0.0127242	1.30617	0.380189	0.580764	0.405509	0.00553023	1.36773	0.331131	0.554626	0.654636	0.151309	1.15878	0.524807	0.758578	0.49204	0.0888819	1.25893	0.413047	0.619441
115	78.89	78.81	64.05	56.08	44.71	sp|P11387|TOP1_HUMAN	DNA topoisomerase 1 OS=Homo sapiens GN=TOP1 PE=1 SV=2	HUMAN	60			0.787046	0.407005	1.07647	0.744732	0.847227	0.879023	0.429513	1.0666	0.824138	0.937562	1.92309	0.000254207	1.21339	1.58489	2.26986	1.1695	0.321013	1.0666	1.09648	1.25893	1.35519	0.25318	1.11686	1.21339	1.49968	1.21339	0.532901	1.07647	1.1272	1.28233	0.465586	0.157579	1.27057	0.428549	0.591562
116	78.78	82.77	53	41.75	33.06	sp|O60306|AQR_HUMAN	Intron-binding protein aquarius OS=Homo sapiens GN=AQR PE=1 SV=4	HUMAN	44			0.787046	0.165995	1.15878	0.685488	0.912011	0.704693	0.519297	1.21339	0.625173	0.855067	1.07647	0.286583	1.11686	0.963829	1.23595	0.912011	0.647761	1.11686	0.816582	1.01859	0.758578	0.236123	1.15878	0.679204	0.879023	1.01859	0.495679	1.10662	0.92045	1.1272	0.717794	0.294989	1.28233	0.613762	0.92045
117	78.49	81.48	64.32	59.16	51.68	sp|Q9H0D6|XRN2_HUMAN	5'-3' exoribonuclease 2 OS=Homo sapiens GN=XRN2 PE=1 SV=1	HUMAN	52			1.18032	0.630118	1.07647	1.09648	1.27057	1.15878	0.566211	1.09648	1.05682	1.25893	1.45881	0.0324377	1.15878	1.25893	1.58489	0.654636	0.149978	1.25893	0.534564	0.824138	0.831764	0.472578	1.09648	0.744732	0.912011	0.847227	0.80233	1.14815	0.691831	0.972747	0.549541	0.0110645	1.20226	0.448745	0.660693
118	78.44	78.57	69.19	61.51	55.73	sp|P43243|MATR3_HUMAN	Matrin-3 OS=Homo sapiens GN=MATR3 PE=1 SV=2	HUMAN	86			0.972747	0.455196	1.08643	0.912011	1.05682	1.0666	0.425523	1.05682	1.00925	1.13763	2.22844	0.000829596	1.30617	1.70608	2.96483	1.07647	0.526803	1.08643	0.990832	1.20226	1.48594	0.334376	1.18032	1.25893	1.77011	1.1695	0.775075	1.0666	1.09648	1.2942	0.937562	0.562971	1.10662	0.879023	1.03753
119	77.98	79.54	77.21	72.4	61.4	sp|P13667|PDIA4_HUMAN	Protein disulfide-isomerase A4 OS=Homo sapiens GN=PDIA4 PE=1 SV=2	HUMAN	75			0.981748	0.259883	1.00925	0.972747	0.990832	1.01859	0.21031	1.00925	1.00925	1.02802	1.02802	0.000322712	1.00925	1.01859	1.03753	1.03753	0.000546681	1.00925	1.02802	1.04713	1.04713	8.683e-05	1.00925	1.03753	1.05682	1.0666	1.05818e-06	1.00925	1.05682	1.07647	1.04713	2.10052e-05	1.00925	1.03753	1.05682
120	77.75	78.25	85.28	81.39	77.06	sp|P68104|EF1A1_HUMAN	Elongation factor 1-alpha 1 OS=Homo sapiens GN=EEF1A1 PE=1 SV=1	HUMAN	169			1.02802	0.000756427	1	1.02802	1.02802	0.92045	1.95679e-06	1	0.92045	0.92045	0.954993	0.0191792	1	0.954993	0.954993	0.954993	0.0233407	1	0.954993	0.954993	0.946237	0.0151994	1	0.946237	0.946237	0.92045	1.06687e-06	1	0.92045	0.92045	0.937562	0.000484949	1	0.937562	0.937562
121	77.55	79.17	75.1	68.71	57.73	sp|Q9NR30|DDX21_HUMAN	Nucleolar RNA helicase 2 OS=Homo sapiens GN=DDX21 PE=1 SV=5	HUMAN	62			1.10662	0.491536	1.05682	1.04713	1.1695	0.879023	0.309865	1.05682	0.816582	0.928966	1.34276	0.0172735	1.07647	1.24738	1.43219	0.353183	1.11569e-06	1.47231	0.224905	0.519996	0.380189	8.05744e-06	1.44544	0.244343	0.549541	0.325087	1.79148e-08	1.55597	0.194089	0.505825	0.194089	4.76076e-10	1.7378	0.121339	0.337287
122	77.47	77.7	86.28	82.78	74.32	sp|P13796|PLSL_HUMAN	Plastin-2 OS=Homo sapiens GN=LCP1 PE=1 SV=6	HUMAN	100			1.00925	0.0108166	1.00925	1	1.01859	0.954993	0.00389109	1.00925	0.946237	0.963829	0.963829	0.34893	1.00925	0.954993	0.972747	1	0.115414	1.00925	0.990832	1.00925	1.00925	0.0298757	1.00925	1	1.01859	0.981748	0.944204	1.00925	0.972747	0.990832	1	0.124937	1.00925	0.990832	1.00925
123	76.87	78.01	69.34	65.87	63.11	sp|Q13263|TIF1B_HUMAN	Transcription intermediary factor 1-beta OS=Homo sapiens GN=TRIM28 PE=1 SV=5	HUMAN	73			1.23595	0.650722	1.08643	1.13763	1.41906	1.2942	0.418013	1.09648	1.18032	1.39316	2.37684	0.00107576	1.33045	1.78649	3.01995	0.870964	0.347914	1.09648	0.787046	0.954993	0.630957	0.0596489	1.20226	0.57544	0.758578	1.94089	0.198925	1.25893	1.5417	2.24905	1.23595	0.362787	1.1272	1.09648	1.43219
124	76.78	79.31	36.81	26.9	19.7	sp|Q5UIP0|RIF1_HUMAN	Telomere-associated protein RIF1 OS=Homo sapiens GN=RIF1 PE=1 SV=2	HUMAN	40			0.92045	0.314281	1.10662	0.831764	1.01859	1.07647	0.709198	1.10662	0.972747	1.19124	1.5417	0.0331132	1.19124	1.2942	1.88799	0.356451	1.26767e-07	1.59956	0.212814	0.570164	0.293765	3.2935e-07	1.77011	0.127057	0.519996	0.642688	7.68622e-05	1.19124	0.501187	0.765597	0.440555	8.52017e-07	1.41906	0.277971	0.625173
125	76.52	77.17	60.33	45.97	40.54	sp|Q7L014|DDX46_HUMAN	Probable ATP-dependent RNA helicase DDX46 OS=Homo sapiens GN=DDX46 PE=1 SV=2	HUMAN	47			1.23595	0.188325	1.1272	1.09648	1.43219	1.1695	0.440463	1.10662	1.05682	1.30617	1.5417	0.000347177	1.19124	1.2942	1.83654	0.731139	0.142591	1.20226	0.591562	0.879023	0.862979	0.503698	1.13763	0.765597	0.981748	1.08643	0.221682	1.09648	0.990832	1.20226	1.30617	0.0569108	1.14815	1.13763	1.51356
126	76.41	79.39	42.32	31.28	24.95	sp|Q14669|TRIPC_HUMAN	Probable E3 ubiquitin-protein ligase TRIP12 OS=Homo sapiens GN=TRIP12 PE=1 SV=1	HUMAN	45			1	0.625968	1.11686	0.895365	1.11686	0.564937	0.134167	1.1272	0.483059	0.636796	0.787046	0.565388	1.09648	0.691831	0.862979	1.08643	0.160692	1.09648	0.990832	1.20226	1.14815	0.370986	1.1272	1.01859	1.27057	0.672977	0.0222968	1.1272	0.554626	0.758578	0.474242	0.0356188	1.21339	0.401791	0.57544
127	76.02	78.17	89.45	79.47	72.5	sp|P26599|PTBP1_HUMAN	Polypyrimidine tract-binding protein 1 OS=Homo sapiens GN=PTBP1 PE=1 SV=1	HUMAN	119			0.981748	0.963397	1.10662	0.903649	1.08643	0.855067	0.274951	1.09648	0.772681	0.937562	1.52757	0.051818	1.15878	1.31826	1.85353	0.831764	0.207457	1.10662	0.751623	0.92045	0.597035	0.0941544	1.1695	0.539511	0.698232	1.04713	0.925219	1.10662	0.946237	1.1695	0.685488	0.172239	1.11686	0.630957	0.765597
128	75.95	84.89	63	42.31	29.06	sp|Q15075|EEA1_HUMAN	Early endosome antigen 1 OS=Homo sapiens GN=EEA1 PE=1 SV=2	HUMAN	57			0.816582	0.471805	1.1695	0.654636	0.954993	1.34276	0.0587992	1.20226	1.11686	1.52757	1.04713	0.633752	1.11686	0.937562	1.1695	1.40605	0.0320632	1.24738	1.1272	1.64437	1.31826	0.0050923	1.19124	1.10662	1.5417	1.14815	0.441856	1.1695	0.981748	1.30617	1.10662	0.234763	1.1272	0.981748	1.23595
129	75.57	80.98	66.4	51.42	37.38	sp|Q00341|VIGLN_HUMAN	Vigilin OS=Homo sapiens GN=HDLBP PE=1 SV=2	HUMAN	49			1.07647	0.885755	1.10662	0.972747	1.21339	0.672977	0.326035	1.19124	0.613762	0.801678	1.05682	0.633117	1.08643	0.972747	1.13763	1.27057	0.258175	1.14815	1.10662	1.45881	1.36773	0.0600528	1.13763	1.20226	1.59956	0.862979	0.439958	1.08643	0.801678	0.937562	0.816582	0.778397	1.10662	0.751623	0.903649
130	75.56	75.45	83.76	80.11	72.63	sp|P50990|TCPQ_HUMAN	T-complex protein 1 subunit theta OS=Homo sapiens GN=CCT8 PE=1 SV=4	HUMAN	71			1.28233	0.320595	1.13763	1.1272	1.41906	0.440555	0.00431118	1.33045	0.366438	0.586138	0.765597	0.339166	1.09648	0.724436	0.83946	0.679204	0.113802	1.14815	0.630957	0.77983	0.648634	0.0477784	1.14815	0.580764	0.744732	0.685488	0.0684865	1.1695	0.591562	0.801678	0.597035	0.112827	1.15878	0.515229	0.691831
131	75.54	79.1	62.46	50.61	41.49	sp|O00159|MYO1C_HUMAN	Myosin-Ic OS=Homo sapiens GN=MYO1C PE=1 SV=4	HUMAN	54			0.608135	0.520283	1.36773	0.524807	0.831764	1.41906	0.015418	1.15878	1.22462	1.5417	1.19124	0.184914	1.1272	1.05682	1.30617	1.70608	0.00159943	1.28233	1.33045	1.97697	1.64437	0.0593891	1.30617	1.25893	1.85353	1.92309	0.00052713	1.30617	1.47231	2.31206	1.40605	0.01203	1.19124	1.18032	1.59956
132	75.19	75.35	93.03	91.01	89.44	sp|P68371|TBB2C_HUMAN	Tubulin beta-2C chain OS=Homo sapiens GN=TUBB2C PE=1 SV=1	HUMAN	200			0.83946	0.249397	1.14815	0.724436	0.963829	0.794328	0.182175	1.22462	0.666807	0.972747	0.772681	0.669888	1.14815	0.685488	0.887156	0.92045	0.770197	1.11686	0.787046	1.02802	0.937562	0.357876	1.10662	0.83946	1.03753	1.35519	0.107414	1.13763	1.19124	1.48594	0.946237	0.0497159	1.1272	0.847227	1.0666
133	74.44	75.44	38.3	32.53	24.22	sp|P52948|NUP98_HUMAN	Nuclear pore complex protein Nup98-Nup96 OS=Homo sapiens GN=NUP98 PE=1 SV=4	HUMAN	43			0.711214	0.0244248	1.1695	0.559758	0.831764	1.1272	0.231782	1.15878	0.972747	1.2942	1.13763	0.704289	1.15878	0.981748	1.31826	0.92045	0.519488	1.1272	0.801678	1.03753	0.981748	0.848616	1.1272	0.862979	1.10662	0.903649	0.400724	1.1272	0.77983	1.01859	0.824138	0.513934	1.1272	0.731139	0.928966
134	74.31	74.64	86.56	79.19	66.48	sp|P31948|STIP1_HUMAN	Stress-induced-phosphoprotein 1 OS=Homo sapiens GN=STIP1 PE=1 SV=1	HUMAN	60			1.2942	0.0420869	1.05682	1.22462	1.36773	0.42462	0.00112371	1.20226	0.359749	0.510505	0.787046	0.55782	1.0666	0.744732	0.83946	0.570164	0.0604188	1.19124	0.457088	0.679204	0.613762	0.0228638	1.19124	0.505825	0.731139	0.559758	0.016575	1.21339	0.469894	0.679204	0.642688	0.377542	1.10662	0.570164	0.711214
135	74.18	76.1	67.16	57.39	50.18	sp|Q8N1F7|NUP93_HUMAN	Nuclear pore complex protein Nup93 OS=Homo sapiens GN=NUP93 PE=1 SV=2	HUMAN	49			1.01859	0.766706	1.09648	0.928966	1.11686	0.60256	0.0619856	1.28233	0.539511	0.772681	1.20226	0.111731	1.14815	1.04713	1.45881	0.758578	0.222192	1.1272	0.691831	0.855067	0.870964	0.758797	1.14815	0.787046	1	0.972747	0.8834	1.09648	0.887156	1.0666	0.731139	0.620816	1.11686	0.654636	0.816582
136	74.13	76.26	60.74	47.09	39.64	sp|Q9Y5B9|SP16H_HUMAN	FACT complex subunit SPT16 OS=Homo sapiens GN=SUPT16H PE=1 SV=1	HUMAN	64			1.1695	0.0594595	1.09648	1.0666	1.2942	1.07647	0.189069	1.09648	0.981748	1.21339	1.40605	0.00908391	1.1272	1.24738	1.75388	0.42462	0.0108851	1.51356	0.349945	0.642688	0.515229	0.00719395	1.36773	0.420727	0.704693	1.15878	0.113336	1.09648	1.05682	1.30617	0.946237	0.539761	1.10662	0.887156	1.04713
137	74.12	75.08	52.66	40.22	30.27	sp|Q9NTI5|PDS5B_HUMAN	Sister chromatid cohesion protein PDS5 homolog B OS=Homo sapiens GN=PDS5B PE=1 SV=1	HUMAN	43			0.870964	0.891447	1.1272	0.772681	0.981748	1.21339	0.218079	1.1272	1.07647	1.38038	1.58489	0.000862717	1.24738	1.27057	1.83654	0.946237	0.709074	1.1272	0.847227	1.0666	0.903649	0.964824	1.14815	0.794328	1.03753	1.57036	0.0323606	1.24738	1.25893	1.80302	0.737904	0.780279	1.15878	0.648634	0.855067
138	74.09	75.32	87.9	81.94	75.6	sp|P34897|GLYM_HUMAN	Serine hydroxymethyltransferase, mitochondrial OS=Homo sapiens GN=SHMT2 PE=1 SV=3	HUMAN	105			1.03753	0.495594	1.0666	0.972747	1.08643	1.24738	0.240477	1.08643	1.14815	1.33045	1.7378	0.00446182	1.21339	1.43219	1.90546	0.744732	0.544544	1.09648	0.660693	0.816582	0.724436	0.487506	1.13763	0.642688	0.824138	1.51356	0.0769704	1.14815	1.31826	1.59956	0.831764	0.896869	1.0666	0.77983	0.887156
139	73.72	74.19	38.67	31.74	25.65	sp|P51610|HCFC1_HUMAN	Host cell factor 1 OS=Homo sapiens GN=HCFC1 PE=1 SV=2	HUMAN	50			1.31826	0.0743982	1.19124	1.10662	1.52757	1.03753	0.301996	1.09648	0.946237	1.1272	1.78649	0.00100009	1.35519	1.31826	2.37684	1.22462	0.0651727	1.1272	1.08643	1.47231	1.33045	0.0598288	1.19124	1.11686	1.51356	1.33045	0.0351433	1.1695	1.13763	1.52757	1.43219	0.00781882	1.19124	1.20226	1.72187
140	73.71	74.9	81.25	69.7	65.08	sp|O00429|DNM1L_HUMAN	Dynamin-1-like protein OS=Homo sapiens GN=DNM1L PE=1 SV=2	HUMAN	61			1.28233	0.307198	1.10662	1.15878	1.38038	0.510505	0.00736332	1.20226	0.469894	0.613762	0.654636	0.0826338	1.18032	0.597035	0.772681	0.946237	0.770326	1.08643	0.862979	1.02802	0.981748	0.892124	1.08643	0.870964	1.0666	0.928966	0.655372	1.08643	0.855067	1.00925	0.794328	0.79407	1.07647	0.737904	0.855067
141	73.65	75.01	70.75	62.26	55.19	sp|P11940|PABP1_HUMAN	Polyadenylate-binding protein 1 OS=Homo sapiens GN=PABPC1 PE=1 SV=2	HUMAN	66			1.04713	0.350649	1.0666	0.981748	1.11686	0.49204	0.00170883	1.34276	0.37325	0.660693	0.77983	0.146774	1.11686	0.685488	0.870964	0.580764	0.00503579	1.24738	0.465586	0.724436	0.57544	0.000384729	1.23595	0.461318	0.711214	0.383707	1.67351e-05	1.47231	0.280543	0.564937	0.334195	0.000267649	1.58489	0.233346	0.529663
142	73.35	130.64	83.64	81.67	73.33	sp|O43707|ACTN4_HUMAN	Alpha-actinin-4 OS=Homo sapiens GN=ACTN4 PE=1 SV=2	HUMAN	131			0.895365	0.604761	1.07647	0.816582	0.963829	0.92045	0.754126	1.10662	0.824138	1.01859	1.05682	0.766991	1.0666	0.990832	1.14815	1.69044	0.00060375	1.27057	1.33045	2.12814	1.99526	0.00016184	1.35519	1.47231	2.58226	1.44544	0.0770793	1.21339	1.19124	1.7378	1.39316	0.139554	1.19124	1.1695	1.65959
143	73.26	87.57	33	14.45	6.681	sp|Q8WXH0|SYNE2_HUMAN	Nesprin-2 OS=Homo sapiens GN=SYNE2 PE=1 SV=3	HUMAN	46			0.625173	0.0883515	1.18032	0.544503	0.737904	1.25893	0.0214733	1.20226	1.04713	1.48594	1.19124	0.426663	1.21339	0.981748	1.41906	1.18032	0.392321	1.1695	1.00925	1.39316	1.01859	0.855304	1.14815	0.887156	1.15878	1.20226	0.162877	1.20226	1	1.44544	1.13763	0.281396	1.23595	0.92045	1.36773
144	73.18	74.26	93.22	90.86	84.37	sp|P07355|ANXA2_HUMAN	Annexin A2 OS=Homo sapiens GN=ANXA2 PE=1 SV=2	HUMAN	154			0.972747	0.0790835	1	0.972747	0.972747	0.981748	0.458544	1	0.981748	0.981748	0.963829	0.00974819	1	0.963829	0.963829	1.08643	1.44182e-10	1	1.08643	1.08643	1.10662	8.63135e-09	1	1.10662	1.10662	1.02802	0.000563598	1	1.02802	1.02802	1.02802	1.48185e-05	1	1.02802	1.02802
145	72.73	75.17	78.65	71.76	65.85	sp|P12956|XRCC6_HUMAN	X-ray repair cross-complementing protein 6 OS=Homo sapiens GN=XRCC6 PE=1 SV=2	HUMAN	82			1.07647	0.672242	1.05682	1.01859	1.1272	0.711214	0.155804	1.13763	0.625173	0.809096	1.27057	0.115851	1.09648	1.15878	1.35519	0.679204	0.0678289	1.15878	0.597035	0.787046	0.613762	0.010752	1.20226	0.539511	0.737904	0.654636	0.0819132	1.15878	0.564937	0.758578	0.510505	0.024429	1.15878	0.436516	0.591562
146	72.72	73.36	57.51	44.61	35.28	sp|Q92896|GSLG1_HUMAN	Golgi apparatus protein 1 OS=Homo sapiens GN=GLG1 PE=1 SV=2	HUMAN	39			0.83946	0.540748	1.1272	0.751623	0.946237	0.505825	0.0295088	1.40605	0.401791	0.711214	0.809096	0.228232	1.18032	0.717794	0.954993	1.6293	0.000245115	1.20226	1.35519	2.10863	1.52757	0.000184185	1.19124	1.28233	1.94089	0.549541	0.042983	1.39316	0.452898	0.765597	0.685488	0.129668	1.21339	0.580764	0.831764
147	72.71	74.92	71.25	55.05	50.3	sp|Q14566|MCM6_HUMAN	DNA replication licensing factor MCM6 OS=Homo sapiens GN=MCM6 PE=1 SV=1	HUMAN	47			0.972747	0.755249	1.07647	0.903649	1.04713	0.554626	6.75673e-05	1.24738	0.474242	0.691831	0.648634	0.00451281	1.14815	0.580764	0.744732	0.233346	2.06974e-11	1.67494	0.172187	0.390841	0.313329	1.41925e-08	1.49968	0.242103	0.469894	0.401791	2.15333e-07	1.36773	0.331131	0.549541	0.487529	4.33487e-05	1.28233	0.42462	0.625173
148	72.65	72.95	72.83	68.43	63.27	sp|P54886|P5CS_HUMAN	Delta-1-pyrroline-5-carboxylate synthase OS=Homo sapiens GN=ALDH18A1 PE=1 SV=2	HUMAN	81			0.972747	0.351653	1.00925	0.963829	0.981748	0.981748	0.962966	1.00925	0.972747	0.990832	1	0.0648808	1.00925	0.990832	1.00925	0.972747	0.906031	1.00925	0.963829	0.981748	0.963829	0.129917	1.00925	0.954993	0.972747	0.990832	0.228629	1.00925	0.981748	1	0.946237	0.185345	1.00925	0.937562	0.954993
149	72.62	72.87	66.05	56.91	47.44	sp|P55786|PSA_HUMAN	Puromycin-sensitive aminopeptidase OS=Homo sapiens GN=NPEPPS PE=1 SV=2	HUMAN	48			1	0.16567	1.07647	0.928966	1.07647	0.510505	0.0723455	1.27057	0.465586	0.648634	0.608135	0.103417	1.28233	0.519996	0.77983	0.954993	0.221416	1.1272	0.887156	1.07647	0.895365	0.514924	1.07647	0.83946	0.963829	0.758578	0.977941	1.14815	0.704693	0.870964	0.691831	0.400824	1.20226	0.619441	0.831764
150	72.5	73.18	90.02	82.07	74.12	sp|P48643|TCPE_HUMAN	T-complex protein 1 subunit epsilon OS=Homo sapiens GN=CCT5 PE=1 SV=1	HUMAN	74			1.14815	0.784756	1.05682	1.08643	1.21339	0.416869	0.00906936	1.18032	0.376704	0.49204	0.92045	0.550996	1.04713	0.870964	0.963829	0.758578	0.246369	1.07647	0.704693	0.816582	0.636796	0.0905556	1.10662	0.549541	0.704693	0.765597	0.123874	1.09648	0.711214	0.83946	0.564937	0.153762	1.08643	0.519996	0.613762
151	72.38	73.54	91.49	87.33	84.5	sp|P06576|ATPB_HUMAN	ATP synthase subunit beta, mitochondrial OS=Homo sapiens GN=ATP5B PE=1 SV=3	HUMAN	151			0.981748	0.557408	1.00925	0.972747	0.990832	1.01859	0.384426	1.00925	1.00925	1.02802	1.00925	0.214978	1.00925	1	1.01859	1.02802	0.0384149	1.00925	1.01859	1.03753	1.03753	0.0305995	1.00925	1.02802	1.04713	1.01859	0.159988	1.00925	1.00925	1.02802	0.990832	0.525991	1.00925	0.981748	1
152	72.15	80.32	29.23	15.97	10.16	sp|O95714|HERC2_HUMAN	E3 ubiquitin-protein ligase HERC2 OS=Homo sapiens GN=HERC2 PE=1 SV=2	HUMAN	48			0.794328	0.0355154	1.14815	0.691831	0.912011	0.704693	0.051277	1.20226	0.613762	0.847227	0.772681	0.0176428	1.14815	0.679204	0.887156	0.824138	0.0625692	1.14815	0.731139	0.946237	0.60256	0.000873336	1.28233	0.505825	0.772681	0.816582	0.25739	1.18032	0.704693	0.963829	0.559758	0.000373661	1.31826	0.47863	0.737904
153	72.15	72.42	47.79	38.6	32.28	sp|P52701|MSH6_HUMAN	DNA mismatch repair protein Msh6 OS=Homo sapiens GN=MSH6 PE=1 SV=2	HUMAN	40			1.27057	0.959206	1.11686	1.13763	1.48594	1.77011	0.032947	1.18032	1.49968	2.208	1.78649	0.0155253	1.19124	1.49968	2.31206	0.313329	0.00031873	1.41906	0.270396	0.444631	0.398107	0.0081458	1.43219	0.334195	0.570164	0.903649	0.358211	1.1272	0.794328	1.01859	0.660693	0.203651	1.13763	0.597035	0.751623
154	72.06	74.5	67.16	58.55	46.07	sp|P53618|COPB_HUMAN	Coatomer subunit beta OS=Homo sapiens GN=COPB1 PE=1 SV=3	HUMAN	42			0.672977	0.239297	1.11686	0.608135	0.751623	0.346737	0.00116901	1.51356	0.275423	0.524807	0.448745	0.0230395	1.35519	0.359749	0.608135	0.83946	0.756421	1.10662	0.751623	0.928966	0.717794	0.102918	1.18032	0.580764	0.847227	0.608135	0.0342623	1.23595	0.534564	0.751623	0.529663	0.0185381	1.30617	0.444631	0.691831
155	71.9	72.91	68.51	58.81	47.97	sp|P36776|LONM_HUMAN	Lon protease homolog, mitochondrial OS=Homo sapiens GN=LONP1 PE=1 SV=2	HUMAN	61			0.737904	0.313297	1.15878	0.619441	0.855067	1.09648	0.73377	1.07647	1.01859	1.21339	1.10662	0.0644672	1.0666	1.03753	1.19124	0.801678	0.72773	1.1272	0.737904	0.903649	1.33045	0.410164	1.09648	1.21339	1.43219	2.14783	0.000145768	1.23595	1.7378	2.63027	0.972747	0.269902	1.07647	0.903649	1.04713
156	71.83	74.79	45.5	26.49	16.38	sp|Q9BV73|CP250_HUMAN	Centrosome-associated protein CEP250 OS=Homo sapiens GN=CEP250 PE=1 SV=2	HUMAN	38			0.887156	0.844285	1.13763	0.772681	1.00925	1.13763	0.131671	1.14815	0.990832	1.28233	0.630957	0.0524772	1.27057	0.510505	0.801678	1.27057	0.0270815	1.19124	1.0666	1.48594	1.45881	0.00967251	1.23595	1.18032	1.80302	1.45881	0.0108921	1.2942	1.1272	1.77011	1.6293	0.00754863	1.30617	1.24738	1.94089
157	71.76	74.69	54.51	46.41	35.62	sp|Q5JTH9|RRP12_HUMAN	RRP12-like protein OS=Homo sapiens GN=RRP12 PE=1 SV=2	HUMAN	47			0.963829	0.240294	1.07647	0.895365	1.03753	0.972747	0.978549	1.08643	0.895365	1.05682	1.34276	0.0530235	1.08643	1.23595	1.48594	0.630957	0.206407	1.10662	0.534564	0.698232	0.636796	0.275836	1.1272	0.580764	0.717794	0.648634	0.196313	1.1272	0.554626	0.731139	0.469894	0.00952937	1.10662	0.409261	0.519996
158	71.69	79	78.98	73.01	65.77	sp|Q12931|TRAP1_HUMAN	Heat shock protein 75 kDa, mitochondrial OS=Homo sapiens GN=TRAP1 PE=1 SV=3	HUMAN	81			0.855067	0.740678	1.05682	0.801678	0.903649	1.30617	0.0642046	1.10662	1.18032	1.41906	1.55597	0.0132243	1.1695	1.33045	1.70608	0.457088	0.00847227	1.31826	0.394457	0.60256	0.515229	0.00488208	1.24738	0.469894	0.642688	1.22462	0.444203	1.07647	1.13763	1.2942	0.691831	0.157252	1.10662	0.648634	0.765597
159	71.61	74.63	89.31	81.78	74.26	sp|P30101|PDIA3_HUMAN	Protein disulfide-isomerase A3 OS=Homo sapiens GN=PDIA3 PE=1 SV=4	HUMAN	117			0.981748	0.405016	1.00925	0.972747	0.990832	0.990832	0.788064	1.00925	0.981748	1	1.00925	0.00632713	1.00925	1	1.01859	1.01859	0.00190201	1.00925	1.00925	1.02802	1.02802	0.000307879	1.00925	1.01859	1.03753	1.02802	0.000370671	1.00925	1.01859	1.03753	1.00925	0.00884882	1.00925	1	1.01859
160	71.45	74.12	94.48	88.01	81.29	sp|P00558|PGK1_HUMAN	Phosphoglycerate kinase 1 OS=Homo sapiens GN=PGK1 PE=1 SV=3	HUMAN	90			1.00925	0.274021	1.00925	1	1.01859	0.981748	0.953544	1.00925	0.972747	0.990832	0.972747	0.0287419	1.00925	0.963829	0.981748	1	0.374604	1.00925	0.990832	1.00925	0.963829	0.00390348	1.00925	0.954993	0.972747	0.990832	0.454284	1.00925	0.981748	1	0.990832	0.991829	1.00925	0.981748	1
161	71.32	71.69	81.93	76.35	75.68	sp|P31939|PUR9_HUMAN	Bifunctional purine biosynthesis protein PURH OS=Homo sapiens GN=ATIC PE=1 SV=3	HUMAN	50			0.981748	0.419286	1.05682	0.928966	1.03753	0.597035	0.0304084	1.1695	0.519996	0.698232	0.625173	0.0837282	1.13763	0.559758	0.711214	0.544503	0.0252462	1.25893	0.457088	0.685488	0.505825	0.00433042	1.24738	0.401791	0.630957	0.510505	0.0160971	1.20226	0.42462	0.613762	0.420727	0.00787408	1.28233	0.363078	0.539511
162	71.19	73.9	39.98	26.77	19.22	sp|Q13085|ACACA_HUMAN	Acetyl-CoA carboxylase 1 OS=Homo sapiens GN=ACACA PE=1 SV=2	HUMAN	38			0.928966	0.62745	1.1272	0.824138	1.04713	0.608135	0.00742584	1.31826	0.436516	0.801678	0.570164	0.000406618	1.35519	0.409261	0.772681	0.737904	0.158428	1.19124	0.642688	0.879023	0.625173	0.00730603	1.28233	0.469894	0.801678	0.625173	0.00107231	1.24738	0.496592	0.77983	0.428549	0.000592503	1.6293	0.316228	0.698232
163	71.05	74.99	82.25	74.74	67.41	sp|P20700|LMNB1_HUMAN	Lamin-B1 OS=Homo sapiens GN=LMNB1 PE=1 SV=2	HUMAN	58			0.465586	0.0753208	1.48594	0.380189	0.691831	1.5417	0.0176299	1.23595	1.24738	1.87068	1.11686	0.134385	1.09648	1.01859	1.22462	1.34276	0.0872018	1.19124	1.1272	1.57036	1.19124	0.296604	1.10662	1.07647	1.30617	1.41906	0.0857623	1.21339	1.1695	1.7378	1.34276	0.0852491	1.15878	1.15878	1.55597
164	70.68	75.65	64.33	53.91	44.99	sp|P78347|GTF2I_HUMAN	General transcription factor II-I OS=Homo sapiens GN=GTF2I PE=1 SV=2	HUMAN	42			0.963829	0.78777	1.08643	0.887156	1.04713	0.928966	0.335477	1.09648	0.83946	1.01859	1.45881	0.0082548	1.20226	1.21339	1.70608	0.636796	0.0013992	1.28233	0.496592	0.816582	0.666807	0.0037541	1.27057	0.539511	0.847227	0.691831	0.00383078	1.23595	0.529663	0.855067	0.597035	0.00532251	1.39316	0.452898	0.831764
165	70.64	75.36	67.82	57.8	50.12	sp|P25205|MCM3_HUMAN	DNA replication licensing factor MCM3 OS=Homo sapiens GN=MCM3 PE=1 SV=3	HUMAN	50			1.00925	0.870534	1.07647	0.937562	1.07647	0.60256	0.0679744	1.14815	0.534564	0.691831	0.580764	0.110057	1.20226	0.474242	0.698232	0.270396	3.93717e-05	1.34276	0.222844	0.363078	0.37325	0.00195963	1.30617	0.299226	0.487529	0.534564	0.0672017	1.21339	0.448745	0.648634	0.436516	0.00336223	1.21339	0.37325	0.529663
166	70.51	74.02	44.06	29.63	20.73	sp|Q8N201|INT1_HUMAN	Integrator complex subunit 1 OS=Homo sapiens GN=INTS1 PE=1 SV=2	HUMAN	44			0.831764	0.223553	1.18032	0.724436	0.981748	0.937562	0.263766	1.15878	0.824138	1.08643	0.912011	0.378857	1.13763	0.801678	1.03753	0.816582	0.0751296	1.19124	0.711214	0.972747	0.824138	0.14345	1.15878	0.711214	0.954993	1.14815	0.559967	1.14815	1	1.39316	0.613762	0.086706	1.2942	0.529663	0.794328
167	70.25	71.38	66.16	61.48	53.93	sp|O00571|DDX3X_HUMAN	ATP-dependent RNA helicase DDX3X OS=Homo sapiens GN=DDX3X PE=1 SV=3	HUMAN	64			1.11686	0.364414	1.0666	1.04713	1.19124	0.564937	0.00465199	1.20226	0.465586	0.679204	0.737904	0.2298	1.10662	0.672977	0.816582	0.564937	0.00211039	1.22462	0.474242	0.691831	0.461318	0.000127504	1.31826	0.353183	0.608135	0.346737	2.5629e-05	1.48594	0.263027	0.515229	0.340408	2.67566e-05	1.47231	0.275423	0.501187
168	70.2	72.38	66.56	53.79	43.3	sp|P33176|KINH_HUMAN	Kinesin-1 heavy chain OS=Homo sapiens GN=KIF5B PE=1 SV=1	HUMAN	54			1	0.465925	1.10662	0.903649	1.11686	0.685488	0.181886	1.13763	0.613762	0.77983	0.630957	0.150979	1.1695	0.564937	0.737904	0.990832	0.684662	1.15878	0.903649	1.14815	1.04713	0.445285	1.09648	0.954993	1.13763	1.18032	0.102379	1.13763	1.03753	1.33045	0.855067	0.273974	1.10662	0.772681	0.946237
169	70.02	72.36	81.15	76.23	71.82	sp|P30153|2AAA_HUMAN	Serine/threonine-protein phosphatase 2A 65 kDa regulatory subunit A alpha isoform OS=Homo sapiens GN=PPP2R1A PE=1 SV=4	HUMAN	66			0.847227	0.781696	1.07647	0.77983	0.912011	0.698232	0.572865	1.11686	0.630957	0.77983	0.608135	0.0367351	1.20226	0.529663	0.731139	0.887156	0.290612	1.10662	0.801678	0.981748	1.0666	0.702923	1.10662	0.963829	1.21339	0.794328	0.674908	1.1272	0.724436	0.895365	0.77983	0.501061	1.09648	0.711214	0.855067
170	69.93	70.12	63.04	57.32	51.72	sp|Q9Y678|COPG_HUMAN	Coatomer subunit gamma OS=Homo sapiens GN=COPG PE=1 SV=1	HUMAN	48			1.08643	0.260809	1.09648	0.990832	1.18032	0.704693	0.156215	1.09648	0.619441	0.772681	0.831764	0.232137	1.08643	0.737904	0.903649	0.954993	0.499006	1.10662	0.870964	1.05682	0.887156	0.837593	1.08643	0.816582	0.963829	0.912011	0.545366	1.08643	0.83946	0.990832	0.704693	0.625433	1.08643	0.642688	0.765597
171	69.86	71.73	66.42	49.31	39.43	sp|O94906|PRP6_HUMAN	Pre-mRNA-processing factor 6 OS=Homo sapiens GN=PRPF6 PE=1 SV=1	HUMAN	45			0.772681	0.608021	1.13763	0.704693	0.879023	0.758578	0.655723	1.1695	0.672977	0.887156	1.35519	0.0544146	1.18032	1.14815	1.61436	0.937562	0.897421	1.09648	0.862979	1.02802	1.0666	0.267017	1.09648	0.972747	1.15878	1.15878	0.165172	1.10662	1.04713	1.27057	0.954993	0.706182	1.08643	0.870964	1.03753
172	69.79	71.77	87.29	80.93	76.82	sp|P78371|TCPB_HUMAN	T-complex protein 1 subunit beta OS=Homo sapiens GN=CCT2 PE=1 SV=4	HUMAN	97			1.11686	0.350147	1.04713	1.0666	1.18032	0.401791	0.00298252	1.24738	0.349945	0.501187	0.679204	0.100942	1.10662	0.619441	0.751623	0.549541	0.0101965	1.18032	0.474242	0.648634	0.413047	0.00220946	1.27057	0.349945	0.524807	0.505825	0.00495553	1.20226	0.420727	0.608135	0.474242	0.0142583	1.23595	0.413047	0.586138
173	69.37	70.12	77.8	75.23	70.28	sp|P49368|TCPG_HUMAN	T-complex protein 1 subunit gamma OS=Homo sapiens GN=CCT3 PE=1 SV=4	HUMAN	80			1.1272	0.287794	1.05682	1.0666	1.20226	0.57544	0.0199358	1.15878	0.47863	0.666807	0.737904	0.52081	1.11686	0.654636	0.824138	0.816582	0.329819	1.0666	0.765597	0.870964	0.613762	0.0693008	1.1695	0.529663	0.717794	0.630957	0.0347501	1.15878	0.544503	0.731139	0.625173	0.123607	1.19124	0.544503	0.744732
174	69.27	70.06	74.61	65.53	57.89	sp|P02786|TFR1_HUMAN	Transferrin receptor protein 1 OS=Homo sapiens GN=TFRC PE=1 SV=2	HUMAN	60			1.09648	0.791648	1.0666	1.02802	1.1695	0.515229	0.0252337	1.27057	0.413047	0.654636	0.963829	0.620312	1.0666	0.912011	1.02802	0.711214	0.101359	1.1272	0.619441	0.801678	0.724436	0.354213	1.15878	0.642688	0.83946	0.401791	4.19529e-05	1.34276	0.288403	0.539511	0.226986	0.00304745	1.47231	0.180302	0.334195
175	69.2	70.54	57.38	47.14	34.55	sp|P27816|MAP4_HUMAN	Microtubule-associated protein 4 OS=Homo sapiens GN=MAP4 PE=1 SV=3	HUMAN	39			0.990832	0.995965	1.09648	0.903649	1.08643	0.758578	0.449741	1.20226	0.666807	0.912011	0.946237	0.869261	1.10662	0.862979	1.04713	1.19124	0.0505966	1.13763	1.04713	1.44544	1.22462	0.0839469	1.14815	1.0666	1.48594	0.855067	0.768323	1.11686	0.77983	0.954993	0.990832	0.205536	1.09648	0.912011	1.08643
176	69.14	69.42	53.47	44.06	39.7	sp|P22102|PUR2_HUMAN	Trifunctional purine biosynthetic protein adenosine-3 OS=Homo sapiens GN=GART PE=1 SV=1	HUMAN	50			1.10662	0.0409444	1.08643	1.01859	1.2942	0.660693	0.102515	1.1695	0.597035	0.772681	0.903649	0.613909	1.07647	0.831764	0.972747	0.529663	0.000549668	1.22462	0.398107	0.648634	0.363078	5.99842e-05	1.51356	0.251189	0.549541	0.666807	0.000388333	1.14815	0.49204	0.765597	0.337287	3.59884e-06	1.45881	0.267917	0.49204
177	68.99	74.18	76.06	68.79	59.55	sp|P54136|SYRC_HUMAN	Arginyl-tRNA synthetase, cytoplasmic OS=Homo sapiens GN=RARS PE=1 SV=2	HUMAN	55			0.912011	0.292765	1.08643	0.847227	0.990832	0.524807	0.0274981	1.24738	0.465586	0.654636	0.731139	0.235305	1.15878	0.672977	0.847227	0.685488	0.0659125	1.11686	0.630957	0.765597	0.619441	0.0976669	1.14815	0.544503	0.711214	0.711214	0.119501	1.14815	0.613762	0.816582	0.436516	0.0400805	1.31826	0.387258	0.57544
178	68.92	70.92	52.1	42.39	30.51	sp|Q9NTJ3|SMC4_HUMAN	Structural maintenance of chromosomes protein 4 OS=Homo sapiens GN=SMC4 PE=1 SV=2	HUMAN	46			0.937562	0.540166	1.09648	0.855067	1.02802	0.717794	0.0213069	1.21339	0.597035	0.870964	0.831764	0.52845	1.1272	0.751623	0.937562	0.534564	0.000354922	1.33045	0.448745	0.711214	0.570164	0.000793899	1.34276	0.474242	0.765597	0.816582	0.221895	1.13763	0.731139	0.928966	0.816582	0.835329	1.14815	0.737904	0.937562
179	68.9	71.67	81.77	79.01	70.72	sp|Q99832|TCPH_HUMAN	T-complex protein 1 subunit eta OS=Homo sapiens GN=CCT7 PE=1 SV=2	HUMAN	70			1.21339	0.30765	1.11686	1.08643	1.2942	0.448745	0.0113525	1.22462	0.390841	0.549541	0.809096	0.156326	1.05682	0.751623	0.855067	0.711214	0.221151	1.08643	0.648634	0.772681	0.570164	0.00882598	1.1695	0.487529	0.666807	0.717794	0.049379	1.07647	0.630957	0.772681	0.474242	0.0261509	1.21339	0.405509	0.57544
180	68.85	69.06	54.51	43.95	31.6	sp|P30876|RPB2_HUMAN	DNA-directed RNA polymerase II subunit RPB2 OS=Homo sapiens GN=POLR2B PE=1 SV=1	HUMAN	36			0.855067	0.844771	1.1272	0.744732	0.963829	0.580764	0.0400228	1.21339	0.505825	0.704693	0.981748	0.693525	1.10662	0.895365	1.08643	0.772681	0.590186	1.14815	0.60256	0.887156	0.758578	0.720343	1.1272	0.666807	0.855067	0.724436	0.0191556	1.11686	0.648634	0.809096	0.420727	0.00139092	1.40605	0.366438	0.591562
181	68.8	77.6	46.01	31.18	22.37	sp|O60287|NPA1P_HUMAN	Nucleolar pre-ribosomal-associated protein 1 OS=Homo sapiens GN=URB1 PE=1 SV=4	HUMAN	54			0.946237	0.72039	1.13763	0.824138	1.07647	1.22462	0.280142	1.15878	1.05682	1.40605	1.07647	0.44798	1.15878	0.928966	1.23595	0.691831	0.0701536	1.23595	0.591562	0.855067	0.630957	0.0930422	1.23595	0.505825	0.77983	0.972747	0.950412	1.1272	0.862979	1.09648	0.591562	0.109597	1.34276	0.483059	0.794328
182	68.62	69.83	63.17	53.64	45.18	sp|P43246|MSH2_HUMAN	DNA mismatch repair protein Msh2 OS=Homo sapiens GN=MSH2 PE=1 SV=1	HUMAN	41			1.1695	0.984707	1.10662	1.05682	1.28233	1.44544	0.0327209	1.15878	1.24738	1.64437	1.48594	0.0349144	1.1695	1.27057	1.78649	0.436516	0.00414548	1.35519	0.285759	0.591562	0.474242	0.00640344	1.39316	0.328095	0.660693	1.00925	0.698382	1.1272	0.895365	1.13763	0.524807	0.153743	1.23595	0.416869	0.648634
183	68.37	69.41	62.91	55.64	48.04	sp|Q13435|SF3B2_HUMAN	Splicing factor 3B subunit 2 OS=Homo sapiens GN=SF3B2 PE=1 SV=2	HUMAN	47			1.1272	0.622675	1.1272	1	1.30617	1.39316	0.107127	1.1695	1.19124	1.55597	2.31206	5.38053e-05	1.30617	1.77011	3.01995	1.1272	0.85534	1.09648	1.02802	1.21339	1.11686	0.603131	1.1272	0.990832	1.23595	1.49968	0.0606589	1.18032	1.27057	1.75388	1.1272	0.167359	1.09648	1.02802	1.2942
184	68.31	68.83	55.59	46.09	44.18	sp|Q12906|ILF3_HUMAN	Interleukin enhancer-binding factor 3 OS=Homo sapiens GN=ILF3 PE=1 SV=3	HUMAN	72			0.895365	0.597597	1.05682	0.847227	0.946237	1.20226	0.511173	1.07647	1.11686	1.2942	2.05116	0.00649447	1.1695	1.75388	2.39883	1.05682	0.97987	1.05682	1	1.11686	1.33045	0.457781	1.09648	1.21339	1.43219	1.80302	0.262072	1.1695	1.5417	1.94089	1.38038	0.374857	1.10662	1.24738	1.55597
185	68.26	68.4	60.62	46.31	41.2	sp|O00410|IPO5_HUMAN	Importin-5 OS=Homo sapiens GN=IPO5 PE=1 SV=4	HUMAN	57			1.13763	0.422383	1.09648	1.03753	1.27057	0.534564	0.0963542	1.2942	0.444631	0.691831	0.717794	0.111458	1.15878	0.642688	0.831764	0.77983	0.218534	1.15878	0.672977	0.903649	0.648634	0.117815	1.23595	0.496592	0.801678	0.625173	0.0740919	1.23595	0.554626	0.772681	0.383707	0.00186509	1.38038	0.316228	0.529663
186	68.24	72.86	56.98	41.1	33.33	sp|O95347|SMC2_HUMAN	Structural maintenance of chromosomes protein 2 OS=Homo sapiens GN=SMC2 PE=1 SV=2	HUMAN	44			0.92045	0.492777	1.1272	0.816582	1.03753	0.672977	0.469823	1.28233	0.57544	0.862979	1.0666	0.469265	1.09648	0.972747	1.19124	0.487529	0.00439571	1.48594	0.356451	0.724436	0.428549	0.00191208	1.64437	0.319154	0.704693	0.981748	0.670298	1.09648	0.903649	1.07647	0.92045	0.819127	1.11686	0.824138	1.02802
187	67.74	68.12	62.33	53.68	43.33	sp|P63010|AP2B1_HUMAN	AP-2 complex subunit beta OS=Homo sapiens GN=AP2B1 PE=1 SV=1	HUMAN	56			0.809096	0.374378	1.19124	0.698232	0.963829	0.787046	0.633204	1.25893	0.642688	0.990832	1.02802	0.751013	1.1272	0.912011	1.15878	1.28233	0.809797	1.13763	1.1272	1.44544	1.18032	0.43265	1.14815	1.02802	1.40605	1.2942	0.500075	1.1272	1.14815	1.44544	0.672977	0.461066	1.24738	0.580764	0.83946
188	67.71	73	48.51	37.56	30.7	sp|Q10570|CPSF1_HUMAN	Cleavage and polyadenylation specificity factor subunit 1 OS=Homo sapiens GN=CPSF1 PE=1 SV=2	HUMAN	43			0.903649	0.466438	1.11686	0.794328	1.00925	0.972747	0.636562	1.11686	0.879023	1.08643	0.895365	0.618732	1.11686	0.809096	1	1.03753	0.547768	1.1272	0.92045	1.15878	0.862979	0.281144	1.11686	0.758578	0.963829	1.07647	0.815598	1.11686	0.963829	1.25893	0.608135	0.0402028	1.18032	0.539511	0.717794
189	67.57	69.99	58.86	51.34	43.92	sp|Q9NZB2|F120A_HUMAN	Constitutive coactivator of PPAR-gamma-like protein 1 OS=Homo sapiens GN=FAM120A PE=1 SV=2	HUMAN	50			0.92045	0.79937	1.1272	0.816582	1.03753	0.816582	0.998305	1.19124	0.717794	0.972747	1.07647	0.734932	1.15878	0.928966	1.31826	0.724436	0.763654	1.21339	0.608135	0.879023	0.895365	0.557896	1.11686	0.794328	1	0.824138	0.519371	1.14815	0.630957	0.946237	0.501187	0.06616	1.45881	0.380189	0.731139
190	67.4	69.9	35.07	23.51	14.39	sp|P50851|LRBA_HUMAN	Lipopolysaccharide-responsive and beige-like anchor protein OS=Homo sapiens GN=LRBA PE=1 SV=4	HUMAN	39			1	0.260686	1.05682	0.946237	1.05682	0.981748	0.569894	1.05682	0.928966	1.03753	0.990832	0.923251	1.05682	0.937562	1.04713	1	0.822059	1.05682	0.946237	1.05682	0.972747	0.711653	1.05682	0.92045	1.02802	0.990832	0.700262	1.05682	0.937562	1.04713	0.963829	0.609929	1.05682	0.912011	1.01859
191	67.36	67.92	61.19	46.67	37.61	sp|O43491|E41L2_HUMAN	Band 4.1-like protein 2 OS=Homo sapiens GN=EPB41L2 PE=1 SV=1	HUMAN	43			0.737904	0.721866	1.13763	0.619441	0.83946	1.1695	0.04464	1.13763	1.02802	1.35519	2.12814	1.89927e-07	1.40605	1.51356	2.53513	0.879023	0.525758	1.09648	0.801678	0.963829	1.21339	0.157744	1.1272	1.07647	1.34276	1.31826	0.00805772	1.19124	1.10662	1.47231	1.34276	0.00370079	1.18032	1.13763	1.5417
192	67.27	69.91	69.92	63.19	51.45	sp|Q16891|IMMT_HUMAN	Mitochondrial inner membrane protein OS=Homo sapiens GN=IMMT PE=1 SV=1	HUMAN	46			0.440555	0.0577202	1.6293	0.288403	0.717794	1.97697	0.000560553	1.31826	1.49968	2.51189	0.519996	0.0169828	1.45881	0.363078	0.758578	2.44343	1.09185e-06	1.43219	1.70608	3.28095	1.8197	0.00393737	1.30617	1.39316	2.31206	0.505825	0.00771989	1.48594	0.363078	0.751623	0.801678	0.329792	1.1695	0.731139	0.937562
193	67.18	68.28	54.64	43.35	34.65	sp|O75694|NU155_HUMAN	Nuclear pore complex protein Nup155 OS=Homo sapiens GN=NUP155 PE=1 SV=1	HUMAN	50			1.02802	0.536541	1.09648	0.937562	1.13763	1.02802	0.911411	1.09648	0.937562	1.13763	1.30617	0.30242	1.1695	1.11686	1.47231	0.801678	0.624486	1.19124	0.679204	0.954993	0.809096	0.425352	1.1272	0.731139	0.912011	1.10662	0.638002	1.10662	1	1.28233	0.625173	0.158709	1.23595	0.519996	0.772681
194	67.05	67.77	45.65	39.29	27.72	sp|O14841|OPLA_HUMAN	5-oxoprolinase OS=Homo sapiens GN=OPLAH PE=1 SV=3	HUMAN	37			1.01859	0.800307	1.11686	0.912011	1.1272	0.751623	0.427756	1.21339	0.642688	0.912011	0.744732	0.225491	1.19124	0.642688	0.887156	0.816582	0.474461	1.15878	0.717794	0.946237	0.613762	0.0670121	1.31826	0.510505	0.809096	1.14815	0.586702	1.11686	1.02802	1.28233	0.816582	0.385297	1.13763	0.698232	0.928966
195	67.04	67.17	77.4	74.5	66.56	sp|P49748|ACADV_HUMAN	Very long-chain specific acyl-CoA dehydrogenase, mitochondrial OS=Homo sapiens GN=ACADVL PE=1 SV=1	HUMAN	64			0.586138	0.295495	1.39316	0.398107	0.816582	0.912011	0.458853	1.07647	0.83946	0.981748	0.928966	0.834313	1.07647	0.870964	1	1.8197	0.000708792	1.31826	1.38038	2.88403	1.70608	0.00141882	1.27057	1.34276	2.58226	2.37684	5.84754e-07	1.41906	1.67494	4.2462	1.11686	0.0159854	1.09648	1.01859	1.43219
196	66.58	68.19	40.2	27.57	21.69	sp|Q8WWQ0|PHIP_HUMAN	PH-interacting protein OS=Homo sapiens GN=PHIP PE=1 SV=2	HUMAN	36			0.801678	0.351226	1.19124	0.691831	0.954993	1.02802	0.83013	1.15878	0.887156	1.21339	1.19124	0.543187	1.20226	0.990832	1.47231	0.831764	0.0764274	1.15878	0.724436	0.963829	1.00925	0.344211	1.1695	0.862979	1.20226	1.00925	0.739068	1.15878	0.870964	1.18032	0.636796	0.0635492	1.33045	0.549541	0.847227
197	66.48	68.13	62.26	51.16	44.4	sp|Q8TEX9|IPO4_HUMAN	Importin-4 OS=Homo sapiens GN=IPO4 PE=1 SV=2	HUMAN	53			1.01859	0.305754	1.07647	0.946237	1.09648	0.711214	0.012316	1.10662	0.625173	0.787046	0.666807	0.000676179	1.11686	0.586138	0.744732	0.49204	6.61715e-06	1.2942	0.353183	0.636796	0.299226	7.23497e-08	1.65959	0.222844	0.496592	0.554626	4.7627e-05	1.23595	0.420727	0.685488	0.316228	1.09211e-08	1.47231	0.226986	0.465586
198	66.45	67.57	52.54	44.92	33.03	sp|Q93009|UBP7_HUMAN	Ubiquitin carboxyl-terminal hydrolase 7 OS=Homo sapiens GN=USP7 PE=1 SV=2	HUMAN	36			1.10662	0.779306	1.13763	0.972747	1.24738	0.946237	0.535095	1.09648	0.855067	1.03753	0.981748	0.992325	1.10662	0.895365	1.08643	0.801678	0.28687	1.14815	0.654636	0.92045	1.03753	0.866955	1.10662	0.937562	1.15878	1.13763	0.921616	1.13763	1	1.2942	0.691831	0.38434	1.27057	0.544503	0.879023
199	66.39	66.44	73.72	69.04	63.03	sp|P31943|HNRH1_HUMAN	Heterogeneous nuclear ribonucleoprotein H OS=Homo sapiens GN=HNRNPH1 PE=1 SV=4	HUMAN	91			0.809096	0.382575	1.09648	0.744732	0.887156	0.972747	0.74327	1.09648	0.887156	1.0666	1.48594	0.114886	1.21339	1.22462	1.85353	0.981748	0.24381	1.07647	0.903649	1.05682	1.03753	0.322629	1.08643	0.954993	1.1272	0.946237	0.593771	1.09648	0.847227	1.03753	0.570164	0.752597	1.33045	0.483059	0.758578
200	66.28	66.51	62.84	58.11	52.97	sp|Q92499|DDX1_HUMAN	ATP-dependent RNA helicase DDX1 OS=Homo sapiens GN=DDX1 PE=1 SV=2	HUMAN	48			0.92045	0.911062	1.09648	0.847227	1.00925	0.401791	0.0262562	1.45881	0.353183	0.586138	0.903649	0.95322	1.10662	0.824138	1	0.816582	0.627342	1.11686	0.744732	0.912011	1	0.815415	1.09648	0.912011	1.1272	1.10662	0.570489	1.1272	0.981748	1.27057	0.717794	0.41725	1.18032	0.654636	0.847227
201	65.96	75.21	34.75	27.35	16.65	sp|Q93008|USP9X_HUMAN	Probable ubiquitin carboxyl-terminal hydrolase FAF-X OS=Homo sapiens GN=USP9X PE=1 SV=3	HUMAN	44			1.11686	0.845592	1.14815	0.972747	1.25893	0.37325	0.0039483	1.85353	0.277971	0.691831	0.685488	0.118364	1.31826	0.534564	0.903649	1.28233	0.418927	1.1695	1.09648	1.47231	0.981748	0.9222	1.13763	0.862979	1.11686	0.990832	0.462641	1.1272	0.879023	1.11686	0.937562	0.386649	1.14815	0.809096	1.07647
202	65.92	70.6	66.76	55.72	47.55	sp|P33992|MCM5_HUMAN	DNA replication licensing factor MCM5 OS=Homo sapiens GN=MCM5 PE=1 SV=5	HUMAN	41			0.954993	0.330625	1.08643	0.879023	1.03753	0.879023	0.238458	1.10662	0.794328	0.972747	0.691831	0.0359031	1.18032	0.580764	0.816582	0.288403	8.71523e-08	1.77011	0.188799	0.510505	0.359749	1.15565e-05	1.61436	0.270396	0.580764	0.636796	0.00122449	1.21339	0.544503	0.772681	0.636796	0.070963	1.27057	0.529663	0.809096
203	65.79	70.1	68.43	59.25	48.12	sp|P33993|MCM7_HUMAN	DNA replication licensing factor MCM7 OS=Homo sapiens GN=MCM7 PE=1 SV=4	HUMAN	51			1.03753	0.85661	1.09648	0.946237	1.11686	0.539511	0.0248735	1.23595	0.469894	0.666807	0.654636	0.0204724	1.1272	0.586138	0.737904	0.265461	1.93808e-06	1.45881	0.20893	0.387258	0.353183	1.08348e-05	1.47231	0.270396	0.519996	0.474242	0.0040692	1.33045	0.387258	0.630957	0.436516	0.0162531	1.28233	0.387258	0.559758
204	65.75	66.27	48.3	35.88	28.42	sp|Q9NYU2|UGGG1_HUMAN	UDP-glucose:glycoprotein glucosyltransferase 1 OS=Homo sapiens GN=UGGT1 PE=1 SV=3	HUMAN	39			0.57544	0.0764873	1.34276	0.501187	0.772681	1.20226	0.344283	1.15878	1.03753	1.52757	1.0666	0.969484	1.1272	0.946237	1.27057	1.31826	0.127468	1.19124	1.10662	1.59956	1.43219	0.0878616	1.25893	1.13763	1.94089	1.61436	0.022878	1.27057	1.27057	2.12814	0.946237	0.685988	1.19124	0.831764	1.1272
205	65.66	65.75	51.57	43.34	35.28	sp|Q6ZRV2|FA83H_HUMAN	Protein FAM83H OS=Homo sapiens GN=FAM83H PE=1 SV=3	HUMAN	41			0.77983	0.182978	1.1695	0.660693	0.912011	0.831764	0.0885188	1.1272	0.711214	0.937562	0.928966	0.907813	1.10662	0.83946	1.02802	0.580764	0.0022047	1.34276	0.436516	0.77983	0.559758	0.000333863	1.33045	0.398107	0.744732	0.794328	0.177417	1.13763	0.636796	0.903649	0.724436	0.292273	1.20226	0.619441	0.870964
206	65.51	65.61	63.53	50.75	44.86	sp|O75534|CSDE1_HUMAN	Cold shock domain-containing protein E1 OS=Homo sapiens GN=CSDE1 PE=1 SV=2	HUMAN	36			1	0.621659	1.09648	0.912011	1.09648	0.515229	0.000552923	1.35519	0.390841	0.698232	0.672977	0.0131554	1.21339	0.570164	0.816582	0.501187	5.33581e-05	1.38038	0.369828	0.691831	0.380189	1.28956e-05	1.59956	0.258226	0.608135	0.218776	1.06062e-09	2.18776	0.12942	0.47863	0.244343	1.42674e-07	2.01372	0.164437	0.49204
207	65.48	70.41	89.96	82.87	78.74	sp|P07237|PDIA1_HUMAN	Protein disulfide-isomerase OS=Homo sapiens GN=P4HB PE=1 SV=3	HUMAN	86			0.809096	0.766207	1.04713	0.758578	0.847227	1.52757	0.33201	1.0666	1.43219	1.61436	2.31206	0.00631203	1.18032	1.95884	2.65461	2.99226	0.0022784	1.23595	2.42103	3.53183	3.43558	0.00138438	1.24738	2.75423	4.01791	3.80189	2.35601e-05	1.25893	3.01995	4.74242	2.1677	0.00373711	1.19124	1.8197	2.48886
208	65.41	67.64	38.93	26.83	22.77	sp|Q7KZ85|SPT6H_HUMAN	Transcription elongation factor SPT6 OS=Homo sapiens GN=SUPT6H PE=1 SV=2	HUMAN	38			0.990832	0.575288	1.13763	0.855067	1.1272	0.847227	0.772667	1.1272	0.758578	0.954993	0.83946	0.552768	1.13763	0.724436	0.954993	0.666807	0.166022	1.21339	0.42462	0.809096	0.57544	0.0889565	1.33045	0.440555	0.765597	1	0.603537	1.18032	0.847227	1.1272	0.717794	0.977037	1.27057	0.597035	0.912011
209	65.27	71.11	78.85	74.4	67.9	sp|P50991|TCPD_HUMAN	T-complex protein 1 subunit delta OS=Homo sapiens GN=CCT4 PE=1 SV=4	HUMAN	62			1.07647	0.682956	1.0666	1.00925	1.14815	0.586138	0.00118051	1.30617	0.505825	0.765597	0.737904	0.0179176	1.13763	0.613762	0.83946	0.772681	0.0493252	1.08643	0.704693	0.83946	0.570164	0.000331333	1.30617	0.461318	0.744732	0.691831	0.00500621	1.1695	0.586138	0.809096	0.496592	0.00129926	1.41906	0.416869	0.704693
210	65.15	65.54	69.51	58.45	51.97	sp|O43390|HNRPR_HUMAN	Heterogeneous nuclear ribonucleoprotein R OS=Homo sapiens GN=HNRNPR PE=1 SV=1	HUMAN	52			0.879023	0.781276	1.07647	0.816582	0.946237	1.35519	0.440586	1.22462	1.10662	1.59956	1.97697	0.0165854	1.38038	1.43219	2.67917	1.41906	0.31903	1.23595	1.14815	1.67494	1.65959	0.228335	1.31826	1.25893	2.12814	1.55597	0.20525	1.30617	1.19124	1.94089	0.862979	0.82086	1.15878	0.77983	1
211	64.91	88.06	85.02	75.82	71.92	sp|P08107|HSP71_HUMAN	Heat shock 70 kDa protein 1A/1B OS=Homo sapiens GN=HSPA1A PE=1 SV=5	HUMAN	149			1.41906	0.331302	1.0666	1.33045	1.51356	0.586138	0.279986	1.09648	0.539511	0.642688	1.65959	0.0929283	1.09648	1.51356	1.8197	0.47863	0.118991	1.14815	0.413047	0.549541	0.440555	0.21518	1.13763	0.380189	0.501187	1.15878	0.640716	1.0666	1.08643	1.23595	0.83946	0.898555	1.05682	0.787046	0.887156
213	64.66	68.42	42.82	31.93	24.75	sp|P26358|DNMT1_HUMAN	DNA (cytosine-5)-methyltransferase 1 OS=Homo sapiens GN=DNMT1 PE=1 SV=2	HUMAN	43			1.03753	0.642574	1.10662	0.937562	1.13763	0.895365	0.84857	1.11686	0.787046	1	0.928966	0.630216	1.09648	0.847227	1.01859	0.380189	2.35216e-05	1.41906	0.224905	0.539511	0.409261	0.00166903	1.39316	0.267917	0.570164	0.369828	0.000156836	1.49968	0.229087	0.554626	0.212814	0.000268855	1.88799	0.133045	0.401791
212	64.66	69.79	40.99	33.28	22.36	sp|Q5SRE5|NU188_HUMAN	Nucleoporin NUP188 homolog OS=Homo sapiens GN=NUP188 PE=1 SV=1	HUMAN	40			0.816582	0.995235	1.18032	0.711214	0.963829	0.787046	0.892708	1.15878	0.698232	0.912011	0.895365	0.703165	1.18032	0.77983	1.05682	0.564937	0.17906	1.2942	0.448745	0.731139	0.496592	0.0191281	1.34276	0.380189	0.666807	0.824138	0.288884	1.1695	0.648634	0.963829	0.554626	0.0777924	1.23595	0.452898	0.685488
214	64.62	66.3	79.57	70.68	59.8	sp|P04843|RPN1_HUMAN	Dolichyl-diphosphooligosaccharide--protein glycosyltransferase subunit 1 OS=Homo sapiens GN=RPN1 PE=1 SV=1	HUMAN	63			0.855067	0.435382	1.10662	0.794328	0.946237	1.35519	0.0184671	1.09648	1.23595	1.51356	2.22844	0.0108729	1.18032	1.88799	2.70396	1.97697	0.000719022	1.11686	1.77011	2.35505	2.91072	1.52599e-05	1.23595	2.35505	3.69828	2.07014	0.00247601	1.15878	1.78649	2.46604	1.35519	0.0212183	1.10662	1.22462	1.5417
215	64.59	103.23	50.98	34.79	26.12	sp|Q7Z406|MYH14_HUMAN	Myosin-14 OS=Homo sapiens GN=MYH14 PE=1 SV=2	HUMAN	60			0.870964	0.388155	1.13763	0.717794	0.990832	1.24738	0.338518	1.20226	1.03753	1.45881	0.613762	0.0048487	1.30617	0.474242	0.801678	1.00925	0.880998	1.13763	0.887156	1.15878	1.35519	0.613791	1.28233	1.05682	1.6293	1.21339	0.590276	1.21339	1	1.40605	1.13763	0.887304	1.15878	0.981748	1.30617
216	64.28	68.32	43.14	30.52	23.49	sp|O95602|RPA1_HUMAN	DNA-directed RNA polymerase I subunit RPA1 OS=Homo sapiens GN=POLR1A PE=1 SV=2	HUMAN	38			1.04713	0.381741	1.1272	0.928966	1.18032	0.758578	0.233937	1.22462	0.636796	0.928966	1.20226	0.167367	1.15878	1.03753	1.40605	0.483059	0.0104143	1.43219	0.366438	0.691831	0.580764	0.0220738	1.35519	0.457088	0.787046	0.672977	0.0286646	1.19124	0.510505	0.801678	0.398107	0.000171463	1.59956	0.272898	0.636796
217	64.27	65.55	65.36	58.01	47.57	sp|P11216|PYGB_HUMAN	Glycogen phosphorylase, brain form OS=Homo sapiens GN=PYGB PE=1 SV=5	HUMAN	40			0.824138	0.416086	1.14815	0.724436	0.946237	0.654636	0.111435	1.30617	0.544503	0.855067	0.487529	0.00499303	1.39316	0.390841	0.679204	1.19124	0.188874	1.13763	1.04713	1.40605	1.18032	0.582651	1.13763	1.03753	1.40605	1.25893	0.35295	1.13763	1.10662	1.57036	0.613762	0.683503	1.24738	0.534564	0.765597
218	64.19	69.64	52.77	44.99	40.43	sp|O15067|PUR4_HUMAN	Phosphoribosylformylglycinamidine synthase OS=Homo sapiens GN=PFAS PE=1 SV=4	HUMAN	48			1.22462	0.515685	1.1272	1.08643	1.38038	0.625173	0.0724783	1.27057	0.448745	0.794328	0.816582	0.254611	1.1272	0.711214	0.92045	0.672977	5.38964e-05	1.21339	0.549541	0.816582	0.394457	5.97159e-06	1.55597	0.275423	0.613762	0.648634	0.00620868	1.19124	0.487529	0.772681	0.444631	8.3889e-05	1.43219	0.293765	0.636796
219	63.78	64.26	53.23	42.16	35.16	sp|Q92900|RENT1_HUMAN	Regulator of nonsense transcripts 1 OS=Homo sapiens GN=UPF1 PE=1 SV=2	HUMAN	44			1.14815	0.326527	1.09648	1.04713	1.30617	0.765597	0.0657707	1.20226	0.580764	0.92045	0.809096	0.327746	1.1695	0.704693	0.946237	0.847227	0.0811212	1.11686	0.698232	0.946237	0.717794	0.0117446	1.20226	0.559758	0.862979	0.630957	0.00191743	1.27057	0.524807	0.801678	0.47863	0.00356623	1.44544	0.346737	0.691831
220	63.68	63.92	62.39	46.4	42.8	sp|Q9H3U1|UN45A_HUMAN	Protein unc-45 homolog A OS=Homo sapiens GN=UNC45A PE=1 SV=1	HUMAN	43			0.679204	0.04185	1.20226	0.597035	0.816582	0.679204	0.176389	1.20226	0.613762	0.816582	0.648634	0.0112825	1.21339	0.559758	0.787046	0.831764	0.255871	1.15878	0.737904	0.963829	0.794328	0.0325035	1.1272	0.685488	0.895365	0.794328	0.373473	1.15878	0.717794	0.92045	0.801678	0.546136	1.1272	0.717794	0.903649
221	63.62	66.49	37.1	29.36	21.89	sp|Q8TEM1|PO210_HUMAN	Nuclear pore membrane glycoprotein 210 OS=Homo sapiens GN=NUP210 PE=1 SV=3	HUMAN	41			0.724436	0.188662	1.1272	0.608135	0.816582	1.14815	0.536911	1.11686	1.02802	1.31826	1.14815	0.678645	1.1272	1.01859	1.36773	1.34276	0.25659	1.20226	1.11686	1.58489	1.59956	0.027957	1.23595	1.2942	1.94089	1.75388	0.0193353	1.2942	1.35519	2.14783	1.24738	0.14535	1.13763	1.09648	1.49968
222	63.48	65.38	80.45	77.62	71.95	sp|P22626|ROA2_HUMAN	Heterogeneous nuclear ribonucleoproteins A2/B1 OS=Homo sapiens GN=HNRNPA2B1 PE=1 SV=2	HUMAN	109			0.862979	0.810443	1.04713	0.824138	0.903649	1.25893	0.462748	1.07647	1.1695	1.36773	1.64437	0.00802002	1.13763	1.44544	1.90546	1.39316	0.279587	1.10662	1.25893	1.57036	1.27057	0.532254	1.09648	1.15878	1.41906	1.44544	0.576364	1.11686	1.2942	1.58489	0.510505	0.0707954	1.07647	0.487529	0.549541
223	63.37	65.92	56.05	48.75	36.28	sp|P42285|SK2L2_HUMAN	Superkiller viralicidic activity 2-like 2 OS=Homo sapiens GN=SKIV2L2 PE=1 SV=3	HUMAN	35			0.963829	0.539905	1.09648	0.870964	1.05682	0.847227	0.739544	1.13763	0.731139	0.963829	1.11686	0.151089	1.08643	1.02802	1.22462	0.613762	0.0175812	1.28233	0.409261	0.787046	0.549541	0.0577627	1.39316	0.369828	0.765597	0.654636	0.0340448	1.27057	0.47863	0.831764	0.353183	0.0014413	1.77011	0.20893	0.625173
224	63.35	66.04	62.41	48.46	42.17	sp|O94973|AP2A2_HUMAN	AP-2 complex subunit alpha-2 OS=Homo sapiens GN=AP2A2 PE=1 SV=2	HUMAN	39			0.816582	0.443908	1.18032	0.691831	0.963829	0.809096	0.604059	1.20226	0.672977	0.972747	0.946237	0.695207	1.14815	0.816582	1.08643	1.39316	0.0801344	1.24738	1.11686	1.75388	0.879023	0.843684	1.18032	0.691831	1.03753	1.40605	0.093334	1.21339	1.15878	1.69044	0.92045	0.426114	1.14815	0.724436	1.05682
225	63.29	63.41	64.37	55.43	50.07	sp|P43304|GPDM_HUMAN	Glycerol-3-phosphate dehydrogenase, mitochondrial OS=Homo sapiens GN=GPD2 PE=1 SV=3	HUMAN	38			0.654636	0.0846569	1.22462	0.529663	0.801678	0.801678	0.487291	1.15878	0.724436	0.928966	0.559758	0.0247294	1.34276	0.380189	0.751623	1.14815	0.158749	1.10662	1.03753	1.25893	1.15878	0.450742	1.1272	1.02802	1.30617	0.349945	0.000780614	1.78649	0.210863	0.625173	0.586138	0.198244	1.28233	0.487529	0.751623
226	63.23	66.49	59.79	49.83	42.99	sp|P33991|MCM4_HUMAN	DNA replication licensing factor MCM4 OS=Homo sapiens GN=MCM4 PE=1 SV=5	HUMAN	41			0.937562	0.612852	1.07647	0.870964	1.00925	0.704693	0.0452328	1.15878	0.613762	0.816582	0.772681	0.0754232	1.10662	0.672977	0.855067	0.37325	3.73412e-06	1.5417	0.253513	0.57544	0.49204	0.000303768	1.35519	0.316228	0.666807	0.57544	0.00164973	1.24738	0.457088	0.717794	0.608135	0.00246824	1.23595	0.505825	0.751623
227	63.17	65.6	59.56	51.38	37.67	sp|Q8WUM4|PDC6I_HUMAN	Programmed cell death 6-interacting protein OS=Homo sapiens GN=PDCD6IP PE=1 SV=1	HUMAN	38			0.895365	0.8671	1.09648	0.816582	0.981748	0.432514	0.00348696	1.31826	0.349945	0.570164	0.698232	0.203659	1.15878	0.549541	0.809096	1.27057	0.193718	1.19124	1.0666	1.43219	1.49968	0.0030748	1.18032	1.27057	1.77011	0.879023	0.881692	1.10662	0.77983	0.972747	0.704693	0.468912	1.14815	0.619441	0.809096
228	63.16	65.4	33.82	18.7	10.28	sp|P46939|UTRO_HUMAN	Utrophin OS=Homo sapiens GN=UTRN PE=1 SV=2	HUMAN	32			0.501187	0.0102413	1.6293	0.369828	0.816582	1.28233	0.0827641	1.20226	1.0666	1.51356	0.912011	0.489249	1.1695	0.765597	1.0666	1.83654	0.00450806	1.39316	1.31826	2.22844	1.8197	0.00136437	1.41906	1.28233	2.26986	1.44544	0.140865	1.21339	1.19124	1.67494	1.08643	0.846459	1.18032	0.92045	1.2942
229	63.11	66.13	29.06	23.12	16.86	sp|P18583|SON_HUMAN	Protein SON OS=Homo sapiens GN=SON PE=1 SV=4	HUMAN	37			0.660693	0.594587	1.25893	0.586138	0.831764	1.43219	0.240364	1.15878	1.23595	1.75388	1.85353	0.00320757	1.30617	1.41906	2.31206	0.787046	0.310317	1.1272	0.711214	0.887156	0.794328	0.49552	1.18032	0.724436	0.937562	1.23595	0.44749	1.11686	1.10662	1.44544	0.990832	0.562757	1.11686	0.895365	1.10662
230	63.07	66.58	68.89	65.87	56.03	sp|P08195|4F2_HUMAN	4F2 cell-surface antigen heavy chain OS=Homo sapiens GN=SLC3A2 PE=1 SV=3	HUMAN	57			0.92045	0.75504	1.0666	0.855067	0.981748	1.08643	0.14773	1.1272	0.963829	1.18032	1.44544	0.0044893	1.1272	1.28233	1.6293	0.398107	3.13391e-05	1.45881	0.322107	0.580764	0.448745	0.000430738	1.38038	0.369828	0.619441	0.591562	0.0616127	1.20226	0.519996	0.711214	0.436516	0.000162378	1.38038	0.369828	0.60256
231	62.73	64.84	46.61	39.47	33.9	sp|Q6P2E9|EDC4_HUMAN	Enhancer of mRNA-decapping protein 4 OS=Homo sapiens GN=EDC4 PE=1 SV=1	HUMAN	47			1	0.781668	1.10662	0.903649	1.10662	0.47863	0.06503	1.44544	0.340408	0.691831	0.77983	0.329985	1.15878	0.660693	0.903649	0.809096	0.390681	1.13763	0.691831	0.92045	0.648634	0.0761257	1.23595	0.519996	0.801678	0.903649	0.738833	1.10662	0.816582	1	0.679204	0.241446	1.19124	0.60256	0.809096
232	62.68	65.8	35.25	22.07	14.02	sp|Q9ULT8|HECD1_HUMAN	E3 ubiquitin-protein ligase HECTD1 OS=Homo sapiens GN=HECTD1 PE=1 SV=3	HUMAN	35			0.744732	0.196572	1.28233	0.591562	0.954993	0.559758	0.00711194	1.39316	0.405509	0.77983	0.570164	0.00473359	1.34276	0.448745	0.765597	0.625173	0.0290417	1.23595	0.515229	0.772681	0.636796	0.022412	1.27057	0.534564	0.809096	0.510505	0.000820004	1.45881	0.376704	0.744732	0.436516	0.000191452	1.5417	0.337287	0.672977
233	62.65	66.9	46.83	34	29.41	sp|O75153|K0664_HUMAN	Protein KIAA0664 OS=Homo sapiens GN=KIAA0664 PE=1 SV=2	HUMAN	38			1.13763	0.368329	1.15878	0.981748	1.34276	0.654636	0.105001	1.25893	0.559758	0.824138	0.77983	0.0585809	1.15878	0.672977	0.903649	0.457088	6.9698e-05	1.43219	0.331131	0.654636	0.37325	3.3973e-06	1.44544	0.244343	0.539511	0.428549	1.3295e-05	1.39316	0.283139	0.597035	0.349945	9.52747e-05	1.47231	0.231206	0.515229
234	62.61	63.28	38.98	25.27	17.92	sp|Q12789|TF3C1_HUMAN	General transcription factor 3C polypeptide 1 OS=Homo sapiens GN=GTF3C1 PE=1 SV=4	HUMAN	36			1.24738	0.139932	1.13763	1.09648	1.40605	1.02802	0.381671	1.1272	0.912011	1.1695	1.27057	0.0121748	1.1272	1.1272	1.43219	0.824138	0.681548	1.24738	0.691831	1.02802	0.879023	0.664018	1.15878	0.698232	1.01859	1	0.89514	1.27057	0.787046	1.1695	0.444631	0.0666591	1.25893	0.369828	0.559758
235	62.49	64.25	67.63	61.71	53.27	sp|O94874|UFL1_HUMAN	E3 UFM1-protein ligase 1 OS=Homo sapiens GN=UFL1 PE=1 SV=2	HUMAN	39			0.963829	0.919074	1.14815	0.847227	1.10662	1.02802	0.871917	1.14815	0.895365	1.20226	1.21339	0.401702	1.21339	1	1.48594	0.981748	0.657559	1.25893	0.83946	1.23595	1.80302	0.00571382	1.36773	1.31826	3.16228	1.57036	0.0193554	1.28233	1.22462	2.29087	0.981748	0.662717	1.28233	0.816582	1.25893
236	62.39	63.18	72.61	61.69	50.48	sp|P26639|SYTC_HUMAN	Threonyl-tRNA synthetase, cytoplasmic OS=Homo sapiens GN=TARS PE=1 SV=3	HUMAN	44			1.18032	0.0615571	1.11686	1.05682	1.31826	0.625173	0.0182536	1.28233	0.534564	0.801678	0.666807	0.134849	1.24738	0.570164	0.831764	0.744732	0.0444154	1.1695	0.654636	0.870964	0.672977	0.0103773	1.22462	0.608135	0.824138	0.549541	0.00405028	1.34276	0.432514	0.737904	0.444631	0.00303953	1.49968	0.376704	0.666807
237	62.32	62.5	84.51	77.43	71.46	sp|P49411|EFTU_HUMAN	Elongation factor Tu, mitochondrial OS=Homo sapiens GN=TUFM PE=1 SV=2	HUMAN	64			0.679204	0.751548	1.14815	0.619441	0.77983	1.44544	0.18881	1.14815	1.25893	1.59956	1.77011	0.0097026	1.21339	1.45881	2.05116	0.887156	0.978077	1.04713	0.824138	0.928966	1.08643	0.931723	1.05682	1.02802	1.14815	2.01372	0.0253011	1.24738	1.61436	2.33346	1.24738	0.147684	1.13763	1.09648	1.39316
238	62.05	62.42	58.5	49	43.64	sp|Q1KMD3|HNRL2_HUMAN	Heterogeneous nuclear ribonucleoprotein U-like protein 2 OS=Homo sapiens GN=HNRNPUL2 PE=1 SV=1	HUMAN	44			0.824138	0.72521	1.1695	0.564937	0.963829	1.11686	0.544416	1.09648	1.01859	1.24738	1.52757	0.105585	1.25893	1.21339	2.18776	1.69044	0.0617502	1.31826	1.28233	2.51189	1.70608	0.0471353	1.31826	1.2942	2.58226	2.208	0.000748232	1.43219	1.5417	3.90841	1.90546	0.0013841	1.31826	1.44544	3.04789
239	61.81	64.68	58.96	45.69	41.59	sp|P49736|MCM2_HUMAN	DNA replication licensing factor MCM2 OS=Homo sapiens GN=MCM2 PE=1 SV=4	HUMAN	49			1.20226	0.780876	1.09648	1.09648	1.30617	0.717794	0.0176181	1.1272	0.619441	0.809096	0.654636	0.0508849	1.15878	0.554626	0.758578	0.366438	0.000152519	1.5417	0.260615	0.564937	0.42462	6.09497e-05	1.40605	0.30761	0.597035	0.570164	0.0011429	1.28233	0.465586	0.731139	0.356451	0.000164035	1.51356	0.280543	0.539511
240	61.72	125.96	90.57	84.43	71.86	sp|P07900|HS90A_HUMAN	Heat shock protein HSP 90-alpha OS=Homo sapiens GN=HSP90AA1 PE=1 SV=5	HUMAN	186			1.21339	0.179117	1.07647	1.1272	1.2942	0.366438	1.67849e-05	1.24738	0.313329	0.457088	0.731139	0.133956	1.07647	0.691831	0.787046	0.625173	0.0160573	1.10662	0.564937	0.691831	0.496592	0.00877693	1.1695	0.444631	0.580764	0.809096	0.590298	1.05682	0.765597	0.855067	0.870964	0.238678	1.04713	0.83946	0.912011
241	61.63	68.74	72.15	62.54	57.49	sp|P17844|DDX5_HUMAN	Probable ATP-dependent RNA helicase DDX5 OS=Homo sapiens GN=DDX5 PE=1 SV=1	HUMAN	81			1.05682	0.530717	1.07647	0.981748	1.13763	0.870964	0.534284	1.0666	0.816582	0.928966	1.40605	0.0822162	1.1272	1.24738	1.58489	0.529663	0.144309	1.15878	0.469894	0.613762	0.57544	0.0807619	1.14815	0.524807	0.660693	0.608135	0.134879	1.21339	0.554626	0.737904	0.390841	0.00295661	1.2942	0.334195	0.505825
242	61.5	68.37	49.56	30.3	19.15	sp|Q8IVF2|AHNK2_HUMAN	Protein AHNAK2 OS=Homo sapiens GN=AHNAK2 PE=1 SV=2	HUMAN	29			0.524807	0.151388	1.36773	0.42462	0.717794	0.862979	0.720305	1.20226	0.666807	1.03753	0.394457	0.427453	1.57036	0.285759	0.619441	3.53183	1.11281e-07	1.44544	2.44343	5.97035	4.96592	1.08286e-10	1.64437	3.01995	8.62979	2.10863	0.00250479	1.35519	1.55597	2.93765	2.07014	0.00011062	1.38038	1.49968	3.0761
243	61.46	62.51	66.97	59.35	51.23	sp|P47897|SYQ_HUMAN	Glutaminyl-tRNA synthetase OS=Homo sapiens GN=QARS PE=1 SV=1	HUMAN	46			1.04713	0.731796	1.07647	0.972747	1.1272	0.691831	0.102667	1.11686	0.597035	0.772681	0.801678	0.663199	1.10662	0.685488	0.887156	0.704693	0.206136	1.14815	0.586138	0.809096	0.630957	0.00957056	1.1272	0.549541	0.711214	0.737904	0.215065	1.1272	0.613762	0.831764	0.47863	0.0198426	1.23595	0.380189	0.591562
244	61.42	61.92	53.96	42.67	31.22	sp|P29144|TPP2_HUMAN	Tripeptidyl-peptidase 2 OS=Homo sapiens GN=TPP2 PE=1 SV=4	HUMAN	36			0.895365	0.735381	1.09648	0.794328	0.981748	0.711214	0.167975	1.25893	0.608135	0.895365	1.09648	0.742202	1.13763	0.963829	1.23595	1.21339	0.393855	1.13763	1.0666	1.35519	1.04713	0.593996	1.11686	0.937562	1.14815	1.20226	0.798992	1.15878	1.03753	1.36773	0.809096	0.584687	1.10662	0.737904	0.895365
245	61.38	62.28	62.55	49.24	43.54	sp|A0AVT1|UBA6_HUMAN	Ubiquitin-like modifier-activating enzyme 6 OS=Homo sapiens GN=UBA6 PE=1 SV=1	HUMAN	39			1.20226	0.0782164	1.14815	1.04713	1.47231	0.366438	0.0913702	1.5417	0.30761	0.564937	0.847227	0.745231	1.10662	0.744732	0.937562	1.1695	0.18616	1.14815	1.01859	1.39316	0.954993	0.477793	1.19124	0.847227	1.13763	0.862979	0.592843	1.10662	0.772681	0.954993	0.895365	0.714847	1.1272	0.816582	1.00925
246	61.3	63.98	80.79	66.85	65.54	sp|P40227|TCPZ_HUMAN	T-complex protein 1 subunit zeta OS=Homo sapiens GN=CCT6A PE=1 SV=3	HUMAN	62			1.01859	0.737767	1.05682	0.963829	1.0666	0.483059	0.0208291	1.25893	0.416869	0.608135	0.758578	0.186523	1.1272	0.685488	0.855067	0.704693	0.156974	1.08643	0.642688	0.765597	0.519996	0.00698017	1.20226	0.420727	0.625173	0.630957	0.014399	1.15878	0.529663	0.731139	0.409261	0.0426085	1.19124	0.340408	0.487529
247	61.27	64.71	72.26	65.95	56.64	sp|Q07065|CKAP4_HUMAN	Cytoskeleton-associated protein 4 OS=Homo sapiens GN=CKAP4 PE=1 SV=2	HUMAN	47			0.457088	0.018104	1.51356	0.319154	0.691831	1.43219	0.0533449	1.20226	1.19124	1.64437	1.11686	0.179936	1.07647	1.03753	1.20226	1.88799	1.4407e-05	1.30617	1.44544	2.24905	1.99526	7.26134e-07	1.36773	1.45881	2.37684	1.67494	0.000284645	1.24738	1.34276	2.07014	1.07647	0.00307165	1.07647	1	1.15878
248	60.92	61.03	71.74	65.35	53.53	sp|P51659|DHB4_HUMAN	Peroxisomal multifunctional enzyme type 2 OS=Homo sapiens GN=HSD17B4 PE=1 SV=3	HUMAN	38			0.903649	0.780682	1.11686	0.801678	1.00925	1.14815	0.269163	1.08643	1.05682	1.24738	1.57036	0.0383568	1.25893	1.24738	1.88799	1.57036	0.00918146	1.22462	1.28233	1.83654	1.90546	0.0020417	1.34276	1.41906	2.39883	1.49968	0.0537497	1.23595	1.21339	1.72187	0.879023	0.347054	1.11686	0.787046	0.981748
249	60.83	62.09	62.4	48.65	35.42	sp|O60313|OPA1_HUMAN	Dynamin-like 120 kDa protein, mitochondrial OS=Homo sapiens GN=OPA1 PE=1 SV=3	HUMAN	38			0.912011	0.896218	1.13763	0.824138	1.03753	0.824138	0.727398	1.19124	0.751623	0.981748	1.21339	0.0288544	1.13763	1.0666	1.45881	1.24738	0.0805533	1.15878	1.07647	1.40605	1.36773	0.0162045	1.1695	1.1695	1.6293	1.27057	0.0465398	1.20226	1.05682	1.52757	0.954993	0.178297	1.09648	0.847227	1.04713
250	60.73	61.18	88.92	85.03	85.03	sp|P07195|LDHB_HUMAN	L-lactate dehydrogenase B chain OS=Homo sapiens GN=LDHB PE=1 SV=2	HUMAN	117			1.04713	0.0345131	1.00925	1.03753	1.05682	0.92045	0.00414773	1.00925	0.912011	0.928966	0.963829	0.492715	1.00925	0.954993	0.972747	0.92045	0.0428152	1.00925	0.912011	0.928966	0.903649	0.00330324	1.00925	0.895365	0.912011	0.912011	0.0064979	1.00925	0.903649	0.92045	0.954993	0.146866	1.00925	0.946237	0.963829
251	60.61	60.68	63.62	57.89	51.89	sp|Q08J23|NSUN2_HUMAN	tRNA (cytosine(34)-C(5))-methyltransferase OS=Homo sapiens GN=NSUN2 PE=1 SV=2	HUMAN	37			0.895365	0.712933	1.10662	0.801678	0.990832	0.704693	0.115999	1.18032	0.564937	0.831764	0.625173	0.01955	1.25893	0.501187	0.787046	0.613762	0.0204599	1.22462	0.47863	0.751623	0.474242	0.000277034	1.41906	0.328095	0.672977	0.398107	9.66776e-05	1.5417	0.291072	0.613762	0.383707	0.00303441	1.48594	0.255859	0.570164
252	60.59	61.53	47.01	35.24	29.11	sp|Q12769|NU160_HUMAN	Nuclear pore complex protein Nup160 OS=Homo sapiens GN=NUP160 PE=1 SV=3	HUMAN	38			0.824138	0.669279	1.1272	0.717794	0.928966	0.981748	0.383976	1.1272	0.862979	1.10662	1.31826	0.301819	1.15878	1.13763	1.49968	1.02802	0.401289	1.14815	0.895365	1.15878	0.724436	0.0217893	1.15878	0.608135	0.83946	1.08643	0.546353	1.15878	0.937562	1.22462	0.469894	0.0411966	1.52757	0.37325	0.717794
253	60.53	60.86	54.8	45.54	36.38	sp|Q01780|EXOSX_HUMAN	Exosome component 10 OS=Homo sapiens GN=EXOSC10 PE=1 SV=2	HUMAN	32			1.01859	0.55129	1.11686	0.912011	1.13763	0.963829	0.188287	1.11686	0.862979	1.07647	1.41906	0.258534	1.21339	1.1695	1.72187	0.448745	0.00430078	1.58489	0.363078	0.711214	0.608135	0.0019461	1.25893	0.505825	0.765597	0.691831	0.0275238	1.20226	0.608135	0.831764	0.559758	0.0561347	1.30617	0.469894	0.731139
254	60.37	65.84	62.03	58.51	54.29	sp|Q92945|FUBP2_HUMAN	Far upstream element-binding protein 2 OS=Homo sapiens GN=KHSRP PE=1 SV=4	HUMAN	75			0.946237	0.623733	1.0666	0.870964	1.00925	1.24738	0.894967	1.0666	1.1695	1.31826	1.33045	0.198556	1.08643	1.22462	1.41906	0.672977	0.192124	1.09648	0.591562	0.737904	0.654636	0.156411	1.1272	0.554626	0.737904	1.24738	0.404179	1.0666	1.1695	1.31826	1.1272	0.804747	1.0666	1.05682	1.20226
255	60.32	61.54	57.63	53.09	43.51	sp|Q15459|SF3A1_HUMAN	Splicing factor 3A subunit 1 OS=Homo sapiens GN=SF3A1 PE=1 SV=1	HUMAN	41			0.972747	0.665934	1.08643	0.895365	1.05682	1.09648	0.289491	1.08643	1.00925	1.19124	1.80302	0.000214922	1.34276	1.34276	2.31206	0.879023	0.758477	1.09648	0.801678	0.963829	1.01859	0.792574	1.08643	0.937562	1.09648	1.40605	0.0500043	1.24738	1.1272	1.7378	1.05682	0.0851127	1.09648	0.963829	1.18032
256	60.07	64.95	58.9	47.44	40.7	sp|Q6UB35|C1TM_HUMAN	Monofunctional C1-tetrahydrofolate synthase, mitochondrial OS=Homo sapiens GN=MTHFD1L PE=1 SV=1	HUMAN	39			0.954993	0.813195	1.09648	0.83946	1.04713	0.879023	0.517498	1.11686	0.787046	0.981748	1.1695	0.105896	1.10662	1.05682	1.31826	0.420727	0.00283831	1.5417	0.288403	0.648634	0.549541	0.00588995	1.28233	0.420727	0.704693	0.60256	0.0208912	1.23595	0.461318	0.744732	0.49204	0.0152244	1.33045	0.353183	0.654636
257	59.8	101.45	53.75	41.51	31.61	sp|Q02880|TOP2B_HUMAN	DNA topoisomerase 2-beta OS=Homo sapiens GN=TOP2B PE=1 SV=3	HUMAN	59			1.13763	0.796032	1.11686	1.01859	1.27057	1.05682	0.794997	1.10662	0.954993	1.1695	1.59956	0.00866705	1.24738	1.28233	1.95884	1.18032	0.261981	1.11686	1.05682	1.36773	1.14815	0.755582	1.11686	1.02802	1.2942	1.24738	0.836451	1.15878	1.07647	1.39316	0.772681	0.427436	1.11686	0.698232	0.862979
258	59.47	60.47	53.08	44.06	41.44	sp|Q9BXP5|SRRT_HUMAN	Serrate RNA effector molecule homolog OS=Homo sapiens GN=SRRT PE=1 SV=1	HUMAN	38			0.887156	0.739008	1.13763	0.794328	1.00925	1.33045	0.130509	1.19124	1.11686	1.49968	1.92309	0.00187173	1.34276	1.43219	2.80543	0.847227	0.451698	1.08643	0.77983	0.92045	0.903649	0.957221	1.20226	0.824138	1.08643	1.65959	0.0697003	1.31826	1.25893	2.1677	1.04713	0.0445803	1.19124	0.879023	1.35519
259	59.39	59.63	58.39	52.05	46.69	sp|Q08945|SSRP1_HUMAN	FACT complex subunit SSRP1 OS=Homo sapiens GN=SSRP1 PE=1 SV=1	HUMAN	40			0.981748	0.584277	1.0666	0.92045	1.04713	1.04713	0.268307	1.07647	0.972747	1.11686	1.14815	0.18627	1.08643	1.05682	1.24738	0.343558	0.000161831	1.5417	0.275423	0.529663	0.349945	0.000274956	1.5417	0.280543	0.539511	1	0.835262	1.0666	0.937562	1.0666	0.660693	0.2568	1.13763	0.597035	0.751623
260	59.34	61.05	61.22	54.67	48.22	sp|P56192|SYMC_HUMAN	Methionyl-tRNA synthetase, cytoplasmic OS=Homo sapiens GN=MARS PE=1 SV=2	HUMAN	50			1.1272	0.562444	1.10662	1.01859	1.30617	1.01859	0.537433	1.08643	0.937562	1.18032	1.03753	0.907835	1.08643	0.954993	1.14815	0.654636	0.0286425	1.14815	0.559758	0.751623	0.570164	0.00377877	1.24738	0.47863	0.711214	0.794328	0.0658458	1.08643	0.724436	0.862979	0.432514	0.0131774	1.43219	0.356451	0.619441
261	59.29	59.35	96.15	95.88	90.11	sp|P04075|ALDOA_HUMAN	Fructose-bisphosphate aldolase A OS=Homo sapiens GN=ALDOA PE=1 SV=2	HUMAN	102			1.40605	0.133898	1.05682	1.33045	1.49968	0.570164	0.296382	1.05682	0.539511	0.60256	0.608135	0.119945	1.05682	0.580764	0.642688	1.35519	0.142543	1.05682	1.28233	1.43219	0.92045	0.681802	1.03753	0.887156	0.954993	1.03753	0.746276	1.04713	0.990832	1.08643	1.6293	0.16115	1.0666	1.52757	1.7378
262	59.2	59.76	35.31	22.46	17.95	sp|Q9BTC0|DIDO1_HUMAN	Death-inducer obliterator 1 OS=Homo sapiens GN=DIDO1 PE=1 SV=5	HUMAN	33			1.07647	0.430916	1.1695	0.92045	1.24738	1.23595	0.0227552	1.1695	1.05682	1.40605	1.83654	0.000531933	1.40605	1.30617	2.35505	0.937562	0.834235	1.13763	0.816582	1.0666	1.04713	0.556773	1.14815	0.912011	1.19124	0.92045	0.683114	1.15878	0.772681	1.0666	1.15878	0.274603	1.14815	1.00925	1.33045
263	59.19	63.48	48.49	36.14	29.44	sp|Q9NVI1|FANCI_HUMAN	Fanconi anemia group I protein OS=Homo sapiens GN=FANCI PE=1 SV=4	HUMAN	44			0.937562	0.871513	1.11686	0.831764	1.04713	1.05682	0.678452	1.13763	0.928966	1.20226	1.0666	0.812921	1.13763	0.937562	1.21339	0.30761	0.000151089	1.61436	0.210863	0.496592	0.313329	1.59958e-05	1.65959	0.195884	0.519996	0.990832	0.860762	1.11686	0.879023	1.10662	0.529663	0.109318	1.30617	0.440555	0.691831
264	59.06	60.28	58.85	54.66	46.27	sp|P04264|K2C1_HUMAN	Keratin, type II cytoskeletal 1 OS=Homo sapiens GN=KRT1 PE=1 SV=6	HUMAN	46			0.77983	0.349629	1.15878	0.685488	0.903649	0.672977	0.0175086	1.23595	0.461318	0.831764	0.465586	0.0270656	1.52757	0.334195	0.711214	1.95884	0.00121158	1.34276	1.45881	2.67917	1.31826	0.713296	1.1695	1.1272	1.58489	1.19124	0.704555	1.11686	1.0666	1.36773	0.912011	0.572869	1.09648	0.831764	1
265	59.04	59.33	66.38	55.91	43.47	sp|P46087|NOP2_HUMAN	Putative ribosomal RNA methyltransferase NOP2 OS=Homo sapiens GN=NOP2 PE=1 SV=2	HUMAN	48			0.870964	0.230634	1.08643	0.816582	0.946237	0.972747	0.954565	1.05682	0.912011	1.02802	1.41906	0.00500498	1.13763	1.24738	1.6293	0.549541	0.00454772	1.25893	0.436516	0.691831	0.343558	0.000153727	1.52757	0.270396	0.524807	0.452898	0.000679842	1.36773	0.380189	0.619441	0.420727	0.000247952	1.34276	0.353183	0.564937
266	58.85	59.13	76.65	71.55	62.21	sp|Q15233|NONO_HUMAN	Non-POU domain-containing octamer-binding protein OS=Homo sapiens GN=NONO PE=1 SV=4	HUMAN	57			1.15878	0.735448	1.13763	1.01859	1.34276	1.52757	0.468142	1.25893	1.21339	1.77011	1.94089	0.0132835	1.34276	1.44544	2.35505	1.18032	0.927431	1.10662	1.0666	1.36773	1.36773	0.930279	1.20226	1.13763	1.61436	1.51356	0.574745	1.25893	1.20226	1.83654	0.981748	0.719161	1.09648	0.912011	1.07647
267	58.61	58.64	79.55	75.28	62.92	sp|P50395|GDIB_HUMAN	Rab GDP dissociation inhibitor beta OS=Homo sapiens GN=GDI2 PE=1 SV=2	HUMAN	46			1.11686	0.0754027	1.07647	1.03753	1.21339	0.340408	0.000213307	1.45881	0.235505	0.496592	0.580764	0.0297917	1.2942	0.465586	0.751623	0.879023	0.965028	1.11686	0.787046	0.981748	0.685488	0.0972328	1.21339	0.559758	0.831764	0.724436	0.151417	1.20226	0.580764	0.870964	0.630957	0.119739	1.21339	0.539511	0.765597
268	58.48	59.57	57.62	44.92	33.49	sp|Q9BXJ9|NAA15_HUMAN	N-alpha-acetyltransferase 15, NatA auxiliary subunit OS=Homo sapiens GN=NAA15 PE=1 SV=1	HUMAN	38			1.2942	0.0242075	1.10662	1.1695	1.40605	0.613762	0.0364435	1.21339	0.483059	0.744732	0.654636	0.0490125	1.1695	0.549541	0.765597	0.428549	3.43359e-05	1.31826	0.310456	0.564937	0.448745	5.23681e-05	1.35519	0.340408	0.608135	0.383707	7.72049e-05	1.5417	0.280543	0.591562	0.272898	0.000108655	1.45881	0.201372	0.398107
269	58.45	62.21	36.41	22.95	16.01	sp|P42345|MTOR_HUMAN	Serine/threonine-protein kinase mTOR OS=Homo sapiens GN=MTOR PE=1 SV=1	HUMAN	39			0.903649	0.950495	1.18032	0.772681	1.0666	0.724436	0.21178	1.28233	0.60256	0.928966	0.744732	0.603833	1.21339	0.636796	0.903649	0.912011	0.462733	1.18032	0.772681	1.07647	0.608135	0.0915183	1.39316	0.501187	0.847227	0.954993	0.946679	1.18032	0.809096	1.1272	0.666807	0.541252	1.27057	0.559758	0.847227
270	58.43	58.65	87.21	84.19	76.51	sp|P00505|AATM_HUMAN	Aspartate aminotransferase, mitochondrial OS=Homo sapiens GN=GOT2 PE=1 SV=3	HUMAN	76			0.619441	0.9767	1.09648	0.570164	0.679204	1.15878	0.201889	1.05682	1.09648	1.22462	1.05682	0.09763	1.05682	1	1.11686	1.05682	0.219675	1.0666	0.990832	1.11686	1	0.242624	1.05682	0.946237	1.05682	2.14783	8.92301e-05	1.15878	1.85353	2.37684	0.870964	0.0228602	1.0666	0.816582	0.928966
271	58.35	58.9	79.56	70.44	66.5	sp|P60842|IF4A1_HUMAN	Eukaryotic initiation factor 4A-I OS=Homo sapiens GN=EIF4A1 PE=1 SV=1	HUMAN	77			1.20226	0.451108	1.10662	1.08643	1.33045	0.457088	0.00565663	1.47231	0.349945	0.672977	0.751623	0.266768	1.13763	0.679204	0.855067	0.529663	0.00914525	1.28233	0.432514	0.679204	0.440555	0.00383852	1.43219	0.310456	0.630957	0.428549	0.0014305	1.47231	0.296483	0.630957	0.37325	0.00272106	1.55597	0.244343	0.580764
272	58.33	59.52	33.42	25.81	20.33	sp|Q12888|TP53B_HUMAN	Tumor suppressor p53-binding protein 1 OS=Homo sapiens GN=TP53BP1 PE=1 SV=2	HUMAN	34			1	0.86979	1.13763	0.879023	1.18032	1.0666	0.945979	1.15878	0.92045	1.25893	1.43219	0.107606	1.25893	1.13763	2.10863	1.47231	0.129156	1.2942	1.13763	2.01372	1.72187	0.0199277	1.35519	1.27057	2.83139	1.67494	0.014188	1.34276	1.24738	2.46604	1.57036	0.0648598	1.31826	1.19124	2.26986
273	57.96	58.23	58.61	51.95	35.66	sp|P29317|EPHA2_HUMAN	Ephrin type-A receptor 2 OS=Homo sapiens GN=EPHA2 PE=1 SV=2	HUMAN	36			0.724436	0.823909	1.15878	0.580764	0.83946	0.737904	0.850348	1.24738	0.60256	0.92045	1.03753	0.497981	1.10662	0.937562	1.15878	2.208	1.72051e-05	1.36773	1.61436	3.34195	2.01372	9.46754e-06	1.33045	1.51356	3.01995	1.43219	0.0367506	1.19124	1.20226	1.72187	1.28233	0.0212242	1.15878	1.10662	1.57036
274	57.68	61.77	61.3	49.17	37.93	sp|P78344|IF4G2_HUMAN	Eukaryotic translation initiation factor 4 gamma 2 OS=Homo sapiens GN=EIF4G2 PE=1 SV=1	HUMAN	33			1.00925	0.462684	1.09648	0.92045	1.11686	0.724436	0.161682	1.1272	0.60256	0.816582	0.92045	0.677655	1.09648	0.83946	1.00925	0.591562	0.0117396	1.15878	0.529663	0.685488	0.666807	0.0626254	1.13763	0.559758	0.758578	0.559758	0.0272357	1.2942	0.483059	0.724436	0.401791	0.00734502	1.30617	0.337287	0.524807
275	57.63	63.34	52.47	36.85	26.77	sp|Q08378|GOGA3_HUMAN	Golgin subfamily A member 3 OS=Homo sapiens GN=GOLGA3 PE=1 SV=2	HUMAN	30			1.34276	0.772269	1.20226	1.11686	1.59956	1.57036	0.0376562	1.28233	1.22462	1.90546	2.10863	0.00370482	1.51356	1.39316	2.67917	1.80302	0.00513521	1.40605	1.28233	2.51189	1.45881	0.175422	1.24738	1.1695	1.8197	1.49968	0.258309	1.25893	1.19124	1.83654	1.21339	0.364764	1.15878	1.04713	1.39316
276	57.47	58.33	72.04	59.14	55.56	sp|P00367|DHE3_HUMAN	Glutamate dehydrogenase 1, mitochondrial OS=Homo sapiens GN=GLUD1 PE=1 SV=2	HUMAN	53			0.887156	0.785196	1.08643	0.801678	0.963829	1.10662	0.196259	1.10662	1	1.2942	1.5417	0.0333596	1.24738	1.23595	2.07014	1.24738	0.41769	1.1695	1.0666	1.47231	1.2942	0.297943	1.19124	1.08643	1.58489	1.7378	0.0024007	1.31826	1.31826	2.35505	1.18032	0.157709	1.10662	1.0666	1.31826
277	57.41	62.6	61.69	49.43	43.68	sp|Q8TCS8|PNPT1_HUMAN	Polyribonucleotide nucleotidyltransferase 1, mitochondrial OS=Homo sapiens GN=PNPT1 PE=1 SV=2	HUMAN	39			0.903649	0.943248	1.10662	0.787046	1	0.824138	0.953256	1.14815	0.744732	0.946237	1.41906	0.00860216	1.13763	1.24738	1.6293	0.630957	0.179443	1.19124	0.524807	0.751623	0.704693	0.389423	1.1272	0.608135	0.794328	1.10662	0.525564	1.08643	1.01859	1.20226	0.613762	0.156392	1.1272	0.529663	0.691831
278	57.37	58.97	62.18	57.44	50.38	sp|Q99798|ACON_HUMAN	Aconitate hydratase, mitochondrial OS=Homo sapiens GN=ACO2 PE=1 SV=2	HUMAN	49			0.564937	0.436482	1.28233	0.444631	0.724436	0.990832	0.887152	1.09648	0.903649	1.08643	1.49968	0.139343	1.22462	1.22462	1.90546	1.95884	0.00515136	1.33045	1.47231	2.75423	1.6293	0.0201948	1.28233	1.27057	2.26986	2.77971	9.33928e-06	1.48594	1.87068	4.32514	2.01372	0.000421942	1.36773	1.47231	2.75423
279	57.35	57.63	74.78	70.89	66.86	sp|P42166|LAP2A_HUMAN	Lamina-associated polypeptide 2, isoform alpha OS=Homo sapiens GN=TMPO PE=1 SV=2	HUMAN	55			0.679204	0.473577	1.2942	0.549541	0.879023	1.31826	0.177139	1.1695	1.1272	1.65959	1.45881	0.0258188	1.20226	1.21339	2.01372	0.679204	0.391817	1.24738	0.554626	0.847227	0.580764	0.239321	1.36773	0.457088	0.794328	1.10662	0.16306	1.1272	0.981748	1.36773	0.879023	0.732315	1.13763	0.772681	1
280	57.33	61.83	59.3	34.91	21.27	sp|Q92878|RAD50_HUMAN	DNA repair protein RAD50 OS=Homo sapiens GN=RAD50 PE=1 SV=1	HUMAN	28			0.937562	0.677797	1.1272	0.831764	1.05682	1.47231	0.0039054	1.25893	1.1695	2.05116	1.2942	0.0378345	1.19124	1.08643	1.64437	0.862979	0.848849	1.15878	0.737904	1	1.14815	0.865793	1.1695	0.981748	1.35519	1.6293	0.00232489	1.31826	1.23595	2.48886	1.36773	0.0372051	1.22462	1.11686	1.90546
281	57.27	58.25	56.03	47.73	35.28	sp|Q9NSE4|SYIM_HUMAN	Isoleucyl-tRNA synthetase, mitochondrial OS=Homo sapiens GN=IARS2 PE=1 SV=2	HUMAN	36			0.903649	0.594192	1.10662	0.824138	1	1.52757	0.389737	1.33045	1.14815	1.77011	1.64437	0.166397	1.33045	1.23595	1.97697	1.39316	0.207136	1.21339	1.14815	1.59956	1.49968	0.264539	1.28233	1.1695	1.75388	1.90546	0.0181485	1.40605	1.35519	2.39883	1.20226	0.412352	1.1695	1.02802	1.35519
282	57	59.35	48.12	36.63	28.41	sp|Q7L576|CYFP1_HUMAN	Cytoplasmic FMR1-interacting protein 1 OS=Homo sapiens GN=CYFIP1 PE=1 SV=1	HUMAN	36			0.862979	0.666981	1.22462	0.679204	1.05682	0.824138	0.274694	1.22462	0.672977	1.00925	0.539511	0.0819201	1.47231	0.337287	0.794328	0.887156	0.56971	1.20226	0.731139	1.0666	0.731139	0.0416969	1.28233	0.534564	0.937562	0.744732	0.0793062	1.27057	0.452898	0.946237	0.711214	0.0862309	1.2942	0.47863	0.92045
283	56.91	58.24	78.04	72.06	64.67	sp|P14868|SYDC_HUMAN	Aspartyl-tRNA synthetase, cytoplasmic OS=Homo sapiens GN=DARS PE=1 SV=2	HUMAN	38			0.937562	0.771394	1.08643	0.847227	1.01859	0.744732	0.326912	1.14815	0.660693	0.855067	0.801678	0.501292	1.10662	0.704693	0.887156	0.465586	0.0133304	1.39316	0.346737	0.648634	0.465586	0.0360557	1.43219	0.349945	0.666807	0.613762	0.119917	1.24738	0.496592	0.765597	0.554626	0.272319	1.35519	0.474242	0.751623
284	56.75	58.6	54.74	42.57	35.29	sp|Q9HCE1|MOV10_HUMAN	Putative helicase MOV-10 OS=Homo sapiens GN=MOV10 PE=1 SV=2	HUMAN	38			0.954993	0.930215	1.11686	0.855067	1.0666	0.870964	0.844848	1.1272	0.787046	0.981748	0.963829	0.474312	1.14815	0.862979	1.10662	0.737904	0.121048	1.19124	0.660693	0.879023	0.564937	0.0751266	1.39316	0.487529	0.787046	0.724436	0.138837	1.21339	0.613762	0.879023	0.679204	0.296561	1.23595	0.597035	0.83946
285	56.36	58.79	75.1	64.1	58.05	sp|P28331|NDUS1_HUMAN	NADH-ubiquinone oxidoreductase 75 kDa subunit, mitochondrial OS=Homo sapiens GN=NDUFS1 PE=1 SV=3	HUMAN	38			1.07647	0.790598	1.09648	0.981748	1.18032	1.40605	0.150733	1.10662	1.27057	1.5417	0.787046	0.0520863	1.1272	0.654636	0.887156	1.58489	0.0210003	1.15878	1.36773	1.83654	1.57036	0.00805992	1.20226	1.30617	1.85353	0.794328	0.0511722	1.14815	0.698232	0.912011	0.394457	0.00231226	1.39316	0.30761	0.549541
286	56.14	57.4	59.32	53.15	44.87	sp|P45974|UBP5_HUMAN	Ubiquitin carboxyl-terminal hydrolase 5 OS=Homo sapiens GN=USP5 PE=1 SV=2	HUMAN	33			0.862979	0.936026	1.11686	0.772681	0.963829	0.654636	0.0811673	1.1695	0.534564	0.765597	0.654636	0.356135	1.21339	0.554626	0.794328	1.09648	0.4632	1.10662	0.990832	1.22462	0.549541	0.311847	1.40605	0.461318	0.772681	0.912011	0.672858	1.09648	0.816582	1	0.724436	0.776224	1.23595	0.60256	0.895365
287	56.11	59.19	40.05	28.06	21.03	sp|Q8NI27|THOC2_HUMAN	THO complex subunit 2 OS=Homo sapiens GN=THOC2 PE=1 SV=2	HUMAN	33			0.737904	0.638974	1.18032	0.636796	0.870964	1.00925	0.390295	1.14815	0.879023	1.14815	1.34276	0.0167542	1.14815	1.1695	1.57036	0.597035	0.559087	1.22462	0.515229	0.731139	0.83946	0.759507	1.13763	0.744732	0.954993	1.11686	0.882646	1.1272	0.990832	1.25893	0.57544	0.203827	1.27057	0.452898	0.731139
288	56.08	60.23	70.03	58.33	43.82	sp|P46459|NSF_HUMAN	Vesicle-fusing ATPase OS=Homo sapiens GN=NSF PE=1 SV=3	HUMAN	37			0.954993	0.683918	1.11686	0.831764	1.0666	0.570164	0.276814	1.19124	0.510505	0.679204	0.816582	0.9277	1.1272	0.731139	0.92045	1.1695	0.556785	1.09648	1.0666	1.2942	1.45881	0.61719	1.14815	1.27057	1.61436	1.75388	0.021587	1.22462	1.43219	1.99526	1.45881	0.238937	1.1695	1.24738	1.64437
289	55.96	62.09	57.43	47.67	44.55	sp|P23246|SFPQ_HUMAN	Splicing factor, proline- and glutamine-rich OS=Homo sapiens GN=SFPQ PE=1 SV=2	HUMAN	64			0.809096	0.987303	1.09648	0.758578	0.887156	0.895365	0.824541	1.07647	0.824138	0.963829	1.27057	0.0620458	1.07647	1.18032	1.41906	0.772681	0.768584	1.1272	0.711214	0.870964	0.816582	0.972739	1.07647	0.737904	0.879023	0.591562	0.248102	1.25893	0.505825	0.744732	0.613762	0.201615	1.19124	0.549541	0.731139
290	55.9	56.16	90.42	85.05	77.8	sp|Q13838|DX39B_HUMAN	Spliceosome RNA helicase DDX39B OS=Homo sapiens GN=DDX39B PE=1 SV=1	HUMAN	107			0.928966	0.774944	1.09648	0.855067	1.01859	1.19124	0.547087	1.14815	1.03753	1.31826	1.55597	0.0845557	1.21339	1.28233	1.80302	0.83946	0.977672	1.08643	0.77983	0.912011	0.870964	0.956309	1.08643	0.801678	0.946237	1.19124	0.196897	1.15878	1.02802	1.38038	0.452898	0.700349	1.11686	0.420727	0.505825
291	55.88	56.95	49.14	35.16	29.36	sp|Q92797|SYMPK_HUMAN	Symplekin OS=Homo sapiens GN=SYMPK PE=1 SV=2	HUMAN	41			0.698232	0.136818	1.1272	0.613762	0.787046	0.981748	0.833137	1.11686	0.879023	1.09648	1.28233	0.120957	1.14815	1.11686	1.43219	1.09648	0.288042	1.11686	0.981748	1.22462	1.23595	0.875172	1.11686	1.10662	1.38038	1.43219	0.0841997	1.11686	1.28233	1.61436	0.855067	0.930013	1.1272	0.765597	0.963829
292	55.75	58.16	73.67	62.28	56.78	sp|P12081|SYHC_HUMAN	Histidyl-tRNA synthetase, cytoplasmic OS=Homo sapiens GN=HARS PE=1 SV=2	HUMAN	36			1.1272	0.58603	1.09648	1.02802	1.23595	0.519996	0.12391	1.45881	0.42462	0.758578	0.591562	0.0598882	1.2942	0.505825	0.765597	0.847227	0.72221	1.14815	0.765597	0.972747	0.591562	0.102269	1.2942	0.519996	0.765597	0.870964	0.542064	1.11686	0.765597	0.972747	0.801678	0.901792	1.13763	0.724436	0.912011
293	55.74	57.16	78.67	72.94	62.01	sp|P06744|G6PI_HUMAN	Glucose-6-phosphate isomerase OS=Homo sapiens GN=GPI PE=1 SV=4	HUMAN	58			1.20226	0.164919	1.07647	1.11686	1.2942	0.501187	0.0131034	1.33045	0.416869	0.666807	0.380189	0.00111869	1.41906	0.30479	0.539511	0.625173	0.128702	1.21339	0.519996	0.758578	0.505825	0.00541559	1.30617	0.398107	0.660693	0.564937	0.0152661	1.27057	0.47863	0.717794	0.457088	0.00841096	1.23595	0.390841	0.564937
294	55.62	58.18	31.35	21.45	18.57	sp|Q14676|MDC1_HUMAN	Mediator of DNA damage checkpoint protein 1 OS=Homo sapiens GN=MDC1 PE=1 SV=3	HUMAN	34			0.972747	0.781893	1.10662	0.879023	1.07647	1.09648	0.414461	1.10662	0.990832	1.22462	1.15878	0.144789	1.10662	1.04713	1.30617	0.586138	0.0434832	1.28233	0.452898	0.751623	0.744732	0.333522	1.1272	0.608135	0.83946	1.02802	0.724535	1.14815	0.895365	1.14815	0.862979	0.7826	1.11686	0.765597	0.963829
295	55.61	58.81	81.15	76.57	75.72	sp|P14866|HNRPL_HUMAN	Heterogeneous nuclear ribonucleoprotein L OS=Homo sapiens GN=HNRNPL PE=1 SV=2	HUMAN	65			1.02802	0.578953	1.09648	0.937562	1.14815	1.20226	0.663959	1.1272	1.0666	1.33045	1.87068	0.023217	1.36773	1.36773	2.29087	1.00925	0.741767	1.07647	0.937562	1.08643	1.05682	0.449253	1.10662	0.954993	1.18032	1.18032	0.862785	1.1272	1.04713	1.30617	0.855067	0.780072	1.08643	0.787046	0.928966
296	55.57	56.08	55.41	46.58	38.74	sp|P35606|COPB2_HUMAN	Coatomer subunit beta' OS=Homo sapiens GN=COPB2 PE=1 SV=2	HUMAN	36			1.05682	0.532462	1.1272	0.937562	1.19124	0.432514	0.00192317	1.31826	0.369828	0.570164	0.685488	0.261141	1.21339	0.586138	0.831764	1.2942	0.555902	1.27057	1.01859	1.5417	1.01859	0.882973	1.15878	0.879023	1.13763	1.00925	0.832642	1.14815	0.879023	1.14815	0.972747	0.721926	1.15878	0.847227	1.1272
297	55.52	56.41	32.91	23.52	16.85	sp|Q9UIF9|BAZ2A_HUMAN	Bromodomain adjacent to zinc finger domain protein 2A OS=Homo sapiens GN=BAZ2A PE=1 SV=4	HUMAN	28			0.946237	0.690307	1.11686	0.847227	1.05682	0.981748	0.752919	1.1272	0.879023	1.10662	0.912011	0.952541	1.13763	0.772681	1.03753	0.912011	0.530973	1.1272	0.77983	1.02802	0.831764	0.282212	1.13763	0.724436	0.946237	0.92045	0.449685	1.1272	0.809096	1.03753	0.717794	0.07708	1.21339	0.505825	0.870964
298	55.51	72.39	62.05	53.33	49.4	sp|P52789|HXK2_HUMAN	Hexokinase-2 OS=Homo sapiens GN=HK2 PE=1 SV=2	HUMAN	51			1	0.818542	1.1272	0.887156	1.18032	0.981748	0.284859	1.15878	0.862979	1.13763	1.0666	0.406242	1.1272	0.946237	1.2942	0.758578	0.640241	1.22462	0.619441	0.928966	0.77983	0.100758	1.18032	0.685488	0.92045	0.524807	0.0277735	1.41906	0.413047	0.744732	0.325087	2.71603e-05	1.83654	0.201372	0.597035
300	55.5	56.63	93.31	88.96	82.94	sp|Q99623|PHB2_HUMAN	Prohibitin-2 OS=Homo sapiens GN=PHB2 PE=1 SV=2	HUMAN	51			0.586138	0.108447	1.1695	0.544503	0.685488	1.19124	0.562279	1.07647	1.10662	1.25893	0.672977	0.322033	1.14815	0.613762	0.772681	1.31826	0.156374	1.07647	1.22462	1.41906	1.1695	0.387459	1.0666	1.09648	1.24738	0.248886	0.00245271	1.58489	0.214783	0.394457	0.505825	0.175826	1.20226	0.469894	0.608135
299	55.5	60.45	48.99	34.94	21.97	sp|O75116|ROCK2_HUMAN	Rho-associated protein kinase 2 OS=Homo sapiens GN=ROCK2 PE=1 SV=4	HUMAN	30			1.19124	0.663162	1.20226	0.990832	1.48594	0.724436	0.337176	1.30617	0.591562	0.946237	0.903649	0.823803	1.15878	0.744732	1.04713	1.23595	0.129009	1.20226	1.02802	1.55597	1.22462	0.287555	1.18032	1.03753	1.43219	0.946237	0.919	1.1272	0.824138	1.0666	1.04713	0.427506	1.14815	0.912011	1.23595
301	55.47	57.13	71.04	63.71	60.31	sp|P46060|RAGP1_HUMAN	Ran GTPase-activating protein 1 OS=Homo sapiens GN=RANGAP1 PE=1 SV=1	HUMAN	53			0.990832	0.672576	1.0666	0.92045	1.05682	0.660693	0.0327049	1.22462	0.474242	0.809096	1.01859	0.576481	1.07647	0.946237	1.10662	0.765597	0.114251	1.14815	0.642688	0.879023	0.758578	0.0652358	1.14815	0.648634	0.870964	0.77983	0.0331158	1.10662	0.630957	0.862979	0.42462	0.00147059	1.5417	0.265461	0.654636
302	55.36	62.33	35.36	26.79	21.58	sp|P35658|NU214_HUMAN	Nuclear pore complex protein Nup214 OS=Homo sapiens GN=NUP214 PE=1 SV=2	HUMAN	42			0.912011	0.858864	1.11686	0.816582	1.01859	0.77983	0.310996	1.15878	0.691831	0.903649	1.07647	0.117271	1.1272	0.954993	1.23595	1	0.617362	1.11686	0.895365	1.1272	0.704693	0.233466	1.23595	0.608135	0.870964	0.847227	0.970293	1.14815	0.691831	0.972747	0.724436	0.341896	1.23595	0.613762	0.895365
303	55.35	57.47	81.85	77.74	69.18	sp|P23368|MAOM_HUMAN	NAD-dependent malic enzyme, mitochondrial OS=Homo sapiens GN=ME2 PE=1 SV=1	HUMAN	43			0.737904	0.38713	1.22462	0.619441	0.903649	0.903649	0.477136	1.14815	0.824138	1.03753	1.35519	0.229268	1.13763	1.19124	1.59956	1.44544	0.116188	1.1695	1.23595	1.87068	1.27057	0.750815	1.10662	1.14815	1.48594	1.88799	0.00869029	1.28233	1.47231	2.80543	1.08643	0.678446	1.08643	1	1.24738
304	55.28	55.78	83.66	77.34	69.28	sp|Q02790|FKBP4_HUMAN	Peptidyl-prolyl cis-trans isomerase FKBP4 OS=Homo sapiens GN=FKBP4 PE=1 SV=3	HUMAN	54			1.22462	0.0667543	1.08643	1.1272	1.34276	0.744732	0.0427392	1.14815	0.666807	0.855067	0.744732	0.392045	1.13763	0.679204	0.847227	0.549541	0.00478014	1.30617	0.452898	0.717794	0.549541	0.00285464	1.33045	0.474242	0.731139	0.685488	0.0311435	1.15878	0.613762	0.794328	0.660693	0.0745586	1.19124	0.580764	0.787046
305	55.23	59.84	71.77	58.25	46.95	sp|P08133|ANXA6_HUMAN	Annexin A6 OS=Homo sapiens GN=ANXA6 PE=1 SV=3	HUMAN	34			0.847227	0.59663	1.1272	0.717794	0.954993	0.672977	0.167124	1.20226	0.591562	0.809096	0.570164	0.56199	1.28233	0.474242	0.731139	3.22107	4.24015e-06	1.52757	2.10863	4.7863	4.09261	2.45376e-09	1.51356	2.70396	6.66807	1.13763	0.0408925	1.10662	1.02802	1.25893	1.92309	0.00298933	1.35519	1.41906	2.44343
306	55.18	57.26	81.47	80.2	74.87	sp|Q9UQ80|PA2G4_HUMAN	Proliferation-associated protein 2G4 OS=Homo sapiens GN=PA2G4 PE=1 SV=3	HUMAN	61			1.09648	0.079419	1.07647	1.01859	1.18032	0.619441	0.166988	1.14815	0.559758	0.711214	0.912011	0.74043	1.0666	0.862979	0.972747	0.313329	0.00294622	1.51356	0.207014	0.474242	0.233346	8.46628e-05	1.67494	0.158489	0.390841	0.260615	9.88807e-05	1.61436	0.177011	0.420727	0.359749	0.00282566	1.35519	0.275423	0.487529
307	54.75	57.32	67.71	59.26	43.88	sp|Q8N163|K1967_HUMAN	Protein KIAA1967 OS=Homo sapiens GN=KIAA1967 PE=1 SV=2	HUMAN	45			0.765597	0.17692	1.08643	0.679204	0.831764	0.879023	0.955088	1.10662	0.787046	0.972747	1.38038	0.00111506	1.13763	1.21339	1.51356	0.619441	0.00945984	1.18032	0.474242	0.731139	0.679204	0.027315	1.14815	0.586138	0.77983	0.937562	0.506675	1.08643	0.847227	1.01859	0.765597	0.922122	1.14815	0.642688	0.879023
308	54.71	56.37	63.69	51.34	44.84	sp|Q16666|IF16_HUMAN	Gamma-interferon-inducible protein 16 OS=Homo sapiens GN=IFI16 PE=1 SV=3	HUMAN	39			1.24738	0.137125	1.14815	1.08643	1.38038	1.13763	0.339768	1.1272	1.00925	1.28233	1.70608	0.00089401	1.23595	1.38038	1.99526	0.809096	0.232722	1.10662	0.698232	0.895365	0.963829	0.595365	1.10662	0.870964	1.0666	1.75388	0.014722	1.25893	1.39316	2.10863	1.51356	0.188031	1.20226	1.25893	1.87068
309	54.67	54.79	90.62	87.64	74.6	sp|P26641|EF1G_HUMAN	Elongation factor 1-gamma OS=Homo sapiens GN=EEF1G PE=1 SV=3	HUMAN	70			1.18032	0.270505	1.05682	1.11686	1.24738	0.420727	0.00023211	1.36773	0.340408	0.57544	0.666807	0.0539775	1.18032	0.57544	0.787046	0.401791	0.00132703	1.39316	0.325087	0.559758	0.270396	1.81353e-05	1.65959	0.207014	0.448745	0.369828	3.05107e-05	1.43219	0.275423	0.529663	0.277971	5.88551e-05	1.52757	0.224905	0.42462
310	54.62	58.98	91.57	89.16	84.94	sp|P00338|LDHA_HUMAN	L-lactate dehydrogenase A chain OS=Homo sapiens GN=LDHA PE=1 SV=2	HUMAN	92			1.1272	0.0678455	1.04713	1.07647	1.19124	0.636796	0.0347773	1.10662	0.586138	0.704693	0.704693	0.225363	1.0666	0.636796	0.751623	0.474242	0.0176987	1.22462	0.398107	0.580764	0.180302	9.97377e-06	1.45881	0.130617	0.263027	0.265461	0.000100057	1.36773	0.199526	0.363078	0.37325	0.00132431	1.24738	0.313329	0.465586
311	54.58	55.91	71.99	62.79	47.77	sp|P41250|SYG_HUMAN	Glycyl-tRNA synthetase OS=Homo sapiens GN=GARS PE=1 SV=3	HUMAN	48			1.28233	0.488456	1.13763	1.1272	1.55597	0.666807	0.0515266	1.18032	0.608135	0.787046	0.981748	0.599701	1.11686	0.879023	1.09648	0.77983	0.254275	1.10662	0.704693	0.862979	0.928966	0.509909	1.08643	0.855067	1.00925	1.02802	0.576818	1.10662	0.928966	1.1695	0.613762	0.238656	1.15878	0.549541	0.711214
312	54.55	58.59	40.38	31.03	23.54	sp|Q8TEQ6|GEMI5_HUMAN	Gem-associated protein 5 OS=Homo sapiens GN=GEMIN5 PE=1 SV=3	HUMAN	35			1.21339	0.400903	1.13763	1.0666	1.39316	0.879023	0.390135	1.1272	0.77983	0.990832	1.15878	0.687422	1.14815	1.00925	1.33045	0.42462	4.01416e-05	1.51356	0.233346	0.642688	0.432514	7.57326e-06	1.38038	0.285759	0.597035	0.440555	4.05377e-05	1.45881	0.283139	0.642688	0.340408	9.26868e-07	1.6293	0.17378	0.554626
313	54.52	56.79	68.57	64.77	60.97	sp|Q9ULV4|COR1C_HUMAN	Coronin-1C OS=Homo sapiens GN=CORO1C PE=1 SV=1	HUMAN	55			0.717794	0.217439	1.07647	0.660693	0.772681	0.685488	0.64043	1.13763	0.636796	0.77983	1.20226	0.963463	1.1272	1.0666	1.31826	2.14783	0.00179587	1.25893	1.70608	2.75423	2.42103	0.00138283	1.30617	1.85353	2.93765	2.03236	0.0228774	1.31826	1.5417	2.55859	1.22462	0.0225428	1.18032	1.03753	1.43219
314	54.46	55.27	67.99	58.42	50	sp|O75083|WDR1_HUMAN	WD repeat-containing protein 1 OS=Homo sapiens GN=WDR1 PE=1 SV=4	HUMAN	36			0.855067	0.668251	1.1272	0.758578	0.963829	0.559758	0.176758	1.36773	0.432514	0.765597	0.544503	0.0293181	1.38038	0.428549	0.751623	1.65959	0.0101864	1.21339	1.36773	1.99526	1.2942	0.0239833	1.11686	1.15878	1.40605	1.14815	0.543276	1.09648	1.04713	1.24738	0.855067	0.514718	1.10662	0.787046	0.946237
315	54.44	55.03	47.87	36.72	29.26	sp|O60841|IF2P_HUMAN	Eukaryotic translation initiation factor 5B OS=Homo sapiens GN=EIF5B PE=1 SV=4	HUMAN	31			0.787046	0.855646	1.19124	0.660693	0.937562	0.570164	0.0236183	1.31826	0.409261	0.751623	0.772681	0.0980593	1.14815	0.660693	0.887156	0.549541	0.00465675	1.2942	0.390841	0.711214	0.630957	0.0807474	1.2942	0.515229	0.816582	0.597035	0.00621671	1.25893	0.413047	0.751623	0.642688	0.0236855	1.19124	0.505825	0.765597
316	54.38	57.4	65.63	56.83	48.44	sp|O95202|LETM1_HUMAN	LETM1 and EF-hand domain-containing protein 1, mitochondrial OS=Homo sapiens GN=LETM1 PE=1 SV=1	HUMAN	40			0.903649	0.908576	1.10662	0.824138	1	0.831764	0.519436	1.10662	0.711214	0.92045	1.15878	0.143598	1.1272	1.02802	1.33045	1.15878	0.456706	1.13763	1.01859	1.25893	1.21339	0.464559	1.14815	1.05682	1.31826	0.794328	0.327049	1.14815	0.679204	0.912011	1.05682	0.443617	1.08643	0.972747	1.15878
317	54.23	57.21	79.69	73.95	65.13	sp|Q16222|UAP1_HUMAN	UDP-N-acetylhexosamine pyrophosphorylase OS=Homo sapiens GN=UAP1 PE=1 SV=3	HUMAN	43			1.39316	0.239641	1.1695	1.19124	1.55597	0.363078	0.000256677	1.55597	0.288403	0.564937	0.704693	0.0568215	1.14815	0.549541	0.809096	1.43219	0.0339162	1.18032	1.21339	1.70608	1.78649	0.00138245	1.24738	1.43219	2.05116	0.549541	0.00478186	1.28233	0.380189	0.704693	0.554626	0.0245432	1.21339	0.469894	0.672977
318	54.16	58.82	48.51	38.44	29.01	sp|O60610|DIAP1_HUMAN	Protein diaphanous homolog 1 OS=Homo sapiens GN=DIAPH1 PE=1 SV=2	HUMAN	33			1.0666	0.556629	1.1272	0.946237	1.24738	0.691831	0.699826	1.27057	0.60256	0.879023	0.83946	0.838977	1.15878	0.737904	0.972747	0.862979	0.404695	1.15878	0.758578	1	0.737904	0.280524	1.23595	0.630957	0.912011	0.963829	0.624385	1.1272	0.847227	1.08643	0.765597	0.401223	1.1695	0.554626	0.895365
319	54.12	54.26	75.75	69.89	66.4	sp|P04844|RPN2_HUMAN	Dolichyl-diphosphooligosaccharide--protein glycosyltransferase subunit 2 OS=Homo sapiens GN=RPN2 PE=1 SV=3	HUMAN	55			0.474242	0.115438	1.14815	0.401791	0.544503	1.45881	0.346819	1.27057	1.14815	1.69044	1.49968	0.190531	1.25893	1.19124	1.75388	1.92309	0.0337137	1.35519	1.41906	2.33346	1.55597	0.0308136	1.1695	1.33045	1.92309	2.22844	0.0362943	1.41906	1.57036	2.65461	1.14815	0.849315	1.23595	0.928966	1.35519
320	54.01	57.29	54.65	39.87	30.65	sp|Q9HD20|AT131_HUMAN	Probable cation-transporting ATPase 13A1 OS=Homo sapiens GN=ATP13A1 PE=1 SV=2	HUMAN	38			0.401791	0.00284022	1.59956	0.346737	0.642688	0.963829	0.626855	1.14815	0.83946	1.10662	0.765597	0.47571	1.15878	0.672977	0.887156	1.31826	0.333327	1.19124	1.10662	1.61436	0.879023	0.406416	1.15878	0.765597	1.01859	1.04713	0.895322	1.15878	0.903649	1.2942	0.630957	0.75994	1.25893	0.544503	0.794328
321	54	54.84	57.23	41.43	33.21	sp|Q7Z2Z2|ETUD1_HUMAN	Elongation factor Tu GTP-binding domain-containing protein 1 OS=Homo sapiens GN=EFTUD1 PE=1 SV=2	HUMAN	30			0.698232	0.62851	1.20226	0.57544	0.83946	0.554626	0.121238	1.34276	0.343558	0.744732	0.630957	0.153259	1.19124	0.409261	0.751623	0.912011	0.595051	1.13763	0.794328	1.03753	1.09648	0.299316	1.20226	0.912011	1.27057	0.847227	0.696793	1.14815	0.724436	0.972747	0.751623	0.563764	1.15878	0.597035	0.870964
322	53.75	54.38	73.08	66.92	62.31	sp|P55809|SCOT1_HUMAN	Succinyl-CoA:3-ketoacid-coenzyme A transferase 1, mitochondrial OS=Homo sapiens GN=OXCT1 PE=1 SV=1	HUMAN	56			0.77983	0.654613	1.15878	0.711214	0.903649	1.51356	0.121075	1.19124	1.27057	2.03236	2.31206	0.0182941	1.38038	1.67494	3.34195	1.34276	0.521101	1.1272	1.19124	1.70608	1.15878	0.236407	1.10662	1.04713	1.31826	2.29087	0.00639111	1.39316	1.64437	3.34195	1.72187	0.0426487	1.33045	1.2942	2.18776
323	53.73	54.68	70.46	60.95	47.71	sp|Q9NSD9|SYFB_HUMAN	Phenylalanyl-tRNA synthetase beta chain OS=Homo sapiens GN=FARSB PE=1 SV=3	HUMAN	32			1.00925	0.693383	1.09648	0.92045	1.11686	0.625173	0.213651	1.25893	0.519996	0.787046	0.654636	0.0919954	1.21339	0.57544	0.794328	0.328095	0.0140026	1.55597	0.242103	0.510505	0.340408	0.00571303	1.57036	0.263027	0.534564	0.483059	0.0155246	1.44544	0.398107	0.698232	0.366438	0.0410397	1.52757	0.258226	0.559758
324	53.71	57.2	93.06	90.61	90.61	sp|P63104|1433Z_HUMAN	14-3-3 protein zeta/delta OS=Homo sapiens GN=YWHAZ PE=1 SV=1	HUMAN	110			1.21339	0.795136	1.07647	1.1272	1.31826	0.387258	0.181848	1.27057	0.359749	0.49204	0.672977	0.462964	1.10662	0.625173	0.744732	2.1677	0.026517	1.28233	1.69044	2.48886	2.03236	0.103086	1.21339	1.67494	2.31206	1.72187	0.260998	1.19124	1.44544	1.92309	1.83654	0.0860813	1.20226	1.52757	2.0893
325	53.16	53.7	54.92	43.78	36.97	sp|P57740|NU107_HUMAN	Nuclear pore complex protein Nup107 OS=Homo sapiens GN=NUP107 PE=1 SV=1	HUMAN	32			1.1272	0.696548	1.14815	0.981748	1.2942	0.879023	0.831146	1.13763	0.772681	1	1.11686	0.277257	1.11686	1	1.24738	0.698232	0.444387	1.24738	0.570164	0.870964	0.765597	0.466221	1.14815	0.679204	0.879023	0.887156	0.61858	1.1272	0.794328	1	0.496592	0.461687	1.36773	0.428549	0.679204
326	53.13	54.15	71.68	68.4	62.43	sp|P28838|AMPL_HUMAN	Cytosol aminopeptidase OS=Homo sapiens GN=LAP3 PE=1 SV=3	HUMAN	37			1.1272	0.562389	1.1272	1	1.31826	0.672977	0.044587	1.1272	0.613762	0.758578	0.879023	0.554581	1.10662	0.809096	0.972747	1.07647	0.471635	1.09648	0.981748	1.19124	0.870964	0.837797	1.13763	0.765597	0.990832	1.05682	0.887408	1.07647	0.981748	1.14815	0.794328	0.86024	1.09648	0.731139	0.870964
328	52.83	52.97	85.48	79.72	73.96	sp|O60664|PLIN3_HUMAN	Perilipin-3 OS=Homo sapiens GN=PLIN3 PE=1 SV=3	HUMAN	34			1.13763	0.733014	1.10662	1.02802	1.25893	0.698232	0.0575256	1.21339	0.570164	0.847227	0.625173	0.0558504	1.28233	0.49204	0.801678	2.72898	4.2379e-05	1.55597	1.75388	3.80189	2.24905	0.000200331	1.41906	1.58489	3.04789	1.85353	0.0202335	1.39316	1.33045	2.22844	1.6293	0.00169222	1.22462	1.33045	2.10863
327	52.83	55.24	55.51	41.14	33.37	sp|Q9UDR5|AASS_HUMAN	Alpha-aminoadipic semialdehyde synthase, mitochondrial OS=Homo sapiens GN=AASS PE=1 SV=1	HUMAN	30			0.724436	0.249333	1.24738	0.549541	0.903649	0.981748	0.537403	1.11686	0.879023	1.09648	1.57036	0.00436519	1.25893	1.24738	1.83654	1.59956	0.101457	1.2942	1.23595	1.92309	1.48594	0.0340364	1.20226	1.23595	1.65959	1.8197	0.000792391	1.31826	1.38038	2.24905	1.48594	0.00804144	1.20226	1.23595	1.70608
329	52.79	54.51	49.73	39.34	35.1	sp|Q9UNX4|WDR3_HUMAN	WD repeat-containing protein 3 OS=Homo sapiens GN=WDR3 PE=1 SV=1	HUMAN	32			0.751623	0.763495	1.20226	0.625173	0.903649	0.946237	0.933097	1.09648	0.855067	1.03753	1.23595	0.0677978	1.10662	1.11686	1.38038	0.376704	0.0162709	1.36773	0.30761	0.515229	0.383707	0.0103683	1.45881	0.285759	0.559758	0.474242	0.0304667	1.39316	0.376704	0.660693	0.334195	0.00470042	1.45881	0.280543	0.487529
330	52.74	61.92	69.49	55.18	46.72	sp|O95757|HS74L_HUMAN	Heat shock 70 kDa protein 4L OS=Homo sapiens GN=HSPA4L PE=1 SV=3	HUMAN	45			1.08643	0.0907374	1.11686	0.972747	1.21339	0.794328	0.413362	1.19124	0.660693	0.946237	0.887156	0.782867	1.18032	0.765597	1.04713	0.613762	0.20718	1.38038	0.457088	0.847227	0.405509	0.00440844	1.7378	0.237684	0.704693	1	0.562005	1.10662	0.903649	1.10662	0.92045	0.271208	1.13763	0.809096	1.04713
331	52.72	55.28	49.33	38.75	31.73	sp|Q5JPE7|NOMO2_HUMAN	Nodal modulator 2 OS=Homo sapiens GN=NOMO2 PE=1 SV=1	HUMAN	38			0.824138	0.756544	1.40605	0.570164	1.15878	0.794328	0.816458	1.48594	0.524807	1.18032	0.847227	0.874361	1.49968	0.554626	1.27057	0.990832	0.869635	1.48594	0.672977	1.47231	0.724436	0.786594	1.49968	0.409261	1.08643	0.879023	0.980827	1.49968	0.586138	1.31826	0.496592	0.634543	1.69044	0.197697	0.83946
332	52.61	53.25	65.91	50.33	45.01	sp|Q96RP9|EFGM_HUMAN	Elongation factor G, mitochondrial OS=Homo sapiens GN=GFM1 PE=1 SV=2	HUMAN	36			0.83946	0.183486	1.10662	0.744732	0.928966	0.731139	0.359656	1.24738	0.625173	0.912011	1.01859	0.61857	1.10662	0.92045	1.1695	0.903649	0.365861	1.10662	0.816582	1	1.28233	0.397717	1.1272	1.13763	1.48594	1.23595	0.665629	1.14815	1.07647	1.43219	0.519996	0.0748103	1.2942	0.448745	0.672977
333	52.58	53.66	63.82	59.46	53.77	sp|Q15046|SYK_HUMAN	Lysyl-tRNA synthetase OS=Homo sapiens GN=KARS PE=1 SV=3	HUMAN	42			1.04713	0.697327	1.08643	0.963829	1.1272	0.698232	0.0861609	1.18032	0.597035	0.824138	1.01859	0.834961	1.08643	0.937562	1.10662	0.586138	0.0173006	1.19124	0.496592	0.698232	0.666807	0.0206435	1.1272	0.586138	0.751623	0.711214	0.0582173	1.15878	0.613762	0.824138	0.363078	0.00424204	1.25893	0.325087	0.457088
334	52.57	53.8	67.91	60.47	53.72	sp|P27824|CALX_HUMAN	Calnexin OS=Homo sapiens GN=CANX PE=1 SV=2	HUMAN	42			0.630957	0.0755267	1.1695	0.591562	0.737904	0.613762	0.206511	1.22462	0.564937	0.751623	1.6293	0.267931	1.28233	1.27057	2.03236	1.97697	0.0186026	1.35519	1.45881	2.53513	3.0761	0.000277352	1.57036	1.95884	4.09261	2.0893	0.0641783	1.41906	1.47231	2.67917	1.33045	0.0475188	1.15878	1.14815	1.55597
335	52.45	54.07	75.93	65.82	57.07	sp|O00567|NOP56_HUMAN	Nucleolar protein 56 OS=Homo sapiens GN=NOP56 PE=1 SV=4	HUMAN	50			0.862979	0.808335	1.07647	0.787046	0.928966	1.25893	0.312715	1.1272	1.11686	1.35519	1.48594	0.00080178	1.14815	1.2942	1.64437	0.672977	0.0722284	1.18032	0.60256	0.794328	0.564937	0.0228889	1.28233	0.448745	0.724436	1.03753	0.958603	1.0666	0.972747	1.10662	0.751623	0.441423	1.1272	0.672977	0.847227
336	52.36	54.53	82.01	60.61	53.6	sp|P54577|SYYC_HUMAN	Tyrosyl-tRNA synthetase, cytoplasmic OS=Homo sapiens GN=YARS PE=1 SV=4	HUMAN	33			1.52757	0.00998643	1.21339	1.25893	1.75388	0.60256	0.0108232	1.27057	0.505825	0.765597	0.963829	0.790315	1.08643	0.895365	1.04713	0.679204	0.115472	1.1695	0.586138	0.794328	0.672977	0.025755	1.19124	0.57544	0.801678	0.816582	0.127978	1.09648	0.751623	0.895365	0.524807	0.00346126	1.2942	0.461318	0.679204
337	52.36	52.55	52.22	45.29	38.35	sp|Q9Y5L0|TNPO3_HUMAN	Transportin-3 OS=Homo sapiens GN=TNPO3 PE=1 SV=3	HUMAN	32			1.00925	0.598639	1.15878	0.870964	1.1272	0.559758	0.132474	1.30617	0.376704	0.731139	0.580764	0.159117	1.34276	0.487529	0.77983	0.758578	0.523653	1.21339	0.636796	0.92045	0.855067	0.829538	1.1272	0.737904	0.963829	0.77983	0.519936	1.23595	0.685488	0.963829	0.554626	0.389412	1.40605	0.444631	0.77983
338	52.32	53.2	49.13	42.82	33.39	sp|Q8WUM0|NU133_HUMAN	Nuclear pore complex protein Nup133 OS=Homo sapiens GN=NUP133 PE=1 SV=2	HUMAN	30			0.92045	0.90341	1.15878	0.731139	1.0666	0.816582	0.655422	1.22462	0.698232	1	0.972747	0.140914	1.18032	0.809096	1.14815	0.704693	0.344859	1.20226	0.613762	0.847227	0.83946	0.410082	1.18032	0.704693	0.990832	0.895365	0.58014	1.13763	0.794328	1.01859	0.57544	0.181833	1.34276	0.452898	0.772681
339	52.14	57.8	42.28	27.92	19.37	sp|Q92538|GBF1_HUMAN	Golgi-specific brefeldin A-resistance guanine nucleotide exchange factor 1 OS=Homo sapiens GN=GBF1 PE=1 SV=2	HUMAN	32			1.09648	0.774637	1.15878	0.946237	1.25893	0.83946	0.251823	1.22462	0.666807	1.02802	1.04713	0.481502	1.13763	0.92045	1.19124	0.946237	0.292118	1.1272	0.831764	1.0666	1.10662	0.440978	1.15878	0.954993	1.27057	1.09648	0.304419	1.14815	0.954993	1.25893	0.831764	0.702819	1.19124	0.685488	0.990832
340	51.97	53.18	49.88	34.2	24.67	sp|Q13045|FLII_HUMAN	Protein flightless-1 homolog OS=Homo sapiens GN=FLII PE=1 SV=2	HUMAN	36			1.1695	0.912547	1.15878	1.00925	1.35519	1.27057	0.949512	1.23595	1.02802	1.48594	1.11686	0.785605	1.1695	0.954993	1.2942	1.41906	0.27452	1.19124	1.19124	1.65959	1.10662	0.587811	1.13763	0.972747	1.25893	1.48594	0.457208	1.24738	1.19124	1.8197	1.25893	0.105921	1.13763	1.10662	1.43219
341	51.91	59.13	45.39	28.73	18.17	sp|Q9Y4I1|MYO5A_HUMAN	Myosin-Va OS=Homo sapiens GN=MYO5A PE=1 SV=2	HUMAN	34			0.570164	0.0124741	1.39316	0.457088	0.794328	1.04713	0.750866	1.14815	0.912011	1.19124	0.954993	0.411891	1.14815	0.831764	1.09648	1.69044	0.0877338	1.33045	1.27057	2.33346	1.36773	0.186319	1.19124	1.14815	1.64437	1.83654	0.0191706	1.47231	1.24738	2.44343	1.08643	0.917129	1.15878	0.937562	1.25893
342	51.86	52.98	76.99	65.32	56.08	sp|P38606|VATA_HUMAN	V-type proton ATPase catalytic subunit A OS=Homo sapiens GN=ATP6V1A PE=1 SV=2	HUMAN	42			0.887156	0.466947	1.11686	0.787046	0.990832	0.77983	0.556185	1.1695	0.636796	0.912011	1.03753	0.741197	1.09648	0.946237	1.1272	2.07014	0.00180218	1.30617	1.58489	3.16228	2.60615	0.00184135	1.44544	1.80302	4.20727	2.65461	0.00196791	1.45881	1.8197	4.2462	2.208	0.00476384	1.30617	1.69044	3.19154
343	51.84	53.17	78.33	73.82	66.74	sp|O75390|CISY_HUMAN	Citrate synthase, mitochondrial OS=Homo sapiens GN=CS PE=1 SV=2	HUMAN	61			0.855067	0.417667	1.05682	0.801678	0.903649	0.691831	0.336267	1.08643	0.630957	0.751623	1.55597	0.0514361	1.11686	1.39316	1.75388	0.954993	0.651876	1.04713	0.903649	1	0.870964	0.256048	1.04713	0.831764	0.912011	1.40605	0.143416	1.11686	1.25893	1.51356	0.758578	0.425339	1.08643	0.691831	0.824138
344	51.75	52.29	75.66	66.89	57.02	sp|O00232|PSD12_HUMAN	26S proteasome non-ATPase regulatory subunit 12 OS=Homo sapiens GN=PSMD12 PE=1 SV=3	HUMAN	31			1.31826	0.433976	1.11686	1.18032	1.44544	0.660693	0.599612	1.21339	0.524807	0.801678	0.981748	0.812594	1.09648	0.870964	1.07647	1.11686	0.539132	1.08643	1.02802	1.22462	0.765597	0.389837	1.10662	0.685488	0.847227	1.2942	0.228438	1.11686	1.15878	1.43219	0.870964	0.38163	1.1272	0.77983	0.981748
345	51.65	51.81	81.29	74.1	65.47	sp|P27797|CALR_HUMAN	Calreticulin OS=Homo sapiens GN=CALR PE=1 SV=1	HUMAN	58			0.990832	0.874983	1.00925	0.981748	1	1	0.195088	1.00925	0.990832	1.00925	1.0666	0.00447552	1.00925	1.05682	1.07647	1.10662	2.22053e-05	1.00925	1.09648	1.11686	1.14815	7.10002e-07	1.00925	1.13763	1.15878	1.1272	4.23704e-06	1.00925	1.11686	1.13763	1.09648	1.23319e-05	1.00925	1.08643	1.10662
346	51.6	52.47	62.41	53.44	41.65	sp|P55884|EIF3B_HUMAN	Eukaryotic translation initiation factor 3 subunit B OS=Homo sapiens GN=EIF3B PE=1 SV=3	HUMAN	35			1.00925	0.344827	1.07647	0.937562	1.08643	0.711214	0.0225336	1.15878	0.608135	0.824138	0.77983	0.225262	1.09648	0.698232	0.855067	0.57544	0.0101324	1.25893	0.465586	0.724436	0.515229	0.00187105	1.2942	0.416869	0.666807	0.57544	0.00815698	1.25893	0.49204	0.724436	0.436516	0.000978603	1.40605	0.353183	0.613762
347	51.39	53.15	57.05	47.3	37.68	sp|Q9NW13|RBM28_HUMAN	RNA-binding protein 28 OS=Homo sapiens GN=RBM28 PE=1 SV=3	HUMAN	31			1.00925	0.447529	1.11686	0.903649	1.1695	1.08643	0.428701	1.10662	0.981748	1.24738	1.75388	3.49685e-05	1.30617	1.34276	2.44343	0.83946	0.990229	1.15878	0.737904	0.972747	0.937562	0.99758	1.10662	0.847227	1.03753	1.20226	0.2842	1.14815	1.04713	1.40605	0.816582	0.88301	1.19124	0.731139	0.972747
348	51.34	52.26	61.6	51.62	45.01	sp|O60488|ACSL4_HUMAN	Long-chain-fatty-acid--CoA ligase 4 OS=Homo sapiens GN=ACSL4 PE=1 SV=2	HUMAN	34			0.794328	0.712844	1.19124	0.679204	0.946237	1	0.805417	1.13763	0.879023	1.1272	1.22462	0.558771	1.15878	1.05682	1.58489	1.92309	0.00212895	1.33045	1.44544	2.75423	1.97697	0.0141169	1.41906	1.39316	2.67917	1.99526	0.0069182	1.39316	1.43219	2.72898	0.972747	0.553319	1.10662	0.870964	1.07647
349	51.11	53.62	57.87	47.12	37.92	sp|Q7Z2W4|ZCCHV_HUMAN	Zinc finger CCCH-type antiviral protein 1 OS=Homo sapiens GN=ZC3HAV1 PE=1 SV=3	HUMAN	30			0.809096	0.736528	1.25893	0.648634	1.01859	1.11686	0.866927	1.15878	0.963829	1.33045	0.862979	0.860355	1.20226	0.731139	1.03753	0.824138	0.214548	1.21339	0.630957	1	0.672977	0.356516	1.35519	0.544503	0.912011	0.824138	0.514818	1.24738	0.660693	1.02802	0.77983	0.52991	1.24738	0.60256	0.972747
350	50.98	51.27	49.62	39.69	36.31	sp|P53814|SMTN_HUMAN	Smoothelin OS=Homo sapiens GN=SMTN PE=1 SV=7	HUMAN	31			0.954993	0.771886	1.11686	0.855067	1.0666	1.47231	0.00130935	1.21339	1.21339	1.88799	1.48594	0.00343447	1.23595	1.20226	1.83654	0.346737	0.00193875	1.8197	0.16293	0.630957	0.409261	0.000837905	1.6293	0.183654	0.666807	1.25893	0.146664	1.14815	1.09648	1.47231	1.64437	0.00461839	1.25893	1.30617	2.14783
351	50.9	53.92	56.5	47.75	40.13	sp|O43290|SNUT1_HUMAN	U4/U6.U5 tri-snRNP-associated protein 1 OS=Homo sapiens GN=SART1 PE=1 SV=1	HUMAN	33			0.937562	0.527648	1.1272	0.809096	1.05682	0.92045	0.937833	1.11686	0.816582	1.02802	1.1272	0.197957	1.1272	1	1.25893	0.787046	0.572479	1.19124	0.642688	0.937562	0.816582	0.219344	1.13763	0.685488	0.928966	0.963829	0.80604	1.11686	0.862979	1.07647	0.855067	0.371761	1.13763	0.711214	0.972747
352	50.86	51.69	72.55	70.39	64.9	sp|P07954|FUMH_HUMAN	Fumarate hydratase, mitochondrial OS=Homo sapiens GN=FH PE=1 SV=3	HUMAN	48			1.09648	0.69741	1.08643	1.00925	1.18032	1.1695	0.728545	1.07647	1.08643	1.24738	1.69044	0.0553652	1.27057	1.33045	2.03236	1.36773	0.32609	1.21339	1.1272	1.5417	1.34276	0.448488	1.1695	1.14815	1.51356	1.72187	0.00484096	1.2942	1.33045	1.97697	1.36773	0.0743129	1.1695	1.1695	1.61436
353	50.84	51.18	52.91	47.09	43.05	sp|Q96PK6|RBM14_HUMAN	RNA-binding protein 14 OS=Homo sapiens GN=RBM14 PE=1 SV=2	HUMAN	36			1.1272	0.618937	1.1272	1	1.23595	1.25893	0.468811	1.18032	1.0666	1.45881	1.72187	0.00500329	1.27057	1.35519	2.208	0.963829	0.937015	1.08643	0.870964	1.04713	0.870964	0.882026	1.11686	0.787046	0.972747	1.27057	0.361773	1.1695	1.08643	1.48594	1.07647	0.148067	1.10662	0.972747	1.25893
354	50.82	55.63	56.09	44.6	31.38	sp|P50570|DYN2_HUMAN	Dynamin-2 OS=Homo sapiens GN=DNM2 PE=1 SV=2	HUMAN	32			0.92045	0.390231	1.09648	0.83946	1.00925	0.660693	0.094954	1.1272	0.597035	0.744732	0.510505	0.03769	1.38038	0.436516	0.704693	1.03753	0.388634	1.09648	0.946237	1.13763	0.724436	0.195741	1.1272	0.654636	0.816582	1.13763	0.663991	1.1272	1.00925	1.27057	0.717794	0.998132	1.09648	0.660693	0.787046
355	50.79	61.39	71.33	61.83	49.17	sp|Q03252|LMNB2_HUMAN	Lamin-B2 OS=Homo sapiens GN=LMNB2 PE=1 SV=3	HUMAN	40			0.580764	0.483263	1.36773	0.524807	0.794328	1.78649	0.00342154	1.30617	1.36773	2.22844	1.20226	0.166543	1.11686	1.07647	1.34276	1.72187	0.0059483	1.27057	1.35519	2.12814	1.70608	0.0255238	1.28233	1.33045	2.05116	1.6293	0.0161955	1.25893	1.2942	2.03236	1.61436	0.0122999	1.24738	1.2942	1.92309
356	50.73	51.76	86.58	80.54	67.45	sp|P05141|ADT2_HUMAN	ADP/ATP translocase 2 OS=Homo sapiens GN=SLC25A5 PE=1 SV=7	HUMAN	56			0.831764	0.375923	1.18032	0.724436	0.981748	1.03753	0.332832	1.11686	0.928966	1.15878	0.787046	0.0306347	1.1695	0.666807	0.92045	1.18032	0.149934	1.1272	1.04713	1.33045	1.47231	0.572942	1.19124	1.23595	1.77011	0.855067	0.00951414	1.15878	0.704693	0.990832	0.963829	0.0365709	1.11686	0.855067	1.07647
357	50.64	50.73	81.78	73.08	62.94	sp|P52209|6PGD_HUMAN	6-phosphogluconate dehydrogenase, decarboxylating OS=Homo sapiens GN=PGD PE=1 SV=3	HUMAN	45			1.1695	0.486154	1.09648	1.0666	1.33045	0.510505	0.00596986	1.33045	0.436516	0.679204	0.765597	0.0776412	1.10662	0.704693	0.847227	0.990832	0.418214	1.07647	0.928966	1.0666	0.794328	0.161275	1.1272	0.737904	0.895365	1.13763	0.645179	1.09648	1.03753	1.24738	0.679204	0.223652	1.1695	0.630957	0.794328
358	50.55	56.63	52.9	41.95	34.72	sp|Q99613|EIF3C_HUMAN	Eukaryotic translation initiation factor 3 subunit C OS=Homo sapiens GN=EIF3C PE=1 SV=1	HUMAN	42			1.01859	0.228263	1.07647	0.946237	1.08643	0.549541	0.019077	1.34276	0.474242	0.737904	0.685488	0.0697974	1.19124	0.586138	0.816582	0.440555	0.00642998	1.43219	0.349945	0.630957	0.47863	0.00121144	1.34276	0.376704	0.642688	0.420727	0.000242739	1.49968	0.313329	0.630957	0.469894	0.0159463	1.38038	0.387258	0.648634
359	50.51	54.06	70.3	66.29	59.71	sp|P29401|TKT_HUMAN	Transketolase OS=Homo sapiens GN=TKT PE=1 SV=3	HUMAN	49			1.2942	0.0189386	1.09648	1.18032	1.39316	0.469894	0.000720161	1.38038	0.366438	0.648634	0.855067	0.150627	1.0666	0.77983	0.912011	0.549541	0.0056319	1.28233	0.474242	0.704693	0.353183	5.52672e-05	1.51356	0.265461	0.534564	0.505825	0.000717707	1.28233	0.390841	0.648634	0.570164	0.00373333	1.23595	0.487529	0.704693
360	50.51	53.12	53.57	40.37	30.69	sp|Q02218|ODO1_HUMAN	2-oxoglutarate dehydrogenase, mitochondrial OS=Homo sapiens GN=OGDH PE=1 SV=3	HUMAN	32			0.554626	0.232797	1.19124	0.461318	0.660693	1.11686	0.60236	1.11686	1	1.23595	1.28233	0.421157	1.13763	1.1272	1.51356	1.7378	0.0104971	1.34276	1.2942	2.31206	2.03236	0.0112	1.47231	1.38038	2.75423	3.25087	1.38707e-05	1.65959	1.95884	5.05825	2.03236	0.00136992	1.43219	1.41906	2.93765
361	50.48	56.62	46.41	25.87	11.75	sp|Q13439|GOGA4_HUMAN	Golgin subfamily A member 4 OS=Homo sapiens GN=GOLGA4 PE=1 SV=1	HUMAN	26			0.831764	0.525179	1.1695	0.717794	0.972747	1.1695	0.173755	1.14815	1.01859	1.45881	0.903649	0.586236	1.1695	0.787046	1.05682	1.00925	0.405695	1.14815	0.879023	1.18032	1.30617	0.0310696	1.21339	1.07647	1.67494	1.22462	0.0706052	1.1695	1.04713	1.47231	1	0.404981	1.15878	0.862979	1.14815
362	50.38	51.72	65.77	51.1	44.01	sp|Q9NVI7|ATD3A_HUMAN	ATPase family AAA domain-containing protein 3A OS=Homo sapiens GN=ATAD3A PE=1 SV=2	HUMAN	35			0.879023	0.982656	1.19124	0.737904	1.04713	1.39316	0.269262	1.20226	1.15878	1.65959	0.461318	0.0527879	1.77011	0.30761	0.816582	0.895365	0.743151	1.23595	0.731139	1.10662	1.1272	0.515081	1.20226	0.937562	1.35519	0.383707	0.0413917	2.10863	0.285759	0.809096	0.359749	0.00921309	1.99526	0.226986	0.717794
363	50.36	53.8	80.14	71.59	68.82	sp|P35998|PRS7_HUMAN	26S protease regulatory subunit 7 OS=Homo sapiens GN=PSMC2 PE=1 SV=3	HUMAN	44			1.20226	0.307423	1.1272	1.0666	1.2942	0.420727	0.0554973	1.40605	0.359749	0.591562	0.691831	0.345942	1.18032	0.580764	0.816582	1.1272	0.252527	1.09648	1.02802	1.21339	1.01859	0.953411	1.0666	0.954993	1.08643	0.879023	0.601897	1.08643	0.77983	0.954993	0.704693	0.899449	1.1695	0.619441	0.824138
364	50.35	50.6	77.56	75.44	67.12	sp|P05091|ALDH2_HUMAN	Aldehyde dehydrogenase, mitochondrial OS=Homo sapiens GN=ALDH2 PE=1 SV=2	HUMAN	62			0.648634	0.364147	1.2942	0.580764	0.83946	1.15878	0.726402	1.13763	1.01859	1.27057	1.58489	0.0518774	1.25893	1.25893	2.05116	2.12814	3.53133e-05	1.38038	1.5417	2.91072	2.26986	4.46388e-05	1.44544	1.57036	3.19154	2.31206	2.26221e-05	1.41906	1.6293	3.34195	1.41906	0.00180801	1.18032	1.20226	1.85353
365	50.32	50.74	42.65	30.51	21.39	sp|Q14146|URB2_HUMAN	Unhealthy ribosome biogenesis protein 2 homolog OS=Homo sapiens GN=URB2 PE=1 SV=2	HUMAN	29			0.654636	0.188085	1.23595	0.564937	0.809096	1.10662	0.60224	1.14815	0.963829	1.30617	0.772681	0.974404	1.2942	0.642688	1	0.691831	0.132143	1.27057	0.591562	0.879023	0.340408	0.0039728	1.97697	0.263027	0.672977	0.758578	0.230186	1.20226	0.630957	0.912011	0.654636	0.0690304	1.30617	0.534564	0.855067
366	50.31	50.77	75.66	62.92	55.62	sp|O43242|PSMD3_HUMAN	26S proteasome non-ATPase regulatory subunit 3 OS=Homo sapiens GN=PSMD3 PE=1 SV=2	HUMAN	39			0.794328	0.829019	1.15878	0.717794	0.92045	0.428549	0.0242136	1.6293	0.356451	0.698232	0.77983	0.975107	1.18032	0.704693	0.92045	1.07647	0.338996	1.09648	0.981748	1.18032	1.00925	0.898896	1.09648	0.92045	1.11686	1.00925	0.356308	1.09648	0.92045	1.10662	0.711214	0.974102	1.25893	0.642688	0.895365
367	50.29	52.01	47.73	38.38	27.58	sp|Q5JRX3|PREP_HUMAN	Presequence protease, mitochondrial OS=Homo sapiens GN=PITRM1 PE=1 SV=2	HUMAN	29			1.00925	0.939013	1.15878	0.870964	1.31826	1.19124	0.227629	1.18032	1.00925	1.7378	1.49968	0.0432985	1.34276	1.11686	2.35505	1.88799	0.00133672	1.44544	1.30617	2.96483	1.6293	0.002131	1.31826	1.23595	2.55859	2.05116	0.000179044	1.51356	1.35519	3.7325	1.34276	0.0866323	1.23595	1.08643	2.03236
368	50.23	51.37	71.64	62.38	58.6	sp|Q9Y2X3|NOP58_HUMAN	Nucleolar protein 58 OS=Homo sapiens GN=NOP58 PE=1 SV=1	HUMAN	43			1.10662	0.955244	1.11686	0.990832	1.23595	1.01859	0.315157	1.11686	0.912011	1.15878	1.8197	0.00104333	1.25893	1.44544	2.208	0.660693	0.212112	1.15878	0.608135	0.765597	0.666807	0.0477742	1.1272	0.608135	0.751623	1.22462	0.222341	1.15878	1.05682	1.34276	0.758578	0.164111	1.07647	0.704693	0.816582
369	50.21	51.87	39.58	25.14	16.33	sp|A3KMH1|K0564_HUMAN	Uncharacterized protein KIAA0564 OS=Homo sapiens GN=KIAA0564 PE=1 SV=2	HUMAN	31			0.77983	0.192925	1.1272	0.654636	0.879023	1.21339	0.31664	1.23595	0.981748	1.44544	1.65959	0.0969737	1.43219	1.15878	2.18776	1.2942	0.0956564	1.18032	1.09648	1.47231	1.5417	0.0928286	1.31826	1.1695	1.92309	1.1695	0.288653	1.15878	1.00925	1.36773	0.809096	0.903328	1.13763	0.654636	0.92045
370	50.16	50.82	53.96	45.81	37.9	sp|Q8IY81|RRMJ3_HUMAN	Putative rRNA methyltransferase 3 OS=Homo sapiens GN=FTSJ3 PE=1 SV=2	HUMAN	32			0.862979	0.967381	1.13763	0.751623	0.981748	1.11686	0.312194	1.08643	1.02802	1.22462	1.58489	0.013367	1.27057	1.24738	2.0893	0.870964	0.833753	1.10662	0.787046	0.963829	0.963829	0.981859	1.10662	0.870964	1.0666	1.20226	0.509058	1.14815	1.04713	1.35519	0.928966	0.790382	1.1272	0.824138	1.04713
371	50.14	50.23	52.98	42.6	37.42	sp|P35221|CTNA1_HUMAN	Catenin alpha-1 OS=Homo sapiens GN=CTNNA1 PE=1 SV=1	HUMAN	34			1.03753	0.330123	1.22462	0.847227	1.28233	0.954993	0.850336	1.23595	0.737904	1.18032	0.954993	0.89757	1.22462	0.772681	1.1695	0.672977	0.166784	1.33045	0.363078	0.895365	0.870964	0.891386	1.24738	0.630957	1.08643	0.855067	0.65459	1.23595	0.554626	1.05682	0.524807	0.0483006	1.52757	0.195884	0.801678
372	50.12	52.23	66.87	58.09	47.46	sp|P46063|RECQ1_HUMAN	ATP-dependent DNA helicase Q1 OS=Homo sapiens GN=RECQL PE=1 SV=3	HUMAN	44			0.879023	0.72448	1.09648	0.816582	0.963829	0.744732	0.624773	1.19124	0.648634	0.887156	0.855067	0.538809	1.1272	0.772681	0.963829	0.648634	0.47402	1.28233	0.534564	0.831764	0.465586	0.131299	1.52757	0.353183	0.711214	1.08643	0.124522	1.08643	1	1.24738	1.0666	0.0899336	1.08643	0.981748	1.24738
373	50.1	52.48	76.62	58.59	52.96	sp|P49915|GUAA_HUMAN	GMP synthase [glutamine-hydrolyzing] OS=Homo sapiens GN=GMPS PE=1 SV=1	HUMAN	36			1.09648	0.225434	1.09648	1	1.20226	0.625173	0.0814376	1.23595	0.505825	0.772681	0.672977	0.0272671	1.23595	0.608135	0.831764	0.519996	0.0454228	1.35519	0.383707	0.704693	0.401791	0.00224362	1.44544	0.296483	0.580764	0.413047	0.00257282	1.49968	0.313329	0.619441	0.405509	0.0141731	1.36773	0.331131	0.554626
374	50	51.29	77.6	70.53	62.48	sp|P09622|DLDH_HUMAN	Dihydrolipoyl dehydrogenase, mitochondrial OS=Homo sapiens GN=DLD PE=1 SV=2	HUMAN	46			0.787046	0.461253	1.10662	0.704693	0.870964	0.92045	0.836536	1.08643	0.816582	1	1.40605	0.390389	1.1695	1.20226	1.61436	1.87068	0.0877534	1.2942	1.44544	2.46604	1.94089	0.107473	1.30617	1.48594	2.53513	2.12814	0.0487831	1.33045	1.59956	2.99226	1.51356	0.235947	1.1695	1.2942	1.88799
375	49.98	54.85	63.2	53.81	47.97	sp|P49321|NASP_HUMAN	Nuclear autoantigenic sperm protein OS=Homo sapiens GN=NASP PE=1 SV=2	HUMAN	36			1.01859	0.358874	1.10662	0.92045	1.1272	0.586138	0.236877	1.28233	0.487529	0.751623	0.751623	0.399879	1.15878	0.630957	0.870964	0.313329	0.0480084	1.77011	0.185353	0.554626	0.328095	0.0056431	1.67494	0.194089	0.549541	0.711214	0.903227	1.18032	0.559758	0.83946	0.77983	0.646019	1.1695	0.679204	0.912011
376	49.96	51	47.84	35.14	26.4	sp|Q9UIA9|XPO7_HUMAN	Exportin-7 OS=Homo sapiens GN=XPO7 PE=1 SV=3	HUMAN	34			1.04713	0.767373	1.13763	0.92045	1.18032	0.704693	0.337336	1.25893	0.591562	0.887156	0.505825	0.0375311	1.45881	0.409261	0.737904	0.737904	0.90469	1.22462	0.630957	0.903649	0.591562	0.0873904	1.28233	0.487529	0.758578	0.887156	0.455404	1.1272	0.77983	1	0.613762	0.0936032	1.30617	0.465586	0.801678
377	49.88	50.7	55.53	47.49	38.94	sp|Q96QK1|VPS35_HUMAN	Vacuolar protein sorting-associated protein 35 OS=Homo sapiens GN=VPS35 PE=1 SV=2	HUMAN	41			0.758578	0.336022	1.18032	0.660693	0.895365	0.831764	0.467522	1.1695	0.731139	0.972747	0.870964	0.464655	1.11686	0.77983	0.972747	0.77983	0.973479	1.19124	0.679204	0.928966	0.92045	0.818396	1.1272	0.824138	1.03753	1.03753	0.585966	1.11686	0.928966	1.23595	0.57544	0.828275	1.33045	0.501187	0.765597
378	49.88	50.32	57.93	42.93	32.32	sp|Q9BUQ8|DDX23_HUMAN	Probable ATP-dependent RNA helicase DDX23 OS=Homo sapiens GN=DDX23 PE=1 SV=3	HUMAN	28			0.954993	0.566807	1.10662	0.83946	1.05682	1.57036	0.118125	1.19124	1.31826	1.85353	1.75388	0.00255758	1.24738	1.40605	2.0893	0.981748	0.716467	1.1272	0.879023	1.10662	1.33045	0.227712	1.13763	1.1695	1.52757	1.67494	0.0110753	1.19124	1.40605	1.92309	1.15878	0.386275	1.09648	1.05682	1.36773
379	49.72	50.04	87.91	76.47	72.55	sp|P07910|HNRPC_HUMAN	Heterogeneous nuclear ribonucleoproteins C1/C2 OS=Homo sapiens GN=HNRNPC PE=1 SV=4	HUMAN	73			0.981748	0.336498	1.00925	0.972747	0.990832	1.00925	0.329678	1.00925	1	1.01859	1.05682	0.000386255	1.00925	1.04713	1.0666	1	0.741296	1.00925	0.990832	1.00925	0.990832	0.707328	1.00925	0.981748	1	1	0.692634	1.00925	0.990832	1.00925	1	0.960877	1.00925	0.990832	1.00925
380	49.68	58.35	82.73	80.54	68.13	sp|P38919|IF4A3_HUMAN	Eukaryotic initiation factor 4A-III OS=Homo sapiens GN=EIF4A3 PE=1 SV=4	HUMAN	50			1.25893	0.478745	1.09648	1.14815	1.38038	1.61436	0.0785082	1.25893	1.28233	1.87068	2.07014	0.00639798	1.33045	1.55597	2.65461	0.544503	0.286749	1.33045	0.452898	0.724436	0.731139	0.461596	1.19124	0.642688	0.870964	1.30617	0.317648	1.13763	1.14815	1.51356	1.10662	0.557552	1.09648	1.00925	1.27057
381	49.62	49.79	87.69	80.99	74.95	sp|P61978|HNRPK_HUMAN	Heterogeneous nuclear ribonucleoprotein K OS=Homo sapiens GN=HNRNPK PE=1 SV=1	HUMAN	96			1	0.92932	1.00925	0.990832	1.00925	1	0.916319	1.00925	0.990832	1.00925	1.04713	0.0249942	1.00925	1.03753	1.05682	0.972747	0.0160189	1.00925	0.963829	0.981748	0.963829	0.00517291	1.00925	0.954993	0.972747	0.981748	0.0591445	1.00925	0.972747	0.990832	0.990832	0.507579	1.00925	0.981748	1
382	49.53	51.75	47.75	31.62	27.12	sp|Q9Y2W1|TR150_HUMAN	Thyroid hormone receptor-associated protein 3 OS=Homo sapiens GN=THRAP3 PE=1 SV=2	HUMAN	29			0.847227	0.601029	1.13763	0.765597	0.963829	0.870964	0.633791	1.1272	0.787046	0.981748	1.28233	0.0132832	1.10662	1.15878	1.43219	0.990832	0.74137	1.08643	0.92045	1.07647	1.13763	0.265209	1.10662	1.02802	1.25893	1.08643	0.461356	1.08643	1	1.20226	1.03753	0.240212	1.07647	0.963829	1.11686
383	49.52	51.98	93.38	90.81	88.97	sp|P35232|PHB_HUMAN	Prohibitin OS=Homo sapiens GN=PHB PE=1 SV=1	HUMAN	59			0.501187	0.0573048	1.2942	0.42462	0.648634	1.1695	0.253327	1.07647	1.08643	1.33045	0.685488	0.072432	1.1272	0.625173	0.772681	1.27057	0.13883	1.09648	1.15878	1.41906	1.25893	0.566464	1.10662	1.13763	1.41906	0.337287	0.000255918	1.2942	0.301995	0.436516	0.448745	0.0251113	1.22462	0.398107	0.549541
384	49.35	55.55	79.02	72.38	57.87	sp|Q96I24|FUBP3_HUMAN	Far upstream element-binding protein 3 OS=Homo sapiens GN=FUBP3 PE=1 SV=2	HUMAN	40			1.05682	0.435722	1.10662	0.954993	1.21339	1.15878	0.328019	1.1272	1.02802	1.35519	1.31826	0.145696	1.19124	1.10662	1.5417	1.51356	0.104272	1.24738	1.21339	1.99526	1.59956	0.0801467	1.2942	1.23595	2.14783	1.55597	0.0379289	1.2942	1.20226	1.95884	1.1695	0.171114	1.1272	1.03753	1.43219
385	49.16	50.25	41.29	27.94	17.15	sp|Q14997|PSME4_HUMAN	Proteasome activator complex subunit 4 OS=Homo sapiens GN=PSME4 PE=1 SV=2	HUMAN	26			1.33045	0.972843	1.30617	1.01859	1.59956	0.847227	0.215886	1.14815	0.731139	0.972747	0.57544	0.0023134	1.30617	0.436516	0.751623	0.990832	0.62177	1.1695	0.855067	1.15878	1.01859	0.296842	1.1695	0.870964	1.19124	0.92045	0.249441	1.15878	0.794328	1.0666	0.816582	0.078731	1.21339	0.597035	0.990832
387	49.12	50.3	49.18	38.14	29.74	sp|Q6PKG0|LARP1_HUMAN	La-related protein 1 OS=Homo sapiens GN=LARP1 PE=1 SV=2	HUMAN	30			1.11686	0.318429	1.15878	0.963829	1.27057	0.704693	0.194678	1.23595	0.586138	0.870964	0.77983	0.491316	1.15878	0.672977	0.903649	0.737904	0.120143	1.20226	0.559758	0.887156	0.870964	0.253598	1.14815	0.711214	1	0.519996	0.0292347	1.38038	0.383707	0.717794	0.416869	0.0848706	1.59956	0.293765	0.666807
386	49.12	53.71	41.11	30.5	23.48	sp|Q14692|BMS1_HUMAN	Ribosome biogenesis protein BMS1 homolog OS=Homo sapiens GN=BMS1 PE=1 SV=1	HUMAN	30			1.03753	0.271066	1.13763	0.912011	1.1695	0.981748	0.565366	1.11686	0.879023	1.09648	1.14815	0.135355	1.11686	1.02802	1.2942	0.469894	0.256271	1.49968	0.353183	0.704693	0.580764	0.159138	1.31826	0.448745	0.765597	0.666807	0.439909	1.25893	0.529663	0.83946	0.398107	0.161308	1.52757	0.275423	0.608135
388	49.1	51.07	57.59	45.19	40.76	sp|Q09161|NCBP1_HUMAN	Nuclear cap-binding protein subunit 1 OS=Homo sapiens GN=NCBP1 PE=1 SV=1	HUMAN	37			1.18032	0.88289	1.09648	1.07647	1.2942	1.04713	0.516014	1.09648	0.954993	1.15878	1.36773	0.171858	1.1272	1.21339	1.52757	0.630957	0.566257	1.23595	0.559758	0.77983	0.83946	0.640822	1.13763	0.758578	0.954993	1.2942	0.200749	1.1272	1.14815	1.45881	0.772681	0.606149	1.10662	0.691831	0.855067
389	49.07	50.09	35.15	20.98	12.49	sp|Q8N3C0|HELC1_HUMAN	Activating signal cointegrator 1 complex subunit 3 OS=Homo sapiens GN=ASCC3 PE=1 SV=3	HUMAN	24			1.24738	0.571633	1.20226	1.03753	1.47231	0.895365	0.166334	1.1695	0.704693	1.04713	0.981748	0.493569	1.18032	0.824138	1.15878	1.04713	0.255613	1.24738	0.83946	1.27057	1.1272	0.896814	1.20226	0.937562	1.35519	0.92045	0.278052	1.1695	0.765597	1.07647	0.580764	0.0714913	1.38038	0.47863	0.801678
390	49.05	51.36	67.64	54.44	45.97	sp|O95573|ACSL3_HUMAN	Long-chain-fatty-acid--CoA ligase 3 OS=Homo sapiens GN=ACSL3 PE=1 SV=3	HUMAN	34			0.83946	0.23876	1.09648	0.772681	0.92045	1.01859	0.87161	1.11686	0.912011	1.18032	1.25893	0.883638	1.18032	1.0666	1.44544	1.97697	0.000624865	1.38038	1.43219	2.77971	2.29087	0.000589266	1.52757	1.49968	3.16228	1.80302	0.0921502	1.38038	1.30617	2.46604	1.41906	0.0359663	1.23595	1.14815	1.70608
391	49.03	50.95	78.07	63.18	57.12	sp|P09960|LKHA4_HUMAN	Leukotriene A-4 hydrolase OS=Homo sapiens GN=LTA4H PE=1 SV=2	HUMAN	42			1.04713	0.586413	1.10662	0.946237	1.19124	0.487529	0.0990474	1.45881	0.387258	0.711214	0.534564	0.0868342	1.35519	0.440555	0.724436	0.642688	0.208466	1.22462	0.559758	0.787046	0.591562	0.108945	1.30617	0.515229	0.772681	0.717794	0.392511	1.19124	0.613762	0.855067	0.49204	0.326053	1.49968	0.416869	0.737904
392	49.02	49.18	88.46	83.14	75.74	sp|P40926|MDHM_HUMAN	Malate dehydrogenase, mitochondrial OS=Homo sapiens GN=MDH2 PE=1 SV=3	HUMAN	67			0.981748	0.633658	1.00925	0.972747	0.990832	1.00925	0.264918	1.00925	1	1.01859	1.02802	0.0162951	1.00925	1.01859	1.03753	1.01859	0.0926974	1.00925	1.00925	1.02802	1.01859	0.0838111	1.00925	1.00925	1.02802	1.05682	0.000479708	1.00925	1.04713	1.0666	1.02802	0.0236673	1.00925	1.01859	1.03753
393	49.01	51.64	64.63	55.97	44.93	sp|Q9NVP1|DDX18_HUMAN	ATP-dependent RNA helicase DDX18 OS=Homo sapiens GN=DDX18 PE=1 SV=2	HUMAN	45			1.04713	0.654549	1.10662	0.946237	1.18032	0.887156	0.918718	1.10662	0.801678	0.981748	1.1695	0.00410342	1.1272	1.03753	1.41906	0.597035	0.0589942	1.23595	0.440555	0.737904	0.630957	0.0320275	1.19124	0.570164	0.751623	0.648634	0.0384035	1.18032	0.554626	0.765597	0.325087	0.000592202	1.58489	0.20893	0.515229
394	48.96	55.25	29.76	16.39	11.58	sp|P42858|HD_HUMAN	Huntingtin OS=Homo sapiens GN=HTT PE=1 SV=2	HUMAN	32			1.00925	0.526601	1.0666	0.946237	1.07647	1	0.507531	1.0666	0.937562	1.0666	0.981748	0.741057	1.07647	0.912011	1.05682	1	0.619692	1.07647	0.928966	1.07647	1.00925	0.601559	1.07647	0.937562	1.08643	1.02802	0.322997	1.0666	0.963829	1.09648	0.981748	0.648436	1.0666	0.92045	1.04713
395	48.95	49.69	56.69	45.13	40.51	sp|O43747|AP1G1_HUMAN	AP-1 complex subunit gamma-1 OS=Homo sapiens GN=AP1G1 PE=1 SV=5	HUMAN	38			0.765597	0.560907	1.21339	0.648634	0.928966	0.534564	0.134311	1.40605	0.420727	0.751623	0.685488	0.259184	1.28233	0.597035	0.879023	0.963829	0.839531	1.11686	0.870964	1.07647	0.912011	0.976716	1.1272	0.794328	1.02802	0.954993	0.473653	1.10662	0.862979	1.05682	0.847227	0.653866	1.1272	0.758578	0.954993
396	48.83	51.83	49.41	34.58	28.18	sp|P82094|TMF1_HUMAN	TATA element modulatory factor OS=Homo sapiens GN=TMF1 PE=1 SV=2	HUMAN	29			0.765597	0.541793	1.21339	0.660693	0.928966	0.642688	0.56921	1.33045	0.539511	0.855067	1.31826	0.454908	1.28233	1.02802	1.69044	1.59956	0.0940957	1.38038	1.15878	2.35505	1.33045	0.184262	1.21339	1.09648	1.8197	1.33045	0.36307	1.24738	1.0666	1.7378	0.981748	0.584122	1.21339	0.847227	1.19124
397	48.72	49.14	41.02	33.15	23.46	sp|P49790|NU153_HUMAN	Nuclear pore complex protein Nup153 OS=Homo sapiens GN=NUP153 PE=1 SV=2	HUMAN	29			0.801678	0.115712	1.19124	0.672977	0.954993	1.10662	0.671586	1.14815	0.963829	1.2942	1.21339	0.0848847	1.15878	1.04713	1.61436	0.751623	0.008314	1.22462	0.625173	0.92045	0.420727	0.00212072	1.80302	0.275423	0.758578	0.787046	0.0301738	1.19124	0.679204	0.937562	0.60256	0.0171924	1.44544	0.380189	0.870964
398	48.67	49.22	50.91	39.83	31.97	sp|Q9NXF1|TEX10_HUMAN	Testis-expressed sequence 10 protein OS=Homo sapiens GN=TEX10 PE=1 SV=2	HUMAN	30			0.809096	0.939366	1.1695	0.711214	0.946237	0.731139	0.820231	1.27057	0.60256	0.928966	0.83946	0.959403	1.1695	0.737904	0.981748	0.765597	0.263286	1.22462	0.597035	0.937562	0.731139	0.281821	1.23595	0.597035	0.903649	0.895365	0.830421	1.1272	0.787046	1.00925	0.428549	0.0721485	1.65959	0.299226	0.711214
399	48.6	53.05	36.28	22.55	15.53	sp|Q8WYP5|ELYS_HUMAN	Protein ELYS OS=Homo sapiens GN=AHCTF1 PE=1 SV=3	HUMAN	34			0.928966	0.210667	1.15878	0.691831	1.07647	1.30617	0.0586661	1.22462	1.0666	1.52757	1.23595	0.0920211	1.18032	1.04713	1.41906	0.679204	0.0163077	1.19124	0.457088	0.809096	0.608135	0.0728911	1.18032	0.487529	0.717794	1.01859	0.721555	1.1695	0.870964	1.19124	0.685488	0.439613	1.18032	0.539511	0.809096
400	48.5	51.85	65.53	60.35	47.1	sp|P23921|RIR1_HUMAN	Ribonucleoside-diphosphate reductase large subunit OS=Homo sapiens GN=RRM1 PE=1 SV=1	HUMAN	39			1.15878	0.162431	1.14815	1.00925	1.31826	1.21339	0.11514	1.15878	1.04713	1.43219	1.07647	0.275003	1.11686	0.963829	1.20226	0.376704	1.31451e-06	1.61436	0.18197	0.608135	0.275423	1.82612e-05	2.01372	0.16293	0.554626	0.751623	0.010543	1.13763	0.672977	0.855067	0.60256	0.00789743	1.31826	0.510505	0.794328
401	48.47	50.29	35.69	24.81	18.44	sp|O15031|PLXB2_HUMAN	Plexin-B2 OS=Homo sapiens GN=PLXNB2 PE=1 SV=3	HUMAN	25			0.787046	0.508789	1.23595	0.648634	0.972747	1.0666	0.420093	1.22462	0.870964	1.43219	1.48594	0.192063	1.35519	1.09648	1.99526	0.928966	0.797019	1.15878	0.772681	1.07647	1.04713	0.472737	1.18032	0.887156	1.22462	1.59956	0.0849356	1.40605	1.13763	2.208	1	0.700036	1.1695	0.855067	1.1695
402	48.46	48.54	65.11	63.49	61.87	sp|Q16658|FSCN1_HUMAN	Fascin OS=Homo sapiens GN=FSCN1 PE=1 SV=3	HUMAN	32			0.963829	0.899956	1.08643	0.879023	1.04713	0.855067	0.846884	1.15878	0.691831	0.990832	0.831764	0.645758	1.15878	0.711214	0.963829	0.887156	0.74025	1.10662	0.794328	0.981748	0.469894	0.0352343	1.40605	0.319154	0.660693	0.937562	0.945574	1.08643	0.855067	1.01859	0.787046	0.713981	1.13763	0.698232	0.895365
403	48.45	48.75	74.32	65.14	59.71	sp|Q9BTU6|P4K2A_HUMAN	Phosphatidylinositol 4-kinase type 2-alpha OS=Homo sapiens GN=PI4K2A PE=1 SV=1	HUMAN	32			0.704693	0.614175	1.24738	0.613762	0.879023	0.963829	0.902596	1.15878	0.801678	1.11686	0.847227	0.846797	1.21339	0.744732	1.02802	2.12814	0.00115744	1.33045	1.59956	3.16228	2.60615	0.000174155	1.48594	1.75388	4.01791	2.85759	0.000166019	1.51356	1.88799	4.57088	1.69044	0.00463667	1.1695	1.44544	2.39883
404	48.27	52.69	28.22	23.41	17.21	sp|O15027|SC16A_HUMAN	Protein transport protein Sec16A OS=Homo sapiens GN=SEC16A PE=1 SV=3	HUMAN	30			1.00925	0.776269	1.13763	0.887156	1.14815	0.83946	0.173544	1.14815	0.717794	0.963829	0.613762	0.0129287	1.33045	0.413047	0.816582	0.77983	0.263999	1.18032	0.642688	0.92045	0.654636	0.0449056	1.25893	0.49204	0.824138	0.809096	0.165182	1.14815	0.679204	0.928966	0.717794	0.158731	1.24738	0.515229	0.895365
405	48.25	52.64	74.32	67.5	64.32	sp|P62191|PRS4_HUMAN	26S protease regulatory subunit 4 OS=Homo sapiens GN=PSMC1 PE=1 SV=1	HUMAN	41			1.2942	0.165891	1.13763	1.13763	1.61436	0.483059	0.0237058	1.5417	0.436516	0.744732	1.14815	0.974414	1.11686	1.02802	1.31826	1.25893	0.361202	1.1272	1.11686	1.5417	1.27057	0.432262	1.15878	1.09648	1.61436	1	0.717441	1.09648	0.912011	1.10662	0.92045	0.798523	1.11686	0.831764	1.02802
406	48.23	51.53	51.3	36.14	28.56	sp|Q15020|SART3_HUMAN	Squamous cell carcinoma antigen recognized by T-cells 3 OS=Homo sapiens GN=SART3 PE=1 SV=1	HUMAN	30			0.654636	0.905352	1.1695	0.570164	0.765597	0.879023	0.467486	1.09648	0.794328	0.963829	0.887156	0.22378	1.11686	0.744732	0.990832	0.990832	0.318417	1.09648	0.903649	1.08643	0.928966	0.997277	1.09648	0.855067	1.01859	2.10863	1.10138e-06	1.38038	1.52757	2.53513	1.30617	0.00956197	1.14815	1.13763	1.47231
408	48.17	48.27	87.13	81.01	61.81	sp|P48637|GSHB_HUMAN	Glutathione synthetase OS=Homo sapiens GN=GSS PE=1 SV=1	HUMAN	35			0.954993	0.583618	1.08643	0.879023	1.03753	0.691831	0.494531	1.28233	0.608135	0.887156	0.549541	0.152962	1.44544	0.444631	0.794328	1.41906	0.192006	1.18032	1.20226	1.70608	1.40605	0.385781	1.1695	1.20226	1.70608	1.6293	0.0777346	1.24738	1.30617	2.01372	1.23595	0.194252	1.09648	1.1272	1.38038
407	48.17	52.63	46.84	34.88	25.91	sp|Q9HAV4|XPO5_HUMAN	Exportin-5 OS=Homo sapiens GN=XPO5 PE=1 SV=1	HUMAN	34			0.879023	0.592373	1.1272	0.77983	0.990832	0.409261	0.00179566	1.59956	0.244343	0.654636	0.77983	0.283329	1.15878	0.660693	0.903649	0.496592	0.0116287	1.39316	0.369828	0.691831	0.474242	0.000603234	1.44544	0.283139	0.685488	0.731139	0.11589	1.18032	0.591562	0.862979	0.510505	0.00596967	1.36773	0.331131	0.698232
409	48.05	50.25	57.2	46.24	34.13	sp|Q9Y2L1|RRP44_HUMAN	Exosome complex exonuclease RRP44 OS=Homo sapiens GN=DIS3 PE=1 SV=2	HUMAN	29			1.40605	0.471903	1.25893	1.11686	1.6293	0.981748	0.657343	1.13763	0.847227	1.11686	1.15878	0.937536	1.15878	1	1.31826	0.698232	0.127515	1.21339	0.580764	0.847227	0.887156	0.446181	1.13763	0.794328	1.00925	0.831764	0.0621501	1.1272	0.737904	0.937562	0.855067	0.300218	1.13763	0.751623	0.972747
410	48	50.1	57.39	47.38	33.41	sp|Q9GZR7|DDX24_HUMAN	ATP-dependent RNA helicase DDX24 OS=Homo sapiens GN=DDX24 PE=1 SV=1	HUMAN	30			0.946237	0.385532	1.18032	0.824138	1.11686	1.08643	0.923137	1.13763	0.954993	1.36773	1.23595	0.0137193	1.15878	1.0666	1.64437	0.586138	0.0325848	1.36773	0.469894	0.801678	0.679204	0.0706759	1.24738	0.505825	0.847227	0.937562	0.79243	1.11686	0.831764	1.04713	0.903649	0.599067	1.15878	0.794328	1.04713
411	47.99	49.69	64.14	56.08	51.66	sp|Q86YP4|P66A_HUMAN	Transcriptional repressor p66-alpha OS=Homo sapiens GN=GATAD2A PE=1 SV=1	HUMAN	28			0.981748	0.432877	1.1272	0.862979	1.10662	1	0.556041	1.13763	0.879023	1.1272	1.22462	0.289945	1.1695	1.04713	1.55597	0.879023	0.721506	1.15878	0.737904	1.01859	0.698232	0.0808236	1.23595	0.363078	0.862979	1.00925	0.864912	1.13763	0.887156	1.1695	0.879023	0.508664	1.15878	0.737904	1.01859
412	47.97	49.58	47.93	35.35	31.99	sp|Q96P70|IPO9_HUMAN	Importin-9 OS=Homo sapiens GN=IPO9 PE=1 SV=3	HUMAN	29			0.903649	0.88416	1.10662	0.801678	1	0.57544	0.111133	1.21339	0.469894	0.698232	0.787046	0.455246	1.11686	0.685488	0.879023	0.772681	0.555955	1.1272	0.666807	0.870964	0.809096	0.976745	1.11686	0.698232	0.903649	0.809096	0.99427	1.1272	0.698232	0.912011	0.60256	0.280934	1.25893	0.457088	0.758578
413	47.85	48.81	75.36	65.55	59.09	sp|P50454|SERPH_HUMAN	Serpin H1 OS=Homo sapiens GN=SERPINH1 PE=1 SV=2	HUMAN	48			0.625173	0.315129	1.1695	0.570164	0.731139	1.01859	0.978911	1.07647	0.946237	1.13763	1.64437	0.159966	1.23595	1.33045	1.92309	2.24905	0.00369599	1.36773	1.64437	2.80543	2.12814	0.0234705	1.34276	1.58489	2.65461	2.03236	0.0165825	1.34276	1.51356	2.51189	1.61436	0.188855	1.23595	1.30617	1.83654
414	47.81	49.64	82.95	75	67.5	sp|Q15084|PDIA6_HUMAN	Protein disulfide-isomerase A6 OS=Homo sapiens GN=PDIA6 PE=1 SV=1	HUMAN	70			0.648634	0.676434	1.10662	0.597035	0.717794	1.31826	0.387809	1.09648	1.20226	1.52757	2.10863	0.0332671	1.28233	1.64437	2.53513	2.03236	0.0269867	1.23595	1.64437	2.53513	2.58226	0.0176074	1.33045	1.94089	3.28095	2.60615	0.0053086	1.40605	1.85353	3.43558	1.47231	0.151144	1.1695	1.25893	1.67494
415	47.8	47.93	77.69	74.36	73.33	sp|Q12905|ILF2_HUMAN	Interleukin enhancer-binding factor 2 OS=Homo sapiens GN=ILF2 PE=1 SV=2	HUMAN	62			0.772681	0.787077	1.10662	0.654636	0.855067	0.963829	0.76111	1.05682	0.903649	1.01859	1.31826	0.0217848	1.07647	1.22462	1.61436	0.824138	0.816873	1.08643	0.765597	0.895365	0.751623	0.19531	1.0666	0.711214	0.801678	1.41906	0.691523	1.14815	1.23595	1.58489	0.801678	0.804124	1.0666	0.751623	0.855067
416	47.54	48.75	52.16	42.48	31.55	sp|Q8NI36|WDR36_HUMAN	WD repeat-containing protein 36 OS=Homo sapiens GN=WDR36 PE=1 SV=1	HUMAN	33			0.731139	0.12374	1.18032	0.619441	0.862979	0.937562	0.923776	1.11686	0.83946	1.04713	1.0666	0.374225	1.1272	0.946237	1.22462	0.679204	0.205347	1.21339	0.544503	0.824138	0.586138	0.0231511	1.24738	0.452898	0.731139	0.765597	0.197553	1.15878	0.660693	0.887156	0.369828	0.00176026	1.33045	0.255859	0.49204
417	47.5	47.9	62.18	44.74	38.97	sp|P08237|K6PF_HUMAN	6-phosphofructokinase, muscle type OS=Homo sapiens GN=PFKM PE=1 SV=2	HUMAN	40			1.45881	0.208518	1.23595	1.18032	1.8197	0.879023	0.940637	1.18032	0.772681	1.03753	1.00925	0.64845	1.11686	0.903649	1.13763	0.772681	0.0310393	1.23595	0.666807	0.954993	0.660693	0.00361604	1.25893	0.49204	0.831764	0.660693	0.0213141	1.2942	0.549541	0.855067	0.534564	0.050136	1.52757	0.401791	0.816582
418	47.41	49.21	61.45	52.88	43.87	sp|P16435|NCPR_HUMAN	NADPH--cytochrome P450 reductase OS=Homo sapiens GN=POR PE=1 SV=2	HUMAN	36			0.619441	0.283977	1.38038	0.49204	0.855067	1.02802	0.600642	1.11686	0.92045	1.18032	1.00925	0.863077	1.1272	0.895365	1.18032	1.28233	0.40925	1.18032	1.08643	1.52757	1.38038	0.132631	1.19124	1.15878	1.90546	1.47231	0.0645536	1.21339	1.21339	2.1677	1.10662	0.515082	1.11686	0.990832	1.2942
419	47.36	49.74	28.1	16.78	11.44	sp|P11717|MPRI_HUMAN	Cation-independent mannose-6-phosphate receptor OS=Homo sapiens GN=IGF2R PE=1 SV=3	HUMAN	28			0.887156	0.545276	1.14815	0.744732	1.01859	0.772681	0.297976	1.15878	0.660693	0.895365	1	0.721494	1.15878	0.862979	1.14815	1.77011	0.0364151	1.41906	1.24738	2.44343	1.78649	0.00156709	1.34276	1.33045	2.29087	1.35519	0.711312	1.27057	1.0666	1.64437	1.23595	0.540027	1.28233	0.963829	1.57036
420	47.21	49.28	85.25	78.45	71.9	sp|P24752|THIL_HUMAN	Acetyl-CoA acetyltransferase, mitochondrial OS=Homo sapiens GN=ACAT1 PE=1 SV=1	HUMAN	62			0.847227	0.708793	1.1272	0.77983	0.954993	1.47231	0.42077	1.11686	1.31826	1.67494	2.26986	0.0183931	1.28233	1.77011	2.93765	2.05116	0.0461623	1.24738	1.64437	2.51189	2.88403	0.0226692	1.39316	2.07014	3.76704	4.20727	0.000246814	1.51356	2.77971	6.08135	2.35505	0.00168756	1.30617	1.80302	2.99226
421	47.17	49.49	64.09	51.22	44.21	sp|Q06210|GFPT1_HUMAN	Glucosamine--fructose-6-phosphate aminotransferase [isomerizing] 1 OS=Homo sapiens GN=GFPT1 PE=1 SV=3	HUMAN	32			1.05682	0.378109	1.09648	0.963829	1.15878	0.452898	0.0982123	1.36773	0.387258	0.619441	0.524807	0.172903	1.22462	0.457088	0.642688	1.09648	0.140719	1.10662	0.990832	1.21339	1.10662	0.566055	1.11686	0.990832	1.23595	0.972747	0.607179	1.10662	0.887156	1.07647	1.07647	0.140481	1.1272	0.954993	1.20226
422	47.08	49.28	36.93	29.89	26.6	sp|P53992|SC24C_HUMAN	Protein transport protein Sec24C OS=Homo sapiens GN=SEC24C PE=1 SV=3	HUMAN	33			1.07647	0.518278	1.10662	0.972747	1.18032	0.642688	0.0697453	1.22462	0.57544	0.787046	0.724436	0.279928	1.20226	0.586138	0.870964	0.946237	0.81908	1.10662	0.855067	1.04713	0.972747	0.863543	1.10662	0.862979	1.07647	1.14815	0.281373	1.10662	1.03753	1.25893	0.937562	0.786761	1.09648	0.855067	1.02802
423	47.08	49.21	31.08	18.36	11.04	sp|O95071|UBR5_HUMAN	E3 ubiquitin-protein ligase UBR5 OS=Homo sapiens GN=UBR5 PE=1 SV=2	HUMAN	30			1.2942	0.252376	1.30617	0.990832	1.55597	0.831764	0.488317	1.19124	0.679204	0.990832	0.903649	0.743754	1.18032	0.765597	1.0666	0.591562	0.306561	1.39316	0.465586	0.824138	0.744732	0.372256	1.21339	0.625173	0.903649	0.765597	0.277388	1.21339	0.586138	0.928966	0.49204	0.0301132	1.41906	0.366438	0.698232
424	47.04	49.87	57.16	46.8	38.65	sp|Q9UKV8|AGO2_HUMAN	Protein argonaute-2 OS=Homo sapiens GN=EIF2C2 PE=1 SV=3	HUMAN	29			1.04713	0.484544	1.20226	0.870964	1.35519	0.92045	0.778233	1.19124	0.772681	1.09648	0.92045	0.986022	1.19124	0.744732	1.09648	0.685488	0.763337	1.31826	0.554626	0.903649	0.954993	0.690027	1.19124	0.794328	1.13763	0.794328	0.472823	1.25893	0.57544	1	0.711214	0.558965	1.30617	0.524807	0.928966
425	47.02	47.09	35.24	23.05	17.91	sp|Q07157|ZO1_HUMAN	Tight junction protein ZO-1 OS=Homo sapiens GN=TJP1 PE=1 SV=3	HUMAN	29			0.630957	0.0858169	1.39316	0.534564	0.879023	0.625173	0.309094	1.45881	0.496592	0.912011	0.801678	0.735517	1.19124	0.679204	0.954993	0.83946	0.945777	1.18032	0.737904	0.990832	0.972747	0.40909	1.14815	0.855067	1.11686	0.879023	0.642028	1.19124	0.751623	1.04713	0.461318	0.026993	1.55597	0.387258	0.717794
426	47	63.49	56.32	43.83	30.52	sp|Q29RF7|PDS5A_HUMAN	Sister chromatid cohesion protein PDS5 homolog A OS=Homo sapiens GN=PDS5A PE=1 SV=1	HUMAN	39			0.816582	0.231382	1.15878	0.625173	0.946237	1.07647	0.934763	1.14815	0.937562	1.40605	1.61436	0.0355365	1.31826	1.22462	2.14783	0.515229	0.0517534	1.49968	0.409261	0.772681	0.731139	0.588121	1.18032	0.619441	0.862979	1.21339	0.234872	1.15878	1.04713	1.67494	1.0666	0.171171	1.13763	0.937562	1.35519
427	46.98	48.53	59.91	46.77	39.87	sp|Q92973|TNPO1_HUMAN	Transportin-1 OS=Homo sapiens GN=TNPO1 PE=1 SV=2	HUMAN	40			1	0.754406	1.04713	0.954993	1.04713	0.981748	0.730853	1.04713	0.937562	1.02802	1	0.530608	1.04713	0.954993	1.04713	0.981748	0.964673	1.05682	0.928966	1.03753	0.972747	0.130144	1.04713	0.928966	1.01859	0.963829	0.552321	1.04713	0.92045	1.00925	0.954993	0.0809346	1.05682	0.903649	1.00925
428	46.91	48.15	37.58	23.8	16.64	sp|P51532|SMCA4_HUMAN	Transcription activator BRG1 OS=Homo sapiens GN=SMARCA4 PE=1 SV=2	HUMAN	28			0.92045	0.636049	1.15878	0.77983	1.0666	0.887156	0.979027	1.19124	0.731139	1.05682	0.954993	0.967067	1.19124	0.787046	1.13763	0.77983	0.199196	1.21339	0.613762	0.946237	0.765597	0.179234	1.20226	0.608135	0.92045	0.870964	0.324543	1.1695	0.724436	1.01859	0.731139	0.143701	1.21339	0.57544	0.887156
429	46.88	47.93	45.49	30.46	21.28	sp|Q8N3U4|STAG2_HUMAN	Cohesin subunit SA-2 OS=Homo sapiens GN=STAG2 PE=1 SV=3	HUMAN	27			0.862979	0.978974	1.22462	0.654636	1.05682	0.954993	0.650277	1.19124	0.809096	1.13763	1.05682	0.179567	1.19124	0.887156	1.24738	0.685488	0.579111	1.2942	0.515229	0.887156	0.597035	0.152897	1.45881	0.398107	0.870964	0.954993	0.56865	1.19124	0.809096	1.13763	0.636796	0.467328	1.43219	0.474242	0.912011
430	46.73	49.46	46.34	36.5	25.03	sp|Q15424|SAFB1_HUMAN	Scaffold attachment factor B1 OS=Homo sapiens GN=SAFB PE=1 SV=4	HUMAN	25			0.946237	0.844794	1.1272	0.847227	1.0666	1.10662	0.3339	1.11686	0.990832	1.27057	1.58489	0.00400008	1.22462	1.2942	2.44343	1.14815	0.470468	1.13763	1.00925	1.40605	1.03753	0.578702	1.1272	0.92045	1.1695	1.27057	0.0922964	1.15878	1.09648	1.69044	1.31826	0.113518	1.15878	1.13763	1.67494
431	46.72	47.06	40.78	28.77	23.06	sp|Q8IY17|PLPL6_HUMAN	Neuropathy target esterase OS=Homo sapiens GN=PNPLA6 PE=1 SV=2	HUMAN	31			0.794328	0.305362	1.18032	0.685488	0.937562	1.51356	0.0568746	1.2942	1.1695	1.92309	1.36773	0.112119	1.31826	1.03753	1.69044	1.6293	0.052586	1.44544	1.1272	2.22844	1.70608	0.00121041	1.41906	1.20226	2.10863	2.12814	0.00956304	1.59956	1.33045	3.19154	1.28233	0.0434186	1.23595	1.03753	1.51356
432	46.68	47.45	53.12	44.99	38.35	sp|O60568|PLOD3_HUMAN	Procollagen-lysine,2-oxoglutarate 5-dioxygenase 3 OS=Homo sapiens GN=PLOD3 PE=1 SV=1	HUMAN	29			1.03753	0.776913	1.13763	0.912011	1.1695	1.15878	0.435775	1.1272	1.02802	1.2942	1.1695	0.241952	1.1272	1.03753	1.30617	0.717794	0.304901	1.22462	0.534564	0.879023	0.794328	0.745946	1.19124	0.679204	0.946237	0.794328	0.939949	1.19124	0.630957	0.946237	0.787046	0.861038	1.19124	0.654636	0.937562
433	46.63	48.46	49.37	41.14	36.68	sp|Q9H307|PININ_HUMAN	Pinin OS=Homo sapiens GN=PNN PE=1 SV=4	HUMAN	37			0.77983	0.417803	1.14815	0.704693	0.895365	1.44544	0.0418806	1.18032	1.22462	1.72187	1.77011	0.0071673	1.24738	1.41906	2.22844	0.544503	0.0356932	1.33045	0.398107	0.724436	0.772681	0.131955	1.14815	0.672977	0.887156	0.60256	0.379396	1.28233	0.505825	0.772681	0.794328	0.439794	1.1695	0.691831	0.928966
434	46.43	47.14	59.82	51.45	45.45	sp|Q14247|SRC8_HUMAN	Src substrate cortactin OS=Homo sapiens GN=CTTN PE=1 SV=2	HUMAN	28			0.963829	0.845679	1.11686	0.855067	1.07647	0.737904	0.427943	1.25893	0.630957	0.928966	0.954993	0.963788	1.1272	0.855067	1.07647	1.28233	0.0570811	1.1695	1.09648	1.48594	1.48594	0.0427867	1.23595	1.20226	1.77011	1.25893	0.14712	1.18032	1.0666	1.44544	0.963829	0.27431	1.13763	0.855067	1.09648
435	46.41	47.43	40.05	29.09	20.3	sp|Q14C86|GAPD1_HUMAN	GTPase-activating protein and VPS9 domain-containing protein 1 OS=Homo sapiens GN=GAPVD1 PE=1 SV=2	HUMAN	29			1.47231	0.0516597	1.14815	1.28233	1.69044	0.862979	0.873953	1.14815	0.751623	0.990832	1.02802	0.547863	1.14815	0.895365	1.18032	0.744732	0.950992	1.30617	0.60256	0.972747	0.625173	0.260888	1.31826	0.515229	0.824138	1.1695	0.410222	1.13763	1.02802	1.34276	0.765597	0.787808	1.13763	0.672977	0.870964
436	46.38	51.58	58.85	45.67	31.49	sp|Q9Y4W6|AFG32_HUMAN	AFG3-like protein 2 OS=Homo sapiens GN=AFG3L2 PE=1 SV=2	HUMAN	31			0.981748	0.838584	1.1272	0.847227	1.10662	0.847227	0.901093	1.13763	0.744732	0.963829	0.642688	0.188739	1.35519	0.505825	0.870964	1.35519	0.17066	1.15878	1.1695	1.52757	1.7378	0.0239189	1.2942	1.34276	2.03236	0.544503	0.0979091	1.33045	0.394457	0.724436	0.879023	0.624688	1.11686	0.794328	0.981748
437	46.28	47.81	52.31	44.54	34.53	sp|Q9BZF1|OSBL8_HUMAN	Oxysterol-binding protein-related protein 8 OS=Homo sapiens GN=OSBPL8 PE=1 SV=3	HUMAN	32			0.765597	0.445504	1.15878	0.666807	0.887156	0.49204	0.285604	1.34276	0.420727	0.660693	0.855067	0.856515	1.10662	0.772681	0.946237	1.94089	0.0172205	1.27057	1.52757	2.75423	2.63027	0.00325934	1.30617	2.01372	3.76704	2.31206	0.00448315	1.35519	1.70608	3.28095	1.20226	0.0463351	1.1272	1.0666	1.5417
438	46.25	47.1	84.06	78.13	70.94	sp|P08758|ANXA5_HUMAN	Annexin A5 OS=Homo sapiens GN=ANXA5 PE=1 SV=2	HUMAN	54			1.30617	0.219946	1.10662	1.18032	1.49968	0.387258	0.00405113	1.44544	0.293765	0.559758	0.246604	0.000351966	1.49968	0.177011	0.369828	1.77011	0.00307194	1.1695	1.51356	2.31206	2.48886	5.07829e-05	1.25893	1.97697	3.31131	0.724436	0.083113	1.11686	0.660693	0.809096	1.20226	0.0739974	1.10662	1.08643	1.39316
439	46.21	47.14	33.69	22.02	17.05	sp|Q86U86|PB1_HUMAN	Protein polybromo-1 OS=Homo sapiens GN=PBRM1 PE=1 SV=1	HUMAN	26			0.60256	0.183997	1.30617	0.461318	0.787046	1.23595	0.930749	1.43219	0.862979	1.59956	1.13763	0.819166	1.25893	0.903649	1.45881	1.55597	0.327378	1.44544	1.07647	2.14783	1.78649	0.383125	1.48594	1.20226	2.37684	1.48594	0.443369	1.31826	1.1272	2.42103	1.39316	0.336076	1.31826	1.05682	1.75388
440	46.19	48.06	43.44	32.5	24.31	sp|Q01970|PLCB3_HUMAN	1-phosphatidylinositol-4,5-bisphosphate phosphodiesterase beta-3 OS=Homo sapiens GN=PLCB3 PE=1 SV=2	HUMAN	27			0.765597	0.923081	1.21339	0.60256	0.928966	1.21339	0.162864	1.19124	1.01859	1.43219	1.15878	0.351093	1.15878	1	1.34276	0.981748	0.900459	1.14815	0.855067	1.1272	1.24738	0.255167	1.25893	0.990832	1.5417	1.77011	0.0102605	1.36773	1.2942	2.42103	1.58489	0.046224	1.2942	1.22462	2.12814
441	46.12	48.15	65.55	61.08	51.58	sp|O75131|CPNE3_HUMAN	Copine-3 OS=Homo sapiens GN=CPNE3 PE=1 SV=1	HUMAN	48			0.954993	0.476972	1.08643	0.879023	1.03753	0.625173	0.0992146	1.33045	0.515229	0.831764	0.691831	0.0195246	1.23595	0.549541	0.855067	0.630957	0.0763516	1.30617	0.496592	0.824138	1.55597	0.0171375	1.21339	1.28233	1.77011	0.591562	0.00849875	1.34276	0.47863	0.794328	0.608135	0.0354727	1.27057	0.483059	0.772681
442	46.1	48.71	78.05	70.39	60.04	sp|P26196|DDX6_HUMAN	Probable ATP-dependent RNA helicase DDX6 OS=Homo sapiens GN=DDX6 PE=1 SV=2	HUMAN	34			1.10662	0.378958	1.11686	0.990832	1.23595	0.679204	0.359094	1.25893	0.496592	0.855067	0.862979	0.762295	1.1272	0.711214	0.972747	0.685488	0.104868	1.23595	0.483059	0.847227	0.515229	0.0191821	1.40605	0.30479	0.724436	0.685488	0.0364301	1.22462	0.452898	0.83946	0.724436	0.584169	1.20226	0.539511	0.870964
443	46.07	58.71	69.62	69.09	59.41	sp|P09651|ROA1_HUMAN	Heterogeneous nuclear ribonucleoprotein A1 OS=Homo sapiens GN=HNRNPA1 PE=1 SV=5	HUMAN	99			1.02802	0.868881	1.05682	0.972747	1.07647	0.92045	0.523208	1.09648	0.83946	1.00925	1.23595	0.307871	1.05682	1.1695	1.31826	0.744732	0.352803	1.13763	0.648634	0.847227	0.648634	0.330175	1.14815	0.564937	0.744732	0.724436	0.103188	1.13763	0.648634	0.824138	0.20893	0.0184479	1.36773	0.161436	0.285759
444	46.06	47.96	39.67	26.25	21.92	sp|Q9UKV3|ACINU_HUMAN	Apoptotic chromatin condensation inducer in the nucleus OS=Homo sapiens GN=ACIN1 PE=1 SV=2	HUMAN	31			0.870964	0.980739	1.1272	0.672977	0.981748	1.23595	0.513896	1.1695	1.05682	1.41906	1.55597	0.0229747	1.30617	1.19124	2.07014	1.20226	0.832291	1.22462	0.981748	1.43219	1.02802	0.981347	1.14815	0.895365	1.18032	1.11686	0.715642	1.15878	0.963829	1.28233	1.20226	0.299557	1.18032	1.01859	1.40605
445	46.02	46.3	77.62	73.43	70.63	sp|P16104|H2AX_HUMAN	Histone H2A.x OS=Homo sapiens GN=H2AFX PE=1 SV=2	HUMAN	129			0.515229	0.588662	1.10662	0.469894	0.570164	1.7378	0.517026	1.19124	1.45881	2.01372	2.22844	0.260523	1.18032	1.88799	2.70396	1.43219	0.527753	1.13763	1.25893	1.61436	1.92309	0.305488	1.20226	1.59956	2.18776	3.34195	0.184002	1.38038	2.42103	4.32514	3.28095	0.0910167	1.33045	2.46604	4.16869
446	45.97	46.48	70.95	69.26	58.74	sp|Q01518|CAP1_HUMAN	Adenylyl cyclase-associated protein 1 OS=Homo sapiens GN=CAP1 PE=1 SV=5	HUMAN	45			1	0.276316	1.0666	0.937562	1.08643	0.440555	0.13948	1.44544	0.383707	0.636796	0.648634	0.392157	1.27057	0.539511	0.824138	1.59956	0.00454674	1.1695	1.36773	1.88799	1.6293	0.0180016	1.18032	1.38038	2.01372	1.15878	0.342986	1.0666	1.08643	1.2942	1.21339	0.0153249	1.07647	1.1272	1.30617
447	45.96	50.59	62	58.27	45.16	sp|O76094|SRP72_HUMAN	Signal recognition particle 72 kDa protein OS=Homo sapiens GN=SRP72 PE=1 SV=3	HUMAN	34			1.15878	0.31464	1.22462	0.946237	1.40605	0.928966	0.815325	1.15878	0.794328	1.07647	1.08643	0.252885	1.1695	0.928966	1.25893	0.990832	0.992309	1.15878	0.847227	1.14815	0.772681	0.196139	1.21339	0.554626	0.937562	1.09648	0.774419	1.19124	0.92045	1.31826	0.937562	0.740578	1.13763	0.801678	1.0666
448	45.9	46	59.6	56.06	47.31	sp|P61764|STXB1_HUMAN	Syntaxin-binding protein 1 OS=Homo sapiens GN=STXBP1 PE=1 SV=1	HUMAN	31			0.685488	0.661137	1.18032	0.57544	0.809096	1.13763	0.440583	1.20226	0.946237	1.34276	1.36773	0.64726	1.2942	1.05682	1.61436	1.99526	0.00122282	1.44544	1.38038	2.63027	2.12814	0.000888406	1.47231	1.44544	2.93765	2.99226	2.08457e-05	1.64437	1.8197	4.61318	1.87068	0.000511644	1.41906	1.31826	2.55859
449	45.88	49.9	43.49	29.9	20.76	sp|Q8TAQ2|SMRC2_HUMAN	SWI/SNF complex subunit SMARCC2 OS=Homo sapiens GN=SMARCC2 PE=1 SV=1	HUMAN	24			0.870964	0.810552	1.1695	0.758578	1.01859	0.765597	0.406765	1.27057	0.642688	0.972747	1.15878	0.135702	1.13763	1.01859	1.34276	1.02802	0.588459	1.11686	0.92045	1.15878	1.0666	0.898913	1.11686	0.954993	1.22462	1.28233	0.513013	1.21339	1.05682	1.58489	0.972747	0.711698	1.11686	0.862979	1.08643
450	45.84	47.09	59.7	44.49	33.71	sp|Q8TDD1|DDX54_HUMAN	ATP-dependent RNA helicase DDX54 OS=Homo sapiens GN=DDX54 PE=1 SV=2	HUMAN	25			0.711214	0.281103	1.14815	0.625173	0.816582	1.08643	0.513398	1.13763	0.954993	1.22462	1.05682	0.361671	1.1272	0.937562	1.20226	0.554626	0.186677	1.35519	0.436516	0.751623	0.293765	0.000597293	1.59956	0.210863	0.469894	0.801678	0.499505	1.20226	0.591562	0.963829	0.390841	0.00913522	1.55597	0.248886	0.608135
451	45.83	45.9	90.54	88.33	81.07	sp|P63244|GBLP_HUMAN	Guanine nucleotide-binding protein subunit beta-2-like 1 OS=Homo sapiens GN=GNB2L1 PE=1 SV=3	HUMAN	57			1.1695	0.527403	1.08643	1.07647	1.28233	0.654636	0.133747	1.19124	0.586138	0.77983	0.847227	0.29389	1.07647	0.787046	0.912011	0.510505	0.0117333	1.28233	0.440555	0.654636	0.474242	0.0052086	1.34276	0.394457	0.636796	0.47863	0.00660696	1.34276	0.405509	0.642688	0.524807	0.0120149	1.2942	0.444631	0.679204
452	45.68	46.34	63.88	54.29	45.1	sp|O76021|RL1D1_HUMAN	Ribosomal L1 domain-containing protein 1 OS=Homo sapiens GN=RSL1D1 PE=1 SV=3	HUMAN	44			0.946237	0.91799	1.0666	0.895365	1.00925	0.895365	0.41283	1.0666	0.847227	0.954993	1.35519	0.0016993	1.1272	1.20226	1.55597	0.440555	0.000773695	1.30617	0.366438	0.57544	0.452898	0.000858571	1.33045	0.390841	0.60256	0.376704	1.98899e-05	1.38038	0.296483	0.519996	0.349945	9.45093e-05	1.38038	0.288403	0.483059
453	45.67	46.26	75.73	66.52	59.55	sp|P60228|EIF3E_HUMAN	Eukaryotic translation initiation factor 3 subunit E OS=Homo sapiens GN=EIF3E PE=1 SV=1	HUMAN	36			1.03753	0.661086	1.08643	0.954993	1.11686	0.544503	0.00770375	1.18032	0.457088	0.642688	0.57544	0.0758523	1.15878	0.465586	0.666807	0.465586	0.00826999	1.24738	0.398107	0.580764	0.334195	0.00335597	1.28233	0.270396	0.428549	0.356451	0.000962481	1.2942	0.270396	0.461318	0.2208	0.00206493	1.28233	0.178649	0.283139
454	45.59	51.63	44.88	36.26	27.9	sp|Q13751|LAMB3_HUMAN	Laminin subunit beta-3 OS=Homo sapiens GN=LAMB3 PE=1 SV=1	HUMAN	31			0.847227	0.728171	1.19124	0.666807	1.00925	1.25893	0.522396	1.19124	1.05682	1.45881	1.33045	0.1421	1.20226	1.10662	1.55597	1.24738	0.558723	1.21339	1.02802	1.47231	1.21339	0.308959	1.19124	1.01859	1.44544	1.51356	0.251886	1.33045	1.13763	1.95884	0.824138	0.673117	1.22462	0.591562	1.00925
455	45.51	48.26	54.95	45.05	34.9	sp|Q13618|CUL3_HUMAN	Cullin-3 OS=Homo sapiens GN=CUL3 PE=1 SV=2	HUMAN	29			0.92045	0.635313	1.1695	0.77983	1.07647	0.340408	0.0525773	1.58489	0.224905	0.539511	0.580764	0.429033	1.22462	0.47863	0.711214	0.724436	0.420576	1.24738	0.60256	0.903649	0.642688	0.202665	1.21339	0.474242	0.77983	0.751623	0.131439	1.14815	0.642688	0.862979	0.625173	0.368671	1.14815	0.544503	0.717794
456	45.5	49.39	43.76	33.55	27.79	sp|P57678|GEMI4_HUMAN	Gem-associated protein 4 OS=Homo sapiens GN=GEMIN4 PE=1 SV=2	HUMAN	27			0.981748	0.928227	1.19124	0.83946	1.1695	0.92045	0.539928	1.1695	0.787046	1.07647	0.862979	0.296448	1.18032	0.744732	1.01859	0.515229	0.00117242	1.38038	0.346737	0.711214	0.420727	0.000123036	1.52757	0.21677	0.642688	0.636796	0.00542228	1.24738	0.510505	0.794328	0.420727	0.00012186	1.5417	0.260615	0.648634
457	45.47	49.59	50.97	29.62	16.62	sp|P30622|CLIP1_HUMAN	CAP-Gly domain-containing linker protein 1 OS=Homo sapiens GN=CLIP1 PE=1 SV=2	HUMAN	24			0.862979	0.415391	1.19124	0.724436	1.02802	0.534564	0.0539729	1.48594	0.405509	0.794328	0.654636	0.368137	1.30617	0.465586	0.855067	0.801678	0.871141	1.21339	0.672977	0.972747	1.10662	0.474012	1.15878	0.954993	1.2942	0.794328	0.742862	1.21339	0.679204	0.963829	0.724436	0.30751	1.28233	0.549541	0.928966
458	45.35	46.52	56.85	50.61	42.2	sp|Q9NY33|DPP3_HUMAN	Dipeptidyl peptidase 3 OS=Homo sapiens GN=DPP3 PE=1 SV=2	HUMAN	31			0.903649	0.614002	1.13763	0.809096	1.02802	0.544503	0.0537772	1.49968	0.420727	0.816582	0.636796	0.0941657	1.35519	0.49204	0.862979	1.19124	0.204484	1.13763	1.04713	1.34276	0.912011	0.685171	1.1272	0.809096	1.02802	1	0.58022	1.10662	0.903649	1.10662	1.1695	0.158794	1.13763	1.02802	1.33045
459	45.25	46.48	39.41	27.48	22	sp|O95163|ELP1_HUMAN	Elongator complex protein 1 OS=Homo sapiens GN=IKBKAP PE=1 SV=3	HUMAN	25			1.23595	0.959788	1.22462	1.00925	1.65959	0.954993	0.596069	1.15878	0.824138	1.10662	1.05682	0.87326	1.18032	0.895365	1.2942	0.544503	0.00171787	1.41906	0.436516	0.772681	0.564937	0.000796884	1.34276	0.405509	0.758578	0.765597	0.0164443	1.1695	0.660693	0.895365	0.474242	0.000800657	1.52757	0.334195	0.724436
460	45.24	45.79	44.78	36.03	28.14	sp|Q86XP3|DDX42_HUMAN	ATP-dependent RNA helicase DDX42 OS=Homo sapiens GN=DDX42 PE=1 SV=1	HUMAN	29			0.862979	0.938232	1.13763	0.758578	0.981748	0.847227	0.668132	1.14815	0.744732	0.972747	1.28233	0.232711	1.1695	1.09648	1.59956	0.758578	0.275159	1.20226	0.642688	0.912011	0.765597	0.374633	1.20226	0.672977	0.92045	0.731139	0.234839	1.23595	0.636796	0.903649	0.420727	0.0324759	1.64437	0.319154	0.691831
461	45.19	48.82	48.4	35.67	29.74	sp|O15042|SR140_HUMAN	U2 snRNP-associated SURP motif-containing protein OS=Homo sapiens GN=U2SURP PE=1 SV=2	HUMAN	33			0.879023	0.595461	1.14815	0.772681	1.00925	0.895365	0.833696	1.1272	0.77983	1.00925	1.28233	0.310583	1.19124	1.07647	1.57036	0.847227	0.146274	1.15878	0.698232	0.981748	0.981748	0.756077	1.1272	0.879023	1.10662	0.787046	0.0240575	1.1695	0.685488	0.92045	0.544503	0.00380413	1.39316	0.394457	0.758578
462	45.09	45.72	90.35	85.18	77.65	sp|P22234|PUR6_HUMAN	Multifunctional protein ADE2 OS=Homo sapiens GN=PAICS PE=1 SV=3	HUMAN	45			1.02802	0.243599	1.0666	0.963829	1.09648	0.534564	0.00607387	1.27057	0.436516	0.679204	0.744732	0.0385385	1.1272	0.672977	0.83946	0.293765	1.58258e-06	1.59956	0.195884	0.469894	0.310456	3.52116e-06	1.58489	0.210863	0.49204	0.383707	5.84579e-06	1.45881	0.265461	0.559758	0.30479	1.21073e-05	1.39316	0.212814	0.42462
463	44.89	47.57	73.3	59.72	51.52	sp|P36578|RL4_HUMAN	60S ribosomal protein L4 OS=Homo sapiens GN=RPL4 PE=1 SV=5	HUMAN	65			1.13763	0.90895	1.08643	1.04713	1.22462	0.744732	0.0687272	1.08643	0.679204	0.809096	0.847227	0.272115	1.04713	0.809096	0.887156	0.496592	0.00134951	1.21339	0.398107	0.60256	0.337287	4.7138e-05	1.31826	0.270396	0.444631	0.487529	0.000753698	1.21339	0.387258	0.591562	0.376704	0.000220907	1.22462	0.325087	0.461318
464	44.8	45.03	56.86	46.92	34.59	sp|P07384|CAN1_HUMAN	Calpain-1 catalytic subunit OS=Homo sapiens GN=CAPN1 PE=1 SV=1	HUMAN	26			1.03753	0.75656	1.14815	0.903649	1.20226	0.630957	0.0779953	1.34276	0.452898	0.847227	0.387258	0.00628557	1.77011	0.260615	0.685488	1.49968	0.025173	1.27057	1.18032	2.05116	1.07647	0.253376	1.14815	0.937562	1.27057	1.19124	0.301335	1.19124	1	1.45881	1.08643	0.461011	1.15878	0.937562	1.2942
465	44.78	46.2	51.88	41.46	29.65	sp|Q96GQ7|DDX27_HUMAN	Probable ATP-dependent RNA helicase DDX27 OS=Homo sapiens GN=DDX27 PE=1 SV=2	HUMAN	25			0.879023	0.69209	1.1272	0.77983	0.990832	1.21339	0.111021	1.14815	1.05682	1.40605	1.36773	0.0147992	1.15878	1.18032	1.52757	0.855067	0.901248	1.11686	0.77983	0.954993	0.758578	0.797281	1.21339	0.672977	0.92045	1.10662	0.294779	1.13763	0.972747	1.24738	1.11686	0.511269	1.14815	0.972747	1.2942
466	44.76	46.18	42.64	31.83	23.4	sp|Q9Y2A7|NCKP1_HUMAN	Nck-associated protein 1 OS=Homo sapiens GN=NCKAP1 PE=1 SV=1	HUMAN	26			1.0666	0.852386	1.1272	0.946237	1.20226	0.772681	0.518127	1.21339	0.654636	0.937562	0.92045	0.574396	1.14815	0.787046	1.05682	1.27057	0.456656	1.20226	1.05682	1.64437	1.10662	0.598646	1.14815	0.963829	1.25893	1.11686	0.803543	1.13763	0.981748	1.27057	1.05682	0.658138	1.11686	0.946237	1.19124
467	44.73	48.49	45.45	36.43	26.86	sp|O00267|SPT5H_HUMAN	Transcription elongation factor SPT5 OS=Homo sapiens GN=SUPT5H PE=1 SV=1	HUMAN	27			0.963829	0.830075	1.15878	0.737904	1.11686	1.03753	0.575789	1.18032	0.879023	1.20226	1.14815	0.594168	1.1695	0.981748	1.35519	0.972747	0.706474	1.1695	0.765597	1.13763	0.981748	0.951266	1.1695	0.855067	1.14815	1.19124	0.529404	1.20226	0.990832	1.43219	1.00925	0.817143	1.15878	0.870964	1.15878
468	44.69	49.27	48.61	34.11	28.53	sp|Q86V48|LUZP1_HUMAN	Leucine zipper protein 1 OS=Homo sapiens GN=LUZP1 PE=1 SV=2	HUMAN	29			1.09648	0.8849	1.14815	0.954993	1.27057	1.25893	0.592752	1.24738	1.00925	1.51356	1.21339	0.696781	1.20226	1.00925	1.43219	0.847227	0.449427	1.1695	0.711214	0.990832	1.21339	0.431511	1.20226	1.00925	1.43219	0.990832	0.79503	1.14815	0.870964	1.13763	1.19124	0.743834	1.22462	0.972747	1.44544
469	44.67	47.01	69.03	60.53	54.45	sp|P49189|AL9A1_HUMAN	4-trimethylaminobutyraldehyde dehydrogenase OS=Homo sapiens GN=ALDH9A1 PE=1 SV=3	HUMAN	31			0.772681	0.39515	1.21339	0.636796	0.937562	0.654636	0.216046	1.27057	0.524807	0.831764	0.636796	0.158277	1.2942	0.501187	0.824138	0.946237	0.67382	1.1272	0.855067	1.0666	1.1272	0.224683	1.09648	1.02802	1.23595	1.2942	0.0699182	1.1272	1.14815	1.45881	0.928966	0.369505	1.13763	0.824138	1.05682
470	44.64	46.93	35.39	25.33	15.21	sp|Q9UK61|CC063_HUMAN	Uncharacterized protein C3orf63 OS=Homo sapiens GN=C3orf63 PE=1 SV=3	HUMAN	29			1.34276	0.461661	1.20226	1.11686	1.70608	1.24738	0.316249	1.23595	1.00925	1.5417	1.20226	0.299492	1.21339	0.990832	1.43219	1.39316	0.260854	1.22462	1.13763	1.77011	1.24738	0.371761	1.19124	1.04713	1.45881	1.40605	0.210382	1.21339	1.15878	1.65959	0.809096	0.710061	1.1695	0.704693	0.946237
471	44.63	44.83	76.39	69.95	65.83	sp|Q9UHX1|PUF60_HUMAN	Poly(U)-binding-splicing factor PUF60 OS=Homo sapiens GN=PUF60 PE=1 SV=1	HUMAN	37			0.990832	0.280768	1.11686	0.903649	1.10662	1.08643	0.499895	1.10662	0.981748	1.34276	1.2942	0.0381302	1.1695	1.10662	1.6293	0.42462	0.136209	1.45881	0.301995	0.619441	0.534564	0.171241	1.30617	0.390841	0.698232	0.666807	0.358191	1.18032	0.534564	0.787046	0.448745	0.512178	1.40605	0.363078	0.630957
474	44.6	44.63	82.69	76.12	74.63	sp|Q16698|DECR_HUMAN	2,4-dienoyl-CoA reductase, mitochondrial OS=Homo sapiens GN=DECR1 PE=1 SV=1	HUMAN	49			0.534564	0.0880376	1.51356	0.432514	0.809096	1.23595	0.354957	1.09648	1.1272	1.36773	1.11686	0.289442	1.0666	1.04713	1.23595	2.0893	0.000433114	1.34276	1.55597	2.96483	2.1677	0.00149196	1.34276	1.61436	2.99226	2.51189	4.84665e-05	1.43219	1.75388	3.59749	1.48594	0.00301325	1.15878	1.28233	1.83654
473	44.6	45.11	72.6	66.73	61.84	sp|P21281|VATB2_HUMAN	V-type proton ATPase subunit B, brain isoform OS=Homo sapiens GN=ATP6V1B2 PE=1 SV=3	HUMAN	30			0.903649	0.567387	1.13763	0.794328	1.02802	0.751623	0.104852	1.19124	0.586138	0.895365	0.83946	0.925668	1.18032	0.711214	0.990832	1.51356	0.0151474	1.24738	1.21339	1.88799	1.49968	0.00581301	1.20226	1.24738	2.12814	1.65959	0.00213184	1.28233	1.2942	2.24905	1.31826	0.0211265	1.15878	1.13763	1.75388
472	44.6	48.45	50	40.72	31.93	sp|Q99575|POP1_HUMAN	Ribonucleases P/MRP protein subunit POP1 OS=Homo sapiens GN=POP1 PE=1 SV=2	HUMAN	30			0.903649	0.461003	1.13763	0.794328	1.02802	0.824138	0.955845	1.15878	0.737904	0.954993	1.15878	0.264618	1.10662	1.04713	1.31826	0.591562	0.0319336	1.33045	0.47863	0.787046	0.469894	0.0167255	1.44544	0.331131	0.679204	0.510505	0.035498	1.39316	0.349945	0.711214	0.47863	0.0296239	1.49968	0.363078	0.717794
475	44.55	45.41	46.12	37.59	32.08	sp|P05556|ITB1_HUMAN	Integrin beta-1 OS=Homo sapiens GN=ITGB1 PE=1 SV=2	HUMAN	41			0.772681	0.114347	1.1695	0.49204	0.903649	0.847227	0.567318	1.13763	0.717794	0.963829	1.10662	0.744052	1.09648	1.00925	1.20226	1.92309	5.88409e-05	1.34276	1.43219	2.65461	1.92309	2.70445e-05	1.31826	1.45881	2.70396	1.30617	0.127863	1.19124	1.09648	1.55597	0.887156	0.761786	1.10662	0.758578	0.981748
476	44.49	45.64	66.67	54.41	50	sp|P05455|LA_HUMAN	Lupus La protein OS=Homo sapiens GN=SSB PE=1 SV=2	HUMAN	34			1.38038	0.123845	1.13763	1.21339	1.61436	0.794328	0.252586	1.1272	0.711214	0.895365	0.946237	0.472589	1.07647	0.879023	1.01859	0.549541	0.157751	1.25893	0.47863	0.691831	0.398107	0.0062573	1.48594	0.328095	0.591562	0.855067	0.567282	1.09648	0.794328	0.937562	0.691831	0.753228	1.1272	0.648634	0.77983
477	44.45	50.74	79.8	66.75	66.75	sp|P62195|PRS8_HUMAN	26S protease regulatory subunit 8 OS=Homo sapiens GN=PSMC5 PE=1 SV=1	HUMAN	39			1.35519	0.304795	1.21339	1.11686	1.72187	0.570164	0.164309	1.30617	0.515229	0.744732	0.887156	0.747343	1.10662	0.809096	0.981748	1.52757	0.132217	1.27057	1.20226	1.92309	1.02802	0.990207	1.10662	0.928966	1.1272	1.58489	0.298501	1.28233	1.23595	1.94089	1.49968	0.192669	1.25893	1.19124	1.80302
478	44.44	45.22	36.6	22.65	17.09	sp|Q14966|ZN638_HUMAN	Zinc finger protein 638 OS=Homo sapiens GN=ZNF638 PE=1 SV=2	HUMAN	23			0.724436	0.075454	1.27057	0.597035	0.92045	1.31826	0.314786	1.22462	1.07647	1.58489	1.77011	0.00392968	1.36773	1.2942	2.42103	1.31826	0.374825	1.22462	1.07647	1.6293	1.28233	0.155161	1.21339	1.05682	1.6293	1.21339	0.436809	1.18032	1.02802	1.52757	1.24738	0.0624042	1.18032	1.05682	1.44544
479	44.41	49.9	45.95	34.42	25.7	sp|O43795|MYO1B_HUMAN	Myosin-Ib OS=Homo sapiens GN=MYO1B PE=2 SV=3	HUMAN	31			0.981748	0.591862	1.1272	0.879023	1.10662	1.20226	0.648544	1.14815	1.04713	1.48594	1.47231	0.0460511	1.20226	1.22462	1.94089	0.751623	0.527769	1.19124	0.660693	0.895365	0.580764	0.10789	1.19124	0.501187	0.691831	1.04713	0.870095	1.13763	0.92045	1.21339	0.613762	0.141237	1.28233	0.524807	0.787046
480	44.39	48.55	63.44	52.72	47.11	sp|O00541|PESC_HUMAN	Pescadillo homolog OS=Homo sapiens GN=PES1 PE=1 SV=1	HUMAN	32			1.08643	0.56855	1.1272	0.963829	1.21339	0.801678	0.973297	1.1272	0.698232	0.903649	1.07647	0.466408	1.10662	0.972747	1.19124	0.413047	0.0610264	1.45881	0.260615	0.60256	0.380189	0.00583845	1.41906	0.222844	0.539511	0.698232	0.3661	1.14815	0.559758	0.801678	0.322107	0.28716	1.64437	0.190546	0.529663
481	44.28	45.46	65.35	59.86	52.32	sp|Q8N1G4|LRC47_HUMAN	Leucine-rich repeat-containing protein 47 OS=Homo sapiens GN=LRRC47 PE=1 SV=1	HUMAN	36			1.1695	0.526938	1.19124	0.981748	1.44544	0.831764	0.590891	1.18032	0.591562	0.981748	0.887156	0.933023	1.13763	0.765597	1.00925	0.765597	0.526108	1.19124	0.660693	0.912011	0.751623	0.63395	1.1695	0.47863	0.879023	0.972747	0.919322	1.14815	0.83946	1.11686	0.981748	0.418993	1.13763	0.862979	1.11686
482	44.22	46.78	82.46	76.31	69.7	sp|P17980|PRS6A_HUMAN	26S protease regulatory subunit 6A OS=Homo sapiens GN=PSMC3 PE=1 SV=3	HUMAN	41			1.31826	0.00655375	1.11686	1.18032	1.45881	0.954993	0.837162	1.11686	0.809096	1.0666	1.36773	0.0874274	1.1272	1.21339	1.52757	1.30617	0.128236	1.1695	1.11686	1.44544	1.15878	0.27726	1.1695	0.990832	1.2942	2.14783	2.64804e-05	1.34276	1.59956	2.63027	1.1272	0.220026	1.10662	1.01859	1.28233
483	44.22	45.8	88.07	84.6	80.91	sp|P13489|RINI_HUMAN	Ribonuclease inhibitor OS=Homo sapiens GN=RNH1 PE=1 SV=2	HUMAN	39			0.928966	0.146552	1.10662	0.83946	1.02802	0.469894	0.00701302	1.36773	0.380189	0.642688	0.405509	0.0124989	1.52757	0.340408	0.619441	0.887156	0.920087	1.09648	0.801678	0.972747	0.809096	0.716819	1.14815	0.724436	0.928966	0.679204	0.159565	1.25893	0.586138	0.855067	0.772681	0.460907	1.14815	0.660693	0.887156
484	44.19	45.19	37.73	22.85	16.97	sp|P35573|GDE_HUMAN	Glycogen debranching enzyme OS=Homo sapiens GN=AGL PE=1 SV=3	HUMAN	27			0.765597	0.163811	1.21339	0.57544	0.928966	0.772681	0.199799	1.22462	0.580764	0.946237	0.613762	0.0321606	1.30617	0.469894	0.801678	0.660693	0.0204278	1.24738	0.515229	0.824138	0.660693	0.0533198	1.24738	0.554626	0.824138	0.847227	0.922916	1.15878	0.731139	0.981748	0.452898	0.003321	1.57036	0.356451	0.711214
485	44.15	51.49	72.68	65.32	55.11	sp|P09543|CN37_HUMAN	2',3'-cyclic-nucleotide 3'-phosphodiesterase OS=Homo sapiens GN=CNP PE=1 SV=2	HUMAN	31			0.691831	0.454469	1.33045	0.544503	0.92045	1.52757	0.088949	1.2942	1.18032	2.75423	1.40605	0.117065	1.27057	1.10662	2.42103	1.21339	0.261155	1.18032	1.02802	2.05116	1.08643	0.497537	1.14815	0.946237	1.58489	1.87068	0.00128859	1.39316	1.34276	3.87258	1.61436	0.0210163	1.27057	1.27057	2.91072
486	44.14	47.51	56.73	39.3	30.06	sp|Q9HCS7|SYF1_HUMAN	Pre-mRNA-splicing factor SYF1 OS=Homo sapiens GN=XAB2 PE=1 SV=2	HUMAN	24			1.09648	0.588251	1.1695	0.937562	1.36773	1.19124	0.370477	1.1695	1.01859	1.58489	1.33045	0.453236	1.21339	1.09648	1.80302	0.847227	0.219658	1.20226	0.704693	1.01859	1.02802	0.673865	1.15878	0.887156	1.19124	1.30617	0.570299	1.22462	1.0666	1.75388	0.887156	0.434004	1.20226	0.724436	1.0666
487	44.12	46.61	66.13	57.62	43.97	sp|Q9Y262|EIF3L_HUMAN	Eukaryotic translation initiation factor 3 subunit L OS=Homo sapiens GN=EIF3L PE=1 SV=1	HUMAN	29			1.11686	0.278798	1.09648	1.01859	1.21339	0.586138	0.0730777	1.21339	0.519996	0.711214	0.809096	0.222805	1.1272	0.724436	0.912011	0.570164	0.00687087	1.23595	0.436516	0.704693	0.420727	0.00134846	1.30617	0.346737	0.549541	0.539511	0.00734425	1.27057	0.436516	0.685488	0.349945	0.000327837	1.36773	0.277971	0.47863
488	44.05	44.22	59.22	47.5	43.75	sp|Q16822|PCKGM_HUMAN	Phosphoenolpyruvate carboxykinase [GTP], mitochondrial OS=Homo sapiens GN=PCK2 PE=1 SV=3	HUMAN	28			0.436516	0.0261049	1.2942	0.366438	0.564937	1.11686	0.772731	1.10662	1.00925	1.27057	1.03753	0.604724	1.13763	0.912011	1.18032	0.990832	0.730354	1.11686	0.879023	1.10662	1.07647	0.919694	1.13763	0.946237	1.21339	2.1677	0.0150701	1.34276	1.61436	2.72898	1.22462	0.561652	1.1695	1.04713	1.40605
489	44.04	45.12	53.65	36.26	23.98	sp|Q8IXT5|RB12B_HUMAN	RNA-binding protein 12B OS=Homo sapiens GN=RBM12B PE=1 SV=2	HUMAN	22			0.765597	0.331077	1.20226	0.654636	0.92045	1.04713	0.73086	1.1272	0.928966	1.18032	1.38038	0.139448	1.24738	1.10662	1.58489	0.855067	0.763621	1.13763	0.731139	0.972747	0.895365	0.803513	1.1272	0.801678	1.00925	1.48594	0.154092	1.30617	1.13763	1.69044	1.15878	0.381153	1.1272	1.02802	1.30617
490	44.02	45.97	69.76	64.58	54.64	sp|Q9Y230|RUVB2_HUMAN	RuvB-like 2 OS=Homo sapiens GN=RUVBL2 PE=1 SV=3	HUMAN	31			1.09648	0.544348	1.08643	1.00925	1.18032	0.613762	0.225899	1.15878	0.501187	0.711214	0.847227	0.710752	1.07647	0.794328	0.912011	0.444631	0.0275805	1.2942	0.353183	0.57544	0.452898	0.0343089	1.30617	0.359749	0.591562	0.711214	0.273247	1.1272	0.630957	0.801678	0.440555	0.0386752	1.27057	0.353183	0.559758
491	44	44.61	61.23	47.84	38.21	sp|Q12996|CSTF3_HUMAN	Cleavage stimulation factor subunit 3 OS=Homo sapiens GN=CSTF3 PE=1 SV=1	HUMAN	27			0.937562	0.916	1.10662	0.847227	1.03753	1.19124	0.0976034	1.09648	1.08643	1.31826	1.65959	0.126626	1.15878	1.43219	1.92309	0.990832	0.654053	1.11686	0.895365	1.10662	1.15878	0.438778	1.10662	1.04713	1.28233	1.43219	0.0506571	1.11686	1.28233	1.61436	0.625173	0.637999	1.1695	0.554626	0.731139
492	43.75	44.98	77.58	70.63	59.72	sp|Q16401|PSMD5_HUMAN	26S proteasome non-ATPase regulatory subunit 5 OS=Homo sapiens GN=PSMD5 PE=1 SV=3	HUMAN	42			1.04713	0.834699	1.10662	0.946237	1.15878	0.597035	0.0294407	1.21339	0.519996	0.724436	0.704693	0.164285	1.20226	0.591562	0.847227	0.981748	0.330555	1.08643	0.903649	1.0666	1.02802	0.665606	1.08643	0.946237	1.13763	0.895365	0.676165	1.11686	0.809096	1	0.613762	0.363964	1.13763	0.529663	0.698232
493	43.68	45.08	44.43	30.17	24.17	sp|Q8IX12|CCAR1_HUMAN	Cell division cycle and apoptosis regulator protein 1 OS=Homo sapiens GN=CCAR1 PE=1 SV=2	HUMAN	28			1.02802	0.95773	1.10662	0.928966	1.13763	1.02802	0.692829	1.1272	0.912011	1.14815	1.70608	0.0141032	1.38038	1.23595	2.63027	1.27057	0.257969	1.20226	1.05682	1.69044	1.09648	0.331625	1.14815	0.954993	1.51356	1.47231	0.0292648	1.28233	1.14815	1.97697	1.15878	0.222041	1.13763	1.01859	1.43219
494	43.67	44.16	56.47	43.53	35.49	sp|Q9BZE4|NOG1_HUMAN	Nucleolar GTP-binding protein 1 OS=Homo sapiens GN=GTPBP4 PE=1 SV=3	HUMAN	29			1.09648	0.631341	1.09648	1	1.21339	0.990832	0.929685	1.09648	0.895365	1.08643	1.28233	0.114408	1.10662	1.15878	1.58489	0.570164	0.00948941	1.38038	0.37325	0.787046	0.60256	0.0423306	1.31826	0.474242	0.794328	0.559758	0.0415716	1.36773	0.428549	0.765597	0.428549	0.0324505	1.51356	0.30479	0.648634
495	43.65	44.3	50.05	41.32	29.85	sp|Q5JTZ9|SYAM_HUMAN	Alanyl-tRNA synthetase, mitochondrial OS=Homo sapiens GN=AARS2 PE=1 SV=1	HUMAN	27			0.92045	0.782122	1.15878	0.77983	1.0666	0.928966	0.675359	1.1695	0.751623	1.08643	1	0.43701	1.15878	0.862979	1.19124	1.01859	0.530528	1.15878	0.879023	1.1695	1.34276	0.0561237	1.15878	1.15878	1.6293	1.1695	0.162248	1.14815	1.01859	1.34276	1.19124	0.112273	1.14815	1.03753	1.36773
496	43.64	45.15	48.3	30.21	23.11	sp|P52732|KIF11_HUMAN	Kinesin-like protein KIF11 OS=Homo sapiens GN=KIF11 PE=1 SV=2	HUMAN	27			1.14815	0.364995	1.1272	1.01859	1.30617	1.7378	0.00504628	1.33045	1.30617	2.53513	1.44544	0.00151774	1.20226	1.20226	1.85353	0.660693	0.155073	1.33045	0.428549	0.879023	0.390841	0.0123832	1.72187	0.229087	0.672977	2.03236	0.000334946	1.33045	1.52757	3.16228	1.97697	2.40452e-05	1.31826	1.49968	2.67917
497	43.59	44.1	67.09	60.97	55.27	sp|P55084|ECHB_HUMAN	Trifunctional enzyme subunit beta, mitochondrial OS=Homo sapiens GN=HADHB PE=1 SV=3	HUMAN	35			0.772681	0.340905	1.21339	0.619441	0.937562	1.0666	0.902903	1.07647	0.990832	1.14815	1.19124	0.577518	1.09648	1.08643	1.28233	1.57036	0.0102193	1.20226	1.30617	1.85353	1.8197	0.0376018	1.31826	1.38038	2.35505	1.87068	0.0269963	1.35519	1.38038	2.39883	1.64437	0.0298837	1.23595	1.33045	1.90546
498	43.55	46.58	76.51	67.26	58.36	sp|P36871|PGM1_HUMAN	Phosphoglucomutase-1 OS=Homo sapiens GN=PGM1 PE=1 SV=3	HUMAN	30			0.937562	0.996596	1.14815	0.809096	1.07647	0.92045	0.623717	1.1695	0.772681	1.07647	0.83946	0.846898	1.19124	0.691831	1	1.19124	0.138788	1.19124	1	1.47231	1.02802	0.712029	1.15878	0.887156	1.19124	1.13763	0.302324	1.18032	0.963829	1.45881	0.990832	0.440036	1.15878	0.855067	1.14815
499	43.54	44.27	49.39	36.43	32.23	sp|Q15031|SYLM_HUMAN	Probable leucyl-tRNA synthetase, mitochondrial OS=Homo sapiens GN=LARS2 PE=1 SV=2	HUMAN	25			0.685488	0.031066	1.23595	0.580764	0.847227	0.772681	0.352535	1.14815	0.672977	0.887156	0.946237	0.13966	1.13763	0.824138	1.07647	0.870964	0.574527	1.13763	0.772681	0.990832	0.870964	0.432176	1.14815	0.758578	1	1.21339	0.850376	1.13763	1.0666	1.47231	0.672977	0.181536	1.1695	0.580764	0.787046
500	43.51	43.96	76.75	70.7	66.35	sp|P52292|IMA2_HUMAN	Importin subunit alpha-2 OS=Homo sapiens GN=KPNA2 PE=1 SV=1	HUMAN	50			1.0666	0.499439	1.13763	0.937562	1.39316	1.35519	0.0171698	1.14815	1.18032	1.83654	1.75388	0.000507646	1.24738	1.40605	2.63027	0.363078	0.0295573	1.77011	0.226986	0.642688	0.285759	0.0108741	1.97697	0.237684	0.564937	1.01859	0.856	1.10662	0.92045	1.14815	1.02802	0.297673	1.11686	0.92045	1.1695
501	43.45	45.68	59.43	49.43	41.71	sp|P17655|CAN2_HUMAN	Calpain-2 catalytic subunit OS=Homo sapiens GN=CAPN2 PE=1 SV=6	HUMAN	38			0.928966	0.525529	1.09648	0.855067	1.01859	0.436516	0.075931	1.45881	0.319154	0.636796	0.380189	0.00942735	1.39316	0.285759	0.529663	1.72187	9.54315e-06	1.21339	1.41906	2.33346	1.8197	5.91049e-05	1.27057	1.43219	2.33346	1.00925	0.362864	1.09648	0.92045	1.10662	0.60256	0.556829	1.11686	0.549541	0.672977
502	43.28	45.28	71.96	64.49	57.01	sp|Q14254|FLOT2_HUMAN	Flotillin-2 OS=Homo sapiens GN=FLOT2 PE=1 SV=2	HUMAN	30			0.630957	0.095391	1.33045	0.487529	0.83946	0.972747	0.424585	1.1695	0.887156	1.13763	0.990832	0.593673	1.11686	0.903649	1.10662	2.10863	0.00190892	1.41906	1.48594	2.99226	2.05116	0.00123589	1.40605	1.45881	3.0761	2.26986	7.53575e-05	1.45881	1.55597	3.49945	2.24905	6.1162e-05	1.45881	1.5417	3.37287
503	43.2	43.3	57.47	52.23	50.54	sp|Q16643|DREB_HUMAN	Drebrin OS=Homo sapiens GN=DBN1 PE=1 SV=4	HUMAN	30			0.809096	0.706999	1.09648	0.744732	0.887156	0.879023	0.714506	1.10662	0.801678	0.972747	1.30617	0.509709	1.19124	1.09648	1.64437	1.27057	0.621859	1.19124	1.0666	1.55597	1.14815	0.906511	1.13763	1.00925	1.41906	1.20226	0.962777	1.14815	1.04713	1.41906	1.11686	0.908807	1.1272	0.990832	1.31826
504	42.96	54.54	37.37	22.39	12.61	sp|Q13459|MYO9B_HUMAN	Myosin-IXb OS=Homo sapiens GN=MYO9B PE=1 SV=3	HUMAN	28			1.02802	0.633982	1.18032	0.870964	1.20226	0.737904	0.146742	1.2942	0.47863	0.954993	0.816582	0.0783135	1.19124	0.672977	0.972747	1.02802	0.823834	1.18032	0.870964	1.23595	1.13763	0.949891	1.22462	0.928966	1.40605	1.14815	0.944601	1.22462	0.937562	1.52757	1.04713	0.557434	1.20226	0.870964	1.24738
505	42.81	48.24	48.13	37.01	29.31	sp|O60763|USO1_HUMAN	General vesicular transport factor p115 OS=Homo sapiens GN=USO1 PE=1 SV=2	HUMAN	29			0.912011	0.784482	1.13763	0.801678	1.03753	1.00925	0.767378	1.23595	0.816582	1.22462	0.758578	0.536357	1.1695	0.654636	0.887156	1.78649	0.0362212	1.40605	1.27057	2.24905	1.22462	0.364236	1.21339	1.00925	1.40605	1.5417	0.0426279	1.30617	1.18032	1.85353	1.48594	0.136176	1.30617	1.13763	1.75388
506	42.72	43.21	91.13	78.84	68.6	sp|P15880|RS2_HUMAN	40S ribosomal protein S2 OS=Homo sapiens GN=RPS2 PE=1 SV=2	HUMAN	28			1.00925	0.390997	1.04713	0.963829	1.0666	0.648634	0.00289678	1.14815	0.559758	0.744732	0.972747	0.789037	1.05682	0.928966	1.02802	0.398107	5.16262e-05	1.36773	0.30479	0.544503	0.331131	0.000278518	1.47231	0.258226	0.487529	0.328095	7.097e-05	1.47231	0.246604	0.483059	0.293765	0.000654664	1.49968	0.242103	0.440555
507	42.59	48.71	68.38	53.77	45.26	sp|Q9UG63|ABCF2_HUMAN	ATP-binding cassette sub-family F member 2 OS=Homo sapiens GN=ABCF2 PE=1 SV=2	HUMAN	28			1.11686	0.50758	1.09648	1.01859	1.23595	0.737904	0.0800008	1.14815	0.636796	0.847227	0.895365	0.440313	1.10662	0.801678	0.990832	0.501187	0.0136239	1.34276	0.277971	0.672977	0.554626	0.00914932	1.30617	0.376704	0.724436	0.394457	0.000754901	1.48594	0.229087	0.586138	0.331131	0.000221099	1.59956	0.143219	0.529663
508	42.57	42.83	71.08	65.68	62.97	sp|Q9Y617|SERC_HUMAN	Phosphoserine aminotransferase OS=Homo sapiens GN=PSAT1 PE=1 SV=2	HUMAN	33			1.36773	0.0839458	1.18032	1.15878	1.7378	0.809096	0.953023	1.1695	0.685488	0.946237	1.03753	0.508682	1.13763	0.912011	1.22462	0.383707	0.0118946	1.61436	0.260615	0.619441	0.325087	0.00526738	1.72187	0.207014	0.559758	0.691831	0.047538	1.23595	0.496592	0.855067	0.428549	0.286703	1.52757	0.353183	0.654636
509	42.45	45.33	36.83	16.76	10.79	sp|O75165|DJC13_HUMAN	DnaJ homolog subfamily C member 13 OS=Homo sapiens GN=DNAJC13 PE=1 SV=5	HUMAN	25			1.1272	0.8441	1.13763	0.990832	1.28233	0.816582	0.929919	1.15878	0.704693	0.946237	0.862979	0.912961	1.19124	0.691831	1.02802	1.22462	0.110726	1.15878	1.05682	1.43219	1.30617	0.0929762	1.15878	1.1272	1.59956	1.38038	0.111709	1.1695	1.18032	1.59956	1.01859	0.201328	1.15878	0.879023	1.38038
510	42.39	47.15	46.59	35.29	26.65	sp|Q86XL3|ANKL2_HUMAN	Ankyrin repeat and LEM domain-containing protein 2 OS=Homo sapiens GN=ANKLE2 PE=1 SV=4	HUMAN	26			0.758578	0.300551	1.23595	0.613762	0.937562	0.990832	0.98529	1.14815	0.83946	1.13763	1.10662	0.172758	1.15878	0.954993	1.31826	0.981748	0.387459	1.14815	0.83946	1.1272	1.14815	0.117189	1.15878	0.990832	1.35519	0.887156	0.766869	1.18032	0.672977	1.04713	0.794328	0.386183	1.21339	0.630957	0.963829
511	42.36	42.83	75.12	62.56	52.61	sp|O00231|PSD11_HUMAN	26S proteasome non-ATPase regulatory subunit 11 OS=Homo sapiens GN=PSMD11 PE=1 SV=3	HUMAN	30			1.39316	0.192096	1.18032	1.18032	1.64437	0.510505	0.00725717	1.24738	0.444631	0.636796	1.05682	0.885923	1.09648	0.963829	1.1695	1.07647	0.865798	1.11686	0.963829	1.18032	0.903649	0.454857	1.07647	0.83946	0.972747	1.07647	0.334166	1.1272	0.954993	1.19124	0.92045	0.84565	1.07647	0.847227	0.990832
512	42.34	47.99	48.95	34.47	29.23	sp|Q9H6R4|NOL6_HUMAN	Nucleolar protein 6 OS=Homo sapiens GN=NOL6 PE=1 SV=2	HUMAN	35			1.10662	0.493543	1.14815	0.963829	1.24738	0.937562	0.263497	1.13763	0.83946	1.0666	1.25893	0.0768704	1.18032	1.0666	1.44544	0.586138	0.170597	1.35519	0.398107	0.794328	0.77983	0.858198	1.19124	0.636796	0.928966	0.648634	0.435541	1.33045	0.47863	0.862979	0.49204	0.231851	1.47231	0.401791	0.724436
513	42.28	42.67	81.14	77.54	63.47	sp|P40925|MDHC_HUMAN	Malate dehydrogenase, cytoplasmic OS=Homo sapiens GN=MDH1 PE=1 SV=4	HUMAN	36			1.49968	0.28177	1.23595	1.21339	1.67494	0.539511	0.219316	1.41906	0.487529	0.765597	1	0.874412	1.08643	0.92045	1.09648	1.85353	0.101119	1.33045	1.39316	2.12814	1.88799	0.368271	1.33045	1.41906	2.18776	2.31206	0.0123578	1.34276	1.72187	2.83139	1.67494	0.00457628	1.2942	1.2942	2.07014
514	42.25	44.06	43.63	35.53	28.56	sp|Q8WWM7|ATX2L_HUMAN	Ataxin-2-like protein OS=Homo sapiens GN=ATXN2L PE=1 SV=2	HUMAN	26			0.946237	0.966735	1.1272	0.831764	1.0666	0.608135	0.00984642	1.38038	0.363078	0.83946	0.862979	0.779005	1.15878	0.717794	1	0.704693	0.0382527	1.25893	0.47863	0.887156	0.751623	0.0129112	1.21339	0.570164	0.912011	0.691831	0.0275975	1.28233	0.505825	0.887156	0.801678	0.187529	1.21339	0.648634	0.972747
515	42.13	42.64	58.93	55.33	47.77	sp|Q86UE4|LYRIC_HUMAN	Protein LYRIC OS=Homo sapiens GN=MTDH PE=1 SV=2	HUMAN	34			0.717794	0.477763	1.13763	0.660693	0.816582	0.630957	0.158518	1.25893	0.559758	0.794328	1.13763	0.398499	1.09648	1.03753	1.28233	1.7378	0.0175294	1.25893	1.38038	2.03236	2.31206	0.00199662	1.41906	1.6293	3.04789	1.47231	0.196787	1.22462	1.20226	1.78649	1.39316	0.133071	1.15878	1.20226	1.67494
516	41.96	45.51	63.97	59.72	52.23	sp|P54578|UBP14_HUMAN	Ubiquitin carboxyl-terminal hydrolase 14 OS=Homo sapiens GN=USP14 PE=1 SV=3	HUMAN	32			1.03753	0.449306	1.09648	0.946237	1.13763	0.387258	0.0682441	1.22462	0.322107	0.474242	0.672977	0.557122	1.1695	0.539511	0.787046	0.847227	0.701362	1.10662	0.765597	0.937562	1.05682	0.677307	1.11686	0.946237	1.18032	0.724436	0.808357	1.14815	0.625173	0.831764	0.416869	0.78192	1.10662	0.380189	0.461318
517	41.94	42.15	46.15	36.57	34.05	sp|Q96T88|UHRF1_HUMAN	E3 ubiquitin-protein ligase UHRF1 OS=Homo sapiens GN=UHRF1 PE=1 SV=1	HUMAN	29			0.809096	0.490863	1.19124	0.619441	0.963829	0.794328	0.604165	1.19124	0.642688	0.946237	0.801678	0.744671	1.20226	0.672977	0.963829	0.559758	0.125564	1.33045	0.299226	0.744732	0.534564	0.0799049	1.31826	0.299226	0.704693	0.597035	0.0244248	1.27057	0.380189	0.758578	0.192309	0.00082728	1.85353	0.118032	0.356451
519	41.89	44.43	50.22	39.62	34.15	sp|P42566|EPS15_HUMAN	Epidermal growth factor receptor substrate 15 OS=Homo sapiens GN=EPS15 PE=1 SV=2	HUMAN	28			0.772681	0.727591	1.22462	0.510505	0.946237	0.870964	0.838875	1.18032	0.654636	1.02802	0.765597	0.744173	1.24738	0.554626	0.954993	1.1695	0.0331322	1.19124	0.981748	1.39316	1.22462	0.0176604	1.22462	1	1.52757	1.40605	0.000655124	1.2942	1.08643	1.75388	1.15878	0.0195808	1.19124	0.972747	1.39316
518	41.89	45.25	26.16	15.81	11.09	sp|Q8IWZ3|ANKH1_HUMAN	Ankyrin repeat and KH domain-containing protein 1 OS=Homo sapiens GN=ANKHD1 PE=1 SV=1	HUMAN	23			1.11686	0.826758	1.30617	0.855067	1.43219	1.18032	0.91907	1.36773	0.862979	1.51356	0.92045	0.701362	1.2942	0.724436	1.19124	1.24738	0.55519	1.31826	0.946237	1.64437	0.787046	0.388954	1.36773	0.483059	1.07647	1.2942	0.848929	1.33045	0.972747	1.6293	1.57036	0.329997	1.47231	1.0666	2.07014
520	41.85	42.72	53.64	40.62	34.77	sp|Q9Y4R8|TELO2_HUMAN	Telomere length regulation protein TEL2 homolog OS=Homo sapiens GN=TELO2 PE=1 SV=2	HUMAN	32			0.816582	0.571464	1.20226	0.672977	0.981748	0.972747	0.388804	1.20226	0.809096	1.1695	0.608135	0.115208	1.38038	0.428549	0.83946	0.383707	0.00858263	1.59956	0.275423	0.613762	0.452898	0.0130613	1.51356	0.272898	0.685488	0.691831	0.445499	1.25893	0.515229	0.870964	0.369828	0.0581161	1.65959	0.280543	0.613762
521	41.84	41.9	81.12	77.27	75.87	sp|P60174|TPIS_HUMAN	Triosephosphate isomerase OS=Homo sapiens GN=TPI1 PE=1 SV=3	HUMAN	92			1.00925	0.366712	1.00925	1	1.01859	0.954993	0.0384927	1.00925	0.946237	0.963829	0.963829	0.153786	1.00925	0.954993	0.972747	0.990832	0.984109	1.00925	0.981748	1	0.954993	0.1962	1.00925	0.946237	0.963829	0.990832	0.89535	1.00925	0.981748	1	1.01859	0.429842	1.00925	1.00925	1.02802
523	41.79	42.36	68.3	60.86	45.99	sp|P48444|COPD_HUMAN	Coatomer subunit delta OS=Homo sapiens GN=ARCN1 PE=1 SV=1	HUMAN	28			0.895365	0.83942	1.10662	0.794328	0.990832	0.501187	0.0848976	1.41906	0.359749	0.711214	0.704693	0.38723	1.21339	0.559758	0.855067	0.724436	0.515554	1.18032	0.619441	0.855067	0.801678	0.281154	1.15878	0.679204	0.928966	0.691831	0.13343	1.24738	0.559758	0.862979	0.660693	0.509354	1.23595	0.539511	0.816582
522	41.79	43.79	31.57	18.14	12.1	sp|P49750|YLPM1_HUMAN	YLP motif-containing protein 1 OS=Homo sapiens GN=YLPM1 PE=1 SV=3	HUMAN	20			0.672977	0.175478	1.25893	0.524807	0.847227	1	0.443932	1.28233	0.77983	1.24738	1.22462	0.78273	1.2942	0.946237	1.47231	1.0666	0.51297	1.27057	0.83946	1.31826	1.1272	0.61657	1.21339	0.928966	1.34276	1.33045	0.797378	1.31826	1.00925	1.67494	1.20226	0.673474	1.24738	0.963829	1.47231
524	41.77	44.59	53.59	42.33	31.55	sp|Q96T76|MMS19_HUMAN	MMS19 nucleotide excision repair protein homolog OS=Homo sapiens GN=MMS19 PE=1 SV=2	HUMAN	27			1.14815	0.218289	1.14815	1	1.31826	0.794328	0.788231	1.14815	0.691831	0.912011	0.672977	0.300021	1.23595	0.544503	0.831764	0.570164	0.147153	1.33045	0.444631	0.758578	0.679204	0.310194	1.24738	0.544503	0.847227	0.751623	0.253428	1.15878	0.654636	0.870964	0.672977	0.121325	1.20226	0.496592	0.809096
526	41.75	41.8	80.79	67.11	67.11	sp|P22695|QCR2_HUMAN	Cytochrome b-c1 complex subunit 2, mitochondrial OS=Homo sapiens GN=UQCRC2 PE=1 SV=3	HUMAN	36			0.895365	0.67187	1.10662	0.809096	0.990832	0.981748	0.734223	1.1272	0.887156	1.10662	0.666807	0.210452	1.27057	0.539511	0.847227	1.19124	0.398893	1.1272	1.05682	1.45881	1.70608	0.00699142	1.25893	1.35519	2.22844	0.691831	0.180172	1.21339	0.580764	0.83946	0.946237	0.997997	1.11686	0.855067	1.05682
525	41.75	44.6	44.35	31.17	24.03	sp|P28340|DPOD1_HUMAN	DNA polymerase delta catalytic subunit OS=Homo sapiens GN=POLD1 PE=1 SV=2	HUMAN	26			0.816582	0.603977	1.25893	0.642688	1.02802	0.744732	0.853041	1.30617	0.613762	0.972747	0.57544	0.278446	1.47231	0.420727	0.847227	0.328095	0.00890627	1.87068	0.195884	0.613762	0.172187	0.000509595	2.35505	0.1	0.405509	0.409261	0.0439087	1.61436	0.270396	0.660693	0.387258	0.0134479	1.65959	0.229087	0.642688
527	41.67	45.27	68.21	59.86	52.58	sp|Q9HCC0|MCCB_HUMAN	Methylcrotonoyl-CoA carboxylase beta chain, mitochondrial OS=Homo sapiens GN=MCCC2 PE=1 SV=1	HUMAN	32			0.92045	0.831086	1.13763	0.794328	1.04713	1.10662	0.551501	1.14815	0.963829	1.31826	1.10662	0.441641	1.14815	0.963829	1.39316	1.13763	0.651413	1.15878	0.981748	1.39316	1.05682	0.70254	1.14815	0.92045	1.25893	1.38038	0.0666923	1.21339	1.13763	2.07014	0.928966	0.829408	1.1695	0.765597	1.08643
528	41.58	41.77	59.28	47.02	42.59	sp|Q9NTJ5|SAC1_HUMAN	Phosphatidylinositide phosphatase SAC1 OS=Homo sapiens GN=SACM1L PE=1 SV=2	HUMAN	30			0.648634	0.377322	1.20226	0.529663	0.77983	0.946237	0.812316	1.1695	0.831764	1.10662	0.92045	0.964933	1.14815	0.816582	1.05682	1.99526	0.0393059	1.35519	1.47231	2.46604	2.46604	0.0470567	1.47231	1.67494	3.49945	1.59956	0.231435	1.24738	1.28233	1.92309	1.1272	0.796945	1.1272	1	1.2942
529	41.55	42.12	65.85	61.16	58.35	sp|O43175|SERA_HUMAN	D-3-phosphoglycerate dehydrogenase OS=Homo sapiens GN=PHGDH PE=1 SV=4	HUMAN	47			0.954993	0.824433	1.09648	0.879023	1.04713	0.895365	0.691267	1.08643	0.765597	0.972747	0.870964	0.661324	1.09648	0.787046	0.954993	0.636796	0.048097	1.19124	0.544503	0.758578	0.580764	0.188177	1.30617	0.501187	0.758578	0.879023	0.469099	1.09648	0.794328	0.963829	0.731139	0.555671	1.11686	0.608135	0.816582
530	41.49	42.79	50.37	41.15	34.29	sp|Q99459|CDC5L_HUMAN	Cell division cycle 5-like protein OS=Homo sapiens GN=CDC5L PE=1 SV=2	HUMAN	30			0.654636	0.233022	1.25893	0.564937	0.824138	0.895365	0.762275	1.09648	0.816582	0.981748	1.2942	0.105811	1.14815	1.1272	1.65959	0.847227	0.780303	1.15878	0.765597	0.981748	0.824138	0.590263	1.11686	0.751623	0.92045	1.1272	0.480893	1.11686	1.00925	1.34276	0.895365	0.785625	1.1272	0.794328	1.00925
531	41.36	42.51	69.66	56.74	45.69	sp|Q9H4M9|EHD1_HUMAN	EH domain-containing protein 1 OS=Homo sapiens GN=EHD1 PE=1 SV=2	HUMAN	32			0.887156	0.802115	1.14815	0.765597	1.01859	0.879023	0.937517	1.18032	0.772681	1.03753	0.597035	0.239641	1.39316	0.42462	0.831764	1.95884	0.011951	1.28233	1.52757	2.75423	1.72187	0.0121954	1.23595	1.39316	2.37684	1.90546	0.0586628	1.34276	1.41906	2.80543	1.25893	0.261681	1.19124	1.05682	1.67494
532	41.29	43.23	56.81	49.01	43.19	sp|Q12788|TBL3_HUMAN	Transducin beta-like protein 3 OS=Homo sapiens GN=TBL3 PE=1 SV=2	HUMAN	31			0.870964	0.437762	1.13763	0.772681	0.990832	1.0666	0.823031	1.11686	0.954993	1.19124	1.27057	0.254061	1.1272	1.1272	1.41906	0.515229	0.0476997	1.19124	0.448745	0.613762	0.679204	0.0209577	1.1695	0.564937	0.794328	0.879023	0.882304	1.1272	0.77983	0.990832	0.413047	0.00927083	1.31826	0.310456	0.544503
534	41.12	41.57	69.02	63.97	54.55	sp|P46777|RL5_HUMAN	60S ribosomal protein L5 OS=Homo sapiens GN=RPL5 PE=1 SV=3	HUMAN	44			1.15878	0.561222	1.09648	1.05682	1.2942	0.704693	0.0806639	1.15878	0.636796	0.816582	0.794328	0.330616	1.11686	0.737904	0.887156	0.613762	0.0150002	1.21339	0.534564	0.744732	0.413047	0.00105844	1.49968	0.270396	0.619441	0.416869	0.00375301	1.51356	0.30479	0.630957	0.436516	0.00688727	1.43219	0.349945	0.625173
533	41.12	42.31	81.44	77.65	70.45	sp|P61247|RS3A_HUMAN	40S ribosomal protein S3a OS=Homo sapiens GN=RPS3A PE=1 SV=2	HUMAN	38			1.03753	0.385353	1.05682	0.981748	1.09648	0.544503	0.00125533	1.28233	0.469894	0.698232	0.912011	0.659717	1.0666	0.855067	0.972747	0.501187	0.000550614	1.31826	0.42462	0.660693	0.469894	0.000313127	1.36773	0.390841	0.642688	0.448745	0.000280121	1.40605	0.363078	0.630957	0.428549	0.00165334	1.41906	0.346737	0.608135
535	41.07	41.39	53.88	45.88	38.23	sp|Q13724|MOGS_HUMAN	Mannosyl-oligosaccharide glucosidase OS=Homo sapiens GN=MOGS PE=1 SV=5	HUMAN	30			0.83946	0.417308	1.15878	0.704693	0.972747	1.24738	0.113444	1.13763	1.09648	1.41906	1.10662	0.149375	1.14815	0.963829	1.30617	1.11686	0.256422	1.1272	0.990832	1.24738	1.23595	0.0903237	1.15878	1.0666	1.41906	1.47231	0.0252474	1.21339	1.21339	1.70608	0.654636	0.473901	1.1695	0.549541	0.765597
536	41.05	42.47	60.33	48.5	39.67	sp|O94776|MTA2_HUMAN	Metastasis-associated protein MTA2 OS=Homo sapiens GN=MTA2 PE=1 SV=1	HUMAN	28			1.05682	0.758846	1.11686	0.946237	1.19124	1.07647	0.418365	1.11686	0.963829	1.20226	1.31826	0.0309834	1.15878	1.13763	1.52757	0.586138	0.159826	1.43219	0.390841	0.83946	0.787046	0.344157	1.20226	0.642688	0.946237	1.22462	0.290688	1.1695	1.04713	1.39316	1.22462	0.134765	1.13763	1.07647	1.41906
537	40.95	41.29	85.64	85.11	71.01	sp|Q9UNM6|PSD13_HUMAN	26S proteasome non-ATPase regulatory subunit 13 OS=Homo sapiens GN=PSMD13 PE=1 SV=2	HUMAN	35			1.0666	0.305202	1.09648	0.972747	1.1695	0.772681	0.40216	1.15878	0.691831	0.895365	1.14815	0.581569	1.1272	1.01859	1.28233	1.30617	0.413468	1.18032	1.10662	1.45881	1.1272	0.74563	1.1272	1	1.24738	0.981748	0.903862	1.13763	0.903649	1.11686	1.15878	0.345006	1.10662	1.04713	1.36773
538	40.91	43.45	42.86	29.08	22.24	sp|Q9P2R3|ANFY1_HUMAN	Ankyrin repeat and FYVE domain-containing protein 1 OS=Homo sapiens GN=ANKFY1 PE=1 SV=2	HUMAN	23			0.981748	0.578522	1.22462	0.83946	1.20226	0.809096	0.845047	1.22462	0.679204	0.990832	0.937562	0.635336	1.15878	0.801678	1.08643	0.870964	0.851532	1.23595	0.717794	1.07647	0.580764	0.151219	1.40605	0.483059	0.816582	0.751623	0.88514	1.24738	0.619441	0.937562	0.328095	0.0319331	1.75388	0.258226	0.57544
539	40.89	41.2	68.91	64.55	45.35	sp|Q9Y3I0|RTCB_HUMAN	tRNA-splicing ligase RtcB homolog OS=Homo sapiens GN=C22orf28 PE=1 SV=1	HUMAN	28			1.33045	0.229507	1.19124	1.11686	1.7378	0.937562	0.993321	1.11686	0.787046	1.04713	1.08643	0.650464	1.11686	0.972747	1.30617	1.1272	0.321611	1.09648	1.02802	1.23595	1.03753	0.453479	1.09648	0.946237	1.13763	1.21339	0.296439	1.14815	1.05682	1.40605	0.937562	0.298352	1.11686	0.83946	1.04713
540	40.85	44.03	50.15	34.57	27.37	sp|O75150|BRE1B_HUMAN	E3 ubiquitin-protein ligase BRE1B OS=Homo sapiens GN=RNF40 PE=1 SV=4	HUMAN	23			1.02802	0.900085	1.19124	0.862979	1.21339	0.751623	0.356547	1.30617	0.570164	0.981748	1.20226	0.0727755	1.22462	0.981748	1.5417	0.77983	0.131457	1.25893	0.564937	0.981748	0.847227	0.66304	1.23595	0.672977	1.04713	1.03753	0.967596	1.19124	0.870964	1.23595	1.21339	0.0546286	1.21339	1	1.52757
541	40.83	42.42	88.96	81.7	77.92	sp|P05388|RLA0_HUMAN	60S acidic ribosomal protein P0 OS=Homo sapiens GN=RPLP0 PE=1 SV=1	HUMAN	54			1.11686	0.637517	1.04713	1.0666	1.18032	0.49204	0.0135202	1.22462	0.405509	0.60256	0.772681	0.332302	1.09648	0.648634	0.847227	0.636796	0.0793048	1.13763	0.544503	0.724436	0.549541	0.00574567	1.20226	0.444631	0.660693	0.420727	0.00615422	1.33045	0.310456	0.559758	0.280543	0.000768871	1.30617	0.237684	0.366438
542	40.78	41.27	43.59	33.5	24.47	sp|O14974|MYPT1_HUMAN	Protein phosphatase 1 regulatory subunit 12A OS=Homo sapiens GN=PPP1R12A PE=1 SV=1	HUMAN	25			0.903649	0.542501	1.1695	0.751623	1.05682	0.794328	0.387932	1.22462	0.597035	0.972747	1.02802	0.696898	1.15878	0.887156	1.15878	1.11686	0.508416	1.13763	0.981748	1.28233	0.972747	0.921033	1.1272	0.794328	1.09648	0.981748	0.952635	1.13763	0.870964	1.11686	1.13763	0.11178	1.13763	1	1.2942
543	40.71	42.96	31.27	17.19	11.91	sp|Q15154|PCM1_HUMAN	Pericentriolar material 1 protein OS=Homo sapiens GN=PCM1 PE=1 SV=4	HUMAN	23			0.990832	0.94596	1.0666	0.928966	1.05682	0.972747	0.658364	1.0666	0.912011	1.03753	0.972747	0.862294	1.0666	0.912011	1.03753	1	0.564047	1.07647	0.928966	1.07647	0.990832	0.798147	1.07647	0.92045	1.0666	0.981748	0.82871	1.07647	0.912011	1.05682	0.963829	0.773032	1.0666	0.903649	1.02802
544	40.65	41.99	49.03	36.54	24.36	sp|Q96T37|RBM15_HUMAN	Putative RNA-binding protein 15 OS=Homo sapiens GN=RBM15 PE=1 SV=2	HUMAN	23			1.07647	0.969858	1.1695	0.92045	1.31826	1.33045	0.25043	1.19124	1.11686	1.57036	1.27057	0.419361	1.1695	1.08643	1.51356	0.794328	0.792153	1.22462	0.679204	0.972747	1.0666	0.950921	1.15878	0.92045	1.24738	1.25893	0.697983	1.24738	1.00925	1.57036	1.20226	0.578965	1.1695	1.02802	1.41906
545	40.64	41.33	54.28	40.45	27.67	sp|Q13619|CUL4A_HUMAN	Cullin-4A OS=Homo sapiens GN=CUL4A PE=1 SV=3	HUMAN	23			1.08643	0.549249	1.24738	0.870964	1.48594	1.13763	0.301805	1.23595	0.92045	1.48594	0.937562	0.450385	1.21339	0.751623	1.13763	1.08643	0.116999	1.23595	0.879023	1.39316	0.751623	0.688079	1.35519	0.60256	1.01859	1.52757	0.0268935	1.35519	1.1272	2.33346	1.33045	0.0270104	1.28233	1.03753	1.87068
546	40.6	40.75	71.18	61.07	55.53	sp|P07602|SAP_HUMAN	Proactivator polypeptide OS=Homo sapiens GN=PSAP PE=1 SV=2	HUMAN	36			0.60256	0.278655	1.28233	0.529663	0.772681	1.57036	0.575967	1.15878	1.35519	1.8197	2.63027	0.0138935	1.51356	1.7378	3.40408	4.28549	2.80762e-06	1.6293	2.63027	6.85488	6.36796	1.86114e-07	1.88799	3.37287	11.0662	6.66807	2.1766e-07	1.90546	3.49945	11.3763	4.61318	7.97106e-05	1.72187	2.67917	7.17794
547	40.57	43.98	73.45	60.55	54.09	sp|P39023|RL3_HUMAN	60S ribosomal protein L3 OS=Homo sapiens GN=RPL3 PE=1 SV=2	HUMAN	43			1	0.737816	1.0666	0.937562	1.0666	0.711214	0.154312	1.14815	0.625173	0.816582	0.731139	0.364384	1.11686	0.660693	0.816582	0.580764	0.108732	1.21339	0.496592	0.704693	0.366438	0.0043602	1.49968	0.272898	0.549541	0.376704	0.00330505	1.49968	0.275423	0.564937	0.432514	0.0293778	1.38038	0.340408	0.597035
548	40.54	40.99	61.58	48.02	42.75	sp|Q6P1J9|CDC73_HUMAN	Parafibromin OS=Homo sapiens GN=CDC73 PE=1 SV=1	HUMAN	25			0.698232	0.750254	1.21339	0.60256	0.847227	0.855067	0.321879	1.15878	0.744732	0.990832	1.39316	0.0419834	1.23595	1.1272	1.97697	0.847227	0.591853	1.19124	0.737904	1.00925	1.11686	0.0491971	1.14815	0.972747	1.40605	1.55597	0.041169	1.25893	1.23595	2.208	0.946237	0.192442	1.1272	0.83946	1.0666
550	40.48	40.54	68.18	62.92	60.05	sp|P61158|ARP3_HUMAN	Actin-related protein 3 OS=Homo sapiens GN=ACTR3 PE=1 SV=3	HUMAN	32			0.847227	0.946811	1.11686	0.765597	0.946237	1	0.754273	1.10662	0.903649	1.10662	0.724436	0.576232	1.14815	0.660693	0.831764	1.51356	0.0737933	1.25893	1.20226	1.8197	1.36773	0.157454	1.19124	1.14815	1.59956	1.36773	0.345965	1.20226	1.13763	1.59956	0.954993	0.785015	1.1272	0.870964	1.07647
549	40.48	44.07	57.76	50.75	43.24	sp|P61221|ABCE1_HUMAN	ATP-binding cassette sub-family E member 1 OS=Homo sapiens GN=ABCE1 PE=1 SV=1	HUMAN	28			1.23595	0.446083	1.19124	1.03753	1.45881	0.765597	0.0597639	1.14815	0.685488	0.879023	0.972747	0.365387	1.11686	0.870964	1.08643	0.519996	0.000302305	1.34276	0.376704	0.698232	0.448745	0.000346234	1.48594	0.328095	0.666807	0.405509	0.000517745	1.57036	0.255859	0.636796	0.461318	6.90974e-05	1.43219	0.337287	0.660693
551	40.44	44.68	35.5	23.36	14.66	sp|Q9Y4B6|VPRBP_HUMAN	Protein VPRBP OS=Homo sapiens GN=VPRBP PE=1 SV=3	HUMAN	23			1.18032	0.213437	1.15878	1.01859	1.39316	0.648634	0.596088	1.28233	0.428549	0.831764	1.1695	0.245941	1.15878	1.00925	1.36773	0.474242	0.124296	1.55597	0.283139	0.737904	0.717794	0.619813	1.18032	0.608135	0.847227	0.928966	0.897317	1.1695	0.801678	1.08643	0.487529	0.368569	1.39316	0.325087	0.679204
552	40.42	41.71	61.58	46.78	35.53	sp|Q9H0B6|KLC2_HUMAN	Kinesin light chain 2 OS=Homo sapiens GN=KLC2 PE=1 SV=1	HUMAN	23			0.928966	0.687889	1.14815	0.816582	1.0666	0.765597	0.290944	1.22462	0.549541	0.937562	0.794328	0.0854467	1.1695	0.608135	0.928966	0.990832	0.445192	1.18032	0.870964	1.1695	0.801678	0.368313	1.21339	0.679204	0.972747	0.847227	0.240195	1.15878	0.666807	0.981748	1.01859	0.832086	1.13763	0.895365	1.19124
553	40.39	40.42	54.81	49.31	43.99	sp|Q96AY3|FKB10_HUMAN	Peptidyl-prolyl cis-trans isomerase FKBP10 OS=Homo sapiens GN=FKBP10 PE=1 SV=1	HUMAN	24			0.580764	0.134688	1.34276	0.469894	0.77983	1.13763	0.521156	1.13763	1	1.28233	0.895365	0.696251	1.14815	0.77983	1.02802	1.87068	0.145151	1.38038	1.35519	2.85759	1.52757	0.285132	1.22462	1.24738	2.18776	1.90546	0.0524337	1.33045	1.43219	2.63027	1.03753	0.244659	1.11686	0.928966	1.23595
554	40.34	49.63	86.27	81.96	81.96	sp|P62258|1433E_HUMAN	14-3-3 protein epsilon OS=Homo sapiens GN=YWHAE PE=1 SV=1	HUMAN	79			1.19124	0.123853	1.09648	1.08643	1.28233	0.519996	0.0780648	1.11686	0.47863	0.580764	0.847227	0.581157	1.07647	0.794328	0.912011	0.847227	0.602912	1.05682	0.801678	0.895365	0.831764	0.240115	1.0666	0.772681	0.887156	0.591562	0.0692751	1.13763	0.529663	0.672977	0.717794	0.623262	1.10662	0.672977	0.794328
555	40.3	40.56	65.78	59.67	54.58	sp|P22570|ADRO_HUMAN	NADPH:adrenodoxin oxidoreductase, mitochondrial OS=Homo sapiens GN=FDXR PE=1 SV=3	HUMAN	31			0.666807	0.460632	1.31826	0.366438	0.879023	0.92045	0.932645	1.14815	0.758578	1.05682	1.01859	0.179303	1.1272	0.903649	1.15878	0.903649	0.789917	1.1272	0.794328	1.01859	0.912011	0.66173	1.1272	0.765597	1.02802	1.90546	5.63669e-05	1.2942	1.47231	3.28095	1.6293	0.0002881	1.22462	1.33045	2.60615
556	40.27	41.68	67.51	63.31	55.35	sp|Q6NUK1|SCMC1_HUMAN	Calcium-binding mitochondrial carrier protein SCaMC-1 OS=Homo sapiens GN=SLC25A24 PE=1 SV=2	HUMAN	26			0.685488	0.137208	1.24738	0.564937	0.855067	0.60256	0.0193061	1.33045	0.413047	0.801678	0.49204	0.0259582	1.41906	0.334195	0.698232	1.24738	0.123196	1.15878	1.07647	1.55597	1.40605	0.0359173	1.21339	1.15878	1.83654	0.544503	0.0516775	1.40605	0.436516	0.765597	0.787046	0.749033	1.15878	0.672977	0.912011
557	40.23	43.46	48.54	37.31	32.28	sp|Q86Y56|HEAT2_HUMAN	HEAT repeat-containing protein 2 OS=Homo sapiens GN=HEATR2 PE=1 SV=4	HUMAN	26			0.954993	0.899145	1.13763	0.83946	1.08643	0.698232	0.0834542	1.18032	0.57544	0.824138	0.625173	0.0284068	1.22462	0.510505	0.765597	0.636796	0.201252	1.25893	0.524807	0.801678	0.717794	0.046257	1.1695	0.570164	0.83946	0.505825	0.0180721	1.2942	0.37325	0.654636	0.322107	8.65464e-05	1.52757	0.218776	0.49204
558	40.16	41.12	68.27	58.88	50	sp|P63092|GNAS2_HUMAN	Guanine nucleotide-binding protein G(s) subunit alpha isoforms short OS=Homo sapiens GN=GNAS PE=1 SV=1	HUMAN	38			0.831764	0.965915	1.18032	0.724436	0.981748	1.2942	0.698457	1.21339	1.0666	1.48594	1.43219	0.491997	1.25893	1.13763	1.75388	1.23595	0.960592	1.1695	1.05682	1.5417	0.963829	0.946233	1.11686	0.855067	1.07647	1.51356	0.333346	1.25893	1.20226	1.7378	0.630957	0.859403	1.19124	0.524807	0.751623
559	40.13	42.42	47.49	39.51	38.47	sp|O95793|STAU1_HUMAN	Double-stranded RNA-binding protein Staufen homolog 1 OS=Homo sapiens GN=STAU1 PE=1 SV=2	HUMAN	28			1.15878	0.41261	1.19124	0.972747	1.41906	0.824138	0.77823	1.13763	0.731139	0.937562	0.887156	0.771013	1.15878	0.731139	1.02802	0.794328	0.934436	1.15878	0.698232	0.92045	0.539511	0.00966047	1.34276	0.413047	0.724436	0.801678	0.768467	1.13763	0.704693	0.912011	0.758578	0.344979	1.13763	0.666807	0.862979
560	40.08	41.4	45.27	36.41	24.15	sp|P78316|NOP14_HUMAN	Nucleolar protein 14 OS=Homo sapiens GN=NOP14 PE=1 SV=3	HUMAN	19			0.972747	0.868733	1.1272	0.855067	1.09648	0.619441	0.159969	1.33045	0.529663	0.824138	0.990832	0.884988	1.15878	0.862979	1.14815	0.440555	0.0236962	1.51356	0.316228	0.666807	0.564937	0.0871464	1.35519	0.405509	0.765597	0.428549	0.0275564	1.64437	0.288403	0.704693	0.510505	0.0630187	1.35519	0.405509	0.691831
563	39.9	40.07	72.62	60.97	52.23	sp|P11413|G6PD_HUMAN	Glucose-6-phosphate 1-dehydrogenase OS=Homo sapiens GN=G6PD PE=1 SV=4	HUMAN	29			1.27057	0.365226	1.22462	1.03753	1.70608	0.666807	0.292966	1.38038	0.544503	0.92045	0.691831	0.398966	1.27057	0.559758	0.879023	1.48594	0.00529191	1.2942	1.14815	2.10863	1.20226	0.0225504	1.14815	1.04713	1.49968	1.90546	0.000205814	1.38038	1.38038	3.04789	1.90546	9.82613e-05	1.35519	1.40605	2.77971
561	39.9	41.68	37.9	29.18	20.78	sp|Q92620|PRP16_HUMAN	Pre-mRNA-splicing factor ATP-dependent RNA helicase PRP16 OS=Homo sapiens GN=DHX38 PE=1 SV=2	HUMAN	26			0.660693	0.684204	1.20226	0.559758	0.794328	0.597035	0.744992	1.20226	0.510505	0.717794	0.928966	0.508332	1.1695	0.801678	1.08643	0.580764	0.868977	1.18032	0.448745	0.685488	0.608135	0.675775	1.20226	0.49204	0.731139	0.887156	0.478261	1.1695	0.765597	1.03753	0.660693	0.605739	1.1695	0.544503	0.772681
562	39.9	40.99	46.3	32.72	23.94	sp|Q8IX01|SUGP2_HUMAN	SURP and G-patch domain-containing protein 2 OS=Homo sapiens GN=SUGP2 PE=1 SV=2	HUMAN	23			1.22462	0.57946	1.28233	0.954993	1.45881	1.65959	0.189918	1.52757	1.08643	2.10863	2.18776	0.0103755	1.58489	1.38038	2.93765	1.52757	0.171918	1.41906	1.07647	1.95884	1.77011	0.0947051	1.48594	1.19124	2.24905	1.88799	0.0220301	1.49968	1.25893	2.91072	1.99526	0.00143178	1.5417	1.2942	2.88403
564	39.82	41.54	57.69	46.65	37.97	sp|Q5SSJ5|HP1B3_HUMAN	Heterochromatin protein 1-binding protein 3 OS=Homo sapiens GN=HP1BP3 PE=1 SV=1	HUMAN	26			0.772681	0.0333605	1.14815	0.679204	0.887156	1.20226	0.953481	1.10662	1.08643	1.52757	1.58489	0.315722	1.23595	1.28233	2.208	1.69044	0.00436357	1.24738	1.35519	2.39883	1.95884	0.000938127	1.2942	1.51356	3.04789	2.46604	1.17794e-05	1.44544	1.70608	3.80189	1.72187	0.0818543	1.24738	1.38038	2.37684
565	39.78	41.57	61.6	53.45	39.81	sp|P08240|SRPR_HUMAN	Signal recognition particle receptor subunit alpha OS=Homo sapiens GN=SRPR PE=1 SV=2	HUMAN	27			0.816582	0.229942	1.15878	0.691831	0.946237	0.787046	0.713639	1.18032	0.648634	0.928966	1.05682	0.640504	1.11686	0.946237	1.19124	0.698232	0.112419	1.22462	0.505825	0.855067	0.608135	0.1261	1.27057	0.432514	0.772681	0.666807	0.15975	1.23595	0.496592	0.824138	0.380189	0.0372553	1.64437	0.255859	0.625173
566	39.68	41.58	74.51	74.51	72.16	sp|P09661|RU2A_HUMAN	U2 small nuclear ribonucleoprotein A' OS=Homo sapiens GN=SNRPA1 PE=1 SV=2	HUMAN	34			1.08643	0.71088	1.09648	0.990832	1.20226	1.08643	0.427153	1.09648	0.990832	1.20226	1.6293	0.0163785	1.18032	1.38038	1.90546	0.801678	0.644883	1.1695	0.711214	0.937562	0.809096	0.783379	1.13763	0.724436	0.92045	1.15878	0.507967	1.08643	1.0666	1.27057	0.554626	0.812326	1.1272	0.505825	0.625173
567	39.6	39.63	62.48	59.62	45.71	sp|Q10713|MPPA_HUMAN	Mitochondrial-processing peptidase subunit alpha OS=Homo sapiens GN=PMPCA PE=1 SV=2	HUMAN	24			1.08643	0.862961	1.09648	0.990832	1.18032	1.7378	0.0970818	1.28233	1.35519	2.03236	2.24905	0.0450635	1.43219	1.57036	2.77971	1.40605	0.385393	1.13763	1.23595	1.59956	1.11686	0.875922	1.09648	1.01859	1.22462	2.46604	0.0318849	1.35519	1.8197	2.96483	1.80302	0.187961	1.23595	1.45881	2.05116
568	39.49	41.23	56.8	44.4	35.2	sp|P42224|STAT1_HUMAN	Signal transducer and activator of transcription 1-alpha/beta OS=Homo sapiens GN=STAT1 PE=1 SV=2	HUMAN	27			0.801678	0.761982	1.23595	0.586138	0.990832	1.04713	0.234731	1.1695	0.895365	1.21339	0.519996	0.151224	1.48594	0.316228	0.772681	1.44544	0.124227	1.21339	1.19124	1.99526	0.912011	0.0918365	1.22462	0.77983	1.11686	1.10662	0.351951	1.15878	0.954993	1.2942	0.990832	0.283062	1.19124	0.847227	1.18032
569	39.43	40.51	74.9	63.6	48.12	sp|Q9NUU7|DD19A_HUMAN	ATP-dependent RNA helicase DDX19A OS=Homo sapiens GN=DDX19A PE=1 SV=1	HUMAN	24			1.64437	0.764258	1.44544	1.13763	3.28095	0.758578	0.641879	1.47231	0.349945	1.11686	0.954993	0.788741	1.48594	0.619441	1.41906	0.990832	0.998938	1.45881	0.666807	1.44544	0.816582	0.739244	1.44544	0.505825	1.18032	1.1272	0.937806	1.44544	0.77983	1.80302	1.08643	0.944503	1.40605	0.772681	1.7378
570	39.42	40.77	48.45	37.81	34.86	sp|P23588|IF4B_HUMAN	Eukaryotic translation initiation factor 4B OS=Homo sapiens GN=EIF4B PE=1 SV=2	HUMAN	25			1.00925	0.474206	1.09648	0.92045	1.1272	0.642688	0.033911	1.21339	0.554626	0.77983	0.751623	0.0869099	1.11686	0.679204	0.83946	0.60256	0.0170159	1.22462	0.487529	0.737904	0.369828	0.000431765	1.58489	0.288403	0.586138	0.363078	9.19715e-05	1.57036	0.255859	0.570164	0.505825	0.000635938	1.27057	0.42462	0.642688
571	39.41	41.01	30.84	19.63	11.68	sp|Q96N67|DOCK7_HUMAN	Dedicator of cytokinesis protein 7 OS=Homo sapiens GN=DOCK7 PE=1 SV=4	HUMAN	24			1.18032	0.417184	1.18032	1	1.47231	0.801678	0.521865	1.1695	0.691831	0.937562	0.751623	0.564177	1.1695	0.654636	0.879023	0.981748	0.68987	1.1695	0.847227	1.14815	0.831764	0.31625	1.15878	0.717794	0.963829	0.972747	0.969801	1.18032	0.83946	1.14815	0.505825	0.16343	1.31826	0.420727	0.666807
572	39.4	42.5	37.23	28.5	23.54	sp|Q27J81|INF2_HUMAN	Inverted formin-2 OS=Homo sapiens GN=INF2 PE=1 SV=2	HUMAN	26			1.01859	0.797122	1.1695	0.870964	1.18032	1.39316	0.033879	1.20226	1.15878	1.69044	0.862979	0.269106	1.18032	0.737904	1.01859	1.01859	0.603492	1.22462	0.831764	1.20226	1.0666	0.768039	1.18032	0.903649	1.24738	1.41906	0.938491	1.24738	1.13763	1.65959	0.704693	0.62988	1.2942	0.559758	0.912011
573	39.38	40.26	48.28	40.11	29.55	sp|Q12797|ASPH_HUMAN	Aspartyl/asparaginyl beta-hydroxylase OS=Homo sapiens GN=ASPH PE=1 SV=3	HUMAN	34			0.654636	0.0526543	1.21339	0.559758	0.794328	0.937562	0.62858	1.19124	0.816582	1.11686	0.912011	0.799806	1.19124	0.787046	1.08643	1.6293	0.0622638	1.31826	1.23595	2.48886	1.30617	0.118355	1.21339	1.07647	1.7378	1.1272	0.815143	1.19124	0.946237	1.39316	0.452898	0.16698	1.52757	0.356451	0.691831
574	39.35	40.25	67.74	60.08	59.68	sp|P18124|RL7_HUMAN	60S ribosomal protein L7 OS=Homo sapiens GN=RPL7 PE=1 SV=1	HUMAN	38			1	0.787665	1.0666	0.937562	1.07647	0.717794	0.0099252	1.1695	0.613762	0.83946	0.847227	0.397406	1.09648	0.765597	0.928966	0.711214	0.069356	1.15878	0.613762	0.824138	0.42462	0.000936509	1.44544	0.310456	0.613762	0.409261	0.000719423	1.49968	0.280543	0.613762	0.405509	0.000596076	1.52757	0.301995	0.619441
575	39.31	40.59	59.06	49.06	41.51	sp|O75475|PSIP1_HUMAN	PC4 and SFRS1-interacting protein OS=Homo sapiens GN=PSIP1 PE=1 SV=1	HUMAN	25			0.809096	0.988936	1.1695	0.691831	0.946237	1	0.307486	1.11686	0.895365	1.11686	2.33346	3.57967e-05	1.44544	1.61436	2.96483	1.08643	0.400135	1.11686	0.972747	1.20226	1.52757	0.10715	1.24738	1.22462	1.83654	1.70608	0.0051317	1.2942	1.31826	2.10863	1.40605	0.0301279	1.19124	1.18032	1.72187
576	39.22	65.32	63.15	48.62	35.31	sp|O95782|AP2A1_HUMAN	AP-2 complex subunit alpha-1 OS=Homo sapiens GN=AP2A1 PE=1 SV=3	HUMAN	39			0.824138	0.948283	1.14815	0.731139	0.946237	1.05682	0.900925	1.18032	0.895365	1.21339	1	0.559666	1.13763	0.879023	1.15878	1.34276	0.055368	1.21339	1.10662	1.65959	1.28233	0.298469	1.27057	1.00925	1.55597	1.7378	0.00089478	1.35519	1.28233	2.12814	1	0.73592	1.14815	0.870964	1.14815
579	39.18	39.73	96.17	95.79	91.57	sp|Q99714|HCD2_HUMAN	3-hydroxyacyl-CoA dehydrogenase type-2 OS=Homo sapiens GN=HSD17B10 PE=1 SV=3	HUMAN	51			0.744732	0.405859	1.10662	0.642688	0.824138	1.09648	0.145	1.0666	1.02802	1.18032	1.11686	0.250459	1.0666	1.04713	1.19124	0.895365	0.933716	1.0666	0.801678	0.954993	0.879023	0.237055	1.0666	0.758578	0.937562	1.34276	0.0231104	1.08643	1.23595	1.48594	0.765597	0.392951	1.07647	0.717794	0.824138
577	39.18	40.07	52.47	46.09	35.89	sp|Q9UHB9|SRP68_HUMAN	Signal recognition particle 68 kDa protein OS=Homo sapiens GN=SRP68 PE=1 SV=2	HUMAN	28			1.41906	0.605065	1.30617	1.08643	1.69044	1.1695	0.999705	1.23595	0.946237	1.49968	1.1272	0.542873	1.1695	0.963829	1.2942	1.18032	0.814978	1.20226	0.981748	1.35519	0.972747	0.543788	1.14815	0.855067	1.11686	1.20226	0.33385	1.20226	1	1.43219	0.772681	0.752869	1.19124	0.666807	0.92045
578	39.18	39.77	47.7	35.13	28.04	sp|Q08379|GOGA2_HUMAN	Golgin subfamily A member 2 OS=Homo sapiens GN=GOLGA2 PE=1 SV=3	HUMAN	23			0.809096	0.482475	1.19124	0.636796	0.963829	1.31826	0.0272701	1.20226	1.09648	1.52757	1.55597	0.0210202	1.33045	1.1695	1.95884	1.39316	0.0556155	1.24738	1.11686	1.58489	1.6293	0.0153963	1.30617	1.24738	1.95884	1.80302	0.0143299	1.41906	1.27057	2.33346	1.02802	0.737881	1.13763	0.903649	1.15878
580	39.14	42.49	87.12	75.41	64.17	sp|O75955|FLOT1_HUMAN	Flotillin-1 OS=Homo sapiens GN=FLOT1 PE=1 SV=3	HUMAN	31			0.83946	0.642651	1.22462	0.717794	1.02802	0.990832	0.690509	1.13763	0.862979	1.1272	1.08643	0.797233	1.15878	0.937562	1.31826	1.90546	0.00176502	1.28233	1.48594	2.48886	2.10863	0.0128525	1.45881	1.44544	3.0761	3.0761	0.000219795	1.57036	1.95884	4.74242	2.10863	0.000794632	1.44544	1.45881	3.10456
581	39.03	45.63	42.12	28.14	19.56	sp|Q86VI3|IQGA3_HUMAN	Ras GTPase-activating-like protein IQGAP3 OS=Homo sapiens GN=IQGAP3 PE=1 SV=2	HUMAN	32			0.737904	0.374841	1.30617	0.57544	0.963829	0.870964	0.464623	1.21339	0.666807	1.05682	0.847227	0.35153	1.22462	0.691831	1.03753	0.666807	0.133193	1.39316	0.409261	0.928966	0.691831	0.0198767	1.31826	0.483059	0.912011	1	0.869488	1.19124	0.83946	1.19124	0.744732	0.0538806	1.2942	0.580764	0.963829
582	39.02	41.18	47.66	34.35	27.57	sp|Q9BUJ2|HNRL1_HUMAN	Heterogeneous nuclear ribonucleoprotein U-like protein 1 OS=Homo sapiens GN=HNRNPUL1 PE=1 SV=2	HUMAN	28			0.724436	0.435012	1.24738	0.597035	0.903649	1.39316	0.302883	1.15878	1.20226	1.57036	2.22844	0.0695889	1.51356	1.47231	3.25087	1.77011	0.166947	1.43219	1.23595	2.53513	1.6293	0.277829	1.27057	1.28233	2.33346	1.95884	0.147099	1.47231	1.33045	2.65461	1.51356	0.161931	1.21339	1.24738	1.99526
583	38.98	42.21	60.8	47.99	39.81	sp|Q15397|K0020_HUMAN	Pumilio domain-containing protein KIAA0020 OS=Homo sapiens GN=KIAA0020 PE=1 SV=3	HUMAN	29			0.816582	0.921711	1.13763	0.724436	0.928966	0.554626	0.122628	1.2942	0.465586	0.717794	1.22462	0.121804	1.14815	1.0666	1.41906	0.436516	0.0263769	1.36773	0.356451	0.597035	0.534564	0.012891	1.25893	0.405509	0.672977	0.549541	0.0741678	1.27057	0.440555	0.698232	0.328095	0.00545646	1.52757	0.263027	0.501187
584	38.93	39.17	67.4	60.55	59.18	sp|P04439|1A03_HUMAN	HLA class I histocompatibility antigen, A-3 alpha chain OS=Homo sapiens GN=HLA-A PE=1 SV=2	HUMAN	29			0.544503	0.249352	1.47231	0.363078	0.801678	1.59956	0.113454	1.31826	1.21339	2.42103	1.33045	0.425539	1.22462	1.08643	1.83654	1.5417	0.173195	1.2942	1.19124	2.46604	1.75388	0.13266	1.38038	1.27057	2.85759	2.12814	0.0103887	1.45881	1.45881	3.49945	2.44343	0.00761414	1.52757	1.59956	4.32514
585	38.83	41.33	50.58	38.8	29.65	sp|Q6P1N0|C2D1A_HUMAN	Coiled-coil and C2 domain-containing protein 1A OS=Homo sapiens GN=CC2D1A PE=1 SV=1	HUMAN	21			1.03753	0.328127	1.19124	0.870964	1.24738	0.711214	0.712604	1.24738	0.597035	0.887156	0.711214	0.25178	1.22462	0.591562	0.870964	1.01859	0.687012	1.1695	0.870964	1.22462	0.862979	0.681194	1.18032	0.737904	1.01859	1.03753	0.708107	1.18032	0.879023	1.22462	0.855067	0.446421	1.1695	0.731139	1
586	38.82	39.04	43.01	31.66	27.48	sp|Q9UBB9|TFP11_HUMAN	Tuftelin-interacting protein 11 OS=Homo sapiens GN=TFIP11 PE=1 SV=1	HUMAN	22			1.14815	0.291214	1.14815	1	1.38038	1.11686	0.681358	1.14815	0.972747	1.2942	1.49968	0.0149072	1.27057	1.18032	1.99526	0.77983	0.457363	1.27057	0.660693	0.990832	0.847227	0.27342	1.23595	0.717794	1.04713	1.2942	0.068448	1.20226	1.07647	1.6293	1.30617	0.00251323	1.19124	1.09648	1.64437
587	38.67	38.98	51.1	39.04	28.92	sp|Q9BVJ6|UT14A_HUMAN	U3 small nucleolar RNA-associated protein 14 homolog A OS=Homo sapiens GN=UTP14A PE=1 SV=1	HUMAN	19			1.09648	0.591963	1.15878	0.946237	1.30617	1.03753	0.510814	1.14815	0.903649	1.18032	1.67494	0.006	1.31826	1.27057	2.07014	0.862979	0.0964054	1.14815	0.744732	0.990832	0.870964	0.164096	1.1695	0.711214	1.01859	0.630957	0.164645	1.28233	0.469894	0.809096	0.47863	0.0483391	1.45881	0.366438	0.698232
589	38.66	38.76	68.28	63.91	50.34	sp|P18031|PTN1_HUMAN	Tyrosine-protein phosphatase non-receptor type 1 OS=Homo sapiens GN=PTPN1 PE=1 SV=1	HUMAN	25			0.801678	0.533367	1.15878	0.539511	0.928966	1.08643	0.384849	1.09648	0.990832	1.19124	1.14815	0.156444	1.10662	1.03753	1.31826	1.61436	0.00135231	1.23595	1.30617	2.12814	1.69044	0.000678812	1.25893	1.34276	2.44343	1.43219	0.00314444	1.19124	1.20226	1.87068	1.51356	0.0132831	1.21339	1.24738	1.95884
588	38.66	39.61	41.93	29.41	22.35	sp|Q7Z5K2|WAPL_HUMAN	Wings apart-like protein homolog OS=Homo sapiens GN=WAPAL PE=1 SV=1	HUMAN	20			1.25893	0.976375	1.24738	1.00925	1.52757	1.24738	0.990249	1.22462	1.01859	1.47231	1.36773	0.0562704	1.25893	1.08643	1.61436	0.912011	0.559111	1.15878	0.787046	1.05682	1.27057	0.874099	1.30617	0.972747	1.5417	1.24738	0.778087	1.22462	1.01859	1.49968	1.14815	0.183367	1.18032	0.972747	1.38038
590	38.65	43.17	73.73	67.37	56.36	sp|P41091|IF2G_HUMAN	Eukaryotic translation initiation factor 2 subunit 3 OS=Homo sapiens GN=EIF2S3 PE=1 SV=3	HUMAN	27			1.1695	0.19266	1.09648	1.0666	1.30617	0.737904	0.0912421	1.19124	0.57544	0.879023	1.04713	0.911391	1.08643	0.963829	1.14815	0.711214	0.117923	1.20226	0.57544	0.855067	0.608135	0.0111667	1.27057	0.469894	0.772681	0.613762	0.0343664	1.28233	0.432514	0.787046	0.698232	0.0364661	1.20226	0.544503	0.83946
591	38.6	38.82	68.63	58.09	52.7	sp|Q8NC51|PAIRB_HUMAN	Plasminogen activator inhibitor 1 RNA-binding protein OS=Homo sapiens GN=SERBP1 PE=1 SV=2	HUMAN	27			1.1695	0.299767	1.10662	1.05682	1.2942	0.625173	0.0748083	1.30617	0.529663	0.816582	0.963829	0.94289	1.08643	0.887156	1.04713	0.398107	0.0132976	1.59956	0.291072	0.636796	0.251189	0.000938132	2.0893	0.15417	0.524807	0.383707	0.00750071	1.58489	0.260615	0.608135	0.534564	0.0204398	1.33045	0.42462	0.711214
592	38.59	38.86	65.73	53.31	42.89	sp|P15170|ERF3A_HUMAN	Eukaryotic peptide chain release factor GTP-binding subunit ERF3A OS=Homo sapiens GN=GSPT1 PE=1 SV=1	HUMAN	29			1.18032	0.668676	1.21339	0.972747	1.51356	0.529663	0.17748	1.57036	0.275423	0.831764	0.751623	0.345993	1.23595	0.510505	0.928966	0.660693	0.229693	1.34276	0.413047	0.887156	0.765597	0.320272	1.24738	0.591562	0.954993	0.642688	0.161703	1.31826	0.363078	0.847227	0.847227	0.686536	1.24738	0.679204	1.05682
593	38.55	44.02	40.94	23.78	15.62	sp|Q9NRL2|BAZ1A_HUMAN	Bromodomain adjacent to zinc finger domain protein 1A OS=Homo sapiens GN=BAZ1A PE=1 SV=2	HUMAN	26			1.1272	0.708516	1.15878	0.972747	1.30617	0.887156	0.478196	1.15878	0.772681	1.02802	1.15878	0.435303	1.15878	1	1.33045	0.591562	0.0674425	1.34276	0.440555	0.794328	0.887156	0.586185	1.14815	0.772681	1.01859	0.564937	0.0185495	1.33045	0.390841	0.751623	0.524807	0.0551842	1.43219	0.398107	0.751623
594	38.53	40.03	66.84	64.52	60.15	sp|P31350|RIR2_HUMAN	Ribonucleoside-diphosphate reductase subunit M2 OS=Homo sapiens GN=RRM2 PE=1 SV=1	HUMAN	31			0.831764	0.129294	1.1272	0.737904	0.937562	1.88799	0.000772908	1.33045	1.41906	2.96483	2.39883	0.000533743	1.40605	1.70608	3.63078	0.711214	0.380449	1.15878	0.469894	0.824138	0.316228	0.0128554	1.78649	0.170608	0.564937	1.59956	0.011504	1.24738	1.28233	2.22844	1.64437	0.00154607	1.27057	1.2942	2.0893
595	38.51	40.05	53.17	39.58	32.59	sp|Q14684|RRP1B_HUMAN	Ribosomal RNA processing protein 1 homolog B OS=Homo sapiens GN=RRP1B PE=1 SV=3	HUMAN	22			0.928966	0.821333	1.10662	0.831764	1.02802	1.05682	0.920816	1.11686	0.946237	1.19124	1.2942	0.0151101	1.1695	1.10662	1.51356	0.717794	0.0645633	1.20226	0.559758	0.862979	0.625173	0.00536273	1.33045	0.483059	0.831764	0.691831	0.0226968	1.24738	0.515229	0.862979	0.549541	0.0217002	1.52757	0.457088	0.83946
596	38.44	39.6	71.05	58.55	53.95	sp|Q9Y265|RUVB1_HUMAN	RuvB-like 1 OS=Homo sapiens GN=RUVBL1 PE=1 SV=1	HUMAN	39			1.04713	0.239986	1.0666	0.981748	1.11686	0.549541	0.203895	1.21339	0.469894	0.666807	0.972747	0.331177	1.07647	0.903649	1.04713	0.515229	0.0390918	1.23595	0.428549	0.636796	0.428549	0.122999	1.40605	0.356451	0.60256	0.483059	0.0386693	1.23595	0.398107	0.597035	0.340408	0.127945	1.35519	0.275423	0.461318
597	38.44	38.71	77.12	68.89	58.61	sp|Q15008|PSMD6_HUMAN	26S proteasome non-ATPase regulatory subunit 6 OS=Homo sapiens GN=PSMD6 PE=1 SV=1	HUMAN	30			1.41906	0.0374462	1.13763	1.24738	1.72187	0.679204	0.881877	1.13763	0.57544	0.772681	0.972747	0.341321	1.10662	0.879023	1.07647	1.05682	0.0674547	1.08643	0.972747	1.23595	1.0666	0.197822	1.07647	0.990832	1.15878	1.21339	0.151861	1.09648	1.10662	1.33045	0.946237	0.0339115	1.10662	0.862979	1.04713
598	38.4	39.27	62.77	60.14	47.26	sp|Q7L1Q6|BZW1_HUMAN	Basic leucine zipper and W2 domain-containing protein 1 OS=Homo sapiens GN=BZW1 PE=1 SV=1	HUMAN	23			1.05682	0.925105	1.10662	0.954993	1.18032	0.887156	0.613694	1.14815	0.765597	1.01859	0.685488	0.115642	1.25893	0.510505	0.862979	0.737904	0.242818	1.21339	0.586138	0.895365	0.831764	0.159359	1.13763	0.731139	0.946237	0.630957	0.0405311	1.31826	0.440555	0.831764	0.469894	0.0433845	1.51356	0.328095	0.711214
599	38.39	38.48	62.24	57.69	53.85	sp|Q15942|ZYX_HUMAN	Zyxin OS=Homo sapiens GN=ZYX PE=1 SV=1	HUMAN	54			1.1272	0.872203	1.11686	1.00925	1.25893	0.474242	0.117588	1.44544	0.398107	0.685488	0.691831	0.184856	1.18032	0.619441	0.816582	1.69044	0.0890957	1.23595	1.36773	2.208	1.38038	0.997843	1.21339	1.13763	1.67494	0.586138	0.0776836	1.33045	0.47863	0.77983	0.559758	0.148587	1.2942	0.47863	0.724436
600	38.2	38.33	58.05	52.74	43.66	sp|P13645|K1C10_HUMAN	Keratin, type I cytoskeletal 10 OS=Homo sapiens GN=KRT10 PE=1 SV=6	HUMAN	33			0.765597	0.904153	1.27057	0.619441	0.972747	0.580764	0.159304	1.44544	0.405509	0.83946	0.47863	0.0677217	1.49968	0.340408	0.717794	1.77011	0.0140128	1.23595	1.43219	2.48886	1.47231	0.31461	1.15878	1.27057	1.75388	1.6293	0.0507187	1.21339	1.34276	2.05116	0.591562	0.878883	1.34276	0.496592	0.794328
602	37.99	38.84	38.5	33.19	27.61	sp|Q8IZL8|PELP1_HUMAN	Proline-, glutamic acid- and leucine-rich protein 1 OS=Homo sapiens GN=PELP1 PE=1 SV=2	HUMAN	24			1.00925	0.930143	1.23595	0.816582	1.20226	1.02802	0.662757	1.1695	0.879023	1.21339	0.972747	0.591832	1.13763	0.801678	1.10662	0.847227	0.17324	1.13763	0.698232	0.963829	0.937562	0.46764	1.13763	0.794328	1.0666	1.2942	0.49743	1.1272	1.14815	1.44544	0.660693	0.47209	1.38038	0.49204	0.912011
601	37.99	41.15	41.48	25.69	18.7	sp|Q96ST3|SIN3A_HUMAN	Paired amphipathic helix protein Sin3a OS=Homo sapiens GN=SIN3A PE=1 SV=2	HUMAN	23			1.52757	0.0396678	1.33045	1.14815	2.03236	0.816582	0.444426	1.24738	0.60256	1.01859	1.30617	0.135035	1.19124	1.09648	1.51356	1.10662	0.20887	1.15878	0.954993	1.2942	1.20226	0.62651	1.19124	1.00925	1.41906	1.34276	0.0940296	1.22462	1.09648	1.77011	1.13763	0.121208	1.14815	0.990832	1.33045
603	37.95	38.95	56.83	41.88	31.57	sp|Q13616|CUL1_HUMAN	Cullin-1 OS=Homo sapiens GN=CUL1 PE=1 SV=2	HUMAN	24			0.981748	0.58801	1.13763	0.855067	1.11686	0.534564	0.00677075	1.49968	0.37325	0.801678	0.794328	0.299602	1.21339	0.636796	0.963829	0.660693	0.166629	1.35519	0.496592	0.895365	0.60256	0.025756	1.36773	0.474242	0.824138	0.648634	0.0197533	1.31826	0.452898	0.855067	0.524807	0.0148481	1.45881	0.359749	0.765597
604	37.92	38.09	64.19	51.92	42.71	sp|P38159|HNRPG_HUMAN	Heterogeneous nuclear ribonucleoprotein G OS=Homo sapiens GN=RBMX PE=1 SV=3	HUMAN	30			0.972747	0.782041	1.10662	0.895365	1.07647	1.41906	0.210435	1.1272	1.25893	1.87068	1.59956	0.108202	1.15878	1.38038	2.0893	1.39316	0.235656	1.13763	1.22462	1.80302	1.08643	0.833955	1.11686	0.972747	1.25893	1.13763	0.688595	1.10662	1.02802	1.25893	0.765597	0.347985	1.18032	0.691831	0.903649
605	37.9	39.99	79.25	73.47	67.01	sp|P06748|NPM_HUMAN	Nucleophosmin OS=Homo sapiens GN=NPM1 PE=1 SV=2	HUMAN	95			1	0.214046	1.00925	0.990832	1.00925	1.00925	0.41983	1.00925	1	1.01859	1.07647	0.000240826	1.00925	1.0666	1.08643	0.963829	0.144634	1.00925	0.954993	0.972747	0.981748	0.942174	1.00925	0.972747	0.990832	0.954993	0.256025	1.00925	0.946237	0.963829	0.972747	0.930561	1.00925	0.963829	0.981748
606	37.81	38.14	67.16	63.08	52.5	sp|P49419|AL7A1_HUMAN	Alpha-aminoadipic semialdehyde dehydrogenase OS=Homo sapiens GN=ALDH7A1 PE=1 SV=5	HUMAN	32			0.946237	0.61315	1.1272	0.847227	1.0666	1.31826	0.120182	1.1695	1.1272	1.44544	1.31826	0.0441165	1.23595	1.0666	1.5417	1.51356	0.0429868	1.33045	1.13763	1.8197	1.13763	0.0832395	1.15878	0.981748	1.30617	2.91072	9.85019e-06	1.64437	1.77011	4.32514	2.05116	2.78589e-05	1.47231	1.39316	2.60615
607	37.8	38.04	42.22	32.21	27.53	sp|Q15269|PWP2_HUMAN	Periodic tryptophan protein 2 homolog OS=Homo sapiens GN=PWP2 PE=1 SV=2	HUMAN	25			1.02802	0.0183499	1.1695	0.879023	1.1695	0.751623	0.45205	1.20226	0.613762	0.903649	1.05682	0.488592	1.13763	0.928966	1.19124	0.570164	0.000962142	1.35519	0.444631	0.772681	0.731139	0.0215185	1.18032	0.564937	0.862979	0.990832	0.544088	1.13763	0.831764	1.1272	0.625173	0.00974938	1.35519	0.474242	0.847227
608	37.78	39.71	70.11	60.66	55.82	sp|Q9H0S4|DDX47_HUMAN	Probable ATP-dependent RNA helicase DDX47 OS=Homo sapiens GN=DDX47 PE=1 SV=1	HUMAN	29			0.801678	0.470832	1.13763	0.691831	0.912011	0.751623	0.410432	1.1695	0.685488	0.879023	0.912011	0.686709	1.09648	0.816582	1	0.49204	0.102655	1.36773	0.409261	0.672977	0.49204	0.0437245	1.41906	0.380189	0.698232	0.660693	0.350723	1.20226	0.564937	0.794328	0.237684	0.00400561	1.80302	0.17378	0.428549
609	37.77	37.61	76.56	56.7	54.55	sp|Q6YN16|HSDL2_HUMAN	Hydroxysteroid dehydrogenase-like protein 2 OS=Homo sapiens GN=HSDL2 PE=1 SV=1	HUMAN	22			0.981748	0.912012	1.1272	0.824138	1.10662	1.52757	0.796616	1.2942	1.18032	1.8197	1.57036	0.27995	1.24738	1.25893	1.80302	1.1272	0.674884	1.19124	0.946237	1.2942	1.44544	0.442968	1.18032	1.22462	1.64437	2.18776	0.14644	1.38038	1.58489	2.75423	1.5417	0.681291	1.23595	1.24738	1.87068
610	37.74	39	74.37	63.16	63.16	sp|P62495|ERF1_HUMAN	Eukaryotic peptide chain release factor subunit 1 OS=Homo sapiens GN=ETF1 PE=1 SV=3	HUMAN	31			1.21339	0.0822932	1.13763	1.0666	1.39316	0.691831	0.187807	1.24738	0.580764	0.862979	0.855067	0.583886	1.10662	0.765597	0.946237	0.691831	0.102009	1.23595	0.564937	0.855067	0.630957	0.176528	1.27057	0.510505	0.801678	0.564937	0.0428971	1.23595	0.474242	0.698232	0.343558	0.0145479	1.64437	0.263027	0.564937
611	37.72	40.09	62.41	45.62	40.12	sp|Q9BW19|KIFC1_HUMAN	Kinesin-like protein KIFC1 OS=Homo sapiens GN=KIFC1 PE=1 SV=2	HUMAN	24			0.704693	0.339718	1.31826	0.529663	0.928966	1.49968	0.0334629	1.24738	1.20226	2.03236	1.31826	0.0488921	1.20226	1.09648	1.64437	0.534564	0.0337949	1.43219	0.319154	0.765597	0.672977	0.0640998	1.30617	0.405509	0.879023	1.36773	0.255669	1.22462	1.11686	1.72187	1.36773	0.104339	1.21339	1.1272	1.70608
612	37.6	41.11	88.31	72.18	64.92	sp|P67936|TPM4_HUMAN	Tropomyosin alpha-4 chain OS=Homo sapiens GN=TPM4 PE=1 SV=3	HUMAN	37			1.24738	0.633732	1.1272	1.10662	1.35519	0.505825	0.0966379	1.28233	0.448745	0.648634	0.751623	0.106279	1.11686	0.642688	0.83946	2.22844	0.00485434	1.25893	1.77011	2.63027	2.70396	0.00217287	1.35519	1.99526	3.37287	1.34276	0.75105	1.14815	1.1695	1.47231	1.61436	0.0923312	1.18032	1.36773	1.83654
613	37.56	37.92	47.23	35.3	27.83	sp|Q8IWA0|WDR75_HUMAN	WD repeat-containing protein 75 OS=Homo sapiens GN=WDR75 PE=1 SV=1	HUMAN	21			1.03753	0.625029	1.13763	0.912011	1.18032	0.981748	0.605208	1.13763	0.855067	1.11686	1.14815	0.626998	1.13763	1.00925	1.33045	0.554626	0.0392548	1.39316	0.340408	0.772681	0.524807	0.0260336	1.41906	0.369828	0.744732	0.549541	0.0277947	1.33045	0.401791	0.731139	0.203236	0.000353665	2.05116	0.11695	0.416869
614	37.51	40.93	46.31	34.68	23.25	sp|Q9BPX3|CND3_HUMAN	Condensin complex subunit 3 OS=Homo sapiens GN=NCAPG PE=1 SV=1	HUMAN	25			1.03753	0.929091	1.19124	0.870964	1.23595	0.711214	0.124172	1.22462	0.554626	0.870964	0.855067	0.998658	1.19124	0.685488	1.01859	0.436516	0.0111767	1.59956	0.246604	0.698232	0.554626	0.0181231	1.34276	0.356451	0.744732	0.630957	0.103413	1.2942	0.420727	0.816582	0.570164	0.108392	1.39316	0.376704	0.794328
616	37.5	38.68	59.19	46.79	40.51	sp|O94925|GLSK_HUMAN	Glutaminase kidney isoform, mitochondrial OS=Homo sapiens GN=GLS PE=1 SV=1	HUMAN	26			1	0.47518	1.14815	0.870964	1.15878	1.11686	0.651555	1.14815	0.972747	1.33045	1.2942	0.0121859	1.20226	1.07647	1.59956	0.49204	0.169208	1.48594	0.325087	0.731139	0.787046	0.941591	1.19124	0.654636	0.937562	0.772681	0.979488	1.21339	0.636796	0.937562	0.580764	0.527492	1.40605	0.452898	0.816582
615	37.5	39.23	60.11	42.44	29.59	sp|Q9ULW0|TPX2_HUMAN	Targeting protein for Xklp2 OS=Homo sapiens GN=TPX2 PE=1 SV=2	HUMAN	22			1.35519	0.939556	1.33045	1.01859	1.70608	4.16869	5.03019e-07	1.88799	2.208	8.70964	6.60693	1.74929e-10	2.12814	3.10456	13.3045	0.737904	0.410286	1.20226	0.496592	0.887156	0.758578	0.488098	1.21339	0.630957	0.92045	3.66438	4.61773e-05	1.90546	1.92309	6.85488	3.7325	0.00124906	1.85353	2.01372	6.66807
617	37.49	37.71	39.1	32.66	28.98	sp|Q14157|UBP2L_HUMAN	Ubiquitin-associated protein 2-like OS=Homo sapiens GN=UBAP2L PE=1 SV=2	HUMAN	28			1.21339	0.803252	1.19124	1.01859	1.45881	0.654636	0.0217506	1.2942	0.510505	0.847227	0.879023	0.0789983	1.14815	0.758578	1.00925	0.660693	0.0144995	1.25893	0.436516	0.831764	0.544503	0.0181272	1.38038	0.440555	0.751623	0.42462	0.00367481	1.5417	0.239883	0.654636	0.648634	0.0366535	1.24738	0.432514	0.809096
618	37.41	41.91	45.06	35.43	29.38	sp|Q8IWT6|LRC8A_HUMAN	Leucine-rich repeat-containing protein 8A OS=Homo sapiens GN=LRRC8A PE=1 SV=1	HUMAN	25			0.855067	0.669855	1.22462	0.724436	1.04713	1.41906	0.178269	1.31826	1.07647	2.07014	1.7378	0.241208	1.49968	1.15878	2.63027	1.38038	0.188442	1.30617	1.05682	1.95884	2.07014	0.00688794	1.47231	1.40605	3.34195	1.90546	0.0382135	1.34276	1.41906	2.85759	1.2942	0.147663	1.21339	1.0666	1.80302
619	37.36	42.63	51.52	38.7	25.65	sp|P21399|ACOC_HUMAN	Cytoplasmic aconitate hydratase OS=Homo sapiens GN=ACO1 PE=1 SV=3	HUMAN	27			0.937562	0.777074	1.1272	0.83946	1.05682	0.758578	0.749018	1.15878	0.666807	0.879023	1.04713	0.344008	1.1272	0.928966	1.1695	1.38038	0.0135593	1.23595	1.11686	1.77011	0.912011	0.82483	1.15878	0.816582	1.05682	1.31826	0.0379837	1.19124	1.10662	1.69044	1	0.651345	1.1272	0.887156	1.13763
620	37.35	37.5	86.71	71.9	67.37	sp|Q9Y266|NUDC_HUMAN	Nuclear migration protein nudC OS=Homo sapiens GN=NUDC PE=1 SV=1	HUMAN	31			1.15878	0.188511	1.09648	1.05682	1.24738	0.758578	0.0301797	1.1272	0.654636	0.855067	0.77983	0.22549	1.10662	0.704693	0.862979	0.586138	0.0138335	1.22462	0.496592	0.717794	0.642688	0.00390085	1.1695	0.559758	0.751623	0.448745	0.000268752	1.41906	0.322107	0.636796	0.559758	0.00296123	1.24738	0.444631	0.698232
621	37.28	37.56	85.75	81.64	74.79	sp|Q15366|PCBP2_HUMAN	Poly(rC)-binding protein 2 OS=Homo sapiens GN=PCBP2 PE=1 SV=1	HUMAN	47			1.1272	0.937759	1.10662	1.01859	1.24738	0.591562	0.402665	1.21339	0.534564	0.717794	0.608135	0.115325	1.21339	0.515229	0.737904	0.613762	0.0886158	1.15878	0.539511	0.711214	0.457088	0.0178528	1.31826	0.376704	0.60256	0.47863	0.0503494	1.21339	0.394457	0.580764	0.457088	0.0557034	1.20226	0.401791	0.549541
622	37.23	38.09	43.59	28.56	17.35	sp|Q9NQW6|ANLN_HUMAN	Actin-binding protein anillin OS=Homo sapiens GN=ANLN PE=1 SV=2	HUMAN	19			0.92045	0.940531	1.23595	0.765597	1.13763	1.83654	0.000765987	1.31826	1.39316	3.63078	1.99526	0.000483482	1.36773	1.45881	3.7325	0.337287	0.0109767	1.92309	0.165959	0.648634	0.349945	0.0821805	1.94089	0.148594	0.679204	2.05116	0.00129216	1.39316	1.47231	4.01791	2.60615	5.57222e-06	1.47231	1.77011	5.39511
623	37.19	40	46.01	31.7	25.94	sp|O60231|DHX16_HUMAN	Putative pre-mRNA-splicing factor ATP-dependent RNA helicase DHX16 OS=Homo sapiens GN=DHX16 PE=1 SV=2	HUMAN	21			0.895365	0.687791	1.14815	0.744732	1.02802	0.981748	0.662535	1.14815	0.847227	1.1272	1.43219	0.284458	1.28233	1.11686	1.83654	0.83946	0.795469	1.20226	0.698232	1.00925	1.10662	0.560657	1.18032	0.937562	1.43219	1.00925	0.839752	1.1695	0.862979	1.19124	0.895365	0.714897	1.1695	0.772681	1.04713
624	37.19	37.71	33.93	24.91	17.49	sp|Q96T23|RSF1_HUMAN	Remodeling and spacing factor 1 OS=Homo sapiens GN=RSF1 PE=1 SV=2	HUMAN	19			0.92045	0.970724	1.21339	0.685488	1.11686	1.20226	0.710731	1.23595	0.972747	1.48594	1.5417	0.0717098	1.39316	1.10662	2.44343	1.55597	0.045754	1.40605	1.10662	2.48886	1.47231	0.151604	1.36773	1.07647	1.92309	1.58489	0.082223	1.44544	1.09648	2.208	1.35519	0.275973	1.35519	1	1.85353
626	37.08	37.38	63.62	55.25	46.11	sp|O60832|DKC1_HUMAN	H/ACA ribonucleoprotein complex subunit 4 OS=Homo sapiens GN=DKC1 PE=1 SV=3	HUMAN	32			0.954993	0.91225	1.09648	0.879023	1.04713	0.92045	0.799569	1.09648	0.83946	1.00925	1.58489	0.0894759	1.24738	1.27057	1.85353	0.666807	0.209398	1.18032	0.564937	0.787046	0.60256	0.198647	1.27057	0.524807	0.765597	0.744732	0.662073	1.13763	0.666807	0.847227	0.619441	0.525388	1.19124	0.544503	0.737904
625	37.08	40.09	44.61	30.69	22.46	sp|Q16513|PKN2_HUMAN	Serine/threonine-protein kinase N2 OS=Homo sapiens GN=PKN2 PE=1 SV=1	HUMAN	21			0.887156	0.694172	1.1695	0.758578	1.03753	0.963829	0.591632	1.21339	0.824138	1.1695	0.787046	0.605462	1.27057	0.60256	1	0.794328	0.357077	1.20226	0.666807	0.954993	0.529663	0.064932	1.5417	0.383707	0.816582	0.895365	0.945202	1.18032	0.751623	1.05682	0.870964	0.965319	1.19124	0.737904	1.03753
627	37.07	38.28	76.35	63.5	57.07	sp|P62333|PRS10_HUMAN	26S protease regulatory subunit 10B OS=Homo sapiens GN=PSMC6 PE=1 SV=1	HUMAN	29			0.954993	0.847375	1.08643	0.887156	1.03753	0.519996	0.138947	1.2942	0.452898	0.672977	0.691831	0.202799	1.1272	0.625173	0.77983	0.847227	0.838162	1.09648	0.77983	0.928966	0.698232	0.151239	1.14815	0.586138	0.801678	1.18032	0.149096	1.10662	1.0666	1.34276	0.946237	0.643776	1.08643	0.870964	1.02802
628	37.06	37.36	56.75	50.36	40.33	sp|O43776|SYNC_HUMAN	Asparaginyl-tRNA synthetase, cytoplasmic OS=Homo sapiens GN=NARS PE=1 SV=1	HUMAN	21			0.954993	0.526682	1.09648	0.870964	1.04713	0.83946	0.494561	1.10662	0.758578	0.928966	0.724436	0.173602	1.15878	0.580764	0.83946	0.831764	0.304274	1.1272	0.679204	0.937562	0.751623	0.117533	1.1272	0.619441	0.847227	0.801678	0.28211	1.1272	0.679204	0.903649	0.608135	0.140031	1.23595	0.510505	0.751623
629	37.05	37.22	63.81	56.16	49.81	sp|O60684|IMA7_HUMAN	Importin subunit alpha-7 OS=Homo sapiens GN=KPNA6 PE=1 SV=1	HUMAN	30			0.765597	0.784573	1.22462	0.636796	0.937562	0.608135	0.527924	1.40605	0.483059	0.855067	0.758578	0.914777	1.20226	0.597035	0.912011	0.870964	0.492806	1.18032	0.724436	1.02802	0.744732	0.912775	1.21339	0.625173	0.903649	0.691831	0.938091	1.31826	0.501187	0.912011	0.809096	0.910669	1.20226	0.60256	0.972747
630	36.88	37.55	36.33	20.04	15.44	sp|Q96RT1|LAP2_HUMAN	Protein LAP2 OS=Homo sapiens GN=ERBB2IP PE=1 SV=2	HUMAN	19			0.887156	0.831734	1.18032	0.751623	1.04713	1.11686	0.0261401	1.1695	0.954993	1.44544	1.11686	0.117645	1.14815	0.972747	1.36773	1.64437	0.0127757	1.30617	1.25893	2.26986	1.61436	0.00210237	1.24738	1.2942	2.35505	1.43219	0.253913	1.24738	1.14815	1.97697	0.608135	0.768309	1.36773	0.440555	0.831764
631	36.85	37.06	77.19	67.3	60.08	sp|P62701|RS4X_HUMAN	40S ribosomal protein S4, X isoform OS=Homo sapiens GN=RPS4X PE=1 SV=2	HUMAN	40			1.14815	0.694333	1.0666	1.07647	1.22462	0.47863	0.0666381	1.25893	0.383707	0.60256	0.751623	0.489834	1.09648	0.704693	0.824138	0.436516	0.00295448	1.2942	0.343558	0.564937	0.283139	0.00436509	1.45881	0.201372	0.413047	0.235505	0.00301646	1.61436	0.167494	0.380189	0.229087	0.00134457	1.48594	0.17378	0.340408
632	36.76	37.29	70.99	65.14	62.09	sp|Q99536|VAT1_HUMAN	Synaptic vesicle membrane protein VAT-1 homolog OS=Homo sapiens GN=VAT1 PE=1 SV=2	HUMAN	37			0.787046	0.660413	1.14815	0.711214	0.903649	1.28233	0.238038	1.15878	1.10662	1.75388	1.14815	0.349232	1.09648	1.04713	1.65959	1.48594	0.0689589	1.22462	1.21339	2.46604	1.24738	0.311066	1.13763	1.09648	1.99526	2.58226	6.8757e-05	1.47231	1.75388	5.10505	2.12814	0.000466004	1.35519	1.57036	3.87258
633	36.72	52.32	59.15	49.94	38.02	sp|P06737|PYGL_HUMAN	Glycogen phosphorylase, liver form OS=Homo sapiens GN=PYGL PE=1 SV=4	HUMAN	33			1.11686	0.794402	1.13763	0.981748	1.25893	0.912011	0.690343	1.13763	0.809096	1.03753	0.765597	0.211733	1.20226	0.672977	0.92045	0.636796	0.0345321	1.20226	0.524807	0.765597	0.505825	0.0276451	1.36773	0.394457	0.691831	0.83946	0.125785	1.13763	0.731139	0.954993	0.440555	0.107623	1.2942	0.380189	0.570164
634	36.72	37.15	40.56	30.15	25.24	sp|O95373|IPO7_HUMAN	Importin-7 OS=Homo sapiens GN=IPO7 PE=1 SV=1	HUMAN	27			1.10662	0.390068	1.14815	0.963829	1.28233	0.981748	0.870645	1.1695	0.824138	1.14815	0.824138	0.466087	1.19124	0.654636	0.981748	0.691831	0.27542	1.35519	0.519996	0.937562	0.744732	0.616414	1.24738	0.549541	0.928966	0.744732	0.561442	1.2942	0.539511	0.963829	0.648634	0.210481	1.2942	0.363078	0.83946
635	36.69	58.67	61.69	50.31	43.23	sp|Q92841|DDX17_HUMAN	Probable ATP-dependent RNA helicase DDX17 OS=Homo sapiens GN=DDX17 PE=1 SV=1	HUMAN	64			1.00925	0.741756	1.08643	0.928966	1.10662	0.946237	0.560781	1.07647	0.870964	1.01859	1.27057	0.130333	1.14815	1.10662	1.41906	0.928966	0.631323	1.11686	0.831764	1.03753	1.27057	0.174289	1.14815	1.10662	1.52757	1.09648	0.956065	1.07647	1.01859	1.19124	0.981748	0.560109	1.08643	0.903649	1.0666
636	36.67	36.94	76.52	69.34	58.84	sp|Q00325|MPCP_HUMAN	Phosphate carrier protein, mitochondrial OS=Homo sapiens GN=SLC25A3 PE=1 SV=2	HUMAN	28			0.376704	0.0192433	1.6293	0.253513	0.613762	0.816582	0.478429	1.10662	0.751623	0.903649	0.870964	0.193189	1.11686	0.794328	0.972747	1.38038	0.000271729	1.11686	1.23595	1.65959	1.30617	0.00131203	1.13763	1.14815	1.5417	0.432514	0.0796067	1.51356	0.313329	0.654636	0.744732	0.630494	1.18032	0.666807	0.879023
637	36.66	37.96	41.41	25.22	18.16	sp|P14735|IDE_HUMAN	Insulin-degrading enzyme OS=Homo sapiens GN=IDE PE=1 SV=4	HUMAN	21			0.862979	0.239873	1.19124	0.717794	1.02802	0.809096	0.402678	1.27057	0.625173	1.02802	0.963829	0.618723	1.1695	0.824138	1.1272	0.887156	0.552679	1.18032	0.751623	1.04713	0.765597	0.0307116	1.19124	0.654636	0.912011	1.03753	0.6126	1.1695	0.887156	1.21339	0.758578	0.58038	1.28233	0.591562	0.972747
639	36.63	36.87	73.05	60.99	51.54	sp|Q9NXH8|CI167_HUMAN	Torsin family protein C9orf167 OS=Homo sapiens GN=C9orf167 PE=1 SV=2	HUMAN	23			0.731139	0.952383	1.33045	0.554626	0.972747	1.33045	0.111457	1.22462	1.08643	1.67494	1.19124	0.353485	1.15878	1.02802	1.47231	1.2942	0.0227828	1.19124	1.08643	1.83654	1.52757	0.0455827	1.25893	1.21339	2.208	1.6293	0.0114817	1.25893	1.2942	2.44343	0.990832	0.400896	1.19124	0.847227	1.18032
638	36.63	39.15	44.14	33.49	29.67	sp|Q9H5V8|CDCP1_HUMAN	CUB domain-containing protein 1 OS=Homo sapiens GN=CDCP1 PE=1 SV=3	HUMAN	23			0.717794	0.329859	1.31826	0.534564	0.946237	1.21339	0.562978	1.1695	1.03753	1.70608	1	0.510731	1.1272	0.887156	1.30617	1.8197	0.0172884	1.38038	1.31826	3.22107	1.34276	0.0679451	1.21339	1.10662	1.99526	1.57036	0.0256012	1.27057	1.23595	2.29087	1.22462	0.257034	1.15878	1.05682	1.83654
640	36.58	39.57	44.02	37.28	26.04	sp|Q8NE71|ABCF1_HUMAN	ATP-binding cassette sub-family F member 1 OS=Homo sapiens GN=ABCF1 PE=1 SV=2	HUMAN	19			1.09648	0.494001	1.11686	0.981748	1.22462	0.457088	0.161116	1.38038	0.293765	0.630957	0.787046	0.501312	1.14815	0.691831	0.903649	0.787046	0.809595	1.14815	0.691831	0.903649	0.765597	0.663621	1.15878	0.660693	0.887156	0.672977	0.222996	1.22462	0.564937	0.824138	0.570164	0.191249	1.25893	0.440555	0.717794
641	36.52	36.82	54.29	37	32.04	sp|Q14137|BOP1_HUMAN	Ribosome biogenesis protein BOP1 OS=Homo sapiens GN=BOP1 PE=1 SV=2	HUMAN	23			0.895365	0.819304	1.13763	0.794328	1.01859	1.1272	0.191939	1.14815	0.981748	1.34276	1.03753	0.442022	1.1272	0.92045	1.19124	0.570164	0.00457047	1.39316	0.416869	0.794328	0.524807	0.0295561	1.48594	0.356451	0.77983	0.685488	0.318871	1.27057	0.524807	0.870964	0.519996	0.14114	1.48594	0.340408	0.772681
642	36.47	37.04	69.84	62.75	46.96	sp|O60701|UGDH_HUMAN	UDP-glucose 6-dehydrogenase OS=Homo sapiens GN=UGDH PE=1 SV=1	HUMAN	21			1.20226	0.60341	1.13763	1.05682	1.36773	0.751623	0.235847	1.13763	0.666807	0.855067	0.903649	0.614809	1.11686	0.801678	1.00925	0.954993	0.630395	1.11686	0.847227	1.0666	0.672977	0.0681873	1.19124	0.539511	0.801678	1.41906	0.59121	1.22462	1.15878	1.75388	0.731139	0.428414	1.14815	0.648634	0.83946
643	36.4	43.66	75	69.62	66.94	sp|O75367|H2AY_HUMAN	Core histone macro-H2A.1 OS=Homo sapiens GN=H2AFY PE=1 SV=4	HUMAN	56			0.83946	0.871892	1.07647	0.787046	0.903649	1.23595	0.574021	1.18032	1.04713	1.43219	1.72187	0.101459	1.27057	1.35519	2.07014	1.69044	0.103178	1.2942	1.30617	1.99526	1.59956	0.130654	1.28233	1.24738	1.94089	2.22844	0.045937	1.41906	1.57036	2.77971	1.13763	0.122845	1.23595	0.92045	1.28233
644	36.28	41.43	46.8	31.82	21.13	sp|Q9H2G2|SLK_HUMAN	STE20-like serine/threonine-protein kinase OS=Homo sapiens GN=SLK PE=1 SV=1	HUMAN	21			1.20226	0.122039	1.19124	1.00925	1.51356	0.895365	0.693121	1.19124	0.751623	1.0666	0.83946	0.906717	1.22462	0.691831	1.02802	1.00925	0.868544	1.22462	0.824138	1.25893	1.23595	0.246679	1.21339	1.01859	1.52757	0.855067	0.725646	1.21339	0.717794	1.03753	1.2942	0.0749462	1.25893	1.02802	1.87068
645	36.25	37.63	64.93	52.69	38.5	sp|O95831|AIFM1_HUMAN	Apoptosis-inducing factor 1, mitochondrial OS=Homo sapiens GN=AIFM1 PE=1 SV=1	HUMAN	26			0.77983	0.274384	1.11686	0.698232	0.870964	0.847227	0.489803	1.09648	0.765597	0.928966	1.27057	0.477883	1.11686	1.13763	1.40605	1.38038	0.0368446	1.13763	1.21339	1.52757	2.03236	0.00835202	1.33045	1.52757	2.55859	2.07014	0.0106635	1.33045	1.55597	2.42103	1.44544	0.0774077	1.22462	1.18032	1.59956
646	36.23	38.15	74.57	61.97	57.26	sp|Q9UKX7|NUP50_HUMAN	Nuclear pore complex protein Nup50 OS=Homo sapiens GN=NUP50 PE=1 SV=2	HUMAN	29			1.04713	0.590668	1.14815	0.912011	1.22462	0.928966	0.339449	1.15878	0.801678	1.07647	1.33045	0.0843058	1.19124	1.11686	1.58489	0.544503	0.079686	1.43219	0.390841	0.77983	0.510505	0.0639806	1.44544	0.369828	0.737904	0.554626	0.00382333	1.36773	0.37325	0.758578	0.405509	0.0134225	1.61436	0.283139	0.654636
647	36.18	36.36	76.53	72.79	71.09	sp|P45880|VDAC2_HUMAN	Voltage-dependent anion-selective channel protein 2 OS=Homo sapiens GN=VDAC2 PE=1 SV=2	HUMAN	29			0.57544	0.339482	1.28233	0.398107	0.737904	1.2942	0.728673	1.11686	1.15878	1.43219	0.751623	0.207894	1.15878	0.666807	0.870964	1.70608	0.0646189	1.27057	1.34276	2.18776	2.0893	0.0528594	1.2942	1.61436	2.63027	0.862979	0.549292	1.09648	0.772681	0.946237	0.691831	0.998881	1.20226	0.630957	0.831764
648	36.14	37.66	33.15	19.85	12.93	sp|O14981|BTAF1_HUMAN	TATA-binding protein-associated factor 172 OS=Homo sapiens GN=BTAF1 PE=1 SV=2	HUMAN	25			0.903649	0.922433	1.19124	0.751623	1.07647	1.10662	0.962521	1.1695	0.946237	1.2942	0.801678	0.169981	1.19124	0.679204	0.954993	0.903649	0.3638	1.18032	0.772681	1.0666	0.816582	0.157133	1.21339	0.642688	0.990832	0.831764	0.0181071	1.18032	0.704693	0.981748	0.855067	0.202726	1.18032	0.717794	1.00925
649	36.11	36.39	81.5	72.12	65.95	sp|Q15738|NSDHL_HUMAN	Sterol-4-alpha-carboxylate 3-dehydrogenase, decarboxylating OS=Homo sapiens GN=NSDHL PE=1 SV=2	HUMAN	28			0.963829	0.556759	1.1272	0.847227	1.08643	0.972747	0.970072	1.28233	0.862979	1.24738	1.2942	0.499167	1.20226	1.07647	1.65959	1.41906	0.236119	1.20226	1.18032	2.10863	2.29087	0.0255056	1.43219	1.59956	3.37287	1.6293	0.113568	1.28233	1.27057	2.208	1.38038	0.162687	1.25893	1.09648	1.94089
651	36.1	36.5	44.46	30.42	21.82	sp|Q9BZJ0|CRNL1_HUMAN	Crooked neck-like protein 1 OS=Homo sapiens GN=CRNKL1 PE=1 SV=4	HUMAN	19			1.24738	0.292784	1.21339	1.02802	1.58489	0.937562	0.684479	1.34276	0.801678	1.25893	1.36773	0.297177	1.24738	1.09648	1.72187	0.963829	0.911778	1.14815	0.831764	1.10662	0.824138	0.545406	1.19124	0.711214	0.981748	0.963829	0.416474	1.15878	0.83946	1.11686	0.685488	0.120226	1.27057	0.586138	0.870964
650	36.1	36.53	47.99	40.86	31.2	sp|P51116|FXR2_HUMAN	Fragile X mental retardation syndrome-related protein 2 OS=Homo sapiens GN=FXR2 PE=1 SV=2	HUMAN	19			1.28233	0.0821135	1.24738	1.02802	1.5417	1.0666	0.435487	1.24738	0.855067	1.34276	1.20226	0.0870819	1.21339	0.990832	1.45881	0.946237	0.401404	1.20226	0.772681	1.13763	0.758578	0.692228	1.30617	0.591562	0.990832	1.22462	0.465241	1.25893	0.972747	1.48594	0.981748	0.806469	1.21339	0.772681	1.19124
652	36.09	37.94	56.46	47.46	31.2	sp|P52888|THOP1_HUMAN	Thimet oligopeptidase OS=Homo sapiens GN=THOP1 PE=1 SV=2	HUMAN	21			1.00925	0.627713	1.15878	0.870964	1.20226	0.474242	0.203588	1.52757	0.37325	0.724436	0.60256	0.105799	1.31826	0.432514	0.794328	0.564937	0.0857084	1.30617	0.440555	0.737904	0.691831	0.172218	1.20226	0.519996	0.831764	0.49204	0.0810789	1.39316	0.346737	0.685488	0.613762	0.153826	1.23595	0.49204	0.758578
653	36.05	38.84	55.68	47.55	32.62	sp|Q93050|VPP1_HUMAN	V-type proton ATPase 116 kDa subunit a isoform 1 OS=Homo sapiens GN=ATP6V0A1 PE=1 SV=3	HUMAN	29			0.580764	0.0793884	1.43219	0.340408	0.831764	0.895365	0.764935	1.15878	0.772681	1.03753	1.08643	0.993293	1.1272	0.963829	1.27057	1.08643	0.201978	1.1272	0.963829	1.23595	1.33045	0.143299	1.19124	1.11686	1.72187	1.51356	0.00825561	1.23595	1.22462	2.03236	1.15878	0.22187	1.14815	1.00925	1.38038
654	35.98	36.74	52.93	38.38	31.34	sp|O60341|KDM1A_HUMAN	Lysine-specific histone demethylase 1A OS=Homo sapiens GN=KDM1A PE=1 SV=2	HUMAN	19			1.04713	0.822112	1.14815	0.912011	1.21339	1.00925	0.610016	1.1695	0.862979	1.1695	1.10662	0.0411076	1.15878	0.954993	1.31826	0.870964	0.953399	1.23595	0.711214	1.07647	1.08643	0.247811	1.15878	0.937562	1.27057	0.870964	0.744086	1.1695	0.737904	1.01859	0.717794	0.355605	1.2942	0.586138	0.928966
655	35.93	36.33	66.46	57.29	46.88	sp|Q12849|GRSF1_HUMAN	G-rich sequence factor 1 OS=Homo sapiens GN=GRSF1 PE=1 SV=3	HUMAN	27			0.831764	0.729256	1.15878	0.704693	0.963829	0.831764	0.993459	1.13763	0.731139	0.946237	1.01859	0.130959	1.1272	0.903649	1.1695	0.724436	0.750001	1.19124	0.60256	0.862979	0.608135	0.283405	1.22462	0.487529	0.744732	0.387258	0.0618914	1.40605	0.277971	0.544503	0.210863	0.00103152	1.55597	0.159956	0.328095
656	35.91	36.76	67.94	58.53	51.18	sp|P25685|DNJB1_HUMAN	DnaJ homolog subfamily B member 1 OS=Homo sapiens GN=DNAJB1 PE=1 SV=4	HUMAN	29			1.05682	0.615411	1.11686	0.946237	1.18032	0.809096	0.500224	1.10662	0.704693	0.895365	0.946237	0.911092	1.10662	0.855067	1.04713	0.660693	0.26748	1.22462	0.474242	0.809096	0.559758	0.0692816	1.2942	0.413047	0.724436	0.862979	0.371037	1.11686	0.731139	0.963829	0.711214	0.901146	1.18032	0.60256	0.83946
657	35.91	36.69	77.23	69.55	62.13	sp|P13861|KAP2_HUMAN	cAMP-dependent protein kinase type II-alpha regulatory subunit OS=Homo sapiens GN=PRKAR2A PE=1 SV=2	HUMAN	22			1.20226	0.242888	1.22462	0.981748	1.55597	0.928966	0.667248	1.18032	0.816582	1.09648	1.13763	0.60248	1.19124	0.954993	1.43219	0.60256	0.0283856	1.31826	0.501187	0.794328	0.679204	0.00828497	1.19124	0.564937	0.809096	0.981748	0.713551	1.23595	0.855067	1.21339	0.801678	0.613376	1.18032	0.679204	0.946237
658	35.83	36	71.2	58.9	48.69	sp|P21283|VATC1_HUMAN	V-type proton ATPase subunit C 1 OS=Homo sapiens GN=ATP6V1C1 PE=1 SV=4	HUMAN	25			1.05682	0.813365	1.11686	0.946237	1.18032	0.505825	0.904	1.6293	0.416869	0.824138	0.879023	0.772618	1.1272	0.772681	0.990832	1.43219	0.131877	1.23595	1.15878	1.8197	1.45881	0.113059	1.24738	1.1695	1.90546	1.6293	0.066662	1.2942	1.25893	2.07014	1.80302	0.00242169	1.2942	1.39316	2.22844
659	35.81	36.73	55.73	48.39	41.58	sp|P35052|GPC1_HUMAN	Glypican-1 OS=Homo sapiens GN=GPC1 PE=1 SV=2	HUMAN	22			0.642688	0.125329	1.33045	0.444631	0.855067	1.40605	0.0496643	1.27057	1.10662	2.1677	1.11686	0.294365	1.1695	0.954993	1.40605	1.36773	0.143797	1.24738	1.09648	1.83654	1.21339	0.209837	1.24738	0.972747	1.72187	2.24905	6.38635e-05	1.48594	1.51356	4.65586	1.90546	8.94351e-05	1.34276	1.41906	3.0761
660	35.76	37.15	55.12	43.52	40.51	sp|P31040|DHSA_HUMAN	Succinate dehydrogenase [ubiquinone] flavoprotein subunit, mitochondrial OS=Homo sapiens GN=SDHA PE=1 SV=2	HUMAN	31			1.04713	0.356786	1.27057	0.824138	1.18032	1.49968	0.570219	1.22462	1.22462	1.72187	1.95884	0.0244255	1.33045	1.47231	2.22844	1.23595	0.547947	1.20226	1.02802	1.41906	1.27057	0.640039	1.20226	1.05682	1.44544	2.1677	0.00367719	1.39316	1.55597	2.55859	1.87068	0.114297	1.38038	1.35519	2.22844
661	35.72	35.8	64.79	59.73	49.61	sp|P12268|IMDH2_HUMAN	Inosine-5'-monophosphate dehydrogenase 2 OS=Homo sapiens GN=IMPDH2 PE=1 SV=2	HUMAN	23			1.09648	0.918142	1.13763	0.963829	1.33045	0.679204	0.0203195	1.21339	0.487529	0.824138	0.92045	0.948324	1.13763	0.816582	1.04713	0.405509	0.000996471	1.59956	0.210863	0.648634	0.409261	0.000174675	1.58489	0.188799	0.648634	0.570164	0.0132554	1.31826	0.376704	0.751623	0.554626	0.0270592	1.33045	0.390841	0.737904
662	35.71	41.13	54.98	33.8	25.35	sp|Q05682|CALD1_HUMAN	Caldesmon OS=Homo sapiens GN=CALD1 PE=1 SV=3	HUMAN	24			0.92045	0.582868	1.08643	0.847227	1	0.787046	0.185043	1.20226	0.487529	0.946237	1.11686	0.883156	1.13763	0.981748	1.31826	2.10863	2.32121e-05	1.39316	1.51356	3.13329	2.46604	8.62147e-07	1.48594	1.65959	3.76704	0.636796	0.105556	1.33045	0.413047	0.847227	1.15878	0.0380091	1.09648	1.05682	1.25893
663	35.7	36.23	42.32	34.36	27.87	sp|Q8NCN5|PDPR_HUMAN	Pyruvate dehydrogenase phosphatase regulatory subunit, mitochondrial OS=Homo sapiens GN=PDPR PE=1 SV=2	HUMAN	19			1.03753	0.730126	1.15878	0.895365	1.21339	1.36773	0.0428113	1.24738	1.09648	1.72187	1.30617	0.202971	1.23595	1.05682	1.65959	1.31826	0.0280405	1.24738	1.05682	1.94089	1.31826	0.0552027	1.23595	1.0666	1.72187	2.0893	0.000137657	1.47231	1.41906	3.90841	1.23595	0.0165027	1.20226	1.02802	1.77011
664	35.66	35.86	78.61	75.37	61.94	sp|P05121|PAI1_HUMAN	Plasminogen activator inhibitor 1 OS=Homo sapiens GN=SERPINE1 PE=1 SV=1	HUMAN	30			0.862979	0.977039	1.1272	0.704693	0.972747	0.613762	0.216486	1.19124	0.340408	0.731139	0.724436	0.0690414	1.15878	0.474242	0.83946	1.75388	0.0123615	1.31826	1.33045	2.12814	2.18776	0.000977744	1.38038	1.58489	2.91072	0.648634	0.0796573	1.15878	0.401791	0.751623	0.597035	0.136126	1.21339	0.394457	0.724436
665	35.63	36.13	61.72	49.14	43.62	sp|Q9NXV6|CARF_HUMAN	CDKN2A-interacting protein OS=Homo sapiens GN=CDKN2AIP PE=1 SV=3	HUMAN	21			0.597035	0.30802	1.38038	0.376704	0.824138	0.972747	0.882342	1.1695	0.831764	1.13763	1.0666	0.273733	1.15878	0.92045	1.24738	0.731139	0.720937	1.2942	0.544503	0.946237	0.534564	0.251275	1.52757	0.325087	0.816582	0.990832	0.702419	1.18032	0.809096	1.1695	0.954993	0.580634	1.18032	0.816582	1.1272
666	35.59	38.65	46.54	39.25	31.32	sp|Q9Y263|PLAP_HUMAN	Phospholipase A-2-activating protein OS=Homo sapiens GN=PLAA PE=1 SV=2	HUMAN	25			1.11686	0.581725	1.18032	0.946237	1.31826	0.862979	0.231343	1.13763	0.758578	0.981748	1.36773	0.59107	1.23595	1.10662	1.67494	0.83946	0.793854	1.13763	0.704693	0.954993	0.870964	0.909852	1.13763	0.758578	0.990832	1.13763	0.912062	1.18032	0.963829	1.5417	1.24738	0.415364	1.1695	1.0666	1.59956
667	35.56	40.25	44.46	29.51	23.72	sp|O00291|HIP1_HUMAN	Huntingtin-interacting protein 1 OS=Homo sapiens GN=HIP1 PE=1 SV=5	HUMAN	23			0.77983	0.740222	1.27057	0.613762	0.990832	1.1695	0.444278	1.20226	0.972747	1.64437	1.27057	0.591558	1.25893	1.00925	1.85353	1.22462	0.244354	1.19124	1.02802	1.69044	1.34276	0.116051	1.23595	1.08643	2.10863	1.5417	0.228117	1.31826	1.1695	2.55859	1.44544	0.24703	1.27057	1.13763	2.208
668	35.55	35.75	54.11	43.14	37.48	sp|P22307|NLTP_HUMAN	Non-specific lipid-transfer protein OS=Homo sapiens GN=SCP2 PE=1 SV=2	HUMAN	32			1.33045	0.787464	1.21339	1.09648	1.52757	1.08643	0.869843	1.15878	0.937562	1.2942	2.208	0.065956	1.57036	1.40605	3.10456	2.39883	0.0426678	1.57036	1.52757	3.34195	3.19154	0.00436775	1.72187	1.85353	4.69894	2.96483	0.0168044	1.64437	1.80302	4.28549	1.00925	0.258885	1.14815	0.879023	1.25893
669	35.51	36.23	55.03	45.69	36.64	sp|Q9Y426|CU025_HUMAN	C2 domain-containing protein 2 OS=Homo sapiens GN=C2CD2 PE=1 SV=2	HUMAN	28			0.570164	0.183759	1.27057	0.510505	0.724436	1.25893	0.119034	1.10662	1.13763	1.39316	1.14815	0.733207	1.11686	1.02802	1.27057	1.67494	0.0139571	1.1695	1.43219	1.87068	1.80302	0.00622246	1.1695	1.5417	2.1677	1.72187	0.0346777	1.20226	1.43219	2.07014	0.855067	0.97237	1.20226	0.758578	1.02802
670	35.49	37.33	55.73	46.01	34.11	sp|Q6NUQ4|TM214_HUMAN	Transmembrane protein 214 OS=Homo sapiens GN=TMEM214 PE=1 SV=2	HUMAN	23			1.07647	0.204783	1.15878	0.928966	1.28233	1.35519	0.153884	1.28233	1.05682	1.70608	2.14783	0.000561207	1.52757	1.40605	3.90841	1.20226	0.0902255	1.21339	0.990832	1.80302	1.64437	0.04839	1.41906	1.15878	2.53513	2.12814	0.0018563	1.55597	1.36773	4.52898	1.6293	0.0252733	1.39316	1.1695	2.42103
671	35.45	35.52	72.33	64.67	61	sp|O15144|ARPC2_HUMAN	Actin-related protein 2/3 complex subunit 2 OS=Homo sapiens GN=ARPC2 PE=1 SV=1	HUMAN	22			1.05682	0.5494	1.1272	0.937562	1.21339	0.452898	0.149239	1.38038	0.401791	0.625173	0.751623	0.626155	1.20226	0.679204	0.903649	1.01859	0.241974	1.08643	0.937562	1.15878	1.05682	0.280728	1.10662	0.954993	1.1695	1.0666	0.774245	1.10662	0.963829	1.18032	0.895365	0.874066	1.1695	0.816582	1.04713
673	35.41	35.48	85.19	80.42	79.89	sp|Q99497|PARK7_HUMAN	Protein DJ-1 OS=Homo sapiens GN=PARK7 PE=1 SV=2	HUMAN	36			1.39316	0.352327	1.1695	1.19124	1.58489	0.359749	0.0927208	1.36773	0.328095	0.49204	0.787046	0.187806	1.07647	0.737904	0.847227	0.990832	0.673924	1.11686	0.912011	1.10662	0.731139	0.173051	1.10662	0.672977	0.809096	1.08643	0.796362	1.10662	0.981748	1.21339	1.36773	0.3847	1.1695	1.1695	1.57036
672	35.41	38.51	43.05	30.07	18.19	sp|O00203|AP3B1_HUMAN	AP-3 complex subunit beta-1 OS=Homo sapiens GN=AP3B1 PE=1 SV=3	HUMAN	21			0.744732	0.592575	1.30617	0.544503	0.972747	0.831764	0.718728	1.19124	0.642688	0.990832	0.608135	0.183381	1.28233	0.505825	0.77983	0.691831	0.834271	1.35519	0.524807	0.937562	0.794328	0.432138	1.18032	0.685488	0.937562	0.660693	0.258402	1.33045	0.483059	0.879023	0.47863	0.350946	1.47231	0.369828	0.704693
674	35.4	36.84	52.49	45.59	39.49	sp|P35527|K1C9_HUMAN	Keratin, type I cytoskeletal 9 OS=Homo sapiens GN=KRT9 PE=1 SV=3	HUMAN	28			0.816582	0.890342	1.21339	0.648634	0.990832	0.824138	0.124163	1.21339	0.648634	1	0.744732	0.975875	1.25893	0.47863	0.937562	1.58489	0.000279661	1.23595	1.28233	2.18776	1.08643	0.310431	1.15878	0.937562	1.24738	1.41906	0.0917459	1.24738	1.13763	1.99526	0.879023	0.473097	1.19124	0.711214	1.04713
675	35.36	38.22	60.82	51.37	36.28	sp|Q9BW27|NUP85_HUMAN	Nuclear pore complex protein Nup85 OS=Homo sapiens GN=NUP85 PE=1 SV=1	HUMAN	22			0.787046	0.254594	1.19124	0.660693	0.937562	0.963829	0.947855	1.19124	0.801678	1.14815	1.48594	0.0546654	1.28233	1.15878	1.8197	0.903649	0.605712	1.22462	0.731139	1.10662	1.22462	0.870216	1.25893	0.972747	1.48594	1.15878	0.472547	1.20226	0.963829	1.39316	1.09648	0.747931	1.21339	0.903649	1.34276
676	35.33	37.73	78.82	70.62	53.3	sp|P04181|OAT_HUMAN	Ornithine aminotransferase, mitochondrial OS=Homo sapiens GN=OAT PE=1 SV=1	HUMAN	30			0.847227	0.302287	1.09648	0.758578	0.928966	1.38038	0.936639	1.21339	1.13763	1.5417	1.83654	0.139426	1.31826	1.39316	2.0893	1.1272	0.989305	1.08643	1.03753	1.22462	1.41906	0.963956	1.1695	1.21339	1.6293	1.67494	0.148123	1.24738	1.34276	1.90546	1.04713	0.599745	1.1695	0.895365	1.18032
678	35.22	35.69	91.18	82.87	76.32	sp|P42765|THIM_HUMAN	3-ketoacyl-CoA thiolase, mitochondrial OS=Homo sapiens GN=ACAA2 PE=1 SV=2	HUMAN	36			0.711214	0.624193	1.31826	0.619441	0.937562	1.28233	0.29306	1.1695	1.09648	1.52757	1.7378	0.147954	1.36773	1.27057	2.60615	2.55859	0.0216517	1.6293	1.57036	3.80189	2.60615	0.0394143	1.61436	1.61436	3.98107	3.63078	0.000963646	1.83654	1.97697	5.59758	2.22844	0.00863357	1.51356	1.47231	3.13329
8715	35.22	35.69	91.18	82.87	76.32	sp|P42765|THIM_HUMAN	3-ketoacyl-CoA thiolase, mitochondrial OS=Homo sapiens GN=ACAA2 PE=1 SV=2	HUMAN	36			0.711214	0.624193	1.31826	0.619441	0.937562	1.28233	0.29306	1.1695	1.09648	1.52757	1.7378	0.147954	1.36773	1.27057	2.60615	2.55859	0.0216517	1.6293	1.57036	3.80189	2.60615	0.0394143	1.61436	1.61436	3.98107	3.63078	0.000963646	1.83654	1.97697	5.59758	2.22844	0.00863357	1.51356	1.47231	3.13329
677	35.22	36.11	69.65	55.8	46.84	sp|Q13098|CSN1_HUMAN	COP9 signalosome complex subunit 1 OS=Homo sapiens GN=GPS1 PE=1 SV=4	HUMAN	20			1.20226	0.641491	1.14815	1.04713	1.36773	0.870964	0.497142	1.1695	0.751623	1.01859	0.895365	0.585179	1.14815	0.787046	1.02802	0.83946	0.736438	1.1695	0.717794	0.981748	0.744732	0.479189	1.1695	0.654636	0.870964	0.855067	0.713015	1.15878	0.751623	0.990832	0.625173	0.539617	1.28233	0.519996	0.801678
679	35.19	35.49	71.32	61.7	50.57	sp|Q14498|RBM39_HUMAN	RNA-binding protein 39 OS=Homo sapiens GN=RBM39 PE=1 SV=2	HUMAN	35			0.765597	0.908109	1.14815	0.691831	0.879023	1.1695	0.421198	1.09648	1.0666	1.40605	1.35519	0.117255	1.1272	1.20226	1.59956	0.698232	0.18728	1.21339	0.564937	0.847227	0.524807	0.0963833	1.41906	0.428549	0.744732	0.954993	0.902375	1.09648	0.870964	1.04713	0.731139	0.455949	1.13763	0.654636	0.831764
680	35.14	45.01	56.99	42.19	31.12	sp|Q92598|HS105_HUMAN	Heat shock protein 105 kDa OS=Homo sapiens GN=HSPH1 PE=1 SV=1	HUMAN	26			1	0.337481	1.1272	0.887156	1.15878	0.816582	0.719934	1.18032	0.711214	0.963829	0.794328	0.903664	1.1695	0.685488	0.928966	0.794328	0.693532	1.1695	0.685488	0.928966	0.870964	0.844262	1.11686	0.77983	0.972747	0.92045	0.813076	1.11686	0.816582	1.02802	0.711214	0.199883	1.21339	0.496592	0.862979
681	35.12	44.85	22.15	11.3	6.547	sp|Q9NR09|BIRC6_HUMAN	Baculoviral IAP repeat-containing protein 6 OS=Homo sapiens GN=BIRC6 PE=1 SV=2	HUMAN	37			0.870964	0.831267	1.48594	0.731139	1.2942	0.855067	0.116544	1.22462	0.731139	1.04713	0.519996	0.0237437	1.34276	0.432514	0.698232	1.0666	0.672532	1.15878	0.92045	1.2942	0.92045	0.512453	1.21339	0.794328	1.11686	0.539511	0.0325752	1.33045	0.444631	0.717794	0.383707	0.0343383	1.23595	0.322107	0.474242
682	35.12	39.01	45.62	38.2	29.68	sp|Q9UKN8|TF3C4_HUMAN	General transcription factor 3C polypeptide 4 OS=Homo sapiens GN=GTF3C4 PE=1 SV=2	HUMAN	23			1.36773	0.035156	1.23595	1.10662	2.03236	0.972747	0.841784	1.15878	0.83946	1.1272	1.14815	0.0549706	1.18032	0.972747	1.49968	0.711214	0.103976	1.22462	0.586138	0.870964	0.636796	0.204784	1.2942	0.519996	0.824138	0.879023	0.643901	1.21339	0.744732	1.0666	0.990832	0.961899	1.14815	0.831764	1.13763
683	35.01	35.86	47.83	32.54	20.87	sp|O60716|CTND1_HUMAN	Catenin delta-1 OS=Homo sapiens GN=CTNND1 PE=1 SV=1	HUMAN	17			0.870964	0.508862	1.1695	0.704693	1.01859	0.648634	0.163004	1.35519	0.448745	0.879023	0.83946	0.51951	1.1695	0.586138	0.981748	1.07647	0.756891	1.13763	0.946237	1.23595	1.00925	0.728054	1.13763	0.887156	1.14815	0.928966	0.661655	1.15878	0.731139	1.07647	0.787046	0.57756	1.19124	0.660693	0.937562
684	34.96	38.1	38.68	25.46	19.03	sp|Q9H9Y6|RPA2_HUMAN	DNA-directed RNA polymerase I subunit RPA2 OS=Homo sapiens GN=POLR1B PE=1 SV=2	HUMAN	19			0.751623	0.919033	1.24738	0.613762	0.937562	0.954993	0.65422	1.20226	0.794328	1.14815	0.981748	0.352974	1.1695	0.816582	1.14815	0.501187	0.0317789	1.43219	0.288403	0.717794	0.383707	0.0182279	1.52757	0.226986	0.586138	0.597035	0.391248	1.36773	0.383707	0.816582	0.343558	0.000762136	1.70608	0.172187	0.586138
685	34.94	35.58	96.97	90.91	80	sp|P62937|PPIA_HUMAN	Peptidyl-prolyl cis-trans isomerase A OS=Homo sapiens GN=PPIA PE=1 SV=2	HUMAN	75			1.13763	0.633396	1.0666	1.0666	1.20226	0.613762	0.152221	1.11686	0.554626	0.685488	0.648634	0.0681575	1.11686	0.60256	0.724436	0.636796	0.163098	1.08643	0.597035	0.691831	0.549541	0.0086129	1.09648	0.501187	0.60256	0.772681	0.0879335	1.0666	0.704693	0.824138	0.253513	0.0102182	1.10662	0.229087	0.280543
686	34.91	35.44	70.03	63.2	51.34	sp|P37837|TALDO_HUMAN	Transaldolase OS=Homo sapiens GN=TALDO1 PE=1 SV=2	HUMAN	24			1.25893	0.381737	1.09648	1.14815	1.44544	0.301995	0.00613764	1.30617	0.270396	0.394457	0.49204	0.0420195	1.25893	0.448745	0.619441	1.1272	0.501855	1.08643	1.03753	1.27057	1.1695	0.807954	1.07647	1.08643	1.27057	0.831764	0.467036	1.07647	0.77983	0.895365	1.1695	0.17925	1.09648	1.0666	1.31826
687	34.88	35.2	79.7	73.64	66.36	sp|P62136|PP1A_HUMAN	Serine/threonine-protein phosphatase PP1-alpha catalytic subunit OS=Homo sapiens GN=PPP1CA PE=1 SV=1	HUMAN	36			1.18032	0.812758	1.18032	1	1.43219	0.794328	0.888463	1.28233	0.534564	1.01859	1.1695	0.745836	1.15878	1.00925	1.43219	1.13763	0.628316	1.19124	0.954993	1.36773	1.02802	0.986997	1.18032	0.870964	1.22462	1.04713	0.72323	1.20226	0.870964	1.25893	1.00925	0.919914	1.23595	0.816582	1.20226
689	34.85	36.14	66.58	62.84	48.88	sp|Q13561|DCTN2_HUMAN	Dynactin subunit 2 OS=Homo sapiens GN=DCTN2 PE=1 SV=4	HUMAN	26			1	0.692335	1.13763	0.879023	1.1272	0.496592	0.15354	1.39316	0.387258	0.691831	0.711214	0.486321	1.23595	0.559758	0.879023	1.34276	0.238585	1.18032	1.13763	1.52757	1.38038	0.188241	1.21339	1.13763	1.57036	1.07647	0.936594	1.11686	0.963829	1.20226	1.0666	0.685807	1.13763	0.937562	1.20226
688	34.85	38.08	29.94	21.03	12.59	sp|P10586|PTPRF_HUMAN	Receptor-type tyrosine-protein phosphatase F OS=Homo sapiens GN=PTPRF PE=1 SV=2	HUMAN	24			1.03753	0.899295	1.22462	0.847227	1.2942	1.19124	0.173853	1.24738	0.954993	1.44544	1.18032	0.468198	1.22462	0.963829	1.48594	0.794328	0.502016	1.24738	0.613762	0.990832	0.698232	0.985978	1.24738	0.529663	0.870964	1.22462	0.0809519	1.33045	0.92045	1.47231	0.990832	0.916567	1.18032	0.83946	1.1695
690	34.85	35.56	52.54	34.86	29.39	sp|Q8IYB8|SUV3_HUMAN	ATP-dependent RNA helicase SUPV3L1, mitochondrial OS=Homo sapiens GN=SUPV3L1 PE=1 SV=1	HUMAN	22			0.92045	0.992981	1.14815	0.787046	1.05682	1.30617	0.293556	1.15878	1.1272	1.5417	1.44544	0.130994	1.20226	1.20226	1.78649	1.05682	0.914916	1.18032	0.895365	1.22462	1.15878	0.511536	1.14815	1.00925	1.41906	1.38038	0.336024	1.22462	1.1272	1.65959	0.648634	0.167151	1.28233	0.529663	0.831764
691	34.82	35.27	64.68	50.6	41.67	sp|P61011|SRP54_HUMAN	Signal recognition particle 54 kDa protein OS=Homo sapiens GN=SRP54 PE=1 SV=1	HUMAN	21			1.23595	0.660739	1.20226	1.02802	1.43219	1.1695	0.983879	1.1695	1	1.35519	1.47231	0.547735	1.31826	1.11686	1.92309	1.00925	0.970058	1.1272	0.895365	1.13763	1.08643	0.809462	1.14815	0.946237	1.24738	1.14815	0.570279	1.15878	0.990832	1.31826	1.21339	0.932779	1.18032	1.02802	1.40605
692	34.81	37.68	41.93	23.51	14.04	sp|P33527|MRP1_HUMAN	Multidrug resistance-associated protein 1 OS=Homo sapiens GN=ABCC1 PE=1 SV=3	HUMAN	19			1.13763	0.411675	1.23595	0.92045	1.44544	1.20226	0.149589	1.21339	0.990832	1.48594	1.0666	0.295813	1.25893	0.847227	1.31826	1.23595	0.118806	1.24738	0.990832	1.6293	1.13763	0.19303	1.23595	0.92045	1.5417	1.44544	0.0192203	1.31826	1.09648	2.29087	1.07647	0.367682	1.20226	0.895365	1.36773
694	34.77	34.85	64.58	62.12	52.84	sp|P14314|GLU2B_HUMAN	Glucosidase 2 subunit beta OS=Homo sapiens GN=PRKCSH PE=1 SV=2	HUMAN	37			0.666807	0.00526419	1.13763	0.60256	0.758578	1.15878	0.741575	1.0666	1.08643	1.22462	1.57036	0.00396145	1.08643	1.44544	1.69044	1.48594	0.0297148	1.07647	1.38038	1.59956	1.87068	0.000564857	1.09648	1.70608	2.05116	2.01372	0.00120321	1.09648	1.83654	2.208	1.65959	0.0234758	1.08643	1.52757	1.78649
693	34.77	35.44	57.7	45.81	41.52	sp|Q2TAY7|SMU1_HUMAN	WD40 repeat-containing protein SMU1 OS=Homo sapiens GN=SMU1 PE=1 SV=2	HUMAN	27			0.816582	0.951267	1.13763	0.737904	0.928966	0.855067	0.716225	1.10662	0.772681	0.946237	0.963829	0.350975	1.08643	0.879023	1.04713	0.691831	0.372628	1.18032	0.60256	0.816582	0.57544	0.501321	1.28233	0.496592	0.737904	0.855067	0.769853	1.09648	0.77983	0.937562	0.625173	0.755034	1.20226	0.529663	0.751623
695	34.72	35.11	55	33.63	28.25	sp|Q8WTT2|NOC3L_HUMAN	Nucleolar complex protein 3 homolog OS=Homo sapiens GN=NOC3L PE=1 SV=1	HUMAN	25			0.963829	0.776905	1.13763	0.847227	1.09648	0.685488	0.357941	1.31826	0.529663	0.903649	1.59956	0.0106575	1.31826	1.21339	2.10863	0.731139	0.251158	1.25893	0.597035	0.92045	0.816582	0.910771	1.20226	0.642688	0.981748	0.724436	0.238362	1.22462	0.515229	0.887156	0.787046	0.520587	1.1695	0.672977	0.92045
696	34.71	34.99	41.29	26.24	21.51	sp|P98175|RBM10_HUMAN	RNA-binding protein 10 OS=Homo sapiens GN=RBM10 PE=1 SV=3	HUMAN	19			0.963829	0.575189	1.14815	0.83946	1.10662	1	0.422265	1.14815	0.870964	1.14815	1.11686	0.206101	1.14815	0.972747	1.30617	0.717794	0.445771	1.23595	0.510505	0.887156	0.903649	0.905538	1.14815	0.77983	1.03753	0.801678	0.517599	1.19124	0.608135	0.954993	0.862979	0.881406	1.14815	0.758578	0.990832
697	34.62	42.44	34.97	17.95	13.27	sp|O14646|CHD1_HUMAN	Chromodomain-helicase-DNA-binding protein 1 OS=Homo sapiens GN=CHD1 PE=1 SV=2	HUMAN	28			0.794328	0.438281	1.2942	0.619441	1.02802	0.990832	0.408002	1.20226	0.831764	1.19124	0.887156	0.936964	1.21339	0.731139	1.07647	0.625173	0.568463	1.36773	0.487529	0.855067	0.654636	0.999403	1.40605	0.469894	0.92045	0.409261	0.0933112	1.5417	0.316228	0.630957	0.765597	0.926582	1.22462	0.636796	0.937562
698	34.6	34.78	54.74	38.05	32.71	sp|Q9Y3T9|NOC2L_HUMAN	Nucleolar complex protein 2 homolog OS=Homo sapiens GN=NOC2L PE=1 SV=4	HUMAN	27			0.963829	0.374676	1.11686	0.83946	1.07647	1.05682	0.626425	1.09648	0.963829	1.1695	1.23595	0.358723	1.10662	1.11686	1.48594	0.824138	0.0379157	1.20226	0.679204	0.990832	0.847227	0.265157	1.11686	0.765597	0.946237	0.92045	0.191784	1.1272	0.824138	1.03753	0.49204	0.0274123	1.39316	0.376704	0.685488
700	34.58	34.65	85.07	85.07	82.09	sp|Q9H0U4|RAB1B_HUMAN	Ras-related protein Rab-1B OS=Homo sapiens GN=RAB1B PE=1 SV=1	HUMAN	32			0.524807	0.518374	1.38038	0.37325	0.724436	0.461318	0.695277	1.6293	0.353183	0.751623	1.19124	0.827646	1.18032	1.00925	1.40605	1.92309	0.19114	1.39316	1.38038	3.0761	1.67494	0.287858	1.27057	1.31826	2.39883	1.78649	0.463831	1.39316	1.28233	2.91072	1.92309	0.394634	1.43219	1.34276	2.85759
699	34.58	39.33	55.45	45.4	33.52	sp|Q9H078|CLPB_HUMAN	Caseinolytic peptidase B protein homolog OS=Homo sapiens GN=CLPB PE=1 SV=1	HUMAN	24			0.887156	0.749959	1.21339	0.737904	1.07647	0.972747	0.925855	1.18032	0.831764	1.14815	1	0.549224	1.1695	0.855067	1.19124	0.83946	0.928302	1.23595	0.672977	1.03753	0.625173	0.498659	1.43219	0.469894	0.895365	1	0.922717	1.1695	0.855067	1.15878	0.704693	0.627432	1.39316	0.554626	0.981748
701	34.56	37.17	53.62	33.38	26.94	sp|Q96TA1|NIBL1_HUMAN	Niban-like protein 1 OS=Homo sapiens GN=FAM129B PE=1 SV=3	HUMAN	23			0.660693	0.704916	1.27057	0.505825	0.83946	0.564937	0.398002	1.40605	0.416869	0.794328	0.483059	0.0892833	1.58489	0.390841	0.765597	2.0893	0.000106197	1.43219	1.45881	3.28095	1.59956	0.087548	1.30617	1.22462	2.22844	1.51356	0.0493944	1.27057	1.19124	2.0893	1.20226	0.0496465	1.1695	1.02802	1.58489
702	34.55	38.03	35.02	23.16	17.43	sp|Q96JH7|VCIP1_HUMAN	Deubiquitinating protein VCIP135 OS=Homo sapiens GN=VCPIP1 PE=1 SV=2	HUMAN	22			0.937562	0.599567	1.23595	0.772681	1.15878	0.515229	0.0145942	1.58489	0.369828	0.816582	0.92045	0.296942	1.19124	0.765597	1.09648	0.963829	0.997447	1.20226	0.809096	1.15878	0.824138	0.423768	1.23595	0.654636	1.01859	0.855067	0.846911	1.22462	0.691831	1.04713	0.751623	0.315996	1.34276	0.510505	1.00925
703	34.53	35.72	37.72	23.18	18.77	sp|Q9Y6K5|OAS3_HUMAN	2'-5'-oligoadenylate synthase 3 OS=Homo sapiens GN=OAS3 PE=1 SV=3	HUMAN	18			1.11686	0.743829	1.14815	0.972747	1.30617	0.847227	0.475348	1.20226	0.724436	1.01859	1.04713	0.0540793	1.15878	0.903649	1.40605	0.744732	0.620505	1.25893	0.613762	0.937562	0.510505	0.126928	1.49968	0.369828	0.765597	1.1695	0.130871	1.15878	1.00925	1.58489	1.05682	0.146072	1.14815	0.92045	1.28233
704	34.52	34.83	62.27	59.95	46.99	sp|P23526|SAHH_HUMAN	Adenosylhomocysteinase OS=Homo sapiens GN=AHCY PE=1 SV=4	HUMAN	30			1.13763	0.296291	1.08643	1.04713	1.23595	0.510505	0.153737	1.36773	0.413047	0.698232	0.809096	0.806344	1.11686	0.724436	0.903649	0.519996	0.102447	1.33045	0.416869	0.691831	0.413047	0.0621576	1.49968	0.30479	0.619441	0.654636	0.203653	1.20226	0.529663	0.787046	0.469894	0.457672	1.27057	0.409261	0.597035
705	34.48	34.69	64.99	60.18	47.14	sp|Q16181|SEPT7_HUMAN	Septin-7 OS=Homo sapiens GN=SEPT7 PE=1 SV=2	HUMAN	27			0.912011	0.937289	1.27057	0.744732	1.15878	1.40605	0.468762	1.18032	1.19124	1.7378	1.31826	0.349121	1.19124	1.10662	1.70608	1.58489	0.515839	1.25893	1.25893	2.31206	0.895365	0.905724	1.25893	0.751623	1.1272	1.83654	0.179437	1.30617	1.40605	2.88403	1.01859	0.261554	1.20226	0.847227	1.51356
706	34.38	35.13	64.21	52.76	40.7	sp|O75439|MPPB_HUMAN	Mitochondrial-processing peptidase subunit beta OS=Homo sapiens GN=PMPCB PE=1 SV=2	HUMAN	32			0.855067	0.928649	1.11686	0.772681	0.954993	0.731139	0.530316	1.20226	0.642688	0.879023	1.09648	0.348597	1.10662	0.990832	1.24738	0.809096	0.463628	1.14815	0.704693	0.928966	0.801678	0.301618	1.11686	0.654636	0.895365	1.22462	0.0351363	1.1695	1.04713	1.40605	1	0.457454	1.11686	0.895365	1.10662
707	34.37	36.18	67.84	60.26	55.45	sp|Q6DD88|ATLA3_HUMAN	Atlastin-3 OS=Homo sapiens GN=ATL3 PE=1 SV=1	HUMAN	37			0.731139	0.808189	1.1272	0.625173	0.824138	1.05682	0.117652	1.1272	0.937562	1.19124	1.41906	0.0233379	1.13763	1.24738	1.59956	1.15878	0.0510888	1.10662	1.04713	1.25893	1.00925	0.294187	1.10662	0.912011	1.11686	1.19124	0.0792213	1.11686	1.0666	1.31826	0.765597	0.22853	1.18032	0.630957	0.903649
708	34.36	35.86	38.52	25.05	17.58	sp|O14776|TCRG1_HUMAN	Transcription elongation regulator 1 OS=Homo sapiens GN=TCERG1 PE=1 SV=2	HUMAN	20			1.15878	0.737354	1.14815	1.00925	1.33045	1.59956	0.0559148	1.31826	1.21339	2.01372	1.65959	0.0072291	1.25893	1.31826	2.05116	0.597035	0.102496	1.38038	0.440555	0.824138	0.981748	0.872332	1.14815	0.855067	1.1272	0.972747	0.386358	1.14815	0.83946	1.11686	0.515229	0.693916	1.25893	0.436516	0.648634
709	34.32	34.8	67.63	55.07	44.2	sp|O75874|IDHC_HUMAN	Isocitrate dehydrogenase [NADP] cytoplasmic OS=Homo sapiens GN=IDH1 PE=1 SV=2	HUMAN	20			1.39316	0.705105	1.33045	1.04713	1.78649	0.636796	0.877197	1.48594	0.505825	0.946237	0.824138	0.829602	1.24738	0.591562	1.02802	1.69044	0.0446656	1.34276	1.25893	2.37684	1.80302	0.0910387	1.40605	1.28233	2.96483	1.1695	0.620977	1.15878	1.00925	1.39316	1.99526	0.0434345	1.44544	1.38038	3.22107
710	34.31	34.66	54.34	38.41	35.75	sp|Q53GS9|SNUT2_HUMAN	U4/U6.U5 tri-snRNP-associated protein 2 OS=Homo sapiens GN=USP39 PE=1 SV=2	HUMAN	25			0.787046	0.269066	1.19124	0.630957	0.937562	1.09648	0.442888	1.14815	0.954993	1.24738	1.23595	0.133413	1.15878	1.0666	1.45881	0.981748	0.939216	1.15878	0.855067	1.13763	1	0.350059	1.13763	0.879023	1.13763	1.13763	0.731801	1.14815	0.990832	1.30617	0.57544	0.540331	1.38038	0.465586	0.794328
711	34.28	35.22	32.82	17.01	11.78	sp|P48634|PRC2A_HUMAN	Protein PRRC2A OS=Homo sapiens GN=PRRC2A PE=1 SV=3	HUMAN	19			0.946237	0.395479	1.0666	0.887156	1.00925	1.00925	0.912718	1.0666	0.946237	1.07647	0.990832	0.791801	1.0666	0.928966	1.05682	0.981748	0.838644	1.0666	0.92045	1.04713	0.954993	0.158779	1.0666	0.895365	1.01859	0.972747	0.753154	1.0666	0.912011	1.03753	0.981748	0.19249	1.07647	0.912011	1.05682
713	34.22	34.41	74.6	66.67	57.78	sp|P05198|IF2A_HUMAN	Eukaryotic translation initiation factor 2 subunit 1 OS=Homo sapiens GN=EIF2S1 PE=1 SV=3	HUMAN	28			1.15878	0.376104	1.1272	1.02802	1.36773	0.591562	0.0656864	1.33045	0.469894	0.787046	0.972747	0.834585	1.11686	0.879023	1.08643	0.619441	0.0262097	1.28233	0.469894	0.794328	0.619441	0.0305956	1.33045	0.465586	0.824138	0.801678	0.127944	1.15878	0.704693	0.928966	0.619441	0.155389	1.33045	0.529663	0.824138
712	34.22	35.44	70.34	63.52	48.29	sp|Q13601|KRR1_HUMAN	KRR1 small subunit processome component homolog OS=Homo sapiens GN=KRR1 PE=1 SV=4	HUMAN	20			1.05682	0.905919	1.09648	0.963829	1.14815	0.711214	0.251898	1.19124	0.554626	0.847227	1.33045	0.0578513	1.13763	1.1695	1.55597	0.539511	0.0361166	1.36773	0.376704	0.737904	0.855067	0.985903	1.1272	0.737904	0.963829	0.831764	0.330178	1.11686	0.679204	0.928966	0.432514	0.10021	1.39316	0.353183	0.60256
714	34.21	35.52	30.27	21.39	15.61	sp|P78357|CNTP1_HUMAN	Contactin-associated protein 1 OS=Homo sapiens GN=CNTNAP1 PE=1 SV=1	HUMAN	23			0.954993	0.353878	1.20226	0.809096	1.14815	0.83946	0.986311	1.23595	0.648634	1.03753	0.679204	0.81886	1.47231	0.483059	1	1.14815	0.0249527	1.18032	0.972747	1.35519	0.801678	0.55053	1.31826	0.608135	1.05682	0.981748	0.259071	1.23595	0.801678	1.21339	0.685488	0.391971	1.36773	0.539511	0.937562
715	34.2	35.33	59.16	39.53	28.46	sp|Q9UHB6|LIMA1_HUMAN	LIM domain and actin-binding protein 1 OS=Homo sapiens GN=LIMA1 PE=1 SV=1	HUMAN	21			0.946237	0.74703	1.18032	0.787046	1.11686	1.04713	0.864024	1.20226	0.870964	1.24738	1.2942	0.315829	1.28233	1.00925	1.6293	1.61436	0.0521469	1.35519	1.19124	2.37684	1.6293	0.0387027	1.40605	1.15878	2.12814	1.92309	0.0185248	1.52757	1.25893	3.25087	1.49968	0.0680173	1.34276	1.11686	2.07014
716	34.18	35.87	47.4	31.91	26.82	sp|O43592|XPOT_HUMAN	Exportin-T OS=Homo sapiens GN=XPOT PE=1 SV=2	HUMAN	23			0.855067	0.845069	1.1695	0.731139	1	0.648634	0.125299	1.33045	0.534564	0.862979	0.724436	0.517306	1.1695	0.613762	0.847227	0.648634	0.288058	1.27057	0.440555	0.824138	0.831764	0.5394	1.15878	0.711214	0.963829	0.717794	0.343652	1.18032	0.549541	0.847227	0.432514	0.114938	1.39316	0.288403	0.60256
717	34.17	34.59	89.29	87.05	83.04	sp|P30041|PRDX6_HUMAN	Peroxiredoxin-6 OS=Homo sapiens GN=PRDX6 PE=1 SV=3	HUMAN	38			1.49968	0.0550747	1.15878	1.2942	1.80302	0.554626	0.0477472	1.22462	0.487529	0.679204	0.731139	0.35594	1.11686	0.672977	0.816582	0.704693	0.182393	1.08643	0.648634	0.765597	0.444631	0.00364771	1.34276	0.353183	0.597035	0.704693	0.195368	1.15878	0.642688	0.816582	0.510505	0.164705	1.21339	0.440555	0.619441
718	34.15	34.64	56.43	40.48	36.71	sp|Q5JTV8|TOIP1_HUMAN	Torsin-1A-interacting protein 1 OS=Homo sapiens GN=TOR1AIP1 PE=1 SV=2	HUMAN	27			0.57544	0.00896712	1.40605	0.398107	0.809096	1.13763	0.776778	1.14815	0.990832	1.30617	1.15878	0.410579	1.13763	1.01859	1.30617	1.6293	0.0427331	1.2942	1.25893	2.0893	1.6293	0.034929	1.25893	1.2942	2.05116	1.35519	0.15413	1.18032	1.14815	1.58489	1.1695	0.592333	1.13763	1.02802	1.31826
719	34.13	34.31	85.29	71.47	65.17	sp|P20042|IF2B_HUMAN	Eukaryotic translation initiation factor 2 subunit 2 OS=Homo sapiens GN=EIF2S2 PE=1 SV=2	HUMAN	25			1.02802	0.252455	1.09648	0.937562	1.11686	0.831764	0.265923	1.10662	0.679204	0.92045	0.879023	0.403928	1.10662	0.751623	0.972747	0.679204	0.0130916	1.19124	0.529663	0.809096	0.524807	0.000489419	1.34276	0.316228	0.704693	0.660693	0.00253555	1.20226	0.461318	0.794328	0.524807	0.00448316	1.31826	0.331131	0.691831
720	34.04	36.95	90.36	90.36	83.73	sp|P23528|COF1_HUMAN	Cofilin-1 OS=Homo sapiens GN=CFL1 PE=1 SV=3	HUMAN	61			1.38038	0.476468	1.07647	1.28233	1.52757	0.272898	0.0580459	1.22462	0.255859	0.334195	0.613762	0.462609	1.19124	0.544503	0.731139	1.38038	0.482194	1.07647	1.28233	1.55597	1.00925	0.755276	1.04713	0.963829	1.0666	0.963829	0.594577	1.05682	0.912011	1.01859	1.23595	0.455762	1.05682	1.1695	1.36773
721	34.01	34.5	52.49	36.94	27.74	sp|Q2NL82|TSR1_HUMAN	Pre-rRNA-processing protein TSR1 homolog OS=Homo sapiens GN=TSR1 PE=1 SV=1	HUMAN	18			1.35519	0.142211	1.19124	1.13763	1.69044	1.1272	0.678659	1.15878	0.972747	1.31826	1.03753	0.532666	1.14815	0.903649	1.19124	0.597035	0.0213246	1.30617	0.313329	0.77983	0.534564	0.00542502	1.36773	0.235505	0.731139	0.619441	0.0187573	1.27057	0.283139	0.787046	0.619441	0.0637738	1.33045	0.369828	0.824138
722	33.94	47.57	60.57	48.96	40.18	sp|Q96SI9|STRBP_HUMAN	Spermatid perinuclear RNA-binding protein OS=Homo sapiens GN=STRBP PE=1 SV=1	HUMAN	29			1.05682	0.789729	1.13763	0.928966	1.27057	0.847227	0.563572	1.18032	0.724436	1	1.34276	0.11589	1.18032	1.13763	1.83654	1.11686	0.630004	1.15878	0.963829	1.41906	1.13763	0.362714	1.13763	1	1.31826	0.990832	0.789239	1.13763	0.862979	1.1272	1.04713	0.708321	1.13763	0.92045	1.18032
723	33.92	34.01	65.37	55.4	46.54	sp|Q99873|ANM1_HUMAN	Protein arginine N-methyltransferase 1 OS=Homo sapiens GN=PRMT1 PE=1 SV=2	HUMAN	21			1.10662	0.288982	1.08643	1.01859	1.20226	0.685488	0.35604	1.19124	0.608135	0.816582	0.92045	0.918839	1.08643	0.847227	1	0.313329	0.000177524	1.69044	0.177011	0.529663	0.316228	0.000425398	1.69044	0.161436	0.534564	0.37325	0.00178627	1.48594	0.207014	0.554626	0.349945	0.00752689	1.52757	0.2208	0.534564
724	33.83	34.16	51.9	43.09	39.88	sp|Q8WWY3|PRP31_HUMAN	U4/U6 small nuclear ribonucleoprotein Prp31 OS=Homo sapiens GN=PRPF31 PE=1 SV=2	HUMAN	23			0.794328	0.524628	1.20226	0.672977	0.954993	0.963829	0.80378	1.15878	0.704693	1.11686	1.21339	0.0879188	1.15878	1.04713	1.47231	0.963829	0.856439	1.21339	0.83946	1.1695	0.816582	0.612965	1.19124	0.704693	0.972747	0.937562	0.757158	1.1695	0.809096	1.09648	0.912011	0.783019	1.1695	0.794328	1.0666
725	33.82	38.73	46.17	40.69	33.93	sp|Q01813|K6PP_HUMAN	6-phosphofructokinase type C OS=Homo sapiens GN=PFKP PE=1 SV=2	HUMAN	30			1.10662	0.100052	1.11686	0.990832	1.22462	0.737904	0.0645913	1.11686	0.666807	0.824138	0.613762	0.279409	1.1695	0.501187	0.717794	0.879023	0.872073	1.11686	0.787046	0.981748	0.519996	0.831965	1.11686	0.461318	0.580764	0.855067	0.345133	1.1272	0.758578	0.963829	0.580764	0.534976	1.14815	0.505825	0.666807
726	33.81	34.63	57.33	45.48	36.74	sp|Q9UJS0|CMC2_HUMAN	Calcium-binding mitochondrial carrier protein Aralar2 OS=Homo sapiens GN=SLC25A13 PE=1 SV=2	HUMAN	22			0.855067	0.838033	1.21339	0.698232	1.03753	0.608135	0.231901	1.34276	0.416869	0.816582	0.420727	0.0233553	1.65959	0.2208	0.698232	0.981748	0.773619	1.19124	0.809096	1.1695	1.01859	0.36948	1.19124	0.855067	1.21339	0.409261	0.0233122	1.69044	0.235505	0.691831	0.401791	0.00061064	1.69044	0.207014	0.679204
727	33.8	34.38	43.71	31.82	24.27	sp|Q8N766|K0090_HUMAN	Uncharacterized protein KIAA0090 OS=Homo sapiens GN=KIAA0090 PE=1 SV=1	HUMAN	22			0.831764	0.672476	1.1695	0.711214	0.972747	0.619441	0.500915	1.34276	0.465586	0.831764	0.737904	0.421975	1.22462	0.608135	0.903649	0.937562	0.43549	1.14815	0.824138	1.07647	0.847227	0.689166	1.18032	0.717794	1	0.903649	0.423346	1.15878	0.77983	1.04713	0.672977	0.387474	1.22462	0.580764	0.824138
728	33.75	35.29	70.38	66.58	57.47	sp|P31153|METK2_HUMAN	S-adenosylmethionine synthase isoform type-2 OS=Homo sapiens GN=MAT2A PE=1 SV=1	HUMAN	27			1.13763	0.248157	1.13763	1	1.2942	0.461318	0.00882421	1.48594	0.285759	0.685488	0.580764	0.0933392	1.33045	0.440555	0.772681	0.448745	0.0189315	1.48594	0.331131	0.666807	0.413047	0.0306523	1.57036	0.253513	0.648634	0.369828	0.00195329	1.57036	0.194089	0.580764	0.383707	0.0180877	1.57036	0.267917	0.60256
729	33.73	37.28	37.79	24.75	19.26	sp|Q14562|DHX8_HUMAN	ATP-dependent RNA helicase DHX8 OS=Homo sapiens GN=DHX8 PE=1 SV=1	HUMAN	19			1.13763	0.698357	1.23595	0.92045	1.36773	1.14815	0.613054	1.21339	0.946237	1.38038	1.36773	0.216247	1.20226	1.13763	1.61436	1.11686	0.591855	1.21339	0.92045	1.33045	1.07647	0.296752	1.18032	0.912011	1.27057	1.04713	0.617386	1.19124	0.879023	1.25893	0.731139	0.684611	1.27057	0.510505	0.928966
730	33.7	34.66	59.15	41.39	36.59	sp|Q8WYA6|CTBL1_HUMAN	Beta-catenin-like protein 1 OS=Homo sapiens GN=CTNNBL1 PE=1 SV=1	HUMAN	25			0.92045	0.706922	1.1272	0.816582	1.03753	0.895365	0.561018	1.13763	0.787046	1.01859	1.15878	0.17374	1.14815	1.00925	1.35519	0.591562	0.0439332	1.22462	0.501187	0.724436	0.457088	0.000993508	1.41906	0.369828	0.648634	1.03753	0.854507	1.14815	0.903649	1.1695	0.359749	0.0712371	1.27057	0.275423	0.457088
731	33.7	33.93	47.4	33.2	27.19	sp|P48449|ERG7_HUMAN	Lanosterol synthase OS=Homo sapiens GN=LSS PE=1 SV=1	HUMAN	19			0.666807	0.340858	1.21339	0.401791	0.809096	0.862979	0.832768	1.15878	0.731139	1	0.685488	0.750935	1.19124	0.570164	0.816582	1.90546	0.0245263	1.30617	1.45881	2.53513	1.77011	0.0148054	1.31826	1.34276	2.55859	1.80302	0.0142553	1.24738	1.44544	2.208	0.831764	0.127526	1.25893	0.704693	1.04713
732	33.68	33.98	55.89	48.35	38.3	sp|O14744|ANM5_HUMAN	Protein arginine N-methyltransferase 5 OS=Homo sapiens GN=PRMT5 PE=1 SV=4	HUMAN	21			1.52757	0.430482	1.30617	1.1695	1.95884	0.801678	0.392528	1.15878	0.660693	0.928966	0.92045	0.444791	1.15878	0.794328	1.0666	0.83946	0.200373	1.14815	0.731139	0.963829	0.613762	0.123311	1.38038	0.452898	0.847227	0.887156	0.588278	1.14815	0.772681	1.01859	0.724436	0.48042	1.19124	0.57544	0.862979
733	33.65	44.84	48.78	37.19	25.34	sp|O60518|RNBP6_HUMAN	Ran-binding protein 6 OS=Homo sapiens GN=RANBP6 PE=1 SV=2	HUMAN	27			1.01859	0.549866	1.08643	0.937562	1.10662	0.954993	0.424444	1.08643	0.879023	1.03753	0.990832	0.675084	1.08643	0.912011	1.07647	0.990832	0.350169	1.09648	0.903649	1.08643	1	0.848271	1.07647	0.928966	1.07647	1.00925	0.530697	1.08643	0.928966	1.09648	0.954993	0.239341	1.07647	0.887156	1.02802
735	33.64	33.89	78.39	72.26	67.1	sp|Q16831|UPP1_HUMAN	Uridine phosphorylase 1 OS=Homo sapiens GN=UPP1 PE=1 SV=1	HUMAN	28			1.07647	0.845279	1.09648	0.981748	1.18032	0.580764	0.152407	1.36773	0.413047	0.794328	0.461318	0.0113318	1.5417	0.325087	0.711214	1.25893	0.826568	1.1272	1.11686	1.47231	1.57036	0.520591	1.22462	1.28233	2.05116	1.09648	0.799729	1.10662	0.990832	1.21339	0.946237	0.769581	1.10662	0.855067	1.04713
734	33.64	34.45	49.77	43.12	39.57	sp|P10515|ODP2_HUMAN	Dihydrolipoyllysine-residue acetyltransferase component of pyruvate dehydrogenase complex, mitochondrial OS=Homo sapiens GN=DLAT PE=1 SV=3	HUMAN	22			1.22462	0.628664	1.20226	1.01859	1.55597	1.05682	0.365178	1.1695	0.903649	1.27057	1.80302	0.0176265	1.35519	1.33045	2.29087	1.59956	0.0584174	1.2942	1.23595	2.0893	1.45881	0.0993872	1.25893	1.15878	1.88799	1.97697	0.00998212	1.35519	1.45881	2.75423	1.55597	0.0731973	1.35519	1.14815	1.95884
736	33.58	33.91	33.31	21.57	14.97	sp|Q9P265|DIP2B_HUMAN	Disco-interacting protein 2 homolog B OS=Homo sapiens GN=DIP2B PE=1 SV=3	HUMAN	19			1.02802	0.946483	1.07647	0.954993	1.10662	1	0.837091	1.08643	0.92045	1.08643	1.00925	0.929706	1.08643	0.928966	1.09648	0.990832	0.379707	1.08643	0.912011	1.07647	1.03753	0.410673	1.0666	0.972747	1.10662	1	0.911681	1.07647	0.928966	1.07647	0.981748	0.600807	1.09648	0.895365	1.07647
737	33.56	33.77	80.78	67.62	62.28	sp|P29692|EF1D_HUMAN	Elongation factor 1-delta OS=Homo sapiens GN=EEF1D PE=1 SV=5	HUMAN	42			1.10662	0.67254	1.07647	1.02802	1.19124	0.534564	0.074378	1.23595	0.413047	0.660693	0.711214	0.527915	1.08643	0.619441	0.772681	0.529663	0.080216	1.19124	0.436516	0.630957	0.380189	0.018064	1.36773	0.288403	0.519996	0.416869	0.0170143	1.27057	0.30479	0.529663	0.409261	0.0138582	1.21339	0.30761	0.496592
738	33.53	40.58	69.88	68.19	61.69	sp|P52597|HNRPF_HUMAN	Heterogeneous nuclear ribonucleoprotein F OS=Homo sapiens GN=HNRNPF PE=1 SV=3	HUMAN	72			0.928966	0.826235	1.0666	0.879023	0.990832	1.20226	0.650014	1.09648	1.09648	1.2942	1.78649	0.0500179	1.24738	1.43219	2.03236	0.529663	0.0679257	1.24738	0.457088	0.660693	0.564937	0.0770796	1.19124	0.465586	0.672977	0.981748	0.819052	1.0666	0.912011	1.04713	0.809096	0.272642	1.0666	0.751623	0.862979
740	33.52	34.05	80.47	71.6	61.54	sp|O95433|AHSA1_HUMAN	Activator of 90 kDa heat shock protein ATPase homolog 1 OS=Homo sapiens GN=AHSA1 PE=1 SV=1	HUMAN	32			1.01859	0.317258	1.09648	0.928966	1.10662	0.564937	0.0240989	1.31826	0.440555	0.744732	0.809096	0.217333	1.10662	0.704693	0.895365	0.529663	0.000221657	1.34276	0.390841	0.711214	0.444631	0.00038331	1.40605	0.296483	0.625173	0.465586	0.00161441	1.43219	0.346737	0.666807	0.413047	6.26061e-05	1.52757	0.310456	0.630957
739	33.52	34.13	77.33	64.74	57.93	sp|Q9BWD1|THIC_HUMAN	Acetyl-CoA acetyltransferase, cytosolic OS=Homo sapiens GN=ACAT2 PE=1 SV=2	HUMAN	24			1.47231	0.0621499	1.21339	1.21339	1.80302	0.765597	0.789759	1.14815	0.660693	0.879023	0.895365	0.687984	1.1272	0.809096	1.00925	0.928966	0.783732	1.15878	0.831764	1.07647	0.724436	0.424428	1.15878	0.654636	0.83946	1.1695	0.196785	1.1272	1.03753	1.38038	1.18032	0.0624477	1.14815	1.02802	1.5417
741	33.48	35.26	28.36	16.18	9.008	sp|Q9UPU5|UBP24_HUMAN	Ubiquitin carboxyl-terminal hydrolase 24 OS=Homo sapiens GN=USP24 PE=1 SV=3	HUMAN	23			0.855067	0.644217	1.24738	0.619441	1.0666	0.679204	0.63652	1.36773	0.570164	0.928966	0.685488	0.0888419	1.2942	0.570164	0.887156	0.724436	0.298657	1.34276	0.586138	0.972747	0.758578	0.438355	1.30617	0.57544	0.990832	0.824138	0.0608373	1.21339	0.672977	1	0.49204	0.0545217	1.44544	0.409261	0.711214
742	33.46	34.25	66.4	62.53	45.21	sp|P43490|NAMPT_HUMAN	Nicotinamide phosphoribosyltransferase OS=Homo sapiens GN=NAMPT PE=1 SV=1	HUMAN	22			1.2942	0.11036	1.19124	1.08643	1.5417	0.544503	0.0778771	1.44544	0.405509	0.787046	0.580764	0.452977	1.36773	0.496592	0.794328	0.630957	0.238824	1.27057	0.519996	0.801678	0.383707	0.0195766	1.72187	0.237684	0.660693	0.554626	0.0960613	1.39316	0.444631	0.772681	0.765597	0.783159	1.14815	0.613762	0.879023
743	33.46	34.08	47	34.08	24.91	sp|Q9H8H2|DDX31_HUMAN	Probable ATP-dependent RNA helicase DDX31 OS=Homo sapiens GN=DDX31 PE=1 SV=2	HUMAN	21			1.15878	0.614486	1.1695	0.990832	1.39316	0.92045	0.190728	1.1695	0.772681	1.07647	1.09648	0.562375	1.1695	0.937562	1.2942	0.619441	0.0316994	1.34276	0.387258	0.831764	0.505825	0.00433081	1.49968	0.277971	0.758578	0.608135	0.0482435	1.36773	0.452898	0.831764	0.711214	0.0589267	1.23595	0.510505	0.879023
744	33.42	36.79	73.61	57.99	51.74	sp|Q02878|RL6_HUMAN	60S ribosomal protein L6 OS=Homo sapiens GN=RPL6 PE=1 SV=3	HUMAN	30			1.05682	0.380805	1.0666	0.990832	1.11686	0.539511	0.132165	1.28233	0.483059	0.691831	0.758578	0.917474	1.11686	0.704693	0.847227	0.539511	0.0541552	1.23595	0.487529	0.666807	0.288403	0.000391186	1.65959	0.235505	0.47863	0.369828	0.0207405	1.40605	0.30761	0.519996	0.47863	0.020437	1.28233	0.416869	0.613762
745	33.39	39.33	42.36	30.07	20.95	sp|Q96KR1|ZFR_HUMAN	Zinc finger RNA-binding protein OS=Homo sapiens GN=ZFR PE=1 SV=2	HUMAN	22			0.648634	0.569985	1.36773	0.524807	0.887156	0.457088	0.543636	1.69044	0.310456	0.772681	1.25893	0.130873	1.23595	1.01859	1.80302	0.937562	0.964379	1.27057	0.77983	1.19124	0.801678	0.70486	1.21339	0.660693	0.972747	1.04713	0.987499	1.21339	0.862979	1.38038	0.704693	0.475264	1.27057	0.57544	0.895365
746	33.38	34.35	73.06	62.14	51.94	sp|P07339|CATD_HUMAN	Cathepsin D OS=Homo sapiens GN=CTSD PE=1 SV=1	HUMAN	40			0.642688	0.336952	1.30617	0.570164	0.83946	0.847227	0.792822	1.11686	0.765597	0.946237	1.18032	0.616071	1.1695	1.00925	1.59956	2.31206	0.000896245	1.47231	1.57036	3.37287	2.83139	0.000275894	1.55597	1.8197	4.57088	2.24905	0.00295179	1.40605	1.59956	3.76704	1.90546	0.00974382	1.35519	1.40605	2.88403
747	33.36	54.62	87.1	79.26	66.82	sp|P09104|ENOG_HUMAN	Gamma-enolase OS=Homo sapiens GN=ENO2 PE=1 SV=3	HUMAN	81			0.928966	0.926086	1.10662	0.83946	1.02802	1.1272	0.603289	1.10662	1.01859	1.23595	0.912011	0.367293	1.11686	0.737904	1.01859	1.90546	0.00133566	1.36773	1.39316	2.72898	1.59956	0.0308923	1.2942	1.23595	2.22844	2.46604	0.00364701	1.45881	1.69044	3.66438	2.05116	0.00374752	1.38038	1.48594	2.70396
748	33.36	36.17	43.88	28.54	20.93	sp|O15397|IPO8_HUMAN	Importin-8 OS=Homo sapiens GN=IPO8 PE=1 SV=2	HUMAN	22			0.831764	0.659601	1.31826	0.691831	1.09648	0.92045	0.744645	1.18032	0.787046	1.08643	0.619441	0.03297	1.18032	0.524807	0.731139	1.00925	0.579908	1.19124	0.847227	1.21339	0.895365	0.645246	1.20226	0.758578	1.07647	1.35519	0.58156	1.24738	1.08643	1.72187	0.613762	0.244671	1.18032	0.524807	0.724436
749	33.33	35.61	53.64	49.45	44.59	sp|P36957|ODO2_HUMAN	Dihydrolipoyllysine-residue succinyltransferase component of 2-oxoglutarate dehydrogenase complex, mitochondrial OS=Homo sapiens GN=DLST PE=1 SV=4	HUMAN	33			0.758578	0.769692	1.09648	0.685488	0.831764	1.95884	0.217982	1.44544	1.35519	2.39883	1.90546	0.164917	1.45881	1.30617	2.53513	1.94089	0.0593498	1.43219	1.35519	2.63027	1.95884	0.00970362	1.43219	1.36773	2.53513	3.01995	0.00376052	1.70608	1.77011	4.13048	1.57036	0.0671421	1.38038	1.13763	1.88799
750	33.32	36.51	67.56	52.29	38.74	sp|Q9BZZ5|API5_HUMAN	Apoptosis inhibitor 5 OS=Homo sapiens GN=API5 PE=1 SV=3	HUMAN	26			1.41906	0.213542	1.22462	1.15878	1.70608	0.92045	0.344042	1.08643	0.847227	1	1.6293	0.0238676	1.24738	1.30617	2.14783	0.711214	0.0404935	1.09648	0.648634	0.77983	1.20226	0.869869	1.13763	1.05682	1.36773	1.30617	0.327205	1.15878	1.1272	1.5417	0.887156	0.687953	1.13763	0.801678	1.00925
751	33.26	33.47	59.63	53.6	42.46	sp|P55010|IF5_HUMAN	Eukaryotic translation initiation factor 5 OS=Homo sapiens GN=EIF5 PE=1 SV=2	HUMAN	19			1.10662	0.144585	1.10662	1	1.22462	0.679204	0.179614	1.22462	0.608135	0.831764	0.758578	0.969305	1.18032	0.666807	0.895365	0.698232	0.195312	1.19124	0.47863	0.831764	0.83946	0.948657	1.1272	0.758578	0.946237	0.515229	0.272063	1.35519	0.394457	0.698232	0.296483	0.141765	1.41906	0.195884	0.420727
752	33.24	33.54	67.23	53.49	47.15	sp|O15269|SPTC1_HUMAN	Serine palmitoyltransferase 1 OS=Homo sapiens GN=SPTLC1 PE=1 SV=1	HUMAN	27			0.981748	0.551374	1.11686	0.862979	1.09648	0.717794	0.728605	1.27057	0.591562	0.912011	0.963829	0.784791	1.13763	0.855067	1.09648	1.64437	0.00547435	1.2942	1.27057	2.24905	1.36773	0.0775363	1.20226	1.13763	1.83654	1.19124	0.437217	1.14815	1.03753	1.45881	0.731139	0.186339	1.27057	0.642688	0.928966
753	33.19	33.82	33.22	21.6	15.75	sp|O60244|MED14_HUMAN	Mediator of RNA polymerase II transcription subunit 14 OS=Homo sapiens GN=MED14 PE=1 SV=2	HUMAN	25			0.972747	0.752178	1.07647	0.903649	1.04713	0.954993	0.485119	1.07647	0.887156	1.02802	1	0.574389	1.08643	0.92045	1.08643	0.963829	0.64982	1.0666	0.903649	1.02802	0.946237	0.752175	1.08643	0.870964	1.02802	1.00925	0.905635	1.0666	0.946237	1.07647	0.946237	0.561755	1.07647	0.879023	1.01859
754	33.17	39.59	56.59	44.81	35.97	sp|Q6PI48|SYDM_HUMAN	Aspartyl-tRNA synthetase, mitochondrial OS=Homo sapiens GN=DARS2 PE=1 SV=1	HUMAN	22			0.895365	0.522244	1.13763	0.787046	1.01859	0.887156	0.627942	1.1272	0.77983	1	1.08643	0.893513	1.18032	0.92045	1.28233	0.887156	0.796552	1.13763	0.772681	1.00925	0.954993	0.775952	1.1695	0.831764	1.11686	1.1272	0.770207	1.19124	0.946237	1.43219	0.946237	0.52657	1.1272	0.831764	1.0666
755	33.14	35.99	52.67	35.73	31.2	sp|P22033|MUTA_HUMAN	Methylmalonyl-CoA mutase, mitochondrial OS=Homo sapiens GN=MUT PE=1 SV=4	HUMAN	22			0.648634	0.937772	1.22462	0.515229	0.794328	0.981748	0.724399	1.13763	0.862979	1.11686	0.724436	0.639057	1.25893	0.570164	0.912011	1.44544	0.0851321	1.21339	1.19124	1.70608	1.48594	0.0265182	1.23595	1.20226	1.72187	1.78649	0.00499223	1.38038	1.2942	2.24905	0.937562	0.346256	1.13763	0.824138	1.0666
756	33.13	35.76	43.12	30.07	21.41	sp|Q9Y4E8|UBP15_HUMAN	Ubiquitin carboxyl-terminal hydrolase 15 OS=Homo sapiens GN=USP15 PE=1 SV=3	HUMAN	21			1.45881	0.129556	1.25893	1.15878	1.85353	0.928966	0.711958	1.21339	0.765597	1.1272	0.879023	0.56593	1.23595	0.685488	1.08643	1.08643	0.936864	1.19124	0.912011	1.28233	0.847227	0.200188	1.23595	0.666807	1.04713	0.660693	0.16075	1.35519	0.413047	0.895365	0.672977	0.0957835	1.33045	0.457088	0.895365
757	33.11	35.16	46.05	35.69	24.1	sp|Q9UI26|IPO11_HUMAN	Importin-11 OS=Homo sapiens GN=IPO11 PE=1 SV=1	HUMAN	18			0.855067	0.771633	1.21339	0.685488	1.03753	0.711214	0.387792	1.28233	0.554626	0.912011	0.636796	0.231405	1.35519	0.416869	0.862979	0.765597	0.200666	1.20226	0.625173	0.92045	0.570164	0.0981827	1.40605	0.432514	0.801678	0.534564	0.0236379	1.39316	0.349945	0.744732	0.432514	0.0189869	1.59956	0.310456	0.691831
758	33.1	34.57	80.34	66.55	61.72	sp|P30084|ECHM_HUMAN	Enoyl-CoA hydratase, mitochondrial OS=Homo sapiens GN=ECHS1 PE=1 SV=4	HUMAN	35			1.1695	0.746489	1.10662	1.05682	1.28233	1.55597	0.122155	1.21339	1.28233	1.88799	2.51189	0.0479232	1.41906	1.77011	3.40408	1.6293	0.11186	1.22462	1.33045	1.97697	1.57036	0.212306	1.1695	1.34276	1.78649	2.24905	0.00534556	1.34276	1.67494	2.85759	1.7378	0.0805748	1.23595	1.40605	2.14783
759	33.1	33.59	38.87	29.15	22.05	sp|O75400|PR40A_HUMAN	Pre-mRNA-processing factor 40 homolog A OS=Homo sapiens GN=PRPF40A PE=1 SV=2	HUMAN	21			0.77983	0.694413	1.19124	0.679204	0.928966	0.963829	0.590632	1.10662	0.870964	1.0666	1.40605	0.00592947	1.19124	1.18032	1.69044	0.954993	0.974943	1.11686	0.870964	1.0666	1.00925	0.900124	1.10662	0.912011	1.11686	1.21339	0.45204	1.14815	1.05682	1.45881	0.613762	0.906241	1.38038	0.452898	0.847227
760	33.04	33.56	37.12	27.82	22.37	sp|Q15334|L2GL1_HUMAN	Lethal(2) giant larvae protein homolog 1 OS=Homo sapiens GN=LLGL1 PE=1 SV=3	HUMAN	18			1.18032	0.811784	1.25893	0.937562	1.52757	1.69044	0.0579181	1.41906	1.19124	2.53513	1.2942	0.631813	1.23595	1.04713	1.6293	1.65959	0.422377	1.49968	1.10662	2.26986	1.69044	0.300498	1.47231	1.14815	2.24905	2.0893	0.0308997	1.57036	1.33045	3.37287	1.77011	0.142597	1.52757	1.15878	3.13329
761	33.01	33.13	88.78	88.29	88.29	sp|P04792|HSPB1_HUMAN	Heat shock protein beta-1 OS=Homo sapiens GN=HSPB1 PE=1 SV=2	HUMAN	61			1.31826	0.489586	1.0666	1.23595	1.40605	0.277971	0.00462729	1.1272	0.239883	0.313329	0.559758	0.016497	1.14815	0.483059	0.642688	1.24738	0.727428	1.05682	1.18032	1.30617	1.21339	0.858826	1.0666	1.13763	1.27057	0.831764	0.249187	1.04713	0.772681	0.870964	1.00925	0.736253	1.07647	0.937562	1.0666
765	32.98	33.26	59.4	54.38	44.69	sp|Q99829|CPNE1_HUMAN	Copine-1 OS=Homo sapiens GN=CPNE1 PE=1 SV=1	HUMAN	27			1.13763	0.982906	1.1272	1.00925	1.33045	0.534564	0.324636	1.30617	0.428549	0.698232	0.469894	0.151612	1.31826	0.387258	0.619441	1.41906	0.692659	1.20226	1.18032	1.61436	0.895365	0.522689	1.11686	0.801678	1	1.10662	0.83267	1.1272	0.981748	1.23595	0.636796	0.841861	1.20226	0.564937	0.765597
763	32.98	33.51	60.26	47.45	33.07	sp|Q15436|SC23A_HUMAN	Protein transport protein Sec23A OS=Homo sapiens GN=SEC23A PE=1 SV=2	HUMAN	23			0.981748	0.888269	1.14815	0.855067	1.1272	1.02802	0.335124	1.18032	0.870964	1.21339	0.879023	0.765869	1.19124	0.744732	1.04713	1.09648	0.1498	1.18032	0.928966	1.2942	1.48594	0.137953	1.24738	1.19124	1.85353	1.30617	0.0793728	1.1695	1.11686	1.49968	0.831764	0.758405	1.15878	0.704693	0.963829
762	32.98	35.31	53.29	42.43	34.05	sp|Q8TAT6|NPL4_HUMAN	Nuclear protein localization protein 4 homolog OS=Homo sapiens GN=NPLOC4 PE=1 SV=3	HUMAN	21			1.1272	0.963997	1.13763	0.990832	1.30617	0.77983	0.372028	1.21339	0.679204	0.946237	1	0.860629	1.1272	0.887156	1.1272	0.990832	0.994487	1.13763	0.870964	1.1272	1.11686	0.856875	1.14815	0.972747	1.38038	1.6293	0.0907194	1.2942	1.25893	2.33346	0.794328	0.920148	1.18032	0.698232	0.937562
764	32.98	33.3	41.17	33.09	26.7	sp|Q96QC0|PP1RA_HUMAN	Serine/threonine-protein phosphatase 1 regulatory subunit 10 OS=Homo sapiens GN=PPP1R10 PE=1 SV=1	HUMAN	19			0.946237	0.914682	1.13763	0.824138	1.07647	0.855067	0.852258	1.20226	0.737904	1.02802	1.59956	0.01876	1.31826	1.21339	2.37684	1.07647	0.657384	1.14815	0.937562	1.24738	1.33045	0.28932	1.23595	1.07647	1.72187	1.67494	0.0189933	1.2942	1.2942	2.31206	1.39316	0.0907513	1.23595	1.1272	1.78649
766	32.96	33.52	35.68	28.64	24.5	sp|P30530|UFO_HUMAN	Tyrosine-protein kinase receptor UFO OS=Homo sapiens GN=AXL PE=1 SV=3	HUMAN	20			0.824138	0.458129	1.21339	0.672977	1	0.698232	0.276076	1.34276	0.469894	0.937562	0.524807	0.0819029	1.5417	0.356451	0.809096	1.38038	0.0128876	1.21339	1.13763	1.69044	1.31826	0.341914	1.23595	1.0666	1.67494	0.465586	0.142494	1.77011	0.301995	0.824138	0.394457	0.0522491	1.92309	0.235505	0.758578
767	32.95	34.23	50.27	40.03	32.51	sp|P13798|ACPH_HUMAN	Acylamino-acid-releasing enzyme OS=Homo sapiens GN=APEH PE=1 SV=4	HUMAN	23			0.946237	0.791578	1.15878	0.816582	1.09648	0.816582	0.34004	1.19124	0.613762	0.972747	0.831764	0.308453	1.19124	0.625173	0.990832	1	0.894474	1.14815	0.870964	1.14815	0.809096	0.495412	1.20226	0.642688	0.972747	1.11686	0.765065	1.14815	0.972747	1.31826	0.831764	0.663609	1.21339	0.654636	1.00925
768	32.91	33.2	85.47	80.28	74.39	sp|P00491|PNPH_HUMAN	Purine nucleoside phosphorylase OS=Homo sapiens GN=PNP PE=1 SV=2	HUMAN	35			1.19124	0.462514	1.1272	1.05682	1.30617	0.625173	0.372145	1.1695	0.544503	0.731139	0.648634	0.406593	1.14815	0.496592	0.744732	0.619441	0.462201	1.15878	0.487529	0.717794	0.524807	0.224938	1.25893	0.37325	0.660693	0.847227	0.897756	1.08643	0.765597	0.92045	0.895365	0.563133	1.07647	0.801678	0.963829
769	32.88	37.09	43.72	31.51	20.93	sp|Q5C9Z4|NOM1_HUMAN	Nucleolar MIF4G domain-containing protein 1 OS=Homo sapiens GN=NOM1 PE=1 SV=1	HUMAN	21			0.879023	0.881638	1.18032	0.679204	1.03753	1.03753	0.685502	1.18032	0.879023	1.21339	1.64437	0.237153	1.27057	1.2942	2.05116	0.608135	0.265704	1.27057	0.469894	0.772681	1.05682	0.742592	1.18032	0.895365	1.23595	0.954993	0.543055	1.1695	0.772681	1.11686	0.831764	0.937126	1.15878	0.704693	0.963829
771	32.81	32.8	82.54	81.75	71.43	sp|P58876|H2B1D_HUMAN	Histone H2B type 1-D OS=Homo sapiens GN=HIST1H2BD PE=1 SV=2	HUMAN	132			0.981748	0.228198	1.00925	0.972747	0.990832	0.990832	0.725077	1.00925	0.981748	1	1.01859	0.0494582	1.00925	1.00925	1.02802	1	0.415997	1.00925	0.990832	1.00925	1.01859	0.0197091	1.00925	1.00925	1.02802	0.963829	0.165807	1.00925	0.954993	0.972747	0.963829	0.984358	1.00925	0.954993	0.972747
770	32.81	33.95	49.59	39.95	28.13	sp|Q6PJT7|ZC3HE_HUMAN	Zinc finger CCCH domain-containing protein 14 OS=Homo sapiens GN=ZC3H14 PE=1 SV=1	HUMAN	22			0.903649	0.716954	1.18032	0.737904	1.0666	0.946237	0.986323	1.15878	0.772681	1.09648	1.20226	0.560655	1.1695	1.02802	1.59956	1.04713	0.995233	1.14815	0.912011	1.21339	1.1272	0.943873	1.1695	0.963829	1.31826	1.10662	0.800443	1.15878	0.954993	1.2942	0.903649	0.496771	1.20226	0.691831	1.08643
772	32.75	33.38	52.05	37.72	33.04	sp|Q9Y450|HBS1L_HUMAN	HBS1-like protein OS=Homo sapiens GN=HBS1L PE=1 SV=1	HUMAN	17			0.990832	0.296834	1.20226	0.83946	1.19124	0.711214	0.048514	1.24738	0.49204	0.887156	0.92045	0.267642	1.19124	0.772681	1.09648	1.01859	0.334624	1.18032	0.862979	1.23595	1	0.488786	1.18032	0.847227	1.21339	0.816582	0.0770121	1.21339	0.660693	0.990832	0.787046	0.080177	1.23595	0.57544	0.972747
773	32.73	33.34	62.87	45.92	37.9	sp|Q16881|TRXR1_HUMAN	Thioredoxin reductase 1, cytoplasmic OS=Homo sapiens GN=TXNRD1 PE=1 SV=3	HUMAN	27			1.35519	0.091161	1.21339	1.11686	1.64437	0.636796	0.0314125	1.33045	0.47863	0.847227	0.879023	0.918901	1.11686	0.77983	0.981748	1.03753	0.800058	1.13763	0.912011	1.15878	1.22462	0.428927	1.1695	1.04713	1.41906	1.07647	0.657772	1.11686	0.963829	1.24738	1.11686	0.256267	1.1272	0.990832	1.25893
774	32.72	37.94	76.9	66.24	57.11	sp|P61160|ARP2_HUMAN	Actin-related protein 2 OS=Homo sapiens GN=ACTR2 PE=1 SV=1	HUMAN	39			0.912011	0.778376	1.13763	0.731139	1.03753	0.824138	0.41895	1.13763	0.717794	0.937562	0.698232	0.173478	1.23595	0.570164	0.862979	1.65959	0.154601	1.30617	1.27057	2.07014	1.58489	0.222134	1.28233	1.23595	1.97697	0.990832	0.877539	1.13763	0.879023	1.1272	1.03753	0.771724	1.13763	0.912011	1.18032
775	32.71	34.88	29.64	19.71	14.2	sp|O75976|CBPD_HUMAN	Carboxypeptidase D OS=Homo sapiens GN=CPD PE=1 SV=2	HUMAN	20			0.887156	0.393692	1.19124	0.717794	1.05682	0.963829	0.81837	1.18032	0.824138	1.13763	0.981748	0.637432	1.1695	0.83946	1.14815	1.39316	0.128391	1.21339	1.14815	1.94089	1.21339	0.295592	1.1695	1.03753	1.55597	1.04713	0.982157	1.1695	0.895365	1.25893	0.895365	0.311327	1.20226	0.648634	1.07647
776	32.69	33.01	66.25	48.96	44.79	sp|P11172|UMPS_HUMAN	Uridine 5'-monophosphate synthase OS=Homo sapiens GN=UMPS PE=1 SV=1	HUMAN	18			1.0666	0.295311	1.15878	0.92045	1.24738	0.413047	0.116379	1.67494	0.343558	0.691831	0.465586	0.00451921	1.47231	0.331131	0.685488	0.319154	0.00971793	1.7378	0.205116	0.554626	0.461318	0.0155408	1.45881	0.30761	0.672977	0.636796	0.12106	1.24738	0.544503	0.794328	0.387258	0.00770305	1.51356	0.316228	0.586138
777	32.67	46.52	55.75	50.78	42.39	sp|Q96AE4|FUBP1_HUMAN	Far upstream element-binding protein 1 OS=Homo sapiens GN=FUBP1 PE=1 SV=3	HUMAN	35			0.772681	0.913282	1.13763	0.636796	0.879023	0.831764	0.859017	1.11686	0.751623	0.928966	0.963829	0.614239	1.09648	0.887156	1.05682	0.436516	0.232226	1.41906	0.299226	0.619441	0.483059	0.221402	1.38038	0.301995	0.666807	0.660693	0.450381	1.19124	0.457088	0.787046	0.432514	0.499124	1.39316	0.340408	0.60256
779	32.64	33.62	74.6	68.57	67.3	sp|O43852|CALU_HUMAN	Calumenin OS=Homo sapiens GN=CALU PE=1 SV=2	HUMAN	35			0.862979	0.288755	1.10662	0.731139	0.954993	1.05682	0.735954	1.07647	0.981748	1.1272	1.51356	0.0884264	1.24738	1.21339	1.85353	2.12814	0.0108791	1.40605	1.51356	2.96483	2.60615	0.00561368	1.5417	1.69044	3.94457	2.35505	0.000956178	1.45881	1.61436	3.40408	1.99526	0.025835	1.38038	1.44544	2.75423
778	32.64	33.96	59.72	55.75	48.61	sp|Q9UMS4|PRP19_HUMAN	Pre-mRNA-processing factor 19 OS=Homo sapiens GN=PRPF19 PE=1 SV=1	HUMAN	28			1	0.978747	1.09648	0.912011	1.08643	1.10662	0.459407	1.10662	1	1.22462	1.58489	0.0275243	1.22462	1.2942	1.92309	0.954993	0.99012	1.09648	0.870964	1.04713	0.981748	0.541543	1.09648	0.903649	1.07647	1.20226	0.572269	1.14815	1.04713	1.40605	1.02802	0.782617	1.09648	0.937562	1.1272
780	32.6	35.12	88.29	79.58	60.36	sp|P13804|ETFA_HUMAN	Electron transfer flavoprotein subunit alpha, mitochondrial OS=Homo sapiens GN=ETFA PE=1 SV=1	HUMAN	26			0.549541	0.811646	1.25893	0.501187	0.691831	1.51356	0.0913777	1.10662	1.36773	1.70608	1.67494	0.070796	1.15878	1.44544	1.90546	1.48594	0.168306	1.10662	1.34276	1.64437	1.87068	0.108805	1.18032	1.58489	2.03236	2.85759	0.000192022	1.24738	2.29087	3.49945	1.78649	0.0218657	1.1695	1.52757	2.18776
781	32.58	32.67	78.66	77.41	71.97	sp|P54819|KAD2_HUMAN	Adenylate kinase 2, mitochondrial OS=Homo sapiens GN=AK2 PE=1 SV=2	HUMAN	37			0.972747	0.667831	1.10662	0.887156	1.07647	1.6293	0.260633	1.24738	1.30617	2.22844	1.8197	0.207454	1.35519	1.34276	2.35505	1.05682	0.821959	1.10662	0.954993	1.1695	1.09648	0.901072	1.1272	0.972747	1.20226	1.92309	0.127514	1.35519	1.41906	2.39883	1.1695	0.604287	1.08643	1.07647	1.28233
782	32.56	54.23	63.72	51.69	44.94	sp|O60506|HNRPQ_HUMAN	Heterogeneous nuclear ribonucleoprotein Q OS=Homo sapiens GN=SYNCRIP PE=1 SV=2	HUMAN	38			1.0666	0.173766	1.07647	0.990832	1.15878	0.963829	0.538828	1.08643	0.887156	1.04713	1.11686	0.0950228	1.08643	1.02802	1.20226	0.758578	0.318962	1.14815	0.660693	0.870964	0.831764	0.384205	1.09648	0.751623	0.912011	0.824138	0.355721	1.10662	0.751623	0.912011	0.387258	0.0023357	1.41906	0.322107	0.549541
783	32.56	35.16	74.86	61.89	52.16	sp|Q08752|PPID_HUMAN	Peptidyl-prolyl cis-trans isomerase D OS=Homo sapiens GN=PPID PE=1 SV=3	HUMAN	22			1.22462	0.0996516	1.11686	1.09648	1.40605	0.428549	0.0226573	1.36773	0.313329	0.586138	0.744732	0.307941	1.11686	0.666807	0.831764	0.496592	0.0134273	1.33045	0.363078	0.660693	0.42462	0.00571506	1.38038	0.313329	0.586138	0.248886	0.000780967	1.5417	0.152757	0.383707	0.285759	0.00439655	1.59956	0.170608	0.457088
784	32.55	35.29	67.69	58.15	51.69	sp|P14550|AK1A1_HUMAN	Alcohol dehydrogenase [NADP+] OS=Homo sapiens GN=AKR1A1 PE=1 SV=3	HUMAN	23			0.92045	0.704756	1.1272	0.824138	1.03753	0.77983	0.575466	1.14815	0.691831	0.895365	0.519996	0.0853584	1.39316	0.440555	0.724436	0.92045	0.935091	1.10662	0.831764	1.01859	0.737904	0.262491	1.1695	0.666807	0.862979	1.15878	0.708342	1.1272	1.02802	1.33045	0.809096	0.626359	1.15878	0.724436	0.937562
785	32.52	32.97	71.15	61.23	52.64	sp|P36551|HEM6_HUMAN	Coproporphyrinogen-III oxidase, mitochondrial OS=Homo sapiens GN=CPOX PE=1 SV=3	HUMAN	26			0.794328	0.426038	1.13763	0.698232	0.903649	1.57036	0.272863	1.1272	1.39316	1.77011	1.52757	0.173983	1.1272	1.35519	1.77011	1.65959	0.396278	1.14815	1.44544	1.90546	1.36773	0.695699	1.1272	1.21339	1.59956	2.29087	0.0232457	1.21339	1.88799	2.85759	1.52757	0.525625	1.1695	1.30617	1.70608
786	32.5	37.37	42.36	27.85	20.7	sp|Q9NWH9|SLTM_HUMAN	SAFB-like transcription modulator OS=Homo sapiens GN=SLTM PE=1 SV=2	HUMAN	19			1.03753	0.320342	1.21339	0.855067	1.22462	0.672977	0.369422	1.38038	0.369828	0.928966	1.30617	0.0309477	1.20226	1.08643	1.6293	1.31826	0.00616668	1.21339	1.08643	1.72187	1.19124	0.0284273	1.18032	1.00925	1.45881	0.946237	0.596095	1.15878	0.801678	1.09648	1.11686	0.194355	1.15878	0.963829	1.35519
788	32.47	32.61	84.08	80.97	78.89	sp|P46926|GNPI1_HUMAN	Glucosamine-6-phosphate isomerase 1 OS=Homo sapiens GN=GNPDA1 PE=1 SV=1	HUMAN	33			1.39316	0.578456	1.20226	1.15878	1.57036	0.711214	0.977891	1.1695	0.57544	0.831764	1.1695	0.976511	1.11686	1.04713	1.30617	1.92309	0.358228	1.36773	1.40605	2.37684	2.05116	0.304585	1.39316	1.47231	2.42103	3.04789	0.0466455	1.5417	1.97697	3.94457	2.26986	0.142661	1.35519	1.67494	2.75423
787	32.47	33.38	50.25	45.16	38.75	sp|Q6L8Q7|PDE12_HUMAN	2',5'-phosphodiesterase 12 OS=Homo sapiens GN=PDE12 PE=1 SV=2	HUMAN	22			1.11686	0.886144	1.18032	0.946237	1.28233	0.903649	0.738959	1.15878	0.77983	1.04713	1.14815	0.219521	1.19124	0.963829	1.34276	0.92045	0.432623	1.14815	0.794328	1.05682	1.13763	0.437063	1.22462	0.928966	1.31826	1.04713	0.798153	1.18032	0.887156	1.23595	0.534564	0.988699	1.33045	0.452898	0.711214
789	32.45	35.06	38.08	26.57	16.88	sp|O60271|JIP4_HUMAN	C-Jun-amino-terminal kinase-interacting protein 4 OS=Homo sapiens GN=SPAG9 PE=1 SV=4	HUMAN	20			0.809096	0.468716	1.25893	0.432514	1.01859	1.01859	0.251129	1.24738	0.816582	1.24738	0.912011	0.962521	1.22462	0.717794	1.11686	1.09648	0.320866	1.20226	0.912011	1.33045	1.33045	0.0264628	1.22462	1.08643	1.72187	1.35519	0.00905668	1.23595	1.09648	1.85353	1.39316	0.0068195	1.23595	1.1272	1.88799
790	32.38	33.8	90.81	87.28	79.51	sp|P21796|VDAC1_HUMAN	Voltage-dependent anion-selective channel protein 1 OS=Homo sapiens GN=VDAC1 PE=1 SV=2	HUMAN	34			0.691831	0.245962	1.18032	0.580764	0.816582	1.19124	0.938847	1.09648	1.08643	1.30617	0.660693	0.52788	1.18032	0.554626	0.77983	1.18032	0.930133	1.10662	1.0666	1.2942	1.22462	0.883203	1.09648	1.11686	1.33045	0.608135	0.0807656	1.20226	0.487529	0.731139	0.248886	0.00425378	1.36773	0.205116	0.340408
791	32.36	33.36	62.24	51.57	44.58	sp|Q16555|DPYL2_HUMAN	Dihydropyrimidinase-related protein 2 OS=Homo sapiens GN=DPYSL2 PE=1 SV=1	HUMAN	19			1.20226	0.211504	1.23595	0.972747	1.47231	0.928966	0.660343	1.19124	0.758578	1.10662	1.03753	0.507	1.19124	0.870964	1.24738	1.20226	0.0448448	1.18032	1.01859	1.47231	1.38038	0.0255793	1.31826	1.04713	1.78649	1.14815	0.372144	1.20226	0.954993	1.36773	1.5417	0.0151948	1.34276	1.14815	1.97697
792	32.35	33.93	47.19	38.49	27.75	sp|Q08AM6|VAC14_HUMAN	Protein VAC14 homolog OS=Homo sapiens GN=VAC14 PE=1 SV=1	HUMAN	24			1.04713	0.768243	1.23595	0.847227	1.34276	0.855067	0.8373	1.19124	0.731139	1.01859	1.09648	0.635618	1.19124	0.92045	1.34276	1.00925	0.509124	1.20226	0.83946	1.24738	1.97697	0.0596833	1.44544	1.36773	2.70396	2.63027	0.0569039	1.65959	1.58489	4.36516	1.78649	0.0466572	1.30617	1.36773	3.10456
793	32.31	33.41	46.29	34.02	28.5	sp|Q9HCD5|NCOA5_HUMAN	Nuclear receptor coactivator 5 OS=Homo sapiens GN=NCOA5 PE=1 SV=2	HUMAN	23			0.608135	0.443294	1.19124	0.432514	0.724436	1.07647	0.725576	1.15878	0.928966	1.25893	1.13763	0.36018	1.13763	1	1.2942	1.08643	0.773271	1.14815	0.946237	1.23595	1.19124	0.328055	1.15878	1.02802	1.36773	1.18032	0.87778	1.1695	1.00925	1.38038	0.801678	0.99896	1.1695	0.672977	0.937562
794	32.28	34.11	46.97	29.73	24.03	sp|Q8TD16|BICD2_HUMAN	Protein bicaudal D homolog 2 OS=Homo sapiens GN=BICD2 PE=1 SV=1	HUMAN	18			1.11686	0.295629	1.20226	0.928966	1.34276	0.831764	0.282401	1.23595	0.672977	1.02802	0.787046	0.0515055	1.22462	0.630957	0.963829	0.717794	0.0325247	1.27057	0.469894	0.912011	0.744732	0.0103839	1.22462	0.519996	0.912011	0.60256	0.00036162	1.33045	0.30479	0.801678	0.879023	0.239952	1.20226	0.704693	1.05682
795	32.27	32.62	55.84	49.75	37.56	sp|P17812|PYRG1_HUMAN	CTP synthase 1 OS=Homo sapiens GN=CTPS PE=1 SV=2	HUMAN	22			1.08643	0.867121	1.10662	0.981748	1.23595	0.613762	0.0798237	1.30617	0.452898	0.801678	0.751623	0.092352	1.15878	0.597035	0.870964	0.648634	0.0673626	1.25893	0.47863	0.816582	0.469894	0.0281251	1.47231	0.280543	0.691831	0.619441	0.043045	1.25893	0.428549	0.77983	0.591562	0.0153237	1.31826	0.444631	0.77983
796	32.18	34.2	65.83	58.54	44.42	sp|Q9Y305|ACOT9_HUMAN	Acyl-coenzyme A thioesterase 9, mitochondrial OS=Homo sapiens GN=ACOT9 PE=1 SV=2	HUMAN	20			0.672977	0.164149	1.28233	0.554626	0.862979	1.04713	0.931389	1.1272	0.928966	1.20226	0.691831	0.182305	1.25893	0.580764	0.870964	1.95884	0.0436074	1.40605	1.39316	2.91072	1.80302	0.00845456	1.31826	1.36773	3.0761	1.6293	0.0706517	1.27057	1.28233	2.67917	1.43219	0.191695	1.25893	1.13763	2.10863
797	32.12	34.8	56.33	44.94	37.82	sp|A1L0T0|ILVBL_HUMAN	Acetolactate synthase-like protein OS=Homo sapiens GN=ILVBL PE=1 SV=2	HUMAN	23			1.03753	0.539659	1.14815	0.903649	1.20226	0.990832	0.587693	1.1695	0.847227	1.15878	1.03753	0.72601	1.14815	0.903649	1.21339	1.35519	0.295936	1.23595	1.09648	1.72187	1.1272	0.846302	1.1695	0.963829	1.38038	1.70608	0.016439	1.33045	1.28233	2.37684	1.33045	0.140107	1.20226	1.10662	1.72187
798	32.11	33.6	42.31	29.02	21.2	sp|Q9C0E2|XPO4_HUMAN	Exportin-4 OS=Homo sapiens GN=XPO4 PE=1 SV=2	HUMAN	21			0.990832	0.562071	1.23595	0.809096	1.22462	0.731139	0.66403	1.28233	0.524807	0.937562	0.862979	0.97797	1.24738	0.636796	1.07647	0.855067	0.797436	1.27057	0.57544	1.08643	0.772681	0.544574	1.27057	0.510505	0.981748	0.711214	0.545568	1.31826	0.461318	0.937562	0.654636	0.356918	1.33045	0.428549	0.870964
799	32.09	32.5	44.35	32.9	23.61	sp|Q14978|NOLC1_HUMAN	Nucleolar and coiled-body phosphoprotein 1 OS=Homo sapiens GN=NOLC1 PE=1 SV=2	HUMAN	21			1	0.826357	1.10662	0.903649	1.09648	0.772681	0.95303	1.1272	0.698232	0.870964	1.36773	0.0207892	1.10662	1.23595	1.52757	0.177011	0.000143966	1.90546	0.0928966	0.337287	0.214783	2.66212e-06	1.92309	0.113763	0.413047	0.275423	6.93259e-05	1.61436	0.128233	0.444631	0.224905	4.60591e-06	1.87068	0.114815	0.420727
800	32.03	33.77	70.49	64.48	55.74	sp|P50213|IDH3A_HUMAN	Isocitrate dehydrogenase [NAD] subunit alpha, mitochondrial OS=Homo sapiens GN=IDH3A PE=1 SV=1	HUMAN	31			0.765597	0.441269	1.14815	0.619441	0.879023	1.23595	0.872203	1.20226	1.02802	1.47231	1.44544	0.897855	1.33045	1.08643	1.75388	1.24738	0.706124	1.21339	1.02802	1.58489	1.15878	0.634206	1.19124	0.972747	1.38038	1.97697	0.0972361	1.49968	1.31826	2.55859	1.38038	0.328917	1.1695	1.18032	1.65959
801	32	38.99	39.57	28.7	17.72	sp|Q9NYF8|BCLF1_HUMAN	Bcl-2-associated transcription factor 1 OS=Homo sapiens GN=BCLAF1 PE=1 SV=2	HUMAN	20			0.824138	0.15143	1.14815	0.724436	0.946237	0.724436	0.319002	1.25893	0.630957	0.912011	1.33045	0.377353	1.22462	1.08643	1.59956	0.698232	0.0401731	1.24738	0.608135	0.870964	0.83946	0.337132	1.13763	0.737904	0.954993	0.691831	0.0205232	1.25893	0.544503	0.870964	0.666807	0.0735201	1.2942	0.57544	0.862979
802	31.98	32.51	37.64	20.7	12.36	sp|Q69YN4|VIR_HUMAN	Protein virilizer homolog OS=Homo sapiens GN=KIAA1429 PE=1 SV=2	HUMAN	20			1.5417	0.0112004	1.22462	1.25893	2.03236	1.65959	0.00443139	1.27057	1.30617	2.07014	1.34276	0.0740431	1.15878	1.15878	1.58489	0.946237	0.805891	1.18032	0.816582	1.11686	0.895365	0.40477	1.14815	0.772681	1.02802	1.43219	0.460309	1.24738	1.14815	1.85353	0.529663	0.162305	1.31826	0.440555	0.698232
803	31.9	32.01	91.29	90.04	87.14	sp|O00299|CLIC1_HUMAN	Chloride intracellular channel protein 1 OS=Homo sapiens GN=CLIC1 PE=1 SV=4	HUMAN	44			1.39316	0.302576	1.10662	1.25893	1.5417	0.296483	0.0055767	1.25893	0.246604	0.37325	0.401791	0.0185877	1.1695	0.325087	0.469894	1.40605	0.264449	1.10662	1.27057	1.51356	1.1695	0.909506	1.11686	1.04713	1.27057	0.903649	0.692398	1.0666	0.847227	0.963829	0.591562	0.67643	1.07647	0.549541	0.636796
804	31.87	34.6	66.75	58.61	50.72	sp|P43686|PRS6B_HUMAN	26S protease regulatory subunit 6B OS=Homo sapiens GN=PSMC4 PE=1 SV=2	HUMAN	23			1.0666	0.588768	1.11686	0.954993	1.21339	0.313329	0.0599172	1.72187	0.242103	0.539511	0.608135	0.158653	1.25893	0.413047	0.765597	0.809096	0.825515	1.13763	0.704693	0.92045	0.636796	0.438757	1.19124	0.570164	0.758578	0.912011	0.485312	1.13763	0.772681	1.03753	0.630957	0.986894	1.20226	0.539511	0.758578
805	31.84	32.52	61.64	50.19	39.31	sp|Q13177|PAK2_HUMAN	Serine/threonine-protein kinase PAK 2 OS=Homo sapiens GN=PAK2 PE=1 SV=3	HUMAN	20			1.11686	0.530783	1.14815	0.972747	1.31826	0.529663	0.11811	1.51356	0.363078	0.801678	0.801678	0.334702	1.20226	0.57544	0.963829	1.10662	0.566763	1.15878	0.954993	1.28233	0.954993	0.862822	1.15878	0.809096	1.10662	1	0.905241	1.14815	0.870964	1.15878	0.613762	0.461503	1.34276	0.413047	0.824138
806	31.79	32.41	84.6	67.42	50	sp|Q9NTK5|OLA1_HUMAN	Obg-like ATPase 1 OS=Homo sapiens GN=OLA1 PE=1 SV=2	HUMAN	25			1.31826	0.0503661	1.18032	1.11686	1.59956	0.586138	0.0365739	1.28233	0.505825	0.751623	0.654636	0.273581	1.22462	0.524807	0.801678	0.77983	0.885384	1.13763	0.642688	0.887156	0.685488	0.801985	1.19124	0.586138	0.816582	0.496592	0.104794	1.36773	0.363078	0.679204	0.608135	0.164515	1.2942	0.487529	0.787046
807	31.77	32.04	85.89	81.74	74.27	sp|P78417|GSTO1_HUMAN	Glutathione S-transferase omega-1 OS=Homo sapiens GN=GSTO1 PE=1 SV=2	HUMAN	25			1.33045	0.383253	1.15878	1.14815	1.57036	0.328095	0.0457136	1.34276	0.293765	0.440555	0.457088	0.0544305	1.13763	0.387258	0.519996	2.33346	0.0335303	1.33045	1.75388	2.93765	2.72898	0.0155492	1.34276	2.03236	3.66438	1.55597	0.207542	1.19124	1.30617	1.97697	1.85353	0.0510005	1.21339	1.52757	2.208
808	31.76	32.38	26.58	14.52	9.711	sp|Q92576|PHF3_HUMAN	PHD finger protein 3 OS=Homo sapiens GN=PHF3 PE=1 SV=3	HUMAN	18			1.04713	0.269122	1.20226	0.870964	1.31826	0.862979	0.580171	1.24738	0.636796	1.07647	1.2942	0.0220255	1.25893	1.02802	1.67494	1.27057	0.101142	1.28233	0.990832	1.64437	1.10662	0.442638	1.22462	0.903649	1.38038	1.36773	0.024572	1.30617	1.04713	1.78649	0.937562	0.822264	1.21339	0.765597	1.13763
809	31.73	33.2	48.15	33.1	24.19	sp|P11171|41_HUMAN	Protein 4.1 OS=Homo sapiens GN=EPB41 PE=1 SV=4	HUMAN	18			0.809096	0.772706	1.21339	0.666807	0.981748	0.963829	0.912969	1.18032	0.794328	1.13763	1.22462	0.16086	1.20226	1.01859	1.48594	0.758578	0.257804	1.22462	0.591562	0.928966	0.809096	0.592292	1.20226	0.660693	0.972747	0.83946	0.578934	1.19124	0.704693	1	0.510505	0.400897	1.57036	0.413047	0.801678
810	31.72	33.2	56.52	51.95	36.61	sp|P08621|RU17_HUMAN	U1 small nuclear ribonucleoprotein 70 kDa OS=Homo sapiens GN=SNRNP70 PE=1 SV=2	HUMAN	27			1.01859	0.677508	1.11686	0.912011	1.1272	1.55597	0.246331	1.28233	1.21339	1.77011	1.85353	0.057582	1.31826	1.40605	2.208	0.963829	0.826689	1.10662	0.870964	1.0666	1.11686	0.901737	1.14815	0.972747	1.23595	1.69044	0.327959	1.34276	1.25893	1.88799	1.64437	0.081549	1.35519	1.21339	1.87068
812	31.67	31.84	86.42	78.19	74.49	sp|P23396|RS3_HUMAN	40S ribosomal protein S3 OS=Homo sapiens GN=RPS3 PE=1 SV=2	HUMAN	33			0.981748	0.745493	1.05682	0.928966	1.03753	0.691831	0.100286	1.19124	0.597035	0.824138	0.794328	0.463789	1.11686	0.717794	0.887156	0.487529	0.0112135	1.33045	0.390841	0.648634	0.461318	0.00790346	1.41906	0.356451	0.654636	0.444631	0.00437943	1.44544	0.337287	0.642688	0.457088	0.0136925	1.40605	0.363078	0.642688
811	31.67	32.06	65.68	53.47	46.11	sp|Q96KP4|CNDP2_HUMAN	Cytosolic non-specific dipeptidase OS=Homo sapiens GN=CNDP2 PE=1 SV=2	HUMAN	27			0.887156	0.95753	1.15878	0.744732	1.02802	0.49204	0.140791	1.45881	0.383707	0.717794	0.591562	0.120313	1.21339	0.515229	0.717794	1	0.769066	1.10662	0.903649	1.10662	0.794328	0.454491	1.15878	0.636796	0.92045	0.816582	0.486844	1.1272	0.704693	0.92045	0.679204	0.444275	1.2942	0.580764	0.879023
813	31.63	32.21	54.14	40.46	34.1	sp|Q9Y5Q8|TF3C5_HUMAN	General transcription factor 3C polypeptide 5 OS=Homo sapiens GN=GTF3C5 PE=1 SV=2	HUMAN	17			0.642688	0.537966	1.19124	0.539511	0.765597	0.642688	0.133925	1.20226	0.529663	0.772681	0.691831	0.822149	1.1695	0.539511	0.809096	0.57544	0.0794386	1.25893	0.448745	0.724436	0.534564	0.0440705	1.2942	0.394457	0.691831	0.666807	0.188474	1.22462	0.529663	0.816582	0.432514	0.167343	1.38038	0.299226	0.597035
814	31.62	32.42	93.97	93.47	77.89	sp|Q06830|PRDX1_HUMAN	Peroxiredoxin-1 OS=Homo sapiens GN=PRDX1 PE=1 SV=1	HUMAN	47			1.45881	0.121641	1.13763	1.28233	1.67494	0.270396	0.0479576	1.49968	0.229087	0.405509	0.772681	0.231238	1.08643	0.704693	0.83946	0.903649	0.872947	1.07647	0.847227	0.972747	0.765597	0.530665	1.10662	0.711214	0.847227	0.679204	0.336694	1.1695	0.57544	0.794328	0.698232	0.479546	1.07647	0.654636	0.751623
815	31.61	33.78	91.34	84.65	83.07	sp|P18669|PGAM1_HUMAN	Phosphoglycerate mutase 1 OS=Homo sapiens GN=PGAM1 PE=1 SV=2	HUMAN	44			1.39316	0.351632	1.21339	1.14815	1.6293	0.586138	0.232662	1.22462	0.501187	0.717794	0.636796	0.485104	1.24738	0.483059	0.794328	1.22462	0.618058	1.15878	1.05682	1.38038	0.685488	0.530752	1.18032	0.564937	0.809096	0.801678	0.427168	1.1272	0.731139	0.903649	1.1695	0.795637	1.09648	1.0666	1.27057
816	31.59	32.66	52.85	40.84	32.28	sp|Q8N8A6|DDX51_HUMAN	ATP-dependent RNA helicase DDX51 OS=Homo sapiens GN=DDX51 PE=1 SV=3	HUMAN	19			0.724436	0.546025	1.2942	0.57544	0.937562	0.717794	0.583165	1.31826	0.586138	0.946237	0.92045	0.534905	1.1695	0.787046	1.07647	0.534564	0.069549	1.47231	0.359749	0.787046	0.483059	0.0483941	1.55597	0.376704	0.751623	0.83946	0.537672	1.20226	0.679204	1.00925	0.448745	0.0372352	1.69044	0.337287	0.758578
817	31.57	32.76	94.64	80.46	74.71	sp|P12004|PCNA_HUMAN	Proliferating cell nuclear antigen OS=Homo sapiens GN=PCNA PE=1 SV=1	HUMAN	42			1.10662	0.565332	1.07647	1.02802	1.21339	0.758578	0.553721	1.14815	0.672977	0.870964	0.928966	0.710075	1.07647	0.870964	1	0.283139	0.00624679	1.75388	0.205116	0.496592	0.195884	0.00235728	1.88799	0.136773	0.369828	0.946237	0.893029	1.0666	0.879023	1.00925	0.937562	0.318147	1.0666	0.879023	1
818	31.52	32.27	43.81	37.13	31.56	sp|Q32MZ4|LRRF1_HUMAN	Leucine-rich repeat flightless-interacting protein 1 OS=Homo sapiens GN=LRRFIP1 PE=1 SV=2	HUMAN	19			0.809096	0.949054	1.13763	0.672977	0.92045	0.559758	0.795843	1.31826	0.452898	0.737904	0.717794	0.326574	1.20226	0.586138	0.862979	0.92045	0.993155	1.13763	0.772681	1.04713	0.570164	0.211402	1.35519	0.452898	0.772681	0.787046	0.585471	1.19124	0.648634	0.937562	0.77983	0.793797	1.19124	0.666807	0.928966
819	31.46	34.66	31.71	14.88	7.012	sp|Q63HN8|RN213_HUMAN	RING finger protein 213 OS=Homo sapiens GN=RNF213 PE=1 SV=2	HUMAN	23			0.711214	0.0913742	1.23595	0.549541	0.879023	0.57544	0.0293396	1.45881	0.440555	0.83946	0.660693	0.121221	1.21339	0.539511	0.801678	0.903649	0.915621	1.20226	0.751623	1.08643	0.772681	0.307101	1.23595	0.586138	0.954993	0.824138	0.628026	1.19124	0.691831	0.981748	0.47863	0.0610351	1.49968	0.37325	0.717794
820	31.44	35.78	43.52	25.02	16.48	sp|Q4L180|FIL1L_HUMAN	Filamin A-interacting protein 1-like OS=Homo sapiens GN=FILIP1L PE=1 SV=2	HUMAN	19			0.711214	0.691788	1.20226	0.515229	0.855067	0.597035	0.740368	1.27057	0.359749	0.758578	0.794328	0.687592	1.1695	0.630957	0.928966	2.51189	8.87698e-07	1.51356	1.65959	3.98107	2.83139	2.19897e-07	1.49968	1.88799	4.32514	1.44544	0.00554363	1.28233	1.1272	1.92309	1.70608	0.00163146	1.34276	1.27057	2.39883
821	31.43	37.92	61.57	54.11	43.02	sp|Q8WXF1|PSPC1_HUMAN	Paraspeckle component 1 OS=Homo sapiens GN=PSPC1 PE=1 SV=1	HUMAN	27			0.870964	0.509783	1.18032	0.77983	1.02802	1.02802	0.640752	1.09648	0.937562	1.1272	1.55597	0.060664	1.20226	1.2942	1.85353	1.48594	0.181286	1.21339	1.22462	1.78649	1.22462	0.369245	1.11686	1.09648	1.40605	1.48594	0.109074	1.19124	1.24738	1.72187	1.41906	0.149733	1.13763	1.24738	1.59956
822	31.42	34.37	60.66	46.99	39.16	sp|Q9BVP2|GNL3_HUMAN	Guanine nucleotide-binding protein-like 3 OS=Homo sapiens GN=GNL3 PE=1 SV=2	HUMAN	21			1	0.445344	1.1272	0.887156	1.1272	0.765597	0.00864208	1.18032	0.636796	0.903649	1.20226	0.3747	1.1272	1.0666	1.38038	0.325087	8.22918e-05	1.72187	0.18197	0.559758	0.366438	3.25956e-06	1.55597	0.203236	0.570164	0.331131	6.52268e-06	1.59956	0.199526	0.529663	0.124738	0.000107256	2.58226	0.0717794	0.322107
823	31.31	32.73	44.13	27.93	24.51	sp|Q96HW7|INT4_HUMAN	Integrator complex subunit 4 OS=Homo sapiens GN=INTS4 PE=1 SV=2	HUMAN	19			0.972747	0.642767	1.09648	0.887156	1.0666	1.02802	0.285071	1.09648	0.937562	1.1272	1.03753	0.127965	1.09648	0.946237	1.13763	1.00925	0.699607	1.09648	0.92045	1.10662	1	0.497274	1.09648	0.912011	1.09648	1	0.601667	1.09648	0.912011	1.09648	0.972747	0.876374	1.10662	0.879023	1.07647
824	31.3	31.7	51.4	37.89	28.5	sp|P36915|GNL1_HUMAN	Guanine nucleotide-binding protein-like 1 OS=Homo sapiens GN=GNL1 PE=1 SV=2	HUMAN	20			0.758578	0.0119451	1.24738	0.515229	0.946237	0.554626	0.0402144	1.44544	0.299226	0.801678	0.554626	0.00375319	1.40605	0.30761	0.77983	0.824138	0.439988	1.19124	0.698232	0.981748	0.376704	0.000562827	1.77011	0.158489	0.666807	0.824138	0.0817402	1.21339	0.672977	1	1.28233	0.185186	1.20226	1.0666	1.57036
825	31.28	42.24	82.87	68.29	61.11	sp|Q8NBS9|TXND5_HUMAN	Thioredoxin domain-containing protein 5 OS=Homo sapiens GN=TXNDC5 PE=1 SV=2	HUMAN	38			0.672977	0.651407	1.1272	0.570164	0.758578	0.77983	0.614879	1.10662	0.724436	0.862979	1.51356	0.0828532	1.1695	1.2942	1.78649	0.972747	0.882205	1.0666	0.895365	1.03753	1.07647	0.331502	1.07647	1	1.1695	0.990832	0.802957	1.08643	0.903649	1.07647	0.717794	0.936709	1.19124	0.630957	0.855067
826	31.26	31.83	34.8	23.8	18.45	sp|O15294|OGT1_HUMAN	UDP-N-acetylglucosamine--peptide N-acetylglucosaminyltransferase 110 kDa subunit OS=Homo sapiens GN=OGT PE=1 SV=3	HUMAN	18			1.1272	0.331856	1.19124	0.946237	1.35519	0.744732	0.971495	1.25893	0.591562	0.937562	0.903649	0.912842	1.18032	0.765597	1.0666	0.954993	0.892808	1.18032	0.787046	1.1272	0.809096	0.850691	1.19124	0.666807	0.963829	0.903649	0.570867	1.18032	0.731139	1.0666	0.30479	0.0281929	1.64437	0.237684	0.501187
827	31.18	34.84	33.44	20.29	12.22	sp|P42695|CNDD3_HUMAN	Condensin-2 complex subunit D3 OS=Homo sapiens GN=NCAPD3 PE=1 SV=2	HUMAN	20			0.772681	0.189284	1.13763	0.679204	0.879023	0.801678	0.0814942	1.13763	0.704693	0.912011	1.01859	0.973933	1.14815	0.887156	1.15878	0.383707	6.22651e-05	1.44544	0.270396	0.554626	0.369828	0.000519997	1.45881	0.239883	0.539511	0.77983	0.327647	1.14815	0.685488	0.895365	0.496592	0.124162	1.23595	0.428549	0.613762
828	31.16	33.72	23.41	11.12	5.594	sp|Q9Y520|PRC2C_HUMAN	Protein PRRC2C OS=Homo sapiens GN=PRRC2C PE=1 SV=4	HUMAN	15			1.15878	0.659833	1.22462	0.946237	1.41906	1.13763	0.63692	1.19124	0.954993	1.35519	0.990832	0.989687	1.18032	0.831764	1.1695	0.816582	0.155348	1.21339	0.60256	0.990832	0.60256	0.0414663	1.41906	0.359749	0.855067	0.724436	0.064217	1.25893	0.465586	0.912011	0.847227	0.586715	1.21339	0.648634	1.02802
829	31.11	31.33	63.79	56.4	47.78	sp|Q9BS26|ERP44_HUMAN	Endoplasmic reticulum resident protein 44 OS=Homo sapiens GN=ERP44 PE=1 SV=1	HUMAN	32			0.642688	0.377129	1.28233	0.549541	0.824138	0.870964	0.525518	1.1272	0.751623	0.981748	1.03753	0.510758	1.13763	0.912011	1.19124	1.67494	0.0619625	1.2942	1.2942	2.42103	1.7378	0.0144085	1.34276	1.2942	2.53513	1.88799	0.0162985	1.38038	1.36773	2.83139	1.08643	0.385801	1.14815	0.946237	1.31826
830	31.1	31.15	78.29	72	65.43	sp|Q9Y3F4|STRAP_HUMAN	Serine-threonine kinase receptor-associated protein OS=Homo sapiens GN=STRAP PE=1 SV=1	HUMAN	21			1	0.409307	1.10662	0.903649	1.10662	0.717794	0.0913235	1.19124	0.586138	0.855067	0.772681	0.111106	1.14815	0.679204	0.887156	0.711214	0.0301031	1.18032	0.608135	0.83946	0.717794	0.0318764	1.18032	0.613762	0.847227	0.474242	0.00195294	1.43219	0.283139	0.679204	0.496592	0.000555149	1.43219	0.346737	0.711214
831	31.06	31.76	41.23	33.71	25.06	sp|Q14694|UBP10_HUMAN	Ubiquitin carboxyl-terminal hydrolase 10 OS=Homo sapiens GN=USP10 PE=1 SV=2	HUMAN	17			1.2942	0.936125	1.21339	1.0666	1.48594	0.794328	0.11713	1.18032	0.636796	0.937562	0.672977	0.0976158	1.24738	0.559758	0.83946	0.787046	0.0809536	1.19124	0.625173	0.937562	0.77983	0.160883	1.20226	0.660693	0.937562	0.448745	0.0166625	1.59956	0.316228	0.717794	0.724436	0.0399899	1.19124	0.586138	0.862979
832	30.99	34.02	49.94	34.52	23.25	sp|P49756|RBM25_HUMAN	RNA-binding protein 25 OS=Homo sapiens GN=RBM25 PE=1 SV=3	HUMAN	22			0.963829	0.849785	1.14815	0.847227	1.10662	1.34276	0.22402	1.1695	1.14815	1.57036	2.01372	0.00199608	1.44544	1.39316	2.75423	0.92045	0.852945	1.11686	0.809096	1.02802	1.22462	0.256976	1.22462	1	1.55597	1.59956	0.121739	1.33045	1.20226	2.29087	1.41906	0.0523985	1.25893	1.1272	1.78649
833	30.97	31.27	71.28	60.9	57.18	sp|P35237|SPB6_HUMAN	Serpin B6 OS=Homo sapiens GN=SERPINB6 PE=1 SV=3	HUMAN	24			0.990832	0.377949	1.14815	0.862979	1.13763	0.816582	0.856776	1.25893	0.672977	1.02802	0.487529	0.103005	1.59956	0.343558	0.77983	1.38038	0.125851	1.19124	1.15878	1.61436	1.33045	0.0911786	1.20226	1.10662	1.58489	1.38038	0.214919	1.24738	1.10662	1.65959	0.946237	0.40108	1.15878	0.831764	1.09648
834	30.95	31.98	42.25	31.68	22.86	sp|Q9HAU4|SMUF2_HUMAN	E3 ubiquitin-protein ligase SMURF2 OS=Homo sapiens GN=SMURF2 PE=1 SV=1	HUMAN	18			0.928966	0.92879	1.13763	0.809096	1.05682	0.698232	0.077773	1.22462	0.564937	0.855067	0.731139	0.0806673	1.19124	0.60256	0.870964	0.928966	0.523886	1.15878	0.801678	1.07647	0.990832	0.507009	1.13763	0.870964	1.1272	0.660693	0.0851905	1.25893	0.524807	0.831764	0.619441	0.0589234	1.27057	0.461318	0.787046
835	30.89	31.35	42.58	29.8	19.65	sp|O60502|NCOAT_HUMAN	Bifunctional protein NCOAT OS=Homo sapiens GN=MGEA5 PE=1 SV=2	HUMAN	19			0.981748	0.261668	1.24738	0.83946	1.22462	0.751623	0.405926	1.27057	0.625173	0.954993	0.625173	0.748484	1.39316	0.505825	0.870964	1.14815	0.0774656	1.1695	0.981748	1.43219	1.02802	0.378203	1.1695	0.879023	1.24738	1.0666	0.442725	1.19124	0.895365	1.40605	0.847227	0.266077	1.23595	0.679204	1.04713
836	30.88	32.14	70.03	62.21	58.31	sp|Q96AG4|LRC59_HUMAN	Leucine-rich repeat-containing protein 59 OS=Homo sapiens GN=LRRC59 PE=1 SV=1	HUMAN	33			1.03753	0.786524	1.09648	0.946237	1.18032	0.751623	0.521059	1.08643	0.672977	0.816582	1.85353	0.029827	1.25893	1.47231	2.22844	1.02802	0.767474	1.07647	0.954993	1.09648	1.21339	0.434102	1.11686	1.08643	1.39316	0.946237	0.977301	1.07647	0.887156	1.01859	0.862979	0.720063	1.09648	0.801678	0.946237
837	30.83	33.22	39.91	29.5	22.37	sp|Q92888|ARHG1_HUMAN	Rho guanine nucleotide exchange factor 1 OS=Homo sapiens GN=ARHGEF1 PE=1 SV=2	HUMAN	23			0.990832	0.980423	1.0666	0.928966	1.05682	0.990832	0.922216	1.07647	0.92045	1.0666	0.954993	0.551028	1.0666	0.895365	1.01859	0.954993	0.502922	1.0666	0.895365	1.01859	0.954993	0.640371	1.07647	0.887156	1.02802	0.981748	0.674311	1.0666	0.92045	1.04713	1	0.453971	1.07647	0.928966	1.07647
838	30.74	33.5	71.28	69.27	60.71	sp|P31689|DNJA1_HUMAN	DnaJ homolog subfamily A member 1 OS=Homo sapiens GN=DNAJA1 PE=1 SV=2	HUMAN	28			1.15878	0.697616	1.1695	0.990832	1.39316	0.619441	0.0502186	1.25893	0.461318	0.77983	0.928966	0.242712	1.15878	0.801678	1.07647	0.515229	0.011776	1.35519	0.325087	0.698232	0.363078	0.00131944	1.65959	0.207014	0.60256	0.519996	0.000938039	1.33045	0.369828	0.691831	0.586138	0.00379801	1.27057	0.469894	0.744732
839	30.72	31.88	80	71.47	62.06	sp|P62879|GBB2_HUMAN	Guanine nucleotide-binding protein G(I)/G(S)/G(T) subunit beta-2 OS=Homo sapiens GN=GNB2 PE=1 SV=3	HUMAN	30			0.57544	0.0663403	1.36773	0.340408	0.787046	1.14815	0.489432	1.13763	1.00925	1.39316	0.990832	0.163534	1.14815	0.870964	1.13763	1.14815	0.915717	1.14815	1	1.36773	1.28233	0.23162	1.1695	1.09648	1.77011	1.30617	0.14489	1.1695	1.11686	1.70608	1.07647	0.153712	1.13763	0.946237	1.34276
840	30.69	62.19	61.33	51.42	42.99	sp|Q10567|AP1B1_HUMAN	AP-1 complex subunit beta-1 OS=Homo sapiens GN=AP1B1 PE=1 SV=2	HUMAN	50			0.717794	0.115004	1.30617	0.608135	0.937562	0.83946	0.416794	1.21339	0.685488	1.01859	1.02802	0.608679	1.18032	0.870964	1.23595	1.10662	0.995374	1.1695	0.946237	1.36773	1.40605	0.21247	1.24738	1.1272	1.92309	1.52757	0.0954242	1.30617	1.1695	2.10863	0.794328	0.320429	1.19124	0.685488	0.946237
841	30.58	31.7	82.24	66.36	56.07	sp|P22087|FBRL_HUMAN	rRNA 2'-O-methyltransferase fibrillarin OS=Homo sapiens GN=FBL PE=1 SV=2	HUMAN	27			1.19124	0.766325	1.15878	1.02802	1.34276	0.946237	0.52242	1.09648	0.847227	1.03753	1.69044	0.0536915	1.25893	1.34276	2.10863	0.619441	0.148632	1.28233	0.524807	0.794328	0.436516	0.0156057	1.59956	0.328095	0.698232	0.990832	0.371959	1.08643	0.903649	1.07647	0.765597	0.228478	1.15878	0.660693	0.887156
843	30.54	31.59	76.29	69.6	63.22	sp|Q08257|QOR_HUMAN	Quinone oxidoreductase OS=Homo sapiens GN=CRYZ PE=1 SV=1	HUMAN	24			1.09648	0.935119	1.14815	0.954993	1.25893	0.824138	0.695767	1.22462	0.698232	1.00925	1.36773	0.463838	1.28233	1.0666	1.61436	1.24738	0.550474	1.21339	1.02802	1.44544	1.51356	0.347794	1.34276	1.1272	1.94089	1.78649	0.0917096	1.40605	1.27057	2.33346	1.77011	0.139028	1.40605	1.25893	2.24905
842	30.54	33.22	53.97	36.54	22.95	sp|Q93034|CUL5_HUMAN	Cullin-5 OS=Homo sapiens GN=CUL5 PE=1 SV=4	HUMAN	16			0.981748	0.440281	1.07647	0.912011	1.05682	0.954993	0.10364	1.07647	0.887156	1.02802	0.981748	0.85386	1.07647	0.912011	1.05682	1.00925	0.592019	1.07647	0.937562	1.08643	0.963829	0.527376	1.0666	0.903649	1.02802	0.990832	0.957777	1.07647	0.92045	1.0666	1	0.779271	1.0666	0.937562	1.0666
845	30.51	31.15	47.95	38.93	35.45	sp|P20073|ANXA7_HUMAN	Annexin A7 OS=Homo sapiens GN=ANXA7 PE=1 SV=3	HUMAN	19			0.824138	0.903727	1.22462	0.691831	1.00925	0.787046	0.883791	1.21339	0.660693	0.954993	0.383707	0.114974	1.30617	0.316228	0.501187	1.64437	0.116747	1.22462	1.34276	2.05116	2.01372	0.0604397	1.19124	1.69044	2.42103	1.09648	0.558874	1.1695	0.937562	1.28233	1.05682	0.306778	1.15878	0.912011	1.20226
844	30.51	31.2	70.25	56.2	52.89	sp|P35249|RFC4_HUMAN	Replication factor C subunit 4 OS=Homo sapiens GN=RFC4 PE=1 SV=2	HUMAN	17			0.83946	0.869941	1.13763	0.737904	0.954993	0.847227	0.997565	1.14815	0.751623	0.972747	1.05682	0.739881	1.1272	0.937562	1.22462	0.452898	0.114213	1.38038	0.363078	0.625173	0.77983	0.547745	1.18032	0.666807	0.92045	0.887156	0.8021	1.13763	0.77983	1.00925	0.648634	0.524378	1.19124	0.57544	0.772681
846	30.48	30.61	76.39	68.97	52.25	sp|Q9H7Z7|PGES2_HUMAN	Prostaglandin E synthase 2 OS=Homo sapiens GN=PTGES2 PE=1 SV=1	HUMAN	28			0.824138	0.7365	1.19124	0.698232	0.981748	1.23595	0.463118	1.1695	1.05682	1.55597	1.05682	0.295048	1.13763	0.928966	1.22462	0.954993	0.819035	1.13763	0.83946	1.08643	0.963829	0.617135	1.10662	0.862979	1.0666	1.1695	0.766055	1.1695	1	1.34276	0.92045	0.76775	1.11686	0.824138	1.02802
847	30.45	31.18	77.09	68.97	53.69	sp|Q9BT78|CSN4_HUMAN	COP9 signalosome complex subunit 4 OS=Homo sapiens GN=COPS4 PE=1 SV=1	HUMAN	22			0.92045	0.984877	1.19124	0.77983	1.09648	0.654636	0.639209	1.35519	0.554626	0.887156	0.724436	0.286788	1.28233	0.570164	0.928966	1.1695	0.881375	1.18032	0.990832	1.40605	0.772681	0.580528	1.24738	0.648634	0.963829	1.11686	0.709712	1.1695	0.954993	1.35519	0.648634	0.663674	1.35519	0.524807	0.879023
848	30.41	30.81	44.27	25.62	18.96	sp|Q6P179|ERAP2_HUMAN	Endoplasmic reticulum aminopeptidase 2 OS=Homo sapiens GN=ERAP2 PE=1 SV=2	HUMAN	17			0.765597	0.994873	1.20226	0.625173	0.92045	0.895365	0.851556	1.1695	0.691831	1.04713	0.77983	0.478096	1.21339	0.580764	0.946237	1.25893	0.0805116	1.15878	1.08643	1.47231	1.18032	0.13298	1.15878	1.01859	1.41906	1.64437	0.0148444	1.27057	1.2942	2.14783	0.758578	0.720218	1.19124	0.613762	0.903649
849	30.4	31.84	56.48	46.45	45.23	sp|P54727|RD23B_HUMAN	UV excision repair protein RAD23 homolog B OS=Homo sapiens GN=RAD23B PE=1 SV=1	HUMAN	33			1.14815	0.464716	1.09648	1.04713	1.24738	0.505825	0.493591	1.33045	0.413047	0.672977	0.648634	0.633829	1.24738	0.510505	0.809096	0.972747	0.883498	1.09648	0.895365	1.0666	0.83946	0.732434	1.10662	0.758578	0.928966	0.937562	0.684402	1.09648	0.809096	1.02802	0.847227	0.708863	1.09648	0.765597	0.928966
850	30.36	30.97	71.08	68.92	54.77	sp|Q13347|EIF3I_HUMAN	Eukaryotic translation initiation factor 3 subunit I OS=Homo sapiens GN=EIF3I PE=1 SV=1	HUMAN	21			1.1272	0.677871	1.14815	0.981748	1.33045	0.648634	0.111569	1.24738	0.505825	0.809096	0.928966	0.844072	1.13763	0.809096	1.05682	0.711214	0.167824	1.21339	0.549541	0.862979	0.570164	0.124784	1.30617	0.380189	0.744732	0.717794	0.166228	1.18032	0.559758	0.847227	0.57544	0.130264	1.34276	0.457088	0.772681
852	30.3	31.68	40.96	28.75	14.99	sp|Q9UM54|MYO6_HUMAN	Myosin-VI OS=Homo sapiens GN=MYO6 PE=1 SV=4	HUMAN	19			1.10662	0.955525	1.31826	0.83946	1.36773	0.887156	0.855567	1.23595	0.691831	1.09648	0.981748	0.863486	1.19124	0.824138	1.1695	1.45881	0.0695656	1.2942	1.1272	1.78649	1.38038	0.36296	1.28233	1.07647	1.69044	1.49968	0.105518	1.35519	1.10662	1.88799	1.67494	0.0746433	1.39316	1.20226	2.0893
851	30.3	31.71	36.36	22.9	14.77	sp|Q13308|PTK7_HUMAN	Inactive tyrosine-protein kinase 7 OS=Homo sapiens GN=PTK7 PE=1 SV=2	HUMAN	15			0.619441	0.02562	1.30617	0.457088	0.809096	1.35519	0.0649448	1.28233	1.05682	1.72187	1.31826	0.500773	1.28233	1.02802	1.58489	1.83654	0.024748	1.45881	1.25893	2.63027	1.61436	0.299046	1.39316	1.15878	2.10863	1.95884	0.0498285	1.48594	1.31826	3.13329	1.24738	0.358959	1.20226	1.03753	1.58489
853	30.28	31.59	37.41	23.45	16.12	sp|Q6PL18|ATAD2_HUMAN	ATPase family AAA domain-containing protein 2 OS=Homo sapiens GN=ATAD2 PE=1 SV=1	HUMAN	20			0.946237	0.977429	1.22462	0.794328	1.15878	0.794328	0.56442	1.22462	0.654636	0.972747	0.963829	0.458614	1.36773	0.801678	1.31826	0.903649	0.261732	1.25893	0.758578	1.13763	0.928966	0.304737	1.22462	0.787046	1.13763	0.698232	0.0765927	1.25893	0.549541	0.879023	0.390841	0.00404391	1.72187	0.301995	0.672977
854	30.25	33.72	39.12	24.11	15.67	sp|O95239|KIF4A_HUMAN	Chromosome-associated kinesin KIF4A OS=Homo sapiens GN=KIF4A PE=1 SV=3	HUMAN	20			0.77983	0.454142	1.19124	0.666807	0.928966	0.928966	0.876064	1.1695	0.801678	1.08643	0.870964	0.500632	1.1695	0.744732	1.01859	0.448745	0.0631834	1.51356	0.283139	0.679204	0.461318	0.0282923	1.45881	0.291072	0.672977	0.77983	0.802738	1.21339	0.654636	0.946237	0.737904	0.62122	1.23595	0.544503	0.912011
855	30.22	30.36	75.42	63.79	60.47	sp|P23193|TCEA1_HUMAN	Transcription elongation factor A protein 1 OS=Homo sapiens GN=TCEA1 PE=1 SV=2	HUMAN	24			1	0.959671	1.14815	0.870964	1.14815	0.591562	0.0748585	1.35519	0.436516	0.801678	0.549541	0.0741437	1.31826	0.409261	0.724436	0.672977	0.306579	1.30617	0.49204	0.879023	0.636796	0.152657	1.28233	0.515229	0.816582	0.704693	0.221941	1.19124	0.544503	0.83946	0.870964	0.570073	1.15878	0.731139	1.00925
856	30.19	30.47	42.71	32.99	23.91	sp|P19447|ERCC3_HUMAN	TFIIH basal transcription factor complex helicase XPB subunit OS=Homo sapiens GN=ERCC3 PE=1 SV=1	HUMAN	18			0.847227	0.673683	1.19124	0.704693	1.00925	0.912011	0.903667	1.14815	0.794328	1.04713	0.946237	0.711931	1.15878	0.809096	1.09648	0.946237	0.594594	1.18032	0.77983	1.11686	0.903649	0.756727	1.21339	0.77983	1.09648	1.01859	0.709835	1.14815	0.887156	1.18032	0.549541	0.863909	1.40605	0.432514	0.772681
857	30.18	32.63	67.71	59.12	41.51	sp|Q9Y2Z4|SYYM_HUMAN	Tyrosyl-tRNA synthetase, mitochondrial OS=Homo sapiens GN=YARS2 PE=1 SV=2	HUMAN	27			0.954993	0.610826	1.11686	0.862979	1.0666	0.912011	0.945234	1.11686	0.824138	1.01859	1.08643	0.85893	1.10662	0.981748	1.20226	1.04713	0.624501	1.10662	0.946237	1.15878	0.887156	0.706298	1.11686	0.801678	0.990832	1.18032	0.54832	1.11686	1.05682	1.33045	0.444631	0.609569	1.31826	0.359749	0.586138
858	30.14	31.93	68.27	62.5	55.05	sp|Q9HDC9|APMAP_HUMAN	Adipocyte plasma membrane-associated protein OS=Homo sapiens GN=APMAP PE=1 SV=2	HUMAN	24			0.855067	0.6166	1.25893	0.737904	1.07647	1.04713	0.562208	1.10662	0.946237	1.15878	1.83654	0.139561	1.39316	1.31826	2.46604	2.46604	0.0269785	1.55597	1.58489	3.34195	3.28095	0.00476513	1.8197	1.80302	5.29663	2.75423	0.0020613	1.58489	1.7378	4.32514	1.87068	0.101135	1.40605	1.33045	2.63027
859	30.13	30.28	67.69	54.36	44.62	sp|P08559|ODPA_HUMAN	Pyruvate dehydrogenase E1 component subunit alpha, somatic form, mitochondrial OS=Homo sapiens GN=PDHA1 PE=1 SV=3	HUMAN	20			0.660693	0.0300701	1.33045	0.452898	0.879023	0.928966	0.425044	1.18032	0.787046	1.09648	1.13763	0.881102	1.14815	0.990832	1.28233	1.44544	0.488838	1.2942	1.11686	1.78649	1.24738	0.955195	1.1695	1.0666	1.41906	1.41906	0.162246	1.23595	1.14815	1.61436	1.15878	0.824727	1.1272	1.02802	1.34276
860	30.12	30.34	56.18	43.82	36.7	sp|Q8NF37|PCAT1_HUMAN	Lysophosphatidylcholine acyltransferase 1 OS=Homo sapiens GN=LPCAT1 PE=1 SV=2	HUMAN	20			0.724436	0.546632	1.20226	0.613762	0.870964	0.809096	0.581956	1.1695	0.613762	0.946237	0.816582	0.967392	1.14815	0.704693	0.937562	0.824138	0.837876	1.23595	0.654636	1.01859	0.847227	0.958596	1.15878	0.731139	0.981748	0.744732	0.539789	1.18032	0.625173	0.879023	0.398107	0.0247354	1.30617	0.270396	0.519996
861	30.11	32.4	52.76	46.59	44.32	sp|Q9H0L4|CSTFT_HUMAN	Cleavage stimulation factor subunit 2 tau variant OS=Homo sapiens GN=CSTF2T PE=1 SV=1	HUMAN	22			1.04713	0.579002	1.40605	0.744732	1.43219	1.23595	0.856919	1.34276	0.92045	1.65959	1.61436	0.436768	1.49968	1.07647	2.24905	0.972747	0.540324	1.33045	0.711214	1.2942	1.48594	0.597977	1.48594	1	2.10863	1.20226	0.984972	1.34276	0.895365	1.59956	1.18032	0.467363	1.31826	0.895365	1.57036
862	30.11	30.22	63.94	57.06	51.86	sp|Q6XQN6|PNCB_HUMAN	Nicotinate phosphoribosyltransferase OS=Homo sapiens GN=NAPRT1 PE=1 SV=2	HUMAN	21			1.33045	0.363143	1.18032	1.1272	1.5417	1.15878	0.640753	1.19124	0.972747	1.35519	0.660693	0.707854	1.27057	0.483059	0.83946	1.78649	0.0104129	1.27057	1.40605	2.0893	1.22462	0.137507	1.1695	1.04713	1.39316	1.61436	0.354249	1.15878	1.39316	1.85353	1.03753	0.639383	1.14815	0.903649	1.19124
863	30.05	31.31	40.93	28.19	22.8	sp|O00139|KIF2A_HUMAN	Kinesin-like protein KIF2A OS=Homo sapiens GN=KIF2A PE=1 SV=3	HUMAN	18			1.02802	0.884169	1.18032	0.870964	1.21339	0.824138	0.276885	1.25893	0.591562	1.03753	1.02802	0.589618	1.19124	0.862979	1.20226	0.711214	0.0938643	1.30617	0.452898	0.928966	0.895365	0.529652	1.23595	0.636796	1.10662	1.14815	0.672283	1.1695	0.981748	1.35519	0.794328	0.0995381	1.28233	0.60256	1.01859
864	30.04	30.16	67.31	61.54	59.94	sp|Q53GQ0|DHB12_HUMAN	Estradiol 17-beta-dehydrogenase 12 OS=Homo sapiens GN=HSD17B12 PE=1 SV=2	HUMAN	30			0.401791	0.173266	1.52757	0.356451	0.613762	1.10662	0.550215	1.11686	0.990832	1.22462	0.990832	0.755884	1.11686	0.895365	1.10662	1.45881	0.0463235	1.22462	1.19124	1.92309	1.6293	0.0573609	1.23595	1.31826	2.07014	1.80302	0.0193976	1.27057	1.41906	2.39883	0.92045	0.296952	1.10662	0.83946	1.01859
865	30	32.46	36.54	20.26	11.11	sp|Q8WWI1|LMO7_HUMAN	LIM domain only protein 7 OS=Homo sapiens GN=LMO7 PE=1 SV=3	HUMAN	18			0.912011	0.947993	1.18032	0.765597	1.07647	0.895365	0.475416	1.21339	0.704693	1.08643	1.24738	0.0854437	1.24738	1	1.69044	1.04713	0.414905	1.18032	0.887156	1.28233	1.35519	0.0256101	1.27057	1.0666	1.97697	1.19124	0.0358053	1.20226	0.990832	1.61436	1.13763	0.287662	1.19124	0.954993	1.39316
866	29.99	31.89	71.73	58.43	51.07	sp|P11310|ACADM_HUMAN	Medium-chain specific acyl-CoA dehydrogenase, mitochondrial OS=Homo sapiens GN=ACADM PE=1 SV=1	HUMAN	27			0.954993	0.695736	1.1272	0.83946	1.07647	1.14815	0.718227	1.14815	1	1.43219	1.33045	0.232089	1.18032	1.1272	2.03236	1.20226	0.296284	1.14815	1.04713	1.49968	1.24738	0.281037	1.1695	1.0666	1.87068	1.64437	0.0311454	1.24738	1.31826	2.83139	1.1695	0.158693	1.1272	1.03753	1.33045
867	29.98	32.42	50.24	38.81	32.37	sp|Q99543|DNJC2_HUMAN	DnaJ homolog subfamily C member 2 OS=Homo sapiens GN=DNAJC2 PE=1 SV=4	HUMAN	19			1.43219	0.0224296	1.38038	1.03753	1.88799	1.00925	0.308793	1.27057	0.794328	1.25893	0.731139	0.670189	1.23595	0.591562	0.903649	0.801678	0.860975	1.22462	0.648634	0.981748	0.903649	0.890111	1.23595	0.724436	1.11686	0.772681	0.886118	1.22462	0.519996	0.946237	0.405509	0.450824	1.58489	0.244343	0.642688
868	29.93	32.37	81.31	66.78	65.4	sp|Q96HS1|PGAM5_HUMAN	Serine/threonine-protein phosphatase PGAM5, mitochondrial OS=Homo sapiens GN=PGAM5 PE=1 SV=2	HUMAN	25			1.13763	0.552345	1.09648	1.03753	1.24738	0.824138	0.535583	1.18032	0.691831	0.972747	1.15878	0.46729	1.1272	1.02802	1.27057	0.724436	0.253222	1.20226	0.648634	0.870964	0.679204	0.302939	1.25893	0.597035	0.855067	1.03753	0.927269	1.09648	0.946237	1.13763	0.636796	0.875813	1.24738	0.539511	0.794328
869	29.92	33.17	53.95	46.38	30.43	sp|O94826|TOM70_HUMAN	Mitochondrial import receptor subunit TOM70 OS=Homo sapiens GN=TOMM70A PE=1 SV=1	HUMAN	20			0.903649	0.136079	1.11686	0.801678	1.00925	0.862979	0.936505	1.15878	0.744732	1	1.31826	0.531004	1.18032	1.11686	1.5417	1.45881	0.615817	1.24738	1.1695	1.70608	1.78649	0.0067932	1.33045	1.34276	2.14783	0.831764	0.111538	1.15878	0.704693	0.963829	1.03753	0.777662	1.11686	0.928966	1.15878
870	29.9	39	33.67	21.82	14.14	sp|Q9H2M9|RBGPR_HUMAN	Rab3 GTPase-activating protein non-catalytic subunit OS=Homo sapiens GN=RAB3GAP2 PE=1 SV=1	HUMAN	26			1	0.133923	1.18032	0.847227	1.18032	0.809096	0.697438	1.25893	0.654636	1.01859	0.679204	0.300963	1.27057	0.515229	0.862979	0.981748	0.228417	1.18032	0.816582	1.15878	0.731139	0.60408	1.2942	0.496592	0.946237	0.691831	0.282915	1.34276	0.510505	0.928966	0.751623	0.666649	1.23595	0.625173	0.928966
871	29.84	32.37	39.92	18.45	11.51	sp|O00443|P3C2A_HUMAN	Phosphatidylinositol-4-phosphate 3-kinase C2 domain-containing subunit alpha OS=Homo sapiens GN=PIK3C2A PE=1 SV=2	HUMAN	17			1.0666	0.569643	1.19124	0.895365	1.28233	0.724436	0.00544353	1.23595	0.413047	0.895365	0.912011	0.413907	1.19124	0.654636	1.08643	0.946237	0.174227	1.20226	0.744732	1.13763	1.28233	0.813679	1.27057	1.00925	1.69044	1.13763	0.998016	1.21339	0.937562	1.38038	0.972747	0.293011	1.20226	0.731139	1.1695
872	29.83	30.78	70.23	63.43	57.93	sp|Q15785|TOM34_HUMAN	Mitochondrial import receptor subunit TOM34 OS=Homo sapiens GN=TOMM34 PE=1 SV=2	HUMAN	23			0.990832	0.491847	1.10662	0.895365	1.09648	0.613762	0.112465	1.31826	0.474242	0.809096	0.787046	0.513791	1.15878	0.636796	0.912011	0.691831	0.275437	1.23595	0.549541	0.855067	0.554626	0.1278	1.36773	0.390841	0.758578	0.751623	0.244069	1.1695	0.642688	0.879023	0.570164	0.317903	1.38038	0.440555	0.787046
873	29.82	32.18	66.31	56.16	48.38	sp|O75306|NDUS2_HUMAN	NADH dehydrogenase [ubiquinone] iron-sulfur protein 2, mitochondrial OS=Homo sapiens GN=NDUFS2 PE=1 SV=2	HUMAN	23			1.04713	0.732481	1.14815	0.912011	1.20226	0.816582	0.760803	1.20226	0.672977	0.981748	0.698232	0.515997	1.33045	0.57544	0.928966	1.01859	0.53259	1.15878	0.879023	1.19124	1.15878	0.154241	1.1695	0.990832	1.36773	0.972747	0.950176	1.15878	0.83946	1.1272	0.765597	0.204667	1.23595	0.630957	0.946237
874	29.77	30.72	37.74	27.04	20.75	sp|P21127|CD11B_HUMAN	Cyclin-dependent kinase 11B OS=Homo sapiens GN=CDK11B PE=1 SV=3	HUMAN	16			1.15878	0.441877	1.18032	0.981748	1.40605	1.08643	0.687601	1.15878	0.937562	1.31826	1.24738	0.0579411	1.18032	1.05682	1.5417	1.08643	0.780382	1.14815	0.946237	1.25893	1.24738	0.159233	1.22462	1.01859	1.64437	1.24738	0.15816	1.19124	1.04713	1.7378	1.18032	0.0367574	1.1695	1.00925	1.45881
875	29.75	30.33	64.41	50.36	47.94	sp|P17174|AATC_HUMAN	Aspartate aminotransferase, cytoplasmic OS=Homo sapiens GN=GOT1 PE=1 SV=3	HUMAN	20			1.09648	0.411303	1.13763	0.963829	1.34276	0.816582	0.503844	1.20226	0.625173	0.981748	0.772681	0.0913481	1.21339	0.529663	0.937562	1.08643	0.638617	1.1272	0.963829	1.28233	0.963829	0.901757	1.13763	0.831764	1.09648	1.14815	0.375791	1.13763	1.00925	1.44544	1.01859	0.7178	1.14815	0.887156	1.15878
876	29.74	30.71	31.9	24.55	17.73	sp|Q86VM9|ZCH18_HUMAN	Zinc finger CCCH domain-containing protein 18 OS=Homo sapiens GN=ZC3H18 PE=1 SV=2	HUMAN	16			0.787046	0.590306	1.22462	0.654636	0.963829	1.18032	0.156771	1.14815	1.02802	1.36773	1.33045	0.00952077	1.18032	1.1272	1.7378	0.824138	0.22673	1.18032	0.679204	0.972747	0.801678	0.743374	1.23595	0.630957	0.990832	0.990832	0.778408	1.13763	0.862979	1.1272	1.20226	0.0332858	1.14815	1.04713	1.45881
877	29.7	31.9	59.51	49.81	35.45	sp|Q13573|SNW1_HUMAN	SNW domain-containing protein 1 OS=Homo sapiens GN=SNW1 PE=1 SV=1	HUMAN	17			1.01859	0.532222	1.1272	0.903649	1.14815	1.0666	0.999139	1.1272	0.946237	1.21339	1.35519	0.0587933	1.20226	1.1272	1.65959	0.903649	0.394915	1.13763	0.801678	1.02802	1.0666	0.886846	1.14815	0.928966	1.27057	0.912011	0.393204	1.1272	0.809096	1.02802	0.737904	0.310764	1.24738	0.613762	0.92045
878	29.69	32.06	71.19	69.49	64.07	sp|P08865|RSSA_HUMAN	40S ribosomal protein SA OS=Homo sapiens GN=RPSA PE=1 SV=4	HUMAN	55			1.01859	0.857363	1.05682	0.963829	1.08643	0.824138	0.379978	1.08643	0.744732	0.895365	0.870964	0.447141	1.05682	0.816582	0.92045	0.597035	0.059801	1.18032	0.496592	0.704693	0.47863	0.0259066	1.34276	0.369828	0.642688	0.619441	0.044647	1.19124	0.487529	0.737904	0.366438	0.0282034	1.30617	0.288403	0.47863
879	29.68	32.08	74.38	66.98	60.49	sp|Q9NUQ9|FA49B_HUMAN	Protein FAM49B OS=Homo sapiens GN=FAM49B PE=1 SV=1	HUMAN	31			0.765597	0.120811	1.1695	0.648634	0.895365	0.801678	0.111419	1.18032	0.619441	0.946237	1	0.61601	1.11686	0.895365	1.11686	1.30617	0.0179433	1.1695	1.11686	1.61436	0.937562	0.600096	1.14815	0.816582	1.07647	1.35519	0.481464	1.24738	1.08643	1.75388	1.31826	0.215493	1.15878	1.13763	1.61436
880	29.64	29.7	69.08	58.5	52.37	sp|P11177|ODPB_HUMAN	Pyruvate dehydrogenase E1 component subunit beta, mitochondrial OS=Homo sapiens GN=PDHB PE=1 SV=3	HUMAN	23			0.758578	0.153287	1.1695	0.654636	0.887156	1.28233	0.172036	1.14815	1.11686	1.47231	1.33045	0.0908428	1.18032	1.1272	1.67494	1.58489	0.0104118	1.24738	1.27057	1.99526	1.69044	0.0367878	1.2942	1.30617	2.53513	1.80302	0.0129869	1.31826	1.36773	2.53513	0.698232	0.714288	1.20226	0.60256	0.83946
881	29.63	29.84	77.38	62.67	54.77	sp|Q9Y295|DRG1_HUMAN	Developmentally-regulated GTP-binding protein 1 OS=Homo sapiens GN=DRG1 PE=1 SV=1	HUMAN	17			1.43219	0.546969	1.23595	1.15878	1.75388	1	0.168746	1.1272	0.887156	1.1272	1.07647	0.530531	1.1272	0.954993	1.21339	0.691831	0.0720845	1.24738	0.539511	0.862979	0.879023	0.0631835	1.1272	0.772681	0.990832	0.698232	0.016013	1.22462	0.554626	0.855067	0.654636	0.0124007	1.22462	0.534564	0.801678
882	29.6	30.95	39.41	27.31	16.37	sp|O94851|MICA2_HUMAN	Protein MICAL-2 OS=Homo sapiens GN=MICAL2 PE=1 SV=1	HUMAN	20			0.636796	0.37	1.43219	0.343558	0.912011	0.801678	0.363673	1.25893	0.613762	1.00925	0.946237	0.865069	1.31826	0.731139	1.24738	1.47231	0.0623613	1.39316	1.05682	2.67917	1.44544	0.144331	1.38038	1.04713	2.29087	1.21339	0.194355	1.28233	0.946237	1.72187	1.07647	0.460283	1.2942	0.831764	1.67494
883	29.6	29.94	58.46	47.38	38.46	sp|Q9H4A4|AMPB_HUMAN	Aminopeptidase B OS=Homo sapiens GN=RNPEP PE=1 SV=2	HUMAN	18			0.954993	0.747686	1.18032	0.794328	1.1272	0.801678	0.8678	1.27057	0.642688	1.01859	0.731139	0.212895	1.27057	0.420727	0.928966	1.18032	0.170482	1.19124	0.990832	1.52757	0.862979	0.870316	1.18032	0.711214	1.01859	1.07647	0.432618	1.1695	0.92045	1.43219	1.00925	0.594318	1.1695	0.862979	1.19124
884	29.57	30.86	67.82	46.87	34.99	sp|Q9P2R7|SUCB1_HUMAN	Succinyl-CoA ligase [ADP-forming] subunit beta, mitochondrial OS=Homo sapiens GN=SUCLA2 PE=1 SV=3	HUMAN	19			1.0666	0.794922	1.13763	0.937562	1.20226	1.19124	0.888667	1.14815	1.03753	1.40605	1.49968	0.664282	1.21339	1.23595	1.80302	1.30617	0.705928	1.13763	1.14815	1.49968	1.20226	0.745182	1.1272	1.0666	1.36773	1.75388	0.32814	1.31826	1.33045	2.37684	0.937562	0.690758	1.13763	0.831764	1.0666
885	29.53	33.38	43.82	29.43	19.75	sp|Q68E01|INT3_HUMAN	Integrator complex subunit 3 OS=Homo sapiens GN=INTS3 PE=1 SV=1	HUMAN	19			1.03753	0.859633	1.14815	0.903649	1.19124	1.31826	0.615675	1.18032	1.11686	1.57036	1.28233	0.738614	1.22462	1.04713	1.5417	1	0.625735	1.18032	0.847227	1.1695	1.02802	0.656528	1.18032	0.870964	1.19124	1.01859	0.745277	1.1695	0.870964	1.20226	0.515229	0.316142	1.40605	0.376704	0.724436
886	29.51	33.5	51.01	27.28	21.81	sp|Q92974|ARHG2_HUMAN	Rho guanine nucleotide exchange factor 2 OS=Homo sapiens GN=ARHGEF2 PE=1 SV=4	HUMAN	21			1.1272	0.231495	1.18032	0.954993	1.34276	0.870964	0.543569	1.23595	0.691831	1.07647	0.737904	0.164927	1.2942	0.608135	0.954993	0.809096	0.135689	1.20226	0.685488	0.972747	1.19124	0.206644	1.20226	0.990832	1.55597	0.903649	0.805935	1.18032	0.758578	1.0666	0.895365	0.371255	1.19124	0.731139	1.0666
887	29.5	35.47	38.24	23.61	17.25	sp|P35251|RFC1_HUMAN	Replication factor C subunit 1 OS=Homo sapiens GN=RFC1 PE=1 SV=4	HUMAN	21			0.903649	0.881415	1.15878	0.77983	1.04713	0.801678	0.744654	1.18032	0.691831	0.946237	0.912011	0.55559	1.18032	0.77983	1.07647	0.310456	0.0207628	1.99526	0.2208	0.619441	0.737904	0.184767	1.22462	0.559758	0.903649	0.903649	0.598337	1.1695	0.77983	1.05682	0.895365	0.818222	1.14815	0.77983	1.02802
888	29.5	31.87	54.48	45.52	37.29	sp|Q9NY93|DDX56_HUMAN	Probable ATP-dependent RNA helicase DDX56 OS=Homo sapiens GN=DDX56 PE=1 SV=1	HUMAN	20			0.895365	0.915781	1.13763	0.77983	1.01859	0.903649	0.716772	1.15878	0.794328	1.04713	1.30617	0.388948	1.18032	1.10662	1.64437	0.413047	0.22028	1.39316	0.353183	0.57544	0.57544	0.495722	1.27057	0.440555	0.731139	0.717794	0.538999	1.15878	0.608135	0.831764	0.319154	0.146408	1.69044	0.258226	0.539511
889	29.47	34.04	76.28	68.27	62.18	sp|Q12904|AIMP1_HUMAN	Aminoacyl tRNA synthase complex-interacting multifunctional protein 1 OS=Homo sapiens GN=AIMP1 PE=1 SV=2	HUMAN	26			0.981748	0.720244	1.13763	0.870964	1.11686	0.928966	0.727462	1.13763	0.758578	1.05682	1.0666	0.683975	1.13763	0.937562	1.23595	0.928966	0.67432	1.14815	0.787046	1.0666	0.787046	0.405665	1.20226	0.586138	0.946237	0.870964	0.624676	1.13763	0.724436	0.990832	0.862979	0.418054	1.15878	0.685488	1
890	29.45	34.93	69.91	52.08	41.44	sp|Q96I99|SUCB2_HUMAN	Succinyl-CoA ligase [GDP-forming] subunit beta, mitochondrial OS=Homo sapiens GN=SUCLG2 PE=1 SV=2	HUMAN	22			0.49204	0.177522	1.59956	0.387258	0.787046	0.855067	0.657528	1.1695	0.731139	1	1.13763	0.685227	1.1695	0.972747	1.34276	1.05682	0.419222	1.15878	0.912011	1.22462	1.36773	0.110129	1.25893	1.08643	1.70608	1.24738	0.311343	1.18032	1.05682	1.48594	0.737904	0.641669	1.24738	0.625173	0.92045
891	29.42	29.83	73.48	62.02	46.97	sp|Q96CS3|FAF2_HUMAN	FAS-associated factor 2 OS=Homo sapiens GN=FAF2 PE=1 SV=2	HUMAN	23			0.625173	0.253981	1.39316	0.363078	0.870964	1	0.800815	1.1695	0.855067	1.14815	0.879023	0.773803	1.13763	0.751623	1	1.08643	0.352195	1.14815	0.946237	1.25893	1.20226	0.235276	1.1695	1.02802	1.55597	1.30617	0.0585946	1.18032	1.10662	1.87068	0.685488	0.877617	1.35519	0.501187	0.928966
892	29.41	30.09	51.81	34.58	27.44	sp|Q9Y2U8|MAN1_HUMAN	Inner nuclear membrane protein Man1 OS=Homo sapiens GN=LEMD3 PE=1 SV=2	HUMAN	19			0.737904	0.201727	1.22462	0.57544	0.903649	1.1272	0.0766715	1.28233	0.879023	1.35519	1.39316	0.282758	1.22462	1.13763	1.88799	0.954993	0.791278	1.1695	0.816582	1.11686	1.41906	0.0982756	1.24738	1.13763	2.03236	1.30617	0.510438	1.19124	1.09648	1.67494	0.559758	0.494402	1.36773	0.319154	0.765597
893	29.39	29.47	56.8	51.1	40.79	sp|P39656|OST48_HUMAN	Dolichyl-diphosphooligosaccharide--protein glycosyltransferase 48 kDa subunit OS=Homo sapiens GN=DDOST PE=1 SV=4	HUMAN	26			0.613762	0.516752	1.14815	0.534564	0.704693	1.22462	0.0815965	1.1272	1.08643	1.41906	1.11686	0.579845	1.20226	0.928966	1.31826	1.83654	0.0753493	1.22462	1.49968	2.1677	1.59956	0.261392	1.21339	1.31826	1.83654	1.44544	0.0834241	1.11686	1.2942	1.65959	0.809096	0.647893	1.10662	0.731139	0.895365
894	29.38	32.44	43.87	34.25	23.48	sp|Q5H9R7|PP6R3_HUMAN	Serine/threonine-protein phosphatase 6 regulatory subunit 3 OS=Homo sapiens GN=PPP6R3 PE=1 SV=2	HUMAN	18			1.0666	0.546576	1.1695	0.912011	1.27057	0.398107	0.0277482	1.38038	0.328095	0.549541	0.465586	0.135583	1.2942	0.380189	0.60256	0.691831	0.455811	1.23595	0.591562	0.855067	0.698232	0.577566	1.24738	0.580764	0.870964	0.534564	0.127744	1.33045	0.436516	0.711214	0.483059	0.247273	1.24738	0.413047	0.60256
895	29.37	32.93	44.32	33.09	25.19	sp|O75152|ZC11A_HUMAN	Zinc finger CCCH domain-containing protein 11A OS=Homo sapiens GN=ZC3H11A PE=1 SV=3	HUMAN	19			0.92045	0.92404	1.15878	0.758578	1.0666	1.14815	0.842274	1.14815	1	1.34276	1.43219	0.0432014	1.21339	1.18032	1.90546	0.544503	0.0248185	1.45881	0.325087	0.794328	0.724436	0.0876166	1.23595	0.570164	0.895365	1.14815	0.658541	1.14815	1	1.34276	0.981748	0.914821	1.14815	0.855067	1.1272
896	29.36	29.41	49.53	37.85	30.53	sp|Q8WVM8|SCFD1_HUMAN	Sec1 family domain-containing protein 1 OS=Homo sapiens GN=SCFD1 PE=1 SV=4	HUMAN	18			1.02802	0.873448	1.20226	0.855067	1.39316	0.870964	0.722036	1.19124	0.731139	1.03753	1.04713	0.769783	1.20226	0.870964	1.35519	1.1695	0.426147	1.22462	0.954993	1.52757	1.40605	0.0914506	1.27057	1.10662	2.12814	1.19124	0.380867	1.22462	0.972747	1.77011	1.1272	0.51232	1.20226	0.937562	1.49968
897	29.34	42.78	58.2	57.67	42.86	sp|P51991|ROA3_HUMAN	Heterogeneous nuclear ribonucleoprotein A3 OS=Homo sapiens GN=HNRNPA3 PE=1 SV=2	HUMAN	43			0.731139	0.148273	1.1695	0.570164	0.855067	1.39316	0.303057	1.20226	1.15878	1.64437	1.35519	0.0596325	1.19124	1.13763	1.55597	0.946237	0.754168	1.08643	0.870964	1.02802	0.963829	0.726908	1.09648	0.879023	1.05682	1.28233	0.3538	1.15878	1.10662	1.47231	0.465586	0.94764	1.39316	0.390841	0.648634
898	29.23	30.44	52.85	36.54	29.36	sp|Q6NYC8|PHTNS_HUMAN	Phostensin OS=Homo sapiens GN=KIAA1949 PE=1 SV=1	HUMAN	15			0.928966	0.580356	1.1272	0.801678	1.04713	1.0666	0.760055	1.1272	0.946237	1.30617	1.04713	0.851114	1.13763	0.92045	1.25893	1.39316	0.0730195	1.19124	1.1695	2.1677	1.44544	0.0562312	1.20226	1.20226	2.29087	1.36773	0.0724109	1.18032	1.15878	2.03236	1.5417	0.0178617	1.23595	1.24738	2.48886
900	29.22	29.35	53.08	40.77	40.77	sp|Q01581|HMCS1_HUMAN	Hydroxymethylglutaryl-CoA synthase, cytoplasmic OS=Homo sapiens GN=HMGCS1 PE=1 SV=2	HUMAN	20			0.879023	0.622663	1.21339	0.704693	1.0666	0.772681	0.448605	1.24738	0.510505	0.963829	0.666807	0.0885616	1.33045	0.363078	0.887156	0.990832	0.751615	1.21339	0.83946	1.20226	1.01859	0.559281	1.20226	0.847227	1.27057	0.564937	0.0173519	1.44544	0.251189	0.816582	0.648634	0.0652695	1.36773	0.340408	0.887156
899	29.22	31.84	36.68	24.11	19.7	sp|Q14139|UBE4A_HUMAN	Ubiquitin conjugation factor E4 A OS=Homo sapiens GN=UBE4A PE=1 SV=2	HUMAN	20			0.946237	0.380981	1.11686	0.847227	1.05682	0.954993	0.745313	1.10662	0.855067	1.05682	1	0.87078	1.10662	0.903649	1.10662	1.00925	0.948848	1.1272	0.895365	1.13763	1	0.849193	1.11686	0.895365	1.11686	1.01859	0.924284	1.11686	0.912011	1.14815	0.92045	0.54178	1.1272	0.816582	1.03753
901	29.21	31.14	37.65	19.51	12.68	sp|Q7Z460|CLAP1_HUMAN	CLIP-associating protein 1 OS=Homo sapiens GN=CLASP1 PE=1 SV=1	HUMAN	16			0.636796	0.0896999	1.25893	0.524807	0.801678	1.00925	0.757007	1.18032	0.855067	1.20226	0.711214	0.119418	1.2942	0.505825	0.92045	0.529663	0.0227672	1.45881	0.428549	0.772681	0.469894	0.00819882	1.47231	0.363078	0.691831	0.559758	0.0620766	1.41906	0.452898	0.794328	0.461318	0.013901	1.6293	0.277971	0.751623
902	29.18	32.34	46.09	37.68	23.91	sp|O15226|NKRF_HUMAN	NF-kappa-B-repressing factor OS=Homo sapiens GN=NKRF PE=1 SV=2	HUMAN	19			1.21339	0.889535	1.25893	0.963829	1.52757	1.08643	0.629238	1.23595	0.879023	1.33045	1.48594	0.061064	1.31826	1.1272	1.88799	0.92045	0.369567	1.23595	0.704693	1.13763	1.00925	0.990047	1.20226	0.83946	1.21339	1.1272	0.75345	1.21339	0.928966	1.36773	1.10662	0.949317	1.21339	0.912011	1.36773
903	29.17	31.38	32.78	24.53	18.45	sp|Q6P9B9|INT5_HUMAN	Integrator complex subunit 5 OS=Homo sapiens GN=INTS5 PE=1 SV=1	HUMAN	17			0.654636	0.262367	1.25893	0.47863	0.824138	0.630957	0.231657	1.31826	0.49204	0.831764	0.691831	0.238276	1.19124	0.559758	0.824138	0.77983	0.718603	1.15878	0.666807	0.903649	0.862979	0.553553	1.15878	0.737904	1	0.809096	0.903313	1.19124	0.691831	0.963829	0.636796	0.189293	1.25893	0.529663	0.801678
904	29.15	33.2	49.29	30.86	21.05	sp|Q9Y5B6|GCFC1_HUMAN	GC-rich sequence DNA-binding factor 1 OS=Homo sapiens GN=GCFC1 PE=1 SV=2	HUMAN	17			0.501187	0.153757	1.5417	0.387258	0.772681	0.685488	0.993668	1.27057	0.534564	0.870964	0.887156	0.784552	1.22462	0.711214	1.08643	0.570164	0.069516	1.39316	0.366438	0.794328	0.519996	0.0791633	1.44544	0.42462	0.751623	0.625173	0.172276	1.30617	0.49204	0.816582	0.717794	0.105728	1.22462	0.591562	0.879023
906	29.12	29.3	52.1	37.64	31.42	sp|Q6P1M0|S27A4_HUMAN	Long-chain fatty acid transport protein 4 OS=Homo sapiens GN=SLC27A4 PE=1 SV=1	HUMAN	19			0.903649	0.399881	1.28233	0.698232	1.15878	1.92309	0.153865	1.35519	1.41906	2.42103	0.981748	0.402357	1.34276	0.787046	1.31826	1.34276	0.438998	1.19124	1.1272	1.58489	1.33045	0.0665716	1.19124	1.11686	1.6293	1.52757	0.220707	1.19124	1.28233	1.85353	0.772681	0.61841	1.2942	0.630957	1
905	29.12	29.72	50.95	39.53	26.5	sp|O43395|PRPF3_HUMAN	U4/U6 small nuclear ribonucleoprotein Prp3 OS=Homo sapiens GN=PRPF3 PE=1 SV=2	HUMAN	15			1.04713	0.159974	1.1695	0.895365	1.22462	1.15878	0.485238	1.13763	1.01859	1.33045	1.65959	0.00783329	1.28233	1.2942	1.97697	1.01859	0.914991	1.2942	0.787046	1.20226	1.20226	0.353668	1.1695	1.02802	1.38038	1.35519	0.382793	1.19124	1.13763	1.57036	1.13763	0.481945	1.15878	0.981748	1.31826
907	29.09	30.58	47.91	33.92	25.3	sp|Q8IYQ7|THNS1_HUMAN	Threonine synthase-like 1 OS=Homo sapiens GN=THNSL1 PE=1 SV=2	HUMAN	17			0.801678	0.632523	1.1695	0.685488	0.937562	1.0666	0.707553	1.1695	0.912011	1.24738	0.831764	0.798229	1.18032	0.717794	0.981748	0.660693	0.406212	1.31826	0.554626	0.870964	0.496592	0.0488686	1.43219	0.288403	0.711214	1.04713	0.837093	1.1695	0.895365	1.23595	0.380189	0.278239	1.85353	0.231206	0.704693
908	29.08	32.47	49.66	33.56	24.7	sp|Q13617|CUL2_HUMAN	Cullin-2 OS=Homo sapiens GN=CUL2 PE=1 SV=2	HUMAN	19			0.787046	0.606932	1.22462	0.642688	0.963829	0.654636	0.240032	1.27057	0.465586	0.831764	0.409261	0.0787179	1.59956	0.224905	0.654636	0.679204	0.340496	1.25893	0.501187	0.855067	0.539511	0.17909	1.31826	0.30479	0.711214	0.809096	0.486703	1.19124	0.619441	0.963829	0.416869	0.611807	1.65959	0.260615	0.691831
909	29.08	31.2	44.1	37.37	34.92	sp|Q13049|TRI32_HUMAN	E3 ubiquitin-protein ligase TRIM32 OS=Homo sapiens GN=TRIM32 PE=1 SV=2	HUMAN	17			0.972747	0.715144	1.22462	0.816582	1.19124	0.751623	0.249332	1.33045	0.496592	1	0.751623	0.146235	1.27057	0.570164	0.954993	0.737904	0.196454	1.25893	0.591562	0.928966	0.887156	0.415728	1.19124	0.731139	1.05682	1.09648	0.976805	1.21339	0.903649	1.47231	0.862979	0.626189	1.22462	0.685488	1.05682
910	29.07	29.43	40.88	33.7	28.36	sp|P07947|YES_HUMAN	Tyrosine-protein kinase Yes OS=Homo sapiens GN=YES1 PE=1 SV=3	HUMAN	21			1.1695	0.570705	1.38038	0.847227	1.59956	1.70608	0.0996766	1.55597	1.09648	2.67917	1.05682	0.980767	1.44544	0.731139	1.44544	1.90546	0.35269	1.55597	1.22462	2.99226	1.13763	0.617394	1.38038	0.824138	1.57036	0.954993	0.996392	1.5417	0.636796	1.47231	0.608135	0.930703	1.6293	0.359749	0.990832
[truncated: 6,341 more rows]

## Sheet: Legend for Table S1
Legend for Table S1
Label	Description
[truncated: 20 more rows]
